# Supplementary material for: Genome-scale screens identify factors regulating tumor cell responses to natural killer cells
Source: Springer Nature journal article supplement (doi:10.1038/s41588-021-00889-w), 2021-07-12
Supplement: MOESM3 [file 41588_2021_889_MOESM3_ESM.xlsx]

## Sheet: Table S1 Header Info
Sensitivity: ‘0’ for sensitive lines (below median AUC) or ‘1’ for resistant lines (above median AUC)
Mesenchymal-like: ‘1’ for cells with mesenchymal-like molecular signature
Epithelial -like: ‘1’ for cells with Epithelial -like molecular signature
MSI: ‘1’ for cell-lines classified as MSI-high
B7H6 High: ‘1’ for cell-lines with high B7H6 protein scores
HLA negative: ‘1’ for cell-lines with low HLA protein scores

## Sheet: Table S1
Cell Lines	Tissue	24hr AUC	48hr AUC	72hr AUC	24hr sensitivity [sensitive=0, resistant=1]	48hr sensitivity [sensitive=0, resistant=1]	72hr sensitivity [sensitive=0, resistant=1]	Mesenchymal-Like [=1]	Epithelial-Like [=1]	MSI-HIGH [=1]	Protein Scores for B7H6	B7H6 High [=1]	Protein Scores for HLA	HLA negative [=1]
253J	urinary_tract	0.27322	0.13724	0.19006	1	1	0	1	0	0	-1.349	0	0.36677	0
5637	urinary_tract	0.26742	0.088618	0.13338	1	0	0	0	1	0	-1.2374	0	0.13708	0
253JBV	urinary_tract	0.2933	0.091539	0.19554	1	0	0	1	0	0	-0.9007	0	0.92262	0
42MGBA	central_nervous_system	0.16236	0.10995	0.11549	0	0	0	1	0	0	1.5022	1	1.1846	0
639V	urinary_tract	0.090992	0.033788	0.041558	0	0	0	1	0	1	1.7975	1	0.33767	0
22RV1	prostate	0.22685	0.040804	0.03125	0	0	0	0	1	1	0	0	0	0
647V	urinary_tract	0.24951	0.16157	0.22581	1	1	1	0	1	0	1.0529	1	0.78707	0
A253	salivary_gland	0.22162	0.28298	0.37736	0	1	1	0	1	0	0.76393	0	0.50165	0
769P	kidney	0.17142	0.070654	0.059458	0	0	0	1	0	0	0.2846	0	0.41043	0
ABC1	lung	0.073232	0.066851	0.18302	0	0	0	0	1	0	0	0	0	0
AGS	stomach	0.29044	0.13689	0.19245	1	1	0	0	1	0	-1.4159	0	0.85446	0
786O	kidney	0.35485	0.1069	0.15652	1	0	0	1	0	0	0.57494	0	0.47139	0
8305C	thyroid	0.36595	0.228	0.28126	1	1	1	1	0	0	-0.53114	0	0.39872	0
8505C	thyroid	0.17506	0.11242	0.15222	0	0	0	1	0	0	1.2143	1	0.3248	0
8MGBA	central_nervous_system	0.41566	0.24729	0.31636	1	1	1	1	0	0	-0.1321	0	0.87418	0
BEN	lung	0.35077	0.18725	0.38837	1	1	1	0	1	0	-0.37287	0	-0.5253	0
A101D	skin	0.22935	0.13065	0.19872	0	0	0	1	0	0	-0.58069	0	-0.25451	0
BFTC905	urinary_tract	0.63905	0.24804	0.10401	1	1	0	0	1	0	0.39504	0	0.39084	0
A172	central_nervous_system	0.17577	0.063928	0.10616	0	0	0	1	0	0	0	0	0.30722	0
A204	soft_tissue	0.23841	0.1447	0.32208	0	1	1	1	0	0	-0.41322	0	0.3419	0
A2058	skin	0.25335	0.31236	0.24301	1	1	1	1	0	0	-0.15701	0	0.44492	0
A2780	ovary	0.19067	0.052892	0.056903	0	0	0	1	0	0	2.8698	1	-2.2993	1
A375	skin	0.14772	0.30889	0.12933	0	1	0	1	0	0	-0.22365	0	0.64875	0
BHY	upper_aerodigestive_tract	0.31542	0.069628	0.20856	1	0	1	0	1	0	1.9835	1	-1.3434	0
A498	kidney	0.32554	0.10836	0.37569	1	0	1	1	0	0	0	0	0	0
BICR16	upper_aerodigestive_tract	0.14453	0.1575	0.20349	0	1	1	0	1	0	-0.54794	0	0.57588	0
A549	lung	0.46539	0.21042	0.36895	1	1	1	1	0	0	-0.50933	0	-0.72883	0
A673	bone	0.19461	0.069885	0.061095	0	0	0	1	0	0	-0.72844	0	-1.8428	1
BICR18	upper_aerodigestive_tract	0.67589	0.21529	0.4523	1	1	1	0	1	0	-1.2856	0	-2.6383	1
A704	kidney	0.21233	0.032007	0.03125	0	0	0	1	0	0	0	0	0	0
ACCMESO1	pleura	0.38982	0.5103	0.28191	1	1	1	1	0	0	1.8759	1	0.33341	0
ACHN	kidney	0.23788	0.33179	0.34038	0	1	1	1	0	0	0.71453	0	0.58405	0
AM38	central_nervous_system	0.03125	0.031269	0.30832	0	0	1	1	0	0	-0.97378	0	-1.2088	0
AN3CA	endometrium	0.20016	0.071415	0.19182	0	0	0	1	0	1	-0.70816	0	-1.9147	1
ASPC1	pancreas	0.38665	0.33519	0.42129	1	1	1	1	0	0	-0.62338	0	-0.033689	0
BC3C	urinary_tract	0.3368	0.11176	0.28652	1	0	1	1	0	0	1.6958	1	0.68149	0
BCPAP	thyroid	0.34494	0.03125	0.085374	1	0	0	1	0	0	0	0	0	0
BICR22	upper_aerodigestive_tract	0.047731	0.2956	0.46358	0	1	1	0	1	0	-0.36427	0	0.011385	0
BFTC909	kidney	0.20715	0.12114	0.27841	0	0	1	1	0	0	0.067697	0	0.73712	0
BHT101	thyroid	0.30913	0.084191	0.16176	1	0	0	1	0	0	0.78072	0	-0.39331	0
BT549	breast	0.18811	0.066394	0.098173	0	0	0	1	0	0	0	0	0	0
C32	skin	0.32518	0.28939	0.2957	1	1	1	1	0	0	-0.81601	0	0.63083	0
CADOES1	bone	0.33193	0.26956	0.29675	1	1	1	1	0	0	-0.85661	0	1.0143	0
CAKI1	kidney	0.33301	0.16188	0.23451	1	1	1	1	0	0	-0.27936	0	0.18873	0
CAKI2	kidney	0.137	0.078852	0.20363	0	0	1	1	0	0	-0.15091	0	0.79877	0
CAL120	breast	0.19716	0.043166	0.042058	0	0	0	1	0	0	1.3431	1	-0.13266	0
BICR31	upper_aerodigestive_tract	0.88436	0.2783	0.39034	1	1	1	0	1	0	-0.34586	0	0	0
CAL51	breast	0.2027	0.08397	0.048823	0	0	0	1	0	1	0.92108	0	-0.29533	0
CAL62	thyroid	0.32376	0.057404	0.081797	1	0	0	1	0	0	1.5494	1	-0.27472	0
BICR56	upper_aerodigestive_tract	0.13699	0.1985	0.22022	0	1	1	0	1	0	-0.49715	0	0.42585	0
CAL78	bone	0.2418	0.035622	0.053798	0	0	0	1	0	0	0	0	0	0
BICR6	upper_aerodigestive_tract	0.41833	0.20712	0.22458	1	1	1	0	1	0	-0.44095	0	-1.3042	0
CALU1	lung	0.4058	0.3984	0.43751	1	1	1	1	0	0	0.47498	0	0.66723	0
CALU6	lung	0.090354	0.055657	0.037093	0	0	0	1	0	0	1.6709	1	-1.7494	1
CAS1	central_nervous_system	0.068715	0.12451	0.077425	0	0	0	1	0	0	0	0	0	0
CCFSTTG1	central_nervous_system	0.33992	0.5513	0.18474	1	1	0	1	0	0	0	0	0	0
BT474	breast	0.78997	0.09747	0.8606	1	0	1	0	1	0	0.22795	0	0	0
CHP212	autonomic_ganglia	0.12546	0.091883	0.52367	0	0	1	1	0	0	0	0	0	0
COLO679	skin	0.096418	0.12006	0.1248	0	0	0	1	0	0	-0.59612	0	0	0
COLO741	skin	0.22363	0.254	0.24625	0	1	1	1	0	0	-0.39411	0	0.68633	0
COLO783	skin	0.063613	0.067125	0.058425	0	0	0	1	0	0	0.19551	0	0.37083	0
COLO792	skin	0.15908	0.19158	0.2544	0	1	1	1	0	0	0	0	0	0
COLO800	skin	0.46493	0.49678	0.29962	1	1	1	1	0	0	-0.58672	0	0.73183	0
CORL105	lung	0.44173	0.42822	1	1	1	1	1	0	0	-0.43277	0	0.57996	0
COV318	ovary	0.2332	0.060922	0.083409	0	0	0	1	0	0	-0.55047	0	0.20497	0
BXPC3	pancreas	0.4564	0.036381	0.21937	1	0	1	0	1	0	-0.43484	0	-0.80312	0
COV362	ovary	0.2134	0.2826	0.17704	0	1	0	1	0	0	-0.16894	0	0	0
DAOY	central_nervous_system	0.29956	0.19688	0.21649	1	1	1	1	0	0	1.1524	1	0.46384	0
DBTRG05MG	central_nervous_system	0.15948	0.17607	0.13739	0	1	0	1	0	0	0.54563	0	-0.073445	0
DKMG	central_nervous_system	0.10834	0.36035	0.39719	0	1	1	1	0	0	0	0	0	0
DMS273	lung	0.23331	0.13587	0.30716	0	1	1	1	0	0	-1.2027	0	0.56378	0
DU145	prostate	0.51386	0.11592	0.49497	1	0	1	1	0	1	-0.41549	0	0.60068	0
EFO21	ovary	0.22961	0.44928	0.36599	0	1	1	1	0	0	-0.4567	0	-1.5495	0
CAL12T	lung	0.49848	0.29175	0.53375	1	1	1	0	1	0	-1.1914	0	-0.97867	0
CAL27	upper_aerodigestive_tract	0.46331	0.32167	0.47162	1	1	1	0	1	0	-1.1055	0	0.80471	0
EFO27	ovary	0.24528	0.22394	0.23703	0	1	1	1	0	1	-0.1191	0	1.0908	0
EKVX	lung	0.052141	0.069768	0.18616	0	0	0	1	0	0	-0.32919	0	0.073971	0
EN	endometrium	0.20028	0.067829	0.050625	0	0	0	1	0	1	-0.070666	0	0	0
ES2	ovary	0.38841	0.34161	0.44366	1	1	1	1	0	0	-1.0462	0	-0.55082	0
ESS1	endometrium	0.48666	0.33437	0.76936	1	1	1	1	0	0	0.076818	0	1.2667	0
EW8	bone	0.066527	0.04407	0.033137	0	0	0	1	0	0	-0.47964	0	1.2774	0
EWS502	bone	0.17217	0.031254	0.078229	0	0	0	1	0	0	0	0	-2.1404	1
FTC133	thyroid	0.12014	0.098998	0.077028	0	0	0	1	0	0	0.51693	0	-0.041476	0
FTC238	thyroid	0.11121	0.031252	0.053557	0	0	0	1	0	1	-0.14473	0	-2.0635	1
G292CLONEA141B1	bone	0.03125	0.28207	0.19103	0	1	0	1	0	0	0	0	0	0
G361	skin	0.14921	0.22348	0.16269	0	1	0	1	0	0	0.15401	0	0.31166	0
G401	soft_tissue	0.25009	0.074396	0.044148	1	0	0	1	0	0	-0.64219	0	-1.9883	1
G402	soft_tissue	0.10016	0.038745	0.058812	0	0	0	1	0	0	0.02378	0	0.7061	0
GAMG	central_nervous_system	0.2375	0.12994	0.2054	0	0	1	1	0	0	-0.16302	0	0.7813	0
GB1	central_nervous_system	0.27395	0.079959	0.073024	1	0	0	1	0	0	-0.59935	0	0.8229	0
CAL29	urinary_tract	0.49897	0.20077	0.28098	1	1	1	0	1	0	-0.76694	0	1.2352	0
GCIY	stomach	0.3794	0.21411	0.16601	1	1	0	1	0	0	0.90294	0	0.16634	0
GCT	soft_tissue	0.30984	0.062137	0.081844	1	0	0	1	0	0	-0.35218	0	0.47517	0
GI1	central_nervous_system	0.12694	0.045223	0.13558	0	0	0	1	0	0	0.4613	0	-0.70004	0
GMS10	central_nervous_system	0.14771	0.33319	0.17329	0	1	0	1	0	0	0	0	-0.081646	0
GOS3	central_nervous_system	0.05811	0.06606	0.063155	0	0	0	1	0	0	1.6461	1	0.53231	0
CAL33	upper_aerodigestive_tract	0.38125	0.26279	0.34227	1	1	1	0	1	0	-0.45282	0	0.45628	0
CAMA1	breast	0.057749	0.34521	0.32454	0	1	1	0	1	0	0	0	0	0
H4	central_nervous_system	0.1258	0.30668	0.10226	0	1	0	1	0	0	-0.46055	0	1.0307	0
CAOV3	ovary	0.16353	0.13465	0.082068	0	0	0	0	1	0	-0.61978	0	0.53619	0
HCC1359	lung	0.25523	0.1721	0.22035	1	1	1	1	0	0	0.7473	0	0.9982	0
CAPAN2	pancreas	0.59358	0.29864	0.5663	1	1	1	0	1	0	-0.4932	0	0.23104	0
HCC1395	breast	0.20746	0.036979	0.15047	0	0	0	1	0	0	-0.35527	0	0	0
CCK81	large_intestine	0.031256	0.03125	0.03125	0	0	0	0	1	1	0	0	0	0
CFPAC1	pancreas	0.38167	0.56206	0.81721	1	1	1	0	1	0	-0.60933	0	0	0
CJM	skin	0.053901	0.33633	0.41732	0	1	1	0	1	0	-0.24335	0	0.93712	0
CL11	large_intestine	0.03125	0.031277	0.036703	0	0	0	0	1	0	-0.13846	0	0	0
CL34	large_intestine	0.25755	0.054761	0.064922	1	0	0	0	1	1	-0.95679	0	-0.15937	0
HCC1438	lung	0.20951	0.14701	0.10227	0	1	0	1	0	0	0	0	0	0
HCC15	lung	0.17484	0.034593	0.2668	0	0	1	1	0	0	-0.55302	0	1.3327	0
COLO668	lung	0.15673	0.042736	0.091242	0	0	0	0	1	0	-0.27076	0	0	0
HCC366	lung	0.30494	0.2876	0.13032	1	1	0	1	0	0	-1.0852	0	0.080574	0
HCC44	lung	0.64795	0.1603	0.57372	1	1	1	1	0	0	0.95787	0	-0.91286	0
HEC1B	endometrium	0.50348	0.19204	0.43677	1	1	1	1	0	1	0.73083	0	-1.4239	0
COLO678	large_intestine	0.48766	0.092007	0.23034	1	0	1	0	1	0	-1.2142	0	0.42968	0
HEC6	endometrium	0.12875	0.03125	0.043761	0	0	0	1	0	1	-0.80956	0	0.23612	0
HEP3B217	liver	0.16436	0.04081	0.19816	0	0	0	1	0	0	0	0	-0.23471	0
COLO680N	oesophagus	0.41416	0.32702	0.50099	1	1	1	0	1	0	-0.44495	0	1.4641	0
HEPG2	liver	0.37363	0.073155	0.2288	1	0	1	1	0	0	0	0	0.32912	0
HGC27	stomach	0.071959	0.03125	0.03125	0	0	0	1	0	0	2.606	1	1.3907	0
CORL23	lung	0.22652	0.093868	0.20438	0	0	1	0	1	0	1.2353	1	-0.56376	0
COV644	ovary	0.47222	0.26752	0.30172	1	1	1	0	1	0	-0.57774	0	-0.018352	0
DANG	pancreas	0.15168	0.19856	0.44433	0	1	1	0	1	0	-0.36718	0	0.57183	0
DETROIT562	upper_aerodigestive_tract	0.2232	0.11843	0.21942	0	0	1	0	1	0	-0.048447	0	0.2891	0
HLF	liver	0.086453	0.045984	0.046395	0	0	0	1	0	0	-0.62702	0	0.96703	0
HMC18	breast	0.4243	0.26848	0.39058	1	1	1	1	0	0	-1.2734	0	0.72659	0
DMS53	lung	0.36011	0.062033	0.3203	1	0	1	0	1	0	-0.94023	0	0.32045	0
DV90	lung	0.1826	0.074185	0.1247	0	0	0	0	1	1	2.4487	1	-2.1664	1
EBC1	lung	0.15227	0.067259	0.3289	0	0	1	0	1	0	-1.4297	0	1.3789	0
HOS	bone	0.070219	0.03125	0.036129	0	0	0	1	0	0	1.6216	1	1.0062	0
HS294T	skin	0.25026	0.19365	0.26437	1	1	1	1	0	0	-0.45476	0	1.2146	0
ECGI10	oesophagus	0.21234	0.2426	0.28069	0	1	1	0	1	0	1.3876	1	0.51308	0
HS729	soft_tissue	0.052189	0.040244	0.33921	0	0	1	1	0	0	0	0	0	0
EFE184	endometrium	0.51896	0.24308	0.58893	1	1	1	0	1	0	0	0	-0.38199	0
HS746T	stomach	0.05989	0.1423	0.3009	0	1	1	1	0	0	0	0	0.025799	0
HS766T	pancreas	0.99997	0.30984	0.45918	1	1	1	1	0	0	-0.31856	0	-0.84932	0
EFM19	breast	0.10672	0.13532	0.39809	0	1	1	0	1	0	-0.65014	0	0	0
HS852T	skin	0.33242	0.51038	0.49101	1	1	1	1	0	0	0	0	0	0
HS939T	skin	0.7311	0.065174	0.15895	1	0	0	1	0	0	-0.43068	0	0	0
HS944T	skin	0.30821	0.13485	0.070342	1	0	0	1	0	0	-0.53816	0	0.67195	0
EFM192A	breast	0.29733	0.45933	0.16921	1	1	0	0	1	0	-0.43689	0	0	0
HT1080	soft_tissue	0.44016	0.36071	0.57759	1	1	1	1	0	0	0.66658	0	0.27513	0
HT144	skin	0.18009	0.62333	0.51753	0	1	1	1	0	0	0	0	0	0
FADU	upper_aerodigestive_tract	0.55037	0.091515	0.36562	1	0	1	0	1	0	2.1228	1	0.84164	0
HUH1	liver	0.46793	0.14173	0.25355	1	1	1	1	0	0	-0.44891	0	0.46006	0
GP2D	large_intestine	0.23969	0.11455	0.097078	0	0	0	0	1	1	-0.47201	0	-2.4936	1
HUH28	biliary_tract	0.53859	0.17077	0.29124	1	1	1	1	0	0	0	0	0	0
GSU	stomach	0.20489	0.091848	0.09198	0	0	0	0	1	0	-0.79077	0	0	0
HARA	lung	0.44601	0.63289	0.68699	1	1	1	0	1	0	-0.36131	0	-1.5282	0
IALM	lung	0.070437	0.14546	0.52516	0	1	1	1	0	0	0	0	0	0
IGR1	skin	0.29525	0.17255	0.24092	1	1	1	1	0	0	-0.55825	0	0.54792	0
IGR37	skin	0.46641	0.46675	0.42657	1	1	1	1	0	0	-1.1582	0	1.118	0
IGROV1	ovary	0.08934	0.09353	0.073139	0	0	0	1	0	1	-1.3621	0	-0.025981	0
HCC1143	breast	0.34267	0.42553	0.21186	1	1	1	0	1	0	-0.67549	0	-1.3633	0
HCC1195	lung	0.13745	0.068005	0.061373	0	0	0	0	1	0	0	0	0	0
HCC1419	breast	0.14989	0.35087	0.4665	0	1	1	0	1	0	0	0	0	0
IPC298	skin	0.37302	0.24285	0.3238	1	1	1	1	0	0	-0.48734	0	0.76433	0
ISTMES1	pleura	0.28739	0.12765	0.12579	1	0	0	1	0	0	0.086055	0	-0.51272	0
HCC1428	breast	0.42237	0.081394	0.25043	1	0	1	0	1	0	0	0	0	0
ISTMES2	pleura	0.1196	0.1072	0.35358	0	0	1	1	0	0	0	0	-0.50026	0
HCC1588	lung	0.46118	0.0592	0.10251	1	0	0	0	1	0	-0.57197	0	1.3556	0
J82	urinary_tract	0.15249	0.096894	0.047293	0	0	0	1	0	0	1.4101	1	0.52458	0
HCC1806	breast	0.26874	0.10322	0.17487	1	0	0	0	1	0	-0.44296	0	0.44112	0
JHH4	liver	0.086261	0.071308	0.18554	0	0	0	1	0	0	-0.7612	0	-0.049345	0
JHH5	liver	0.031258	0.031253	0.20803	0	0	1	1	0	0	0.049794	0	0	0
HCC1937	breast	0.50643	0.16623	0.16709	1	1	0	0	1	0	0	0	-0.33781	0
JHH6	liver	0.13837	0.045506	0.072227	0	0	0	1	0	0	0.23902	0	0.42201	0
JHH7	liver	0.21723	0.18457	0.27301	0	1	1	1	0	0	-0.73904	0	0.99028	0
HCC1954	breast	0.34578	0.23201	0.3913	1	1	1	0	1	0	-0.69847	0	-0.19627	0
HCC38	breast	0.17322	0.034092	0.12544	0	0	0	0	1	0	-0.47773	0	0.63972	0
HCC4006	lung	0.58202	0.61823	0.45697	1	1	1	0	1	0	0.65092	0	0.55186	0
JHOC5	ovary	0.12271	0.071826	0.089023	0	0	0	1	0	0	0.29633	0	0.1606	0
HCC56	large_intestine	0.31707	0.066827	0.20708	1	0	1	0	1	0	-0.93212	0	0.55582	0
JHOM1	ovary	0.1768	0.05394	0.19213	0	0	0	1	0	0	-0.41773	0	0.14896	0
JHUEM2	endometrium	0.1984	0.04654	0.33648	0	0	1	1	0	1	-0.37566	0	0	0
JL1	pleura	0.088096	0.062572	0.21075	0	0	1	1	0	0	0	0	0	0
HCC78	lung	0.70436	0.37065	0.702	1	1	1	0	1	0	-0.51779	0	-0.83379	0
JMSU1	urinary_tract	0.23011	0.13267	0.16339	0	0	0	1	0	0	1.0725	1	0.82908	0
K029AX	skin	0.29772	0.18213	0.17596	1	1	0	1	0	0	0	0	0	0
KALS1	central_nervous_system	0.18022	0.063116	0.15068	0	0	0	1	0	0	0	0	-0.64401	0
HCC827	lung	0.3723	0.17201	0.33999	1	1	1	0	1	0	-0.71815	0	0.46762	0
HCC95	lung	0.4881	0.03125	0.19212	1	0	0	0	1	0	0	0	0	0
HCT116	large_intestine	0.4083	0.32599	0.48187	1	1	1	0	1	1	-1.1802	0	1.1365	0
KD	soft_tissue	0.039552	0.071285	0.065043	0	0	0	1	0	0	-0.26637	0	0.63526	0
KELLY	autonomic_ganglia	0.30066	0.17677	0.2288	1	1	1	1	0	0	-0.54056	0	-2.3814	1
HCT15	large_intestine	0.18199	0.03285	0.039463	0	0	0	0	1	1	2.4797	1	-2.6089	1
HDQP1	breast	0.86818	0.29161	0.61158	1	1	1	0	1	0	-0.44694	0	-0.14147	0
KMRC1	kidney	0.26485	0.23163	0.35663	1	1	1	1	0	0	0.25022	0	0.71625	0
KMRC20	kidney	0.1968	0.22769	0.19604	0	1	0	1	0	0	-0.53579	0	0.77559	0
HEC108	endometrium	0.15215	0.14262	0.17196	0	1	0	0	1	1	-0.68907	0	0.50545	0
KMRC3	kidney	0.061126	0.04387	0.039133	0	0	0	1	0	0	-0.2619	0	0.74785	0
KNS42	central_nervous_system	0.44437	0.43359	0.58864	1	1	1	1	0	0	-0.2481	0	0.2704	0
KNS60	central_nervous_system	0.11952	0.031254	0.064454	0	0	0	1	0	0	1.4328	1	0.98245	0
KNS81	central_nervous_system	0.1476	0.14703	0.28724	0	1	1	1	0	0	1.4789	1	0	0
KP3	pancreas	0.30783	0.18033	0.16367	1	1	0	1	0	0	1.5257	1	0.95943	0
KP4	pancreas	0.20353	0.099852	0.18921	0	0	0	1	0	0	0.14394	0	0.35858	0
KPNYN	autonomic_ganglia	0.22078	0.24822	0.18989	0	1	0	1	0	0	0	0	0	0
HEC151	endometrium	0.080942	0.083191	0.20679	0	0	1	0	1	1	-0.39661	0	-0.32703	0
HEC1A	endometrium	0.4957	0.17311	0.19544	1	1	0	0	1	1	-0.4015	0	-1.1173	0
HEC251	endometrium	0.21607	0.061164	0.14622	0	0	0	0	1	0	-0.87821	0	-1.1717	0
HEC265	endometrium	0.57687	0.041024	0.1846	1	0	0	0	1	1	-1.2613	0	-1.1902	0
KURAMOCHI	ovary	0.33231	0.14544	0.185	1	1	0	1	0	0	-0.84961	0	0	0
LCLC103H	lung	0.6264	0.26993	0.4475	1	1	1	1	0	0	0.60487	0	0.27983	0
HEC59	endometrium	0.21625	0.057244	0.10558	0	0	0	0	1	1	1.2994	1	-0.24456	0
LI7	liver	0.39204	0.14397	0.20627	1	1	1	1	0	0	1.5973	1	0.3829	0
LN18	central_nervous_system	0.25371	0.097934	0.28262	1	0	1	1	0	0	-0.48929	0	1.082	0
HPAC	pancreas	0.3719	0.34668	0.2928	1	1	1	0	1	0	-0.040839	0	0.17202	0
HSC2	upper_aerodigestive_tract	0.08445	0.069134	0.069698	0	0	0	0	1	0	0.43436	0	0.0040657	0
LN229	central_nervous_system	0.14557	0.15032	0.31887	0	1	1	1	0	0	-0.40628	0	0.60915	0
HSC3	upper_aerodigestive_tract	0.28938	0.23414	0.32051	1	1	1	0	1	0	2.574	1	0.95192	0
LOUNH91	lung	0.21196	0.38796	0.32138	0	1	1	1	0	0	0.5028	0	-0.26456	0
HT115	large_intestine	0.14468	0.031251	0.045538	0	0	0	0	1	0	-0.68447	0	0	0
LOXIMVI	skin	0.48964	0.36864	0.40612	1	1	1	1	0	0	0.56021	0	-0.47568	0
LU99	lung	0.17402	0.043649	0.058658	0	0	0	1	0	0	0.13399	0	-0.788	0
LXF289	lung	0.38528	0.25838	0.36092	1	1	1	1	0	0	1.3212	1	1.2992	0
HT1197	urinary_tract	0.8813	0.32853	0.20628	1	1	1	0	1	0	0	0	-2.1926	1
HT1376	urinary_tract	0.52061	0.47128	0.25465	1	1	1	0	1	0	-0.9084	0	1.1088	0
HT29	large_intestine	0.24446	0.20461	0.14575	0	1	0	0	1	0	2.6705	1	0.91549	0
MALME3M	skin	0.30837	0.22538	0.63032	1	1	1	1	0	0	-0.48541	0	0	0
MDAMB231	breast	0.73388	0.29199	0.52153	1	1	1	1	0	0	0.86718	0	0.4143	0
HT55	large_intestine	0.36446	0.30711	0.3101	1	1	1	0	1	0	-0.7337	0	0.30274	0
HUCCT1	biliary_tract	0.18439	0.27604	0.55243	0	1	1	0	1	0	1.7462	1	1.0645	0
MDAMB435S	skin	0.31614	0.061316	0.38681	1	0	1	1	0	0	-0.83589	0	1.2248	0
HUH6	liver	0.16056	0.088206	0.10491	0	0	0	0	1	0	0.30819	0	0	0
MDAMB436	breast	0.069674	0.031251	0.03125	0	0	0	1	0	0	-0.29577	0	0.81071	0
MELHO	skin	0.43779	0.10912	0.14676	1	0	0	1	0	0	-0.0012482	0	0.6767	0
HUPT3	pancreas	0.17244	0.033246	0.048414	0	0	0	0	1	0	0.83209	0	0.65331	0
MELJUSO	skin	0.32082	0.46696	0.32592	1	1	1	1	0	0	-0.75553	0	-0.63032	0
MESSA	soft_tissue	0.34838	0.18839	0.30684	1	1	1	1	0	0	-1.3232	0	-0.057296	0
HUPT4	pancreas	0.38821	0.41626	0.20281	1	1	0	0	1	0	0.10488	0	0	0
MEWO	skin	0.41718	0.065081	0.14243	1	0	0	1	0	0	-0.8427	0	0.49028	0
MFE296	endometrium	0.10346	0.16579	0.27955	0	1	1	1	0	1	-1.3887	0	0.92983	0
IM95	stomach	0.30344	0.032448	0.10701	1	0	0	0	1	1	2.0109	1	-2.5509	1
MG63	bone	0.10448	0.23603	0.32425	0	1	1	1	0	0	-1.0655	0	0.41816	0
ISHIKAWAHERAKLIO02ER	endometrium	0.1752	0.080114	0.10762	0	0	0	0	1	1	2.8024	1	-2.5798	1
JHH1	liver	0.77805	0.10576	0.65827	1	0	1	0	1	0	-0.65833	0	0	0
JHOS2	ovary	0.035631	0.061309	0.059193	0	0	0	0	1	0	0	0	0	0
MHHES1	bone	0.074141	0.052657	0.034916	0	0	0	1	0	0	-0.86371	0	0.31607	0
JIMT1	breast	0.27587	0.26138	0.43705	1	1	1	0	1	0	-1.1474	0	-1.0295	0
KE39	stomach	0.19355	0.14767	0.18196	0	1	0	0	1	0	2.1513	1	-0.12394	0
MIAPACA2	pancreas	0.43978	0.20211	0.27608	1	1	1	1	0	0	1.0144	0	-1.6812	1
MON	soft_tissue	0.2132	0.074453	0.10192	0	0	0	1	0	0	1.8234	1	-0.865	0
MPP89	pleura	0.56844	0.12451	0.36129	1	0	1	1	0	0	-0.25277	0	0.1126	0
KMBC2	urinary_tract	0.28151	0.089237	0.11112	1	0	0	0	1	0	-1.3753	0	0.84802	0
MSTO211H	pleura	0.087561	0.068226	0.13882	0	0	0	1	0	0	-0.50726	0	1.0559	0
NB1	autonomic_ganglia	0.16688	0.1169	0.30494	0	0	1	1	0	0	2.836	1	1.4392	0
NCIH1048	lung	0.29484	0.13466	0.12742	1	0	0	1	0	1	0.33232	0	1.4768	0
NCIH1299	lung	0.20025	0.043906	0.13387	0	0	0	1	0	0	1.2779	1	0.099985	0
KNS62	lung	0.23202	0.07165	0.19811	0	0	0	0	1	0	0	0	0	0
NCIH1339	lung	0.22319	0.12476	0.12192	0	0	0	1	0	0	0.058689	0	0	0
NCIH1355	lung	0.51575	0.14429	0.50893	1	1	1	1	0	0	0	0	0.04687	0
KP2	pancreas	0.2481	0.16122	0.25486	0	1	1	0	1	0	-0.23854	0	-0.9291	0
NCIH1563	lung	0.23836	0.096221	0.252	0	0	1	1	0	0	0	0	-2.2456	1
KPL1	breast	0.32341	0.11286	0.10055	1	0	0	0	1	0	-0.50521	0	-0.10676	0
NCIH1581	lung	0.27654	0.03125	0.03125	1	0	0	1	0	0	2.327	1	-2.2724	1
NCIH1651	lung	0.1565	0.033624	0.051621	0	0	0	1	0	0	-0.63449	0	0	0
KU1919	urinary_tract	0.19127	0.19832	0.2136	0	1	1	0	1	0	1.3653	1	1.1555	0
NCIH1703	lung	0.25438	0.071695	0.047472	1	0	0	1	0	0	-1.2257	0	1.0474	0
KYSE140	oesophagus	0.31998	0.16021	0.13343	1	1	0	0	1	0	-1.2493	0	-0.4397	0
KYSE150	oesophagus	0.31252	0.13907	0.26802	1	1	1	0	1	0	0.26155	0	0.087111	0
KYSE180	oesophagus	0.4292	0.195	0.23847	1	1	1	0	1	0	0.11446	0	-0.538	0
NCIH1793	lung	0.25791	0.19984	0.12413	1	1	0	1	0	0	-0.23365	0	0.44871	0
NCIH1915	lung	0.20622	0.21891	0.21602	0	1	1	1	0	0	1.2565	1	-0.46357	0
KYSE270	oesophagus	0.3909	0.22485	0.40662	1	1	1	0	1	0	1.8495	1	0.4335	0
KYSE410	oesophagus	0.14028	0.1197	0.17687	0	0	0	0	1	0	0.93939	0	-1.3237	0
NCIH1944	lung	0.41166	0.19891	0.24426	1	1	1	1	0	0	-0.3112	0	0.17764	0
NCIH1975	lung	0.36171	0.17034	0.23619	1	1	1	1	0	0	0.38222	0	0.25107	0
NCIH2023	lung	0.15014	0.33674	0.53085	0	1	1	1	0	0	-0.64614	0	-0.098302	0
NCIH2030	lung	0.36293	0.18441	0.29495	1	1	1	1	0	0	0.5312	0	0.05375	0
NCIH2077	lung	0.098248	0.048207	0.071692	0	0	0	1	0	0	2.5109	1	-2.3265	1
KYSE510	oesophagus	0.43745	0.29211	0.39178	1	1	1	0	1	0	-0.27509	0	0.86096	0
NCIH2172	lung	0.3019	0.37368	0.41322	1	1	1	1	0	0	-0.61276	0	0.4865	0
NCIH2228	lung	0.42908	0.58981	0.79274	1	1	1	1	0	0	0	0	0	0
NCIH226	lung	0.28783	0.18895	0.16232	1	1	0	1	0	0	0	0	0.52844	0
KYSE520	oesophagus	0.3425	0.055626	0.26542	1	0	1	0	1	0	0.69839	0	-1.486	0
NCIH23	lung	0.24859	0.045962	0.08206	0	0	0	1	0	0	0.40801	0	0.59649	0
NCIH2452	pleura	0.34866	0.19935	0.34809	1	1	1	1	0	0	0.34458	0	0.37889	0
NCIH28	pleura	0.13212	0.031253	0.03125	0	0	0	1	0	0	-0.077874	0	0.25596	0
NCIH446	lung	0.63706	0.30299	0.15171	1	1	0	1	0	0	0	0	0	0
KYSE70	oesophagus	0.19582	0.10999	0.13622	0	0	0	0	1	0	0.99536	0	-1.2655	0
L33	pancreas	0.38627	0.34173	0.51783	1	1	1	0	1	0	-1.1262	0	0.5678	0
NCIH460	lung	0.37034	0.22326	0.35551	1	1	1	1	0	0	-0.54299	0	0.86754	0
LK2	lung	0.21841	0.28715	0.28679	0	1	1	0	1	0	2.7031	1	-1.9391	1
LNCAPCLONEFGC	prostate	0.21186	0.13523	0.17221	0	0	0	0	1	1	0	0	0	0
LOVO	large_intestine	0.12698	0.033081	0.033859	0	0	0	0	1	1	2.0945	1	-2.4371	1
LS1034	large_intestine	0.46448	0.68868	0.66814	1	1	1	0	1	0	-0.4682	0	0	0
LS180	large_intestine	0.2644	0.29814	0.19686	1	1	0	0	1	1	2.18	1	-1.3833	0
NCIH520	lung	0.30247	0.28155	0.21798	1	1	1	1	0	0	-0.42213	0	-0.45158	0
NCIH522	lung	0.17669	0.07625	0.1365	0	0	0	1	0	0	-0.51141	0	-1.507	0
NCIH650	lung	0.34989	0.10053	0.25556	1	0	1	1	0	0	0.015329	0	0.36268	0
NCIH661	lung	0.047751	0.031251	0.18368	0	0	0	1	0	0	-0.45863	0	-1.5927	0
NCIH838	lung	0.10231	0.046398	0.088351	0	0	0	1	0	0	1.7209	1	-0.20574	0
NCIH841	lung	0.27865	0.19775	0.16847	1	1	0	1	0	0	0.1642	0	1.2883	0
LS411N	large_intestine	0.3289	0.23509	0.34954	1	1	1	0	1	1	-0.47582	0	-2.3539	1
LS513	large_intestine	0.17641	0.063942	0.14859	0	0	0	0	1	0	-1.4022	0	1.0998	0
NMCG1	central_nervous_system	0.40557	0.10689	0.087344	1	0	0	1	0	0	0	0	0	0
OC314	ovary	0.21903	0.082207	0.13395	0	0	0	1	0	1	0.21701	0	-2.0383	1
ONS76	central_nervous_system	0.13106	0.086282	0.146	0	0	0	1	0	0	-0.084984	0	-0.34869	0
OSRC2	kidney	0.058897	0.15082	0.24171	0	1	1	1	0	0	-0.51352	0	-1.571	0
LUDLU1	lung	0.62209	0.28178	0.8079	1	1	1	0	1	0	-0.41994	0	0.11881	0
MCAS	ovary	0.44817	0.23427	0.43333	1	1	1	0	1	0	2.2382	1	0.94448	0
MCF7	breast	0.47185	0.1862	0.19289	1	1	0	0	1	0	-0.48348	0	0.09358	0
OV56	ovary	0.25255	0.32585	0.14879	1	1	0	1	0	0	-0.38902	0	0.12496	0
OV7	ovary	0.37317	0.34819	0.28827	1	1	1	1	0	0	0	0	0	0
MDAMB175VII	breast	0.96009	0.032068	0.072512	1	0	0	0	1	0	-0.10574	0	0	0
MDAMB468	breast	0.3392	0.03125	0.099604	1	0	0	0	1	0	0	0	0	0
OVCAR8	ovary	0.18689	0.049564	0.034478	0	0	0	1	0	0	0.58983	0	-2.4092	1
OVK18	ovary	0.14962	0.21233	0.43548	0	1	1	1	0	1	-1.4437	0	-0.74342	0
MFE280	endometrium	0.20598	0.11123	0.049761	0	0	0	0	1	0	-0.8856	0	-0.60333	0
OVSAHO	ovary	0.52532	0.032763	0.23096	1	0	1	1	0	0	-0.47391	0	0.18321	0
OVTOKO	ovary	0.21987	0.13635	0.21346	0	1	1	1	0	0	0	0	0	0
MFE319	endometrium	0.18757	0.051827	0.27293	0	0	1	0	1	1	-1.298	0	-2.5221	1
PANC1	pancreas	0.26995	0.087585	0.17342	1	0	0	1	0	0	-0.025316	0	0.26082	0
PATU8988T	pancreas	0.15532	0.04124	0.064761	0	0	0	1	0	0	1.7717	1	0.69613	0
PK45H	pancreas	0.055766	0.045275	0.057874	0	0	0	1	0	0	0.8148	0	0.10632	0
PLCPRF5	liver	0.31531	0.14783	0.27759	1	1	1	1	0	0	0	0	-0.81839	0
PSN1	pancreas	0.24888	0.12814	0.17331	0	0	0	1	0	0	1.1729	1	-0.17763	0
RCC10RGB	kidney	0.79161	0.83643	0.30845	1	1	1	1	0	0	-0.69373	0	0	0
RD	soft_tissue	0.059169	0.055225	0.083167	0	0	0	1	0	0	0	0	0	0
MKN45	stomach	0.56007	0.35934	0.52979	1	1	1	0	1	0	-0.8931	0	0.5169	0
RDES	bone	0.1827	0.08236	0.24987	0	0	1	1	0	0	-1.0953	0	0	0
RERFLCAI	lung	0.2749	0.10911	0.2632	1	0	1	1	0	0	-0.96523	0	0.89451	0
RERFLCMS	lung	0.046699	0.036875	0.050907	0	0	0	1	0	0	0	0	-1.0642	0
RH30	soft_tissue	0.33803	0.17789	0.33803	1	1	1	1	0	0	-0.37841	0	-0.41628	0
RKN	soft_tissue	0.03125	0.068105	0.19778	0	0	0	1	0	0	-0.22868	0	0.14305	0
RKO	large_intestine	0.2581	0.051349	0.27469	1	0	1	1	0	1	2.3571	1	0.75329	0
MKN7	stomach	0.1078	0.091596	0.12179	0	0	0	0	1	0	-0.60262	0	-0.15037	0
MKN74	stomach	0.24556	0.066712	0.11219	0	0	0	0	1	0	-0.21334	0	-0.68584	0
NCIH1373	lung	0.54208	0.34448	0.72672	1	1	1	0	1	0	0	0	0	0
NCIH1435	lung	0.38992	0.17679	0.17049	1	1	0	0	1	0	-0.66678	0	0	0
NCIH1437	lung	0.45111	0.41961	0.33176	1	1	1	0	1	0	-1.0274	0	-1.2465	0
NCIH1568	lung	0.15345	0.084108	0.20925	0	0	1	0	1	0	-0.3036	0	-1.1534	0
RPMI7951	skin	0.3313	0.21248	0.16646	1	1	0	1	0	0	0	0	-0.75815	0
NCIH1573	lung	0.037227	0.16764	0.75476	0	1	1	0	1	0	0	0	0	0
RVH421	skin	0.11129	0.18178	0.051485	0	1	0	1	0	0	0	0	0	0
NCIH1623	lung	0.47337	0.21993	0.071412	1	1	0	0	1	0	0	0	0	0
NCIH1648	lung	0.22656	0.11924	0.18628	0	0	0	0	1	0	-0.52885	0	-0.2153	0
S117	soft_tissue	0.30332	0.12272	0.090475	1	0	0	1	0	0	0.27301	0	-0.28497	0
SBC5	lung	0.27656	0.058051	0.14958	1	0	0	1	0	0	-1.3361	0	0.58817	0
NCIH1650	lung	0.25997	0.14629	0.28027	1	1	1	0	1	0	-0.38112	0	0.40654	0
NCIH1693	lung	0.15365	0.046675	0.034214	0	0	0	0	1	0	0.041012	0	0.35029	0
SF126	central_nervous_system	0.35086	0.13224	0.12281	1	0	0	1	0	0	-0.12565	0	1.2561	0
SF295	central_nervous_system	0.18904	0.16074	0.15851	0	1	0	1	0	0	-0.51564	0	0	0
NCIH1838	lung	0.14669	0.042187	0.091134	0	0	0	0	1	0	-0.66252	0	0	0
SF539	central_nervous_system	0.11893	0.13005	0.08944	0	0	0	1	0	0	-0.1973	0	0.70109	0
SH10TC	stomach	0.36458	0.064257	0.18376	1	0	0	1	0	0	-0.017399	0	-0.065329	0
NCIH2009	lung	0.64921	0.085276	0.098583	1	0	0	0	1	0	-0.52214	0	0	0
NCIH2073	lung	0.29357	0.21519	0.45572	1	1	1	0	1	0	-0.99121	0	0.61343	0
SH4	skin	0.15283	0.8371	0.20008	0	1	0	1	0	0	0	0	0	0
SJSA1	bone	0.13007	0.04288	0.070382	0	0	0	1	0	0	-0.31491	0	1.5154	0
NCIH2087	lung	0.38711	0.26869	0.21286	1	1	1	0	1	0	0	0	-0.88081	0
SKHEP1	liver	0.32616	0.15612	0.51904	1	1	1	1	0	0	0.6824	0	-0.65783	0
SKLU1	lung	0.16571	0.21264	0.30313	0	1	1	1	0	0	0	0	0	0
SKMEL24	skin	0.40153	0.27236	0.516	1	1	1	1	0	0	-0.33935	0	0.6049	0
SKMEL3	skin	0.20156	0.14321	0.092435	0	1	0	1	0	0	0	0	0	0
SKMEL30	skin	0.22837	0.19109	0.37742	0	1	1	1	0	0	-0.33263	0	0.40264	0
SKMEL5	skin	0.72582	0.38997	0.53062	1	1	1	1	0	0	-0.71312	0	1.1651	0
SKNAS	autonomic_ganglia	0.29313	0.19632	0.1601	1	1	0	1	0	0	-0.52659	0	0.37487	0
NCIH2110	lung	0.26676	0.14488	0.15937	1	1	0	0	1	0	2.0385	1	-2.1146	1
SKNBE2	autonomic_ganglia	0.32075	0.13998	0.51114	1	1	1	1	0	0	-1.0753	0	-0.40474	0
NCIH2126	lung	0.95289	0.72882	0.58418	1	1	1	0	1	0	-0.46629	0	-1.4444	0
NCIH2170	lung	0.31232	0.043461	0.054319	1	0	0	0	1	0	-0.74995	0	-2.089	1
SKNEP1	bone	0.22158	0.068799	0.10692	0	0	0	1	0	0	-0.9162	0	0.48272	0
SKNFI	autonomic_ganglia	0.11587	0.095035	0.074027	0	0	0	1	0	0	-0.67995	0	-1.0817	0
NCIH2347	lung	0.086849	0.12907	0.17111	0	0	0	0	1	0	-0.21853	0	0	0
SKOV3	ovary	0.41932	0.25744	0.65182	1	1	1	1	0	1	0.12417	0	1.5418	0
SKPNDW	bone	0.046378	0.03125	0.03125	0	0	0	1	0	0	0	0	0	0
SKUT1	soft_tissue	0.19574	0.091726	0.12928	0	0	0	1	0	1	-0.38642	0	1.0732	0
NCIH2444	lung	0.17842	0.096924	0.14646	0	0	0	0	1	0	-0.46247	0	-1.7038	1
SNB75	central_nervous_system	0.16114	0.03125	0.11872	0	0	0	1	0	0	-0.56637	0	0	0
NCIH292	lung	0.44723	0.29194	0.28664	1	1	1	0	1	0	-0.70328	0	-0.61676	0
SNU1079	biliary_tract	0.18621	0.50712	0.83882	0	1	1	1	0	0	0	0	0	0
SNU1105	central_nervous_system	0.11771	0.21225	0.46833	0	1	1	1	0	0	-0.17478	0	0	0
NCIH322	lung	0.38049	0.31265	0.36761	1	1	1	0	1	0	-0.25737	0	-1.9636	1
NCIH358	lung	0.53802	0.36257	0.27662	1	1	1	0	1	0	-0.80321	0	0.26563	0
NCIH441	lung	0.39365	0.060336	0.23914	1	0	1	0	1	0	0	0	0	0
NCIH596	lung	0.38343	0.14436	0.2495	1	1	1	0	1	0	0.63541	0	0	0
SNU182	liver	0.051008	0.0313	0.03125	0	0	0	1	0	0	0	0	0.13105	0
SNU201	central_nervous_system	0.15731	0.12395	0.054202	0	0	0	1	0	0	0	0	0.21028	0
NCIH647	lung	0.21633	0.1532	0.20901	0	1	1	0	1	0	-0.52435	0	0.24613	0
NCIH727	lung	0.16652	0.072428	0.27846	0	0	1	0	1	0	-0.63831	0	0	0
SNU398	liver	0.085708	0.03125	0.060472	0	0	0	1	0	0	2.4179	1	0.43732	0
SNU410	pancreas	0.63771	0.49792	0.49955	1	1	1	1	0	0	0	0	0	0
NCIH747	large_intestine	0.35801	0.35798	0.53017	1	1	1	0	1	0	-0.77869	0	1.1945	0
SNU423	liver	0.32986	0.1397	0.10858	1	1	0	1	0	0	-0.34904	0	-0.67177	0
NCIN87	stomach	0.23788	0.18616	0.25278	0	1	1	0	1	0	-1.1367	0	0.19419	0
NIHOVCAR3	ovary	0.19815	0.03518	0.031255	0	0	0	0	1	0	0	0	0	0
SNU449	liver	0.18705	0.12976	0.14125	0	0	0	1	0	0	-0.0093763	0	0.55979	0
SNU46	upper_aerodigestive_tract	0.21242	0.058214	0.10205	0	0	0	1	0	0	-0.18053	0	-0.35968	0
SNU489	central_nervous_system	0.03125	0.047808	0.090148	0	0	0	1	0	0	0	0	0	0
NUGC3	stomach	0.24943	0.41118	0.17595	1	1	0	0	1	1	-1.1158	0	0.83533	0
NUGC4	stomach	0.4644	0.13616	0.14146	1	1	0	0	1	0	0.20619	0	0.49785	0
OAW28	ovary	0.14842	0.13511	0.17525	0	0	0	0	1	0	-0.4701	0	0.06056	0
SNU668	stomach	0.5163	0.32166	0.38184	1	1	1	1	0	0	0	0	0.0673	0
OE19	oesophagus	0.15206	0.047445	0.031256	0	0	0	0	1	0	1.9563	1	0.81678	0
OE21	oesophagus	0.21995	0.083427	0.0754	0	0	0	0	1	0	-0.45087	0	0.29823	0
OE33	oesophagus	0.32299	0.33872	0.43949	1	1	1	0	1	0	-0.11247	0	0.65792	0
ONCODG1	ovary	0.055582	0.039468	0.031261	0	0	0	0	1	0	-0.60595	0	-1.0124	0
OUMS23	large_intestine	0.53739	0.41716	0.36767	1	1	1	0	1	0	-0.59294	0	-1.8666	1
SNU685	endometrium	0.088343	0.035752	0.051142	0	0	0	1	0	0	-0.87091	0	-0.31636	0
OV90	ovary	0.2047	0.1875	0.37349	0	1	1	0	1	0	0.095408	0	-0.30579	0
SNU738	central_nervous_system	0.43577	0.40703	0.11634	1	1	0	1	0	0	0	0	0	0
OVCAR4	ovary	0.68856	0.16945	0.31532	1	1	1	0	1	0	-0.46438	0	0	0
OVISE	ovary	0.31008	0.23126	0.37099	1	1	1	0	1	0	-0.37005	0	-0.773	0
OVKATE	ovary	0.21914	0.090338	0.031259	0	0	0	0	1	0	0.48882	0	0	0
SNU761	liver	0.1293	0.03914	0.055582	0	0	0	1	0	0	-0.055953	0	-0.89677	0
PANC0203	pancreas	0.37529	0.10985	0.2751	1	0	1	0	1	0	0.88497	0	0.49406	0
SNU878	liver	0.091728	0.13491	0.11924	0	0	0	1	0	0	0	0	0	0
PANC0327	pancreas	0.35102	0.41834	0.39382	1	1	1	0	1	0	-1.4865	0	1.3672	0
PANC0403	pancreas	0.49278	0.13828	0.41853	1	1	1	0	1	0	-0.82917	0	0.52074	0
SNU886	liver	0.5805	0.13911	0.26578	1	1	1	1	0	0	0	0	0.039919	0
PANC0504	pancreas	0.25371	0.068392	0.37116	1	0	1	0	1	0	0	0	-0.18691	0
SUIT2	pancreas	0.33396	0.15834	0.21337	1	1	1	1	0	0	0.97653	0	0.64422	0
SW1088	central_nervous_system	0.62776	0.039292	0.03125	1	0	0	1	0	0	-0.35831	0	0	0
SW1271	lung	0.27076	0.19442	0.068958	1	1	0	1	0	0	0.44776	0	-0.089931	0
SW1353	bone	0.23936	0.38463	0.29898	0	1	1	1	0	0	-0.61624	0	-0.48791	0
PANC0813	pancreas	0.59223	0.48824	0.56312	1	1	1	0	1	0	1.9025	1	-1.6366	0
PANC1005	pancreas	0.36294	0.37236	0.67843	1	1	1	0	1	0	-1.0001	0	1.5286	0
PATU8902	pancreas	0.40819	0.5401	0.62679	1	1	1	0	1	0	-0.1862	0	0.76993	0
SW1573	lung	0.25769	0.08422	0.089683	1	0	0	1	0	0	1.1322	1	0.22076	0
PATU8988S	pancreas	0.22857	0.070866	0.10681	0	0	0	0	1	0	2.2972	1	0.9747	0
PC14	lung	0.20416	0.12119	0.25168	0	0	1	0	1	0	-1.1691	0	-0.99548	0
SW1710	urinary_tract	0.083243	0.095203	0.09393	0	0	0	1	0	0	1.1121	1	0.69121	0
SW1783	central_nervous_system	0.053212	0.041178	0.2629	0	0	1	1	0	0	0	0	0	0
PC3	prostate	0.63548	0.11794	0.17144	1	0	0	0	1	0	-0.49914	0	0.62643	0
SW1990	pancreas	0.43759	0.39984	0.34005	1	1	1	1	0	0	-0.091998	0	0.61773	0
PECAPJ15	upper_aerodigestive_tract	0.54568	0.34168	0.44514	1	1	1	0	1	0	-0.42857	0	1.0224	0
SW579	thyroid	0.070478	0.11145	0.20025	0	0	0	1	0	0	0	0	0	0
SW620	large_intestine	0.059842	0.03125	0.069832	0	0	0	1	0	0	2.9038	1	0.75878	0
PECAPJ41CLONED2	upper_aerodigestive_tract	0.2808	0.391	0.28784	1	1	1	0	1	0	-0.49124	0	1.5024	0
PECAPJ49	upper_aerodigestive_tract	0.45746	0.15729	0.27182	1	1	1	0	1	0	-0.48156	0	1.4027	0
PK1	pancreas	0.41098	0.28199	0.38413	1	1	1	0	1	0	0.62006	0	0.35445	0
T24	urinary_tract	0.051591	0.097756	0.3588	0	0	1	1	0	0	-0.29972	0	0.19961	0
PK59	pancreas	0.15471	0.085222	0.20636	0	0	1	0	1	0	-0.74446	0	-1.2275	0
T98G	central_nervous_system	0.17235	0.059097	0.11056	0	0	0	1	0	0	-0.51995	0	1.5552	0
TCCPAN2	pancreas	0.27931	0.27439	0.33536	1	1	1	1	0	0	1.1935	1	0.72139	0
QGP1	pancreas	0.17243	0.20454	0.14372	0	1	0	0	1	0	0.032341	0	-0.37078	0
TCCSUP	urinary_tract	0.34387	0.19169	0.36892	1	1	1	1	0	0	-0.4243	0	0.59232	0
TE8	oesophagus	0.1095	0.083798	0.078588	0	0	0	1	0	0	-0.72325	0	-1.4651	0
TM31	central_nervous_system	0.16437	0.08173	0.2445	0	0	1	1	0	0	0	0	0	0
RCM1	large_intestine	0.47587	0.27062	0.47437	1	1	1	0	1	0	-0.57484	0	1.2045	0
TM87	soft_tissue	0.17023	0.049479	0.04287	0	0	0	1	0	0	2.3874	1	-1.8192	1
RERFLCAD1	lung	0.76278	0.18819	0.31573	1	1	1	0	1	0	0	0	0	0
RERFLCAD2	lung	0.16858	0.12523	0.33795	0	0	1	0	1	0	-0.58981	0	-1.4035	0
RERFLCKJ	lung	0.57621	0.11041	0.17209	1	0	0	0	1	0	0	0	0	0
RL952	endometrium	0.26611	0.064521	0.083257	1	0	0	0	1	1	2.736	1	0.34611	0
RMGI	ovary	0.5614	0.28993	0.39468	1	1	1	0	1	0	-0.38379	0	-0.1153	0
RMUGS	ovary	0.1693	0.20135	0.19497	0	1	0	0	1	0	0	0	-0.94548	0
RT112	urinary_tract	0.19386	0.034576	0.2033	0	0	1	0	1	0	-1.4721	0	0.28448	0
SCABER	urinary_tract	0.27625	0.20833	0.33127	1	1	1	0	1	0	-1.3106	0	1.4895	0
SCC25	upper_aerodigestive_tract	0.33186	0.17226	0.20924	1	1	1	0	1	0	-0.40862	0	0	0
SKCO1	large_intestine	0.20989	0.079828	0.23794	0	0	1	0	1	0	0	0	0	0
SNGM	endometrium	0.20746	0.14715	0.25871	0	1	1	0	1	1	0.84955	0	-1.6589	1
TOV112D	ovary	0.077159	0.039813	0.085865	0	0	0	1	0	0	2.7691	1	0.66255	0
TOV21G	ovary	0.037941	0.13871	0.074894	0	1	0	1	0	1	-0.49517	0	0.39479	0
TT2609C02	thyroid	0.24957	0.12174	0.17749	1	0	0	1	0	0	0.79768	0	0.74246	0
SNU1041	upper_aerodigestive_tract	0.37505	0.31	0.56737	1	1	1	0	1	0	-0.28769	0	-0.42793	0
TTC1240	soft_tissue	0.24367	0.041766	0.083648	0	0	0	1	0	0	0	0	0	0
SNU1066	upper_aerodigestive_tract	0.13217	0.12356	0.15694	0	0	0	0	1	0	1.9293	1	0.71115	0
SNU1076	upper_aerodigestive_tract	0.38736	0.18868	0.34597	1	1	1	0	1	0	-0.33601	0	0.15481	0
SNU1077	endometrium	0.31429	0.06909	0.12763	1	0	0	0	1	0	-0.098915	0	-0.010802	0
SNU1196	biliary_tract	0.46767	0.069432	0.41601	1	0	1	0	1	0	-0.55562	0	-1.2848	0
SNU1214	upper_aerodigestive_tract	0.35626	0.12586	0.22402	1	0	1	0	1	0	-0.29176	0	0	0
TTC549	soft_tissue	0.054259	0.031252	0.044765	0	0	0	1	0	0	0.0069866	0	0	0
SNU213	pancreas	0.14231	0.076547	0.29906	0	0	1	0	1	0	-0.79695	0	-0.57683	0
SNU216	stomach	0.45359	0.15672	0.43901	1	1	1	0	1	0	-0.033129	0	0.79289	0
TTC642	soft_tissue	0.16274	0.043034	0.059834	0	0	0	1	0	0	0	0	0	0
SNU245	biliary_tract	0.46899	0.40861	0.30784	1	1	1	0	1	0	-0.56092	0	-0.0033299	0
SNU308	biliary_tract	0.56638	0.12882	0.21379	1	0	1	0	1	0	-0.39158	0	0	0
SNU407	large_intestine	0.41436	0.16294	0.22598	1	1	1	0	1	1	-0.92411	0	0.4525	0
SNU601	stomach	0.22908	0.031253	0.039735	0	0	0	0	1	0	-1.4578	0	0	0
SNU61	large_intestine	0.175	0.23241	0.16546	0	1	0	0	1	0	-0.82254	0	1.039	0
SNU719	stomach	0.24717	0.12078	0.33402	0	0	1	0	1	0	0.36953	0	0.50926	0
TTC709	soft_tissue	0.14572	0.084989	0.13862	0	0	0	1	0	0	2.5424	1	-1.8906	1
SNU8	ovary	0.03125	0.057827	0.17172	0	0	0	0	1	0	-0.63073	0	-1.7725	1
TUHR4TKB	kidney	0.056736	0.031254	0.059157	0	0	0	1	0	0	0	0	0	0
TYKNU	ovary	0.15163	0.047163	0.092143	0	0	0	1	0	0	-1.0558	0	-1.6146	0
U118MG	central_nervous_system	0.11518	0.11889	0.32236	0	0	1	1	0	0	-0.53345	0	0	0
SNU81	large_intestine	0.18228	0.039155	0.03125	0	0	0	0	1	0	2.0664	1	-2.4652	1
SNU840	ovary	0.44272	0.19654	0.23324	1	1	1	0	1	0	0.42111	0	-1.0468	0
U251MG	central_nervous_system	0.22276	0.18781	0.051291	0	1	0	1	0	0	-0.6542	0	1.1748	0
U2OS	bone	0.067465	0.24431	0.13445	0	1	0	1	0	0	-0.6711	0	-1.0994	0
SNU869	biliary_tract	0.38926	0.13968	0.33763	1	1	1	0	1	0	-0.39907	0	0	0
SNU899	upper_aerodigestive_tract	0.19608	0.51632	0.40565	0	1	1	0	1	0	-0.50317	0	0	0
U87MG	central_nervous_system	0.10108	0.14841	0.32098	0	1	1	1	0	0	-0.20273	0	-1.7265	1
SNUC2A	large_intestine	0.31017	0.21853	0.24576	1	1	1	0	1	1	0.35699	0	-1.1353	0
SNUC4	large_intestine	0.37537	0.16294	0.18593	1	1	0	0	1	1	-0.98244	0	-0.59002	0
SNUC5	large_intestine	0.14133	0.063783	0.12275	0	0	0	0	1	1	-0.063359	0	-2.219	1
SQ1	lung	0.70915	0.44198	0.34674	1	1	1	0	1	0	0	0	0	0
STM9101	soft_tissue	0.21229	0.031254	0.058812	0	0	0	0	1	0	0	0	0	0
SU8686	pancreas	0.32895	0.39338	0.51237	1	1	1	0	1	0	-0.28355	0	0.018629	0
UACC257	skin	0.084712	0.1995	0.19628	0	1	0	1	0	0	-0.41094	0	-0.22495	0
SW1116	large_intestine	0.36829	0.14231	0.25622	1	1	1	0	1	0	-0.94846	0	0	0
SW480	large_intestine	0.14512	0.058293	0.074601	0	0	0	0	1	0	2.2676	1	1.146	0
UACC62	skin	0.5836	0.26587	0.45271	1	1	1	1	0	0	-0.19179	0	0.032895	0
SW780	urinary_tract	0.75732	0.14363	0.036771	1	1	0	0	1	0	0	0	0	0
UO31	kidney	0.40123	0.12219	0.18164	1	0	0	1	0	0	1.0335	0	0.38688	0
SW837	large_intestine	0.31296	0.2064	0.26466	1	1	1	0	1	0	-0.78469	0	1.3103	0
SW948	large_intestine	0.093869	0.048257	0.1934	0	0	0	0	1	0	-0.34263	0	-0.71437	0
T3M10	lung	0.03125	0.050684	0.089809	0	0	0	0	1	0	-0.77277	0	0.47894	0
VMRCRCW	kidney	0.062209	0.045087	0.040254	0	0	0	1	0	0	1.5732	1	1.4269	0
VMRCRCZ	kidney	0.14052	0.03125	0.065408	0	0	0	1	0	0	0	0	-2.0132	1
T47D	breast	0.43959	0.12511	0.10816	1	0	0	0	1	0	-0.43893	0	1.3441	0
WM1799	skin	0.52769	0.10219	0.15763	1	0	0	1	0	0	-1.0091	0	0.24114	0
WM2664	skin	0.21792	0.31669	0.28433	0	1	1	1	0	0	0	0	0	0
TE1	oesophagus	0.048518	0.053691	0.034514	0	0	0	0	1	0	-0.4039	0	0.21554	0
WM793	skin	0.2195	0.095213	0.2025	0	0	0	1	0	0	-0.50115	0	-0.16845	0
TE10	oesophagus	0.16556	0.15784	0.12751	0	1	0	0	1	0	-0.32571	0	0.22592	0
TE11	oesophagus	0.4317	0.29224	0.34482	1	1	1	0	1	0	0.17451	0	0.90143	0
TE14	oesophagus	0.49088	0.14611	0.22803	1	1	1	0	1	0	2.6381	1	1.2456	0
TE6	oesophagus	0.2672	0.092193	0.1588	1	0	0	0	1	0	-0.42644	0	0	0
TE9	oesophagus	0.23877	0.071255	0.14525	0	0	0	0	1	0	0.18494	0	1.4516	0
WM88	skin	0.29893	0.20405	0.74376	1	1	1	1	0	0	0	0	0	0
WM983B	skin	0.35527	0.27775	0.28283	1	1	1	1	0	0	-1.0368	0	0.29368	0
YD8	upper_aerodigestive_tract	0.25786	0.11164	0.18561	1	0	0	1	0	0	-0.30743	0	1.1272	0
TEN	endometrium	0.15812	0.059723	0.096753	0	0	0	0	1	0	0.32018	0	0.62207	0
TT	thyroid	0.065892	0.16078	0.15582	0	1	0	0	1	0	-0.20807	0	0.88089	0
UBLC1	urinary_tract	0.32536	0.23955	0.19827	1	1	0	0	1	0	-0.58369	0	0.54008	0
UMUC1	urinary_tract	0.35543	0.054287	0.10517	1	0	0	0	1	0	-0.56362	0	0	0
VMCUB1	urinary_tract	0.38382	0.14434	0.2205	1	1	1	0	1	0	-1.0182	0	-0.962	0
YH13	central_nervous_system	0.26997	0.081566	0.30945	1	0	1	1	0	0	0	0	0	0
YAPC	pancreas	0.76424	0.41609	0.45537	1	1	1	0	1	0	-0.32216	0	1.4147	0
YD10B	upper_aerodigestive_tract	0.28625	0.14101	0.22373	1	1	1	0	1	0	2.209	1	1.3214	0
YD15	salivary_gland	0.21862	0.14636	0.29753	0	1	1	0	1	0	1.4557	1	0.88766	0
YD38	upper_aerodigestive_tract	0.43149	0.27746	0.4791	1	1	1	0	1	0	1.0922	1	0.90842	0
ZR751	breast	0.49463	0.32019	0.45811	1	1	1	0	1	0	-0.54545	0	-1.7958	1
YKG1	central_nervous_system	0.089531	0.067147	0.094831	0	0	0	1	0	0	-0.56915	0	0.54399	0

## Sheet: Table S3 Mutations-Globa
Genes	24hr subgroup with enriched mutations	24hr P-value	24hr adjusted P-value	48hr subgroup with enriched mutations	48hr P-value	48hr adjusted P-value	72hr subgroup with enriched mutations	72hr P-value	72hr adjusted P-value
CDKN2A	Resistant	0.00069	0.58428	Resistant	0.00158	0.54306	Resistant	0.00055	0.56011
PTPN13	Sensitive	0.01798	0.58428	Sensitive	0.00137	0.54306	Sensitive	0.00137	0.56011
ZNF292	Sensitive	0.07511	0.58428	Sensitive	0.00044	0.54306	Sensitive	0.00198	0.56011
EHMT1	Sensitive	0.12402	0.58428	Sensitive	0.00111	0.54306	Sensitive	0.00062	0.56011
KRAS	Resistant	0.0055	0.58428	Resistant	0.04852	0.54306	Resistant	0.00066	0.56011
B2M	Sensitive	0.01371	0.58428	Sensitive	0.00767	0.54306	Sensitive	0.0043	0.56011
MET	Sensitive	0.19751	0.58428	Sensitive	0.00137	0.54306	Sensitive	0.00242	0.56011
WFS1	Sensitive	0.05691	0.58428	Sensitive	0.00623	0.54306	Sensitive	0.00242	0.56011
EIF4G1	Sensitive	0.03269	0.58428	Sensitive	0.01795	0.54306	Sensitive	0.00343	0.56011
NLN	Sensitive	0.01371	0.58428	Sensitive	0.01371	0.54306	Sensitive	0.01371	0.56011
VBP1	Sensitive	0.02468	0.58428	Sensitive	0.00767	0.54306	Sensitive	0.01371	0.56011
MZF1	Sensitive	0.02468	0.58428	Sensitive	0.00767	0.54306	Sensitive	0.01371	0.56011
CHD9	Sensitive	0.0981	0.58428	Sensitive	0.0043	0.54306	Sensitive	0.00767	0.56011
TCOF1	Sensitive	0.05523	0.58428	Sensitive	0.00767	0.54306	Sensitive	0.00767	0.56011
TTLL3	Sensitive	0.01371	0.58428	Sensitive	0.01371	0.54306	Sensitive	0.02468	0.56011
PLXND1	Sensitive	0.1585	0.58428	Sensitive	0.00322	0.54306	Sensitive	0.01083	0.56011
WDR90	Sensitive	0.09144	0.58428	Sensitive	0.00626	0.54306	Sensitive	0.01006	0.56011
OBSCN	Sensitive	0.01903	0.58428	Sensitive	0.01903	0.54306	Sensitive	0.01903	0.56011
GOLGA4	Sensitive	0.03116	0.58428	Sensitive	0.03213	0.54306	Sensitive	0.00767	0.56011
VPRBP	Sensitive	0.04488	0.58428	Sensitive	0.01371	0.54306	Sensitive	0.01371	0.56011
IWS1	Sensitive	0.02468	0.58428	Sensitive	0.02468	0.54306	Sensitive	0.02468	0.56011
QSOX2	Sensitive	0.02468	0.58428	Sensitive	0.02468	0.54306	Sensitive	0.02468	0.56011
MID1	Sensitive	0.02468	0.58428	Sensitive	0.09906	0.54306	Sensitive	0.00767	0.56011
MTSS1L	Sensitive	0.01371	0.58428	Sensitive	0.18139	0.54306	Sensitive	0.00767	0.56011
CUL7	Sensitive	0.03148	0.58428	Sensitive	0.0907	0.54306	Sensitive	0.00767	0.56011
ATR	Sensitive	0.25185	0.58428	Sensitive	0.01761	0.54306	Sensitive	0.00563	0.56011
SYMPK	Sensitive	0.24648	0.58428	Sensitive	0.00767	0.54306	Sensitive	0.01371	0.56011
METTL3	Sensitive	0.04488	0.58428	Sensitive	0.02468	0.54306	Sensitive	0.02468	0.56011
SART1	Resistant	0.01371	0.58428	Resistant	0.04488	0.54306	Resistant	0.04488	0.56011
MRC2	Sensitive	0.02468	0.58428	Sensitive	0.08297	0.54306	Sensitive	0.01371	0.56011
SMAD4	Resistant	0.06559	0.58428	Resistant	0.08562	0.54306	Resistant	0.00526	0.56011
C15orf39	Sensitive	0.05579	0.58428	Sensitive	0.01779	0.54306	Sensitive	0.03148	0.56011
BRCA2	Sensitive	0.01371	0.58428	Sensitive	0.01371	0.54306	Sensitive	0.17476	0.56011
ARHGAP19	Sensitive	0.17476	0.58428	Sensitive	0.02468	0.54306	Sensitive	0.00767	0.56011
ESPL1	Sensitive	0.05663	0.58428	Sensitive	0.24471	0.54306	Sensitive	0.00242	0.56011
DMXL2	Resistant	0.01888	0.58428	Resistant	0.09444	0.54306	Resistant	0.0194	0.56011
CAMSAP3	Sensitive	0.04488	0.58428	Sensitive	0.05806	0.54306	Sensitive	0.01371	0.56011
NOTCH3	Sensitive	0.01913	0.58428	Sensitive	0.01913	0.54306	Sensitive	0.10297	0.56011
TSPYL2	Sensitive	0.04488	0.58428	Sensitive	0.04488	0.54306	Sensitive	0.02468	0.56011
PLEKHA5	Sensitive	0.04488	0.58428	Sensitive	0.02468	0.54306	Sensitive	0.04488	0.56011
ZNF880	Sensitive	0.08297	0.58428	Sensitive	0.02468	0.54306	Sensitive	0.02468	0.56011
SLMAP	Sensitive	0.08297	0.58428	Sensitive	0.02468	0.54306	Sensitive	0.02468	0.56011
C22orf29	Sensitive	0.02468	0.58428	Sensitive	0.08297	0.54306	Sensitive	0.02468	0.56011
AQR	Sensitive	0.07904	0.58428	Sensitive	0.19079	0.54306	Sensitive	0.00356	0.56011
POTEE	Sensitive	0.37081	0.67304	Sensitive	0.06616	0.54306	Sensitive	0.00221	0.56011
TMEM131	Sensitive	0.09144	0.58428	Sensitive	0.03326	0.54306	Sensitive	0.01855	0.56011
POLG	Sensitive	0.01371	0.58428	Sensitive	0.1764	0.54306	Sensitive	0.02468	0.56011
ATP6V0A2	Sensitive	0.318	0.58428	Sensitive	0.01371	0.54306	Sensitive	0.01371	0.56011
FAM217B	Sensitive	0.32079	0.58428	Sensitive	0.00767	0.54306	Sensitive	0.02468	0.56011
VPS18	Sensitive	0.08297	0.58428	Sensitive	0.05523	0.54306	Sensitive	0.01371	0.56011
ZNF326	Resistant	0.0043	0.58428	Resistant	0.57109	0.80493	Resistant	0.03355	0.56011
GBA2	Sensitive	0.05864	0.58428	Sensitive	0.01371	0.54306	Sensitive	0.10297	0.56011
TAF5L	Sensitive	0.15374	0.58428	Sensitive	0.01061	0.54306	Sensitive	0.05346	0.56011
ZMYM5	Sensitive	0.04488	0.58428	Sensitive	0.04488	0.54306	Sensitive	0.04488	0.56011
SBF2	Resistant	0.04488	0.58428	Resistant	0.04488	0.54306	Resistant	0.04488	0.56011
SNTB1	Sensitive	0.08297	0.58428	Sensitive	0.02468	0.54306	Sensitive	0.04488	0.56011
RALBP1	Sensitive	0.08297	0.58428	Sensitive	0.02468	0.54306	Sensitive	0.04488	0.56011
ZNF253	Sensitive	0.08297	0.58428	Sensitive	0.02468	0.54306	Sensitive	0.04488	0.56011
TRIM5	Sensitive	0.08297	0.58428	Sensitive	0.02468	0.54306	Sensitive	0.04488	0.56011
KARS	Sensitive	0.04488	0.58428	Sensitive	0.02468	0.54306	Sensitive	0.08297	0.56011
ARHGAP18	Sensitive	0.04488	0.58428	Sensitive	0.02468	0.54306	Sensitive	0.08297	0.56011
ASTN2	Sensitive	0.08297	0.58428	Sensitive	0.08297	0.54306	Sensitive	0.01371	0.56011
ZNF107	Sensitive	0.05635	0.58428	Sensitive	0.0567	0.54306	Sensitive	0.03279	0.56011
PLCG1	Sensitive	0.31247	0.58428	Sensitive	0.01371	0.54306	Sensitive	0.02468	0.56011
ZNF48	Sensitive	0.31247	0.58428	Sensitive	0.01371	0.54306	Sensitive	0.02468	0.56011
CEP72	Resistant	0.56036	0.85098	Resistant	0.02468	0.54306	Resistant	0.00767	0.56011
FNIP1	Sensitive	0.02468	0.58428	Sensitive	0.02468	0.54306	Sensitive	0.17805	0.56011
TAB3	Sensitive	0.17887	0.58428	Sensitive	0.02468	0.54306	Sensitive	0.02468	0.56011
DCAF5	Sensitive	0.05691	0.58428	Sensitive	0.03313	0.54306	Sensitive	0.05806	0.56011
PITPNM2	Sensitive	0.17971	0.58428	Sensitive	0.02468	0.54306	Sensitive	0.02468	0.56011
MYO9A	Sensitive	0.04488	0.58428	Sensitive	0.01371	0.54306	Sensitive	0.17805	0.56011
KDM4C	Sensitive	0.05777	0.58428	Sensitive	0.03296	0.54306	Sensitive	0.05806	0.56011
VPS8	Sensitive	0.04488	0.58428	Sensitive	0.02468	0.54306	Sensitive	0.10002	0.56011
KRT6C	Resistant	0.05748	0.58428	Resistant	0.00767	0.54306	Resistant	0.25185	0.56011
PCF11	Resistant	0.01371	0.58428	Resistant	0.04488	0.54306	Resistant	0.18139	0.56011
REPIN1	Sensitive	0.02468	0.58428	Sensitive	0.05691	0.54306	Sensitive	0.08297	0.56011
BRAF	Resistant	0.26432	0.58428	Resistant	0.00671	0.54306	Resistant	0.06915	0.56011
POLRMT	Sensitive	0.08852	0.58428	Sensitive	0.13552	0.54306	Sensitive	0.01028	0.56011
DOCK6	Sensitive	0.01371	0.58428	Sensitive	0.40421	0.67926	Sensitive	0.02468	0.56011
ARHGAP5	Sensitive	0.02468	0.58428	Sensitive	0.0981	0.54306	Sensitive	0.05691	0.56011
BTN3A1	Sensitive	0.00767	0.58428	Sensitive	0.17476	0.54306	Sensitive	0.10297	0.56011
FLII	Sensitive	0.04488	0.58428	Sensitive	0.05579	0.54306	Sensitive	0.05579	0.56011
SOCS5	Sensitive	0.17805	0.58428	Sensitive	0.10297	0.54306	Sensitive	0.00767	0.56011
LAMA5	Sensitive	0.05297	0.58428	Sensitive	0.08719	0.54306	Sensitive	0.03152	0.56011
STK10	Sensitive	0.02468	0.58428	Sensitive	0.25185	0.54306	Sensitive	0.02468	0.56011
ADAM10	Sensitive	0.04488	0.58428	Sensitive	0.04488	0.54306	Sensitive	0.08297	0.56011
CSNK1A1	Resistant	0.08297	0.58428	Resistant	0.04488	0.54306	Resistant	0.04488	0.56011
DHX9	Sensitive	0.08297	0.58428	Sensitive	0.04488	0.54306	Sensitive	0.04488	0.56011
FGFR1	Sensitive	0.08297	0.58428	Sensitive	0.04488	0.54306	Sensitive	0.04488	0.56011
LEPR	Sensitive	0.04488	0.58428	Sensitive	0.08297	0.54306	Sensitive	0.04488	0.56011
CD46	Sensitive	0.04488	0.58428	Sensitive	0.04488	0.54306	Sensitive	0.08297	0.56011
THBS3	Sensitive	0.08297	0.58428	Sensitive	0.04488	0.54306	Sensitive	0.04488	0.56011
RIPK2	Sensitive	0.04488	0.58428	Sensitive	0.08297	0.54306	Sensitive	0.04488	0.56011
CHEK2	Sensitive	0.08297	0.58428	Sensitive	0.04488	0.54306	Sensitive	0.04488	0.56011
HPS6	Sensitive	0.08297	0.58428	Sensitive	0.04488	0.54306	Sensitive	0.04488	0.56011
GOLGA2	Sensitive	0.01779	0.58428	Sensitive	0.16093	0.54306	Sensitive	0.05864	0.56011
TSKU	Sensitive	0.08297	0.58428	Sensitive	0.02468	0.54306	Sensitive	0.08297	0.56011
VPS16	Sensitive	0.08297	0.58428	Sensitive	0.08297	0.54306	Sensitive	0.02468	0.56011
SNIP1	Sensitive	0.08297	0.58428	Sensitive	0.08297	0.54306	Sensitive	0.02468	0.56011
ATRX	Sensitive	0.00558	0.58428	Sensitive	0.09877	0.54306	Sensitive	0.31311	0.56011
TMEM67	Sensitive	0.15789	0.58428	Sensitive	0.04488	0.54306	Sensitive	0.02468	0.56011
NUMA1	Sensitive	0.48523	0.84963	Sensitive	0.03444	0.54306	Sensitive	0.01095	0.56011
C8orf76	Sensitive	0.04488	0.58428	Sensitive	0.02468	0.54306	Sensitive	0.1764	0.56011
TTC28	Sensitive	0.01371	0.58428	Sensitive	0.3194	0.54306	Sensitive	0.04488	0.56011
ACSL4	Sensitive	0.17805	0.58428	Sensitive	0.04488	0.54306	Sensitive	0.02468	0.56011
CLOCK	Sensitive	0.05523	0.58428	Sensitive	0.02468	0.54306	Sensitive	0.14908	0.56011
SMC2	Sensitive	0.08297	0.58428	Sensitive	0.02468	0.54306	Sensitive	0.101	0.56011
RAB3IP	Resistant	0.01874	0.58428	Resistant	0.19878	0.54306	Resistant	0.05635	0.56011
PWWP2A	Sensitive	0.15789	0.58428	Sensitive	0.05691	0.54306	Sensitive	0.02468	0.56011
PCNX	Sensitive	0.40449	0.7302	Sensitive	0.03189	0.54306	Sensitive	0.0181	0.56011
FYCO1	Sensitive	0.41087	0.73569	Sensitive	0.03148	0.54306	Sensitive	0.01817	0.56011
PHF2	Sensitive	0.17476	0.58428	Sensitive	0.02468	0.54306	Sensitive	0.05523	0.56011
ABL1	Sensitive	0.01371	0.58428	Sensitive	0.71438	0.95424	Sensitive	0.02468	0.56011
REXO1	Sensitive	0.99313	1	Sensitive	0.01798	0.54306	Sensitive	0.01371	0.56011
SPRED2	Sensitive	0.02468	0.58428	Sensitive	0.05806	0.54306	Sensitive	0.17971	0.56011
B4GALT1	Sensitive	0.02468	0.58428	Sensitive	0.24471	0.54306	Sensitive	0.04488	0.56011
SAFB2	Sensitive	0.15492	0.58428	Sensitive	0.03246	0.54306	Sensitive	0.05691	0.56011
ZNF41	Sensitive	0.08297	0.58428	Sensitive	0.08297	0.54306	Sensitive	0.04488	0.56011
IMPACT	Sensitive	0.08297	0.58428	Sensitive	0.08297	0.54306	Sensitive	0.04488	0.56011
MED25	Resistant	0.08297	0.58428	Resistant	0.08297	0.54306	Resistant	0.04488	0.56011
CBX2	Sensitive	0.08297	0.58428	Sensitive	0.08297	0.54306	Sensitive	0.04488	0.56011
XIAP	Sensitive	0.08297	0.58428	Sensitive	0.04488	0.54306	Sensitive	0.08297	0.56011
IRF1	Sensitive	0.08297	0.58428	Sensitive	0.04488	0.54306	Sensitive	0.08297	0.56011
NME4	Resistant	0.04488	0.58428	Resistant	0.08297	0.54306	Resistant	0.08297	0.56011
TBX3	Sensitive	0.04488	0.58428	Sensitive	0.08297	0.54306	Sensitive	0.08297	0.56011
BAP1	Sensitive	0.08297	0.58428	Sensitive	0.04488	0.54306	Sensitive	0.08297	0.56011
RABL6	Sensitive	0.08297	0.58428	Sensitive	0.04488	0.54306	Sensitive	0.08297	0.56011
FAM110A	Sensitive	0.04488	0.58428	Sensitive	0.08297	0.54306	Sensitive	0.08297	0.56011
ZNF616	Sensitive	0.08297	0.58428	Sensitive	0.04488	0.54306	Sensitive	0.08297	0.56011
ZNF438	Sensitive	0.08297	0.58428	Sensitive	0.04488	0.54306	Sensitive	0.08297	0.56011
C6orf132	Sensitive	0.08297	0.58428	Sensitive	0.04488	0.54306	Sensitive	0.08297	0.56011
SKA3	Resistant	0.15789	0.58428	Resistant	0.04488	0.54306	Resistant	0.04488	0.56011
GAS6	Sensitive	0.15789	0.58428	Sensitive	0.04488	0.54306	Sensitive	0.04488	0.56011
CLIP1	Sensitive	0.15789	0.58428	Sensitive	0.04488	0.54306	Sensitive	0.04488	0.56011
TLE2	Sensitive	0.04488	0.58428	Sensitive	0.04488	0.54306	Sensitive	0.15789	0.56011
NUAK1	Sensitive	0.15789	0.58428	Sensitive	0.04488	0.54306	Sensitive	0.04488	0.56011
FANCI	Sensitive	0.15789	0.58428	Sensitive	0.04488	0.54306	Sensitive	0.04488	0.56011
ATG9A	Sensitive	0.15789	0.58428	Sensitive	0.04488	0.54306	Sensitive	0.04488	0.56011
EVI5L	Resistant	0.15789	0.58428	Resistant	0.04488	0.54306	Resistant	0.04488	0.56011
TUBG2	Sensitive	0.15789	0.58428	Sensitive	0.02468	0.54306	Sensitive	0.08297	0.56011
SBNO2	Sensitive	0.24648	0.58428	Sensitive	0.10002	0.54306	Sensitive	0.01371	0.56011
GPR125	Sensitive	0.12402	0.58428	Sensitive	0.01072	0.54306	Sensitive	0.25547	0.56011
MSH2	Sensitive	0.56036	0.85098	Sensitive	0.02468	0.54306	Sensitive	0.02468	0.56011
ZFP90	Resistant	0.56036	0.85098	Resistant	0.02468	0.54306	Resistant	0.02468	0.56011
ZBED4	Resistant	0.56706	0.85098	Resistant	0.02468	0.54306	Resistant	0.02468	0.56011
PIKFYVE	Resistant	0.5693	0.85098	Resistant	0.02468	0.54306	Resistant	0.02468	0.56011
C11orf30	Sensitive	0.01371	0.58428	Sensitive	0.10002	0.54306	Sensitive	0.25547	0.56011
SEC31B	Sensitive	0.1764	0.58428	Sensitive	0.04488	0.54306	Sensitive	0.04488	0.56011
HMCN1	Sensitive	0.02468	0.58428	Sensitive	0.32079	0.54306	Sensitive	0.04488	0.56011
STIM2	Sensitive	0.04488	0.58428	Sensitive	0.04488	0.54306	Sensitive	0.17971	0.56011
DOK1	Sensitive	0.17805	0.58428	Sensitive	0.02468	0.54306	Sensitive	0.08297	0.56011
LRIG3	Resistant	0.04488	0.58428	Resistant	0.04488	0.54306	Resistant	0.18139	0.56011
SMARCAL1	Sensitive	0.08297	0.58428	Sensitive	0.17971	0.54306	Sensitive	0.02468	0.56011
TMUB1	Sensitive	0.08297	0.58428	Sensitive	0.17971	0.54306	Sensitive	0.02468	0.56011
CENPE	Sensitive	0.01371	0.58428	Sensitive	0.05815	0.54306	Sensitive	0.48141	0.8091
CHD3	Sensitive	0.0328	0.58428	Sensitive	0.03297	0.54306	Sensitive	0.36341	0.63201
N4BP1	Sensitive	0.65844	0.95304	Sensitive	0.04488	0.54306	Sensitive	0.01371	0.56011
CELSR2	Resistant	0.69497	0.99286	Resistant	0.01913	0.54306	Resistant	0.03181	0.56011
ZBTB39	Sensitive	0.02468	0.58428	Sensitive	0.0981	0.54306	Sensitive	0.17476	0.56011
PWP2	Sensitive	0.17476	0.58428	Sensitive	0.0981	0.54306	Sensitive	0.02468	0.56011
INTS10	Sensitive	0.02468	0.58428	Sensitive	0.1764	0.54306	Sensitive	0.0981	0.56011
FRAS1	Sensitive	0.17805	0.58428	Sensitive	0.02468	0.54306	Sensitive	0.09906	0.56011
BAZ2B	Sensitive	0.10198	0.58428	Sensitive	0.02468	0.54306	Sensitive	0.17476	0.56011
DCTN1	Sensitive	0.17805	0.58428	Sensitive	0.02468	0.54306	Sensitive	0.101	0.56011
KIAA1211	Sensitive	0.40421	0.72983	Sensitive	0.02468	0.54306	Sensitive	0.04488	0.56011
ZNF646	Sensitive	0.17805	0.58428	Sensitive	0.02468	0.54306	Sensitive	0.10297	0.56011
GLYR1	Sensitive	0.32079	0.58428	Sensitive	0.02468	0.54306	Sensitive	0.05806	0.56011
RPTOR	Resistant	0.25913	0.58428	Resistant	0.05748	0.54306	Resistant	0.03116	0.56011
PLD2	Sensitive	0.25456	0.58428	Sensitive	0.05579	0.54306	Sensitive	0.03279	0.56011
MTMR9	Sensitive	0.08297	0.58428	Sensitive	0.41489	0.68755	Sensitive	0.01371	0.56011
ATF7IP	Resistant	0.01884	0.58428	Resistant	0.08297	0.54306	Resistant	0.30717	0.56011
TAF2	Sensitive	0.24648	0.58428	Sensitive	0.04488	0.54306	Sensitive	0.04488	0.56011
TIAM1	Resistant	0.65287	0.95304	Resistant	0.10002	0.54306	Resistant	0.00767	0.56011
ZNF335	Sensitive	0.46504	0.81819	Sensitive	0.01874	0.54306	Sensitive	0.05748	0.56011
BCOR	Resistant	0.77752	1	Resistant	0.00606	0.54306	Resistant	0.11648	0.56011
TONSL	Sensitive	0.05691	0.58428	Sensitive	0.01371	0.54306	Sensitive	0.70465	0.96584
COL6A1	Sensitive	0.15789	0.58428	Sensitive	0.04488	0.54306	Sensitive	0.08297	0.56011
HLA-F	Sensitive	0.15789	0.58428	Sensitive	0.08297	0.54306	Sensitive	0.04488	0.56011
KIF22	Sensitive	0.15789	0.58428	Sensitive	0.08297	0.54306	Sensitive	0.04488	0.56011
ZNF213	Sensitive	0.15789	0.58428	Sensitive	0.04488	0.54306	Sensitive	0.08297	0.56011
PSMF1	Sensitive	0.15789	0.58428	Sensitive	0.04488	0.54306	Sensitive	0.08297	0.56011
PQBP1	Sensitive	0.08297	0.58428	Sensitive	0.04488	0.54306	Sensitive	0.15789	0.56011
HMG20A	Sensitive	0.04488	0.58428	Sensitive	0.08297	0.54306	Sensitive	0.15789	0.56011
ACOT7	Sensitive	0.15789	0.58428	Sensitive	0.04488	0.54306	Sensitive	0.08297	0.56011
RRP1B	Sensitive	0.15789	0.58428	Sensitive	0.04488	0.54306	Sensitive	0.08297	0.56011
LEMD3	Sensitive	0.15789	0.58428	Sensitive	0.04488	0.54306	Sensitive	0.08297	0.56011
EML2	Sensitive	0.08297	0.58428	Sensitive	0.04488	0.54306	Sensitive	0.15789	0.56011
C14orf159	Sensitive	0.15789	0.58428	Sensitive	0.08297	0.54306	Sensitive	0.04488	0.56011
ZNF397	Sensitive	0.15789	0.58428	Sensitive	0.04488	0.54306	Sensitive	0.08297	0.56011
TUBA1C	Sensitive	0.08297	0.58428	Sensitive	0.15789	0.54306	Sensitive	0.04488	0.56011
FBXO45	Resistant	0.04488	0.58428	Resistant	0.15789	0.54306	Resistant	0.08297	0.56011
BMS1	Sensitive	0.24826	0.58428	Sensitive	0.09906	0.54306	Sensitive	0.02468	0.56011
DPP7	Sensitive	0.02468	0.58428	Sensitive	0.02468	0.54306	Resistant	1	1
TMEM104	Resistant	0.99313	1	Resistant	0.04488	0.54306	Resistant	0.01371	0.56011
ASCC2	Resistant	1	1	Resistant	0.01371	0.54306	Resistant	0.04488	0.56011
FUBP1	Sensitive	0.56036	0.85098	Sensitive	0.04488	0.54306	Sensitive	0.02468	0.56011
NUP85	Sensitive	0.56036	0.85098	Sensitive	0.04488	0.54306	Sensitive	0.02468	0.56011
PIK3R1	Sensitive	0.56482	0.85098	Sensitive	0.02468	0.54306	Sensitive	0.04488	0.56011
MYLK	Sensitive	0.09906	0.58428	Sensitive	0.02468	0.54306	Sensitive	0.2573	0.56011
PCDHGA10	Sensitive	0.04488	0.58428	Sensitive	0.04488	0.54306	Sensitive	0.31247	0.56011
DDR1	Sensitive	0.31247	0.58428	Sensitive	0.04488	0.54306	Sensitive	0.04488	0.56011
ELL	Sensitive	0.31247	0.58428	Sensitive	0.04488	0.54306	Sensitive	0.04488	0.56011
SPATA2	Resistant	0.04488	0.58428	Resistant	0.04488	0.54306	Resistant	0.31247	0.56011
CCDC142	Sensitive	0.31247	0.58428	Sensitive	0.04488	0.54306	Sensitive	0.04488	0.56011
MALT1	Sensitive	0.5693	0.85098	Sensitive	0.04488	0.54306	Sensitive	0.02468	0.56011
HEATR5B	Sensitive	0.5693	0.85098	Sensitive	0.02468	0.54306	Sensitive	0.04488	0.56011
COBL	Sensitive	0.25366	0.58428	Sensitive	0.101	0.54306	Sensitive	0.02468	0.56011
ARVCF	Sensitive	0.04488	0.58428	Sensitive	0.31523	0.54306	Sensitive	0.04488	0.56011
EFCAB14	Sensitive	0.31523	0.58428	Sensitive	0.04488	0.54306	Sensitive	0.04488	0.56011
ESRP1	Sensitive	0.31523	0.58428	Sensitive	0.04488	0.54306	Sensitive	0.04488	0.56011
UNKL	Sensitive	0.31523	0.58428	Sensitive	0.04488	0.54306	Sensitive	0.04488	0.56011
ADCK1	Sensitive	0.31247	0.58428	Sensitive	0.02468	0.54306	Sensitive	0.08297	0.56011
RBL1	Sensitive	0.318	0.58428	Sensitive	0.04488	0.54306	Sensitive	0.04488	0.56011
TPP2	Resistant	0.02468	0.58428	Resistant	0.10297	0.54306	Resistant	0.25366	0.56011
SLC7A5	Resistant	0.32008	0.58428	Resistant	0.04488	0.54306	Resistant	0.04488	0.56011
SERPINH1	Sensitive	0.31523	0.58428	Sensitive	0.02468	0.54306	Sensitive	0.08297	0.56011
VRK2	Sensitive	0.04488	0.58428	Sensitive	0.04488	0.54306	Sensitive	0.32079	0.56011
IGSF8	Resistant	0.08297	0.58428	Resistant	0.02468	0.54306	Resistant	0.318	0.56011
SART3	Sensitive	0.25366	0.58428	Sensitive	0.04488	0.54306	Sensitive	0.05748	0.56011
ZNF45	Sensitive	0.08297	0.58428	Sensitive	0.1764	0.54306	Sensitive	0.04488	0.56011
SFI1	Sensitive	0.08297	0.58428	Sensitive	0.04488	0.54306	Sensitive	0.1764	0.56011
INTS6	Sensitive	0.08297	0.58428	Sensitive	0.1764	0.54306	Sensitive	0.04488	0.56011
SLCO1B3	Resistant	0.08297	0.58428	Resistant	0.04488	0.54306	Resistant	0.1764	0.56011
BICD1	Sensitive	0.08297	0.58428	Sensitive	0.32079	0.54306	Sensitive	0.02468	0.56011
SECISBP2L	Resistant	0.08297	0.58428	Resistant	0.04488	0.54306	Resistant	0.17805	0.56011
ANKRD27	Resistant	0.08297	0.58428	Resistant	0.17805	0.54306	Resistant	0.04488	0.56011
MICAL3	Sensitive	0.29143	0.58428	Sensitive	0.0062	0.54306	Sensitive	0.37459	0.65104
ANO8	Sensitive	0.17805	0.58428	Sensitive	0.15492	0.54306	Sensitive	0.02468	0.56011
HDAC9	Resistant	0.08297	0.58428	Resistant	0.25366	0.54306	Resistant	0.0328	0.56011
ITGA6	Sensitive	0.42029	0.74194	Sensitive	0.05691	0.54306	Sensitive	0.03116	0.56011
DSG2	Resistant	0.02468	0.58428	Resistant	0.17971	0.54306	Resistant	0.17476	0.56011
NVL	Sensitive	0.02468	0.58428	Sensitive	0.05523	0.54306	Sensitive	0.5693	0.82143
GIT2	Resistant	0.70465	1	Resistant	0.02468	0.54306	Resistant	0.04488	0.56011
DHX34	Sensitive	0.47004	0.82593	Sensitive	0.01836	0.54306	Sensitive	0.09293	0.56011
SIX5	Sensitive	0.18055	0.58428	Sensitive	0.02468	0.54306	Sensitive	0.18139	0.56011
FAM189B	Resistant	0.10002	0.58428	Resistant	0.04488	0.54306	Resistant	0.18139	0.56011
PPP5C	Sensitive	0.17805	0.58428	Sensitive	0.10198	0.54306	Sensitive	0.04488	0.56011
MCM2	Sensitive	0.04488	0.58428	Sensitive	0.1764	0.54306	Sensitive	0.10297	0.56011
KIAA0586	Resistant	0.99313	1	Resistant	0.0333	0.54306	Resistant	0.02468	0.56011
MPDZ	Sensitive	0.53248	0.85098	Sensitive	0.0324	0.54306	Sensitive	0.04751	0.56011
KMT2B	Sensitive	0.12897	0.58428	Sensitive	0.03999	0.54306	Sensitive	0.15923	0.56011
C9orf3	Sensitive	0.40157	0.72625	Sensitive	0.02468	0.54306	Sensitive	0.08297	0.56011
NDOR1	Sensitive	0.10247	0.58428	Sensitive	0.18139	0.54306	Sensitive	0.04488	0.56011
UBE4A	Sensitive	0.41893	0.74074	Sensitive	0.04488	0.54306	Sensitive	0.04488	0.56011
PYGB	Sensitive	0.25366	0.58428	Sensitive	0.01371	0.54306	Sensitive	0.24826	0.56011
ARID2	Sensitive	0.99124	1	Sensitive	0.03048	0.54306	Sensitive	0.03048	0.56011
ZNF28	Resistant	0.01371	0.58428	Resistant	0.09144	0.54306	Resistant	0.7418	1
NFKB1	Sensitive	0.69819	0.99591	Sensitive	0.01371	0.54306	Sensitive	0.09906	0.56011
RTN3	Sensitive	0.08297	0.58428	Sensitive	0.2573	0.54306	Sensitive	0.04488	0.56011
NUP98	Sensitive	0.10002	0.58428	Sensitive	0.01371	0.54306	Sensitive	0.70465	0.96584
DDX28	Resistant	0.40157	0.72625	Resistant	0.02468	0.54306	Resistant	0.10297	0.56011
PLEKHH3	Sensitive	0.02468	0.58428	Sensitive	0.10002	0.54306	Sensitive	0.423	0.7163
NCOR1	Sensitive	0.42029	0.74194	Sensitive	0.01371	0.54306	Sensitive	0.18139	0.56011
BPTF	Sensitive	0.12574	0.58428	Sensitive	0.01817	0.54306	Sensitive	0.47256	0.79727
SNX21	Sensitive	0.09906	0.58428	Sensitive	0.04488	0.54306	Sensitive	0.24826	0.56011
PDS5A	Resistant	1	1	Resistant	0.02468	0.54306	Resistant	0.04488	0.56011
C3orf17	Sensitive	0.04488	0.58428	Sensitive	0.02468	0.54306	Sensitive	1	1
RXRA	Resistant	0.15789	0.58428	Resistant	0.04488	0.54306	Resistant	0.15789	0.56011
GCFC2	Sensitive	0.15789	0.58428	Sensitive	0.04488	0.54306	Sensitive	0.15789	0.56011
SEC14L2	Sensitive	0.15789	0.58428	Sensitive	0.04488	0.54306	Sensitive	0.15789	0.56011
FBXO4	Sensitive	0.15789	0.58428	Sensitive	0.04488	0.54306	Sensitive	0.15789	0.56011
TMX3	Resistant	0.04488	0.58428	Resistant	0.15789	0.54306	Resistant	0.15789	0.56011
CORO1B	Sensitive	0.15789	0.58428	Sensitive	0.04488	0.54306	Sensitive	0.15789	0.56011
PRRC1	Sensitive	0.15789	0.58428	Sensitive	0.15789	0.54306	Sensitive	0.04488	0.56011
LDLR	Sensitive	0.56036	0.85098	Sensitive	0.04488	0.54306	Sensitive	0.04488	0.56011
DCAF8	Sensitive	0.56036	0.85098	Sensitive	0.04488	0.54306	Sensitive	0.04488	0.56011
DVL2	Sensitive	0.04488	0.58428	Sensitive	0.04488	0.54306	Sensitive	0.56482	0.82143
CORO2A	Sensitive	0.31247	0.58428	Resistant	0.08297	0.54306	Resistant	0.04488	0.56011
PFKFB2	Sensitive	0.08297	0.58428	Sensitive	0.04488	0.54306	Sensitive	0.31247	0.56011
WDR46	Sensitive	0.04488	0.58428	Sensitive	0.08297	0.54306	Sensitive	0.31247	0.56011
HECA	Sensitive	0.31247	0.58428	Sensitive	0.04488	0.54306	Sensitive	0.08297	0.56011
FBXO42	Sensitive	0.08297	0.58428	Sensitive	0.31247	0.54306	Sensitive	0.04488	0.56011
ZNF628	Sensitive	0.5693	0.85098	Sensitive	0.08297	0.54306	Sensitive	0.02468	0.56011
ZDHHC13	Sensitive	0.31523	0.58428	Sensitive	0.08297	0.54306	Sensitive	0.04488	0.56011
CSPP1	Sensitive	0.31523	0.58428	Sensitive	0.04488	0.54306	Sensitive	0.08297	0.56011
PSEN2	Sensitive	0.04488	0.58428	Sensitive	0.08297	0.54306	Sensitive	0.31523	0.56011
FOXP1	Sensitive	0.04488	0.58428	Sensitive	0.08297	0.54306	Sensitive	0.31523	0.56011
NOMO2	Sensitive	0.04488	0.58428	Sensitive	0.08297	0.54306	Sensitive	0.31523	0.56011
TRIM66	Resistant	0.08297	0.58428	Resistant	0.318	0.54306	Resistant	0.04488	0.56011
UBR5	Sensitive	0.04488	0.58428	Sensitive	0.318	0.54306	Sensitive	0.08297	0.56011
BUB1	Sensitive	0.32008	0.58428	Sensitive	0.08297	0.54306	Sensitive	0.04488	0.56011
IDH2	Resistant	0.32008	0.58428	Resistant	0.04488	0.54306	Resistant	0.08297	0.56011
MCM5	Sensitive	0.32008	0.58428	Sensitive	0.04488	0.54306	Sensitive	0.08297	0.56011
PER3	Resistant	0.32008	0.58428	Resistant	0.08297	0.54306	Resistant	0.04488	0.56011
HEATR2	Sensitive	0.32008	0.58428	Sensitive	0.08297	0.54306	Sensitive	0.04488	0.56011
XPO1	Sensitive	0.32079	0.58428	Sensitive	0.08297	0.54306	Sensitive	0.04488	0.56011
TRAF3IP1	Sensitive	0.08297	0.58428	Sensitive	0.32079	0.54306	Sensitive	0.04488	0.56011
ZMYM1	Sensitive	0.08297	0.58428	Sensitive	0.32079	0.54306	Sensitive	0.04488	0.56011
ZBTB45	Sensitive	0.04488	0.58428	Sensitive	0.08297	0.54306	Sensitive	0.32079	0.56011
PIGS	Sensitive	0.32079	0.58428	Sensitive	0.08297	0.54306	Sensitive	0.04488	0.56011
TFIP11	Sensitive	0.31452	0.58428	Sensitive	0.12402	0.54306	Sensitive	0.03148	0.56011
TWF2	Resistant	0.318	0.58428	Resistant	0.02468	0.54306	Resistant	0.15789	0.56011
PHF20L1	Sensitive	0.18139	0.58428	Sensitive	0.15789	0.54306	Sensitive	0.04488	0.56011
DPP9	Resistant	0.15789	0.58428	Resistant	0.18139	0.54306	Resistant	0.04488	0.56011
AHNAK2	Sensitive	0.76636	1	Sensitive	0.15971	0.54306	Sensitive	0.01061	0.56011
FHOD3	Sensitive	0.65101	0.95304	Sensitive	0.04488	0.54306	Sensitive	0.04488	0.56011
KLF10	Sensitive	0.64363	0.95304	Sensitive	0.02468	0.54306	Sensitive	0.08297	0.56011
ATAD2	Resistant	0.47256	0.82982	Resistant	0.01836	0.54306	Resistant	0.15257	0.56011
ZFP91	Resistant	0.65472	0.95304	Resistant	0.02468	0.54306	Resistant	0.08297	0.56011
THAP4	Sensitive	0.03148	0.58428	Sensitive	0.10297	0.54306	Sensitive	0.41489	0.70833
MLH1	Sensitive	0.0328	0.58428	Sensitive	0.26098	0.54306	Sensitive	0.15971	0.56011
MAP2K7	Sensitive	0.31523	0.58428	Sensitive	0.0981	0.54306	Sensitive	0.04488	0.56011
TNKS1BP1	Resistant	0.99625	1	Resistant	0.01371	0.54306	Resistant	0.10198	0.56011
CCPG1	Sensitive	0.1764	0.58428	Sensitive	0.1764	0.54306	Sensitive	0.04488	0.56011
TRERF1	Sensitive	0.02468	0.58428	Sensitive	0.31523	0.54306	Sensitive	0.18139	0.56011
GPRC5C	Sensitive	0.32079	0.58428	Sensitive	0.0981	0.54306	Sensitive	0.04488	0.56011
PKNOX1	Sensitive	0.04488	0.58428	Sensitive	0.10002	0.54306	Sensitive	0.31523	0.56011
OSCP1	Sensitive	0.04488	0.58428	Sensitive	0.17805	0.54306	Sensitive	0.17805	0.56011
GALNT10	Resistant	0.04488	0.58428	Resistant	0.17805	0.54306	Resistant	0.17805	0.56011
TENM2	Sensitive	0.17805	0.58428	Sensitive	0.04488	0.54306	Sensitive	0.17805	0.56011
DHX32	Sensitive	0.02468	0.58428	Sensitive	0.17971	0.54306	Sensitive	0.32079	0.56011
GABBR1	Sensitive	0.32079	0.58428	Sensitive	0.17971	0.54306	Sensitive	0.02468	0.56011
VARS2	Sensitive	0.18139	0.58428	Sensitive	0.02468	0.54306	Sensitive	0.32079	0.56011
XRN2	Resistant	0.17971	0.58428	Resistant	0.04488	0.54306	Resistant	0.17805	0.56011
ACAD10	Sensitive	0.70465	1	Sensitive	0.14908	0.54306	Sensitive	0.01371	0.56011
USP40	Resistant	0.1514	0.58428	Resistant	0.69819	0.93934	Resistant	0.01371	0.56011
KIAA2018	Resistant	0.04488	0.58428	Resistant	0.17971	0.54306	Resistant	0.17971	0.56011
ALS2	Resistant	0.26098	0.58428	Resistant	0.01371	0.54306	Resistant	0.40687	0.70226
APMAP	Sensitive	0.04488	0.58428	Sensitive	0.18139	0.54306	Sensitive	0.18139	0.56011
FAM83D	Sensitive	0.18139	0.58428	Sensitive	0.18139	0.54306	Sensitive	0.04488	0.56011
ACTR3B	Sensitive	0.10297	0.58428	Sensitive	0.04488	0.54306	Sensitive	0.32079	0.56011
NFXL1	Resistant	0.04488	0.58428	Resistant	0.08297	0.54306	Resistant	0.4122	0.7066
CCDC66	Resistant	0.04488	0.58428	Resistant	0.41623	0.6887	Resistant	0.08297	0.56011
CTDP1	Sensitive	0.73889	1	Sensitive	0.01083	0.54306	Sensitive	0.19878	0.56011
VPS13C	Sensitive	0.77171	1	Sensitive	0.04351	0.54306	Sensitive	0.04898	0.56011
SRCAP	Resistant	0.99599	1	Resistant	0.45055	0.7393	Resistant	0.00379	0.56011
IBTK	Resistant	0.1764	0.58428	Resistant	0.03181	0.54306	Resistant	0.31247	0.56011
PASK	Sensitive	0.04488	0.58428	Sensitive	0.09482	0.54306	Sensitive	0.41354	0.70824
TANC2	Resistant	0.04488	0.58428	Resistant	0.0981	0.54306	Resistant	0.40157	0.69651
KANK2	Sensitive	0.40687	0.73281	Sensitive	0.0981	0.54306	Sensitive	0.04488	0.56011
DIAPH1	Resistant	0.17971	0.58428	Resistant	0.4122	0.68578	Resistant	0.02468	0.56011
HSPG2	Sensitive	0.03759	0.58428	Sensitive	0.08751	0.54306	Sensitive	0.58371	0.84189
GSE1	Sensitive	0.60532	0.90384	Sensitive	0.2467	0.54306	Sensitive	0.01287	0.56011
PTPRU	Sensitive	0.41758	0.73906	Sensitive	0.04488	0.54306	Sensitive	0.10297	0.56011
KLHL36	Sensitive	0.10297	0.58428	Sensitive	0.04488	0.54306	Sensitive	0.41758	0.70996
SIPA1L3	Resistant	0.00767	0.58428	Resistant	0.25547	0.54306	Resistant	0.99625	1
EXPH5	Sensitive	0.04488	0.58428	Resistant	0.99771	1	Resistant	0.04488	0.56011
ZDHHC23	Resistant	1	1	Resistant	0.04488	0.54306	Resistant	0.04488	0.56011
GLI3	Sensitive	0.04488	0.58428	Sensitive	1	1	Sensitive	0.04488	0.56011
NKIRAS2	Sensitive	1	1	Sensitive	0.04488	0.54306	Sensitive	0.04488	0.56011
SLC9A1	Sensitive	0.08297	0.58428	Resistant	0.985	1	Resistant	0.02468	0.56011
STX18	Sensitive	0.02468	0.58428	Sensitive	0.1764	0.54306	Sensitive	0.46754	0.78978
EPHB6	Sensitive	0.08297	0.58428	Sensitive	0.02468	0.54306	Resistant	1	1
OSBP	Sensitive	0.02468	0.58428	Sensitive	0.08297	0.54306	Sensitive	1	1
HDHD2	Resistant	1	1	Resistant	0.08297	0.54306	Resistant	0.02468	0.56011
ALMS1	Sensitive	0.48268	0.84557	Sensitive	0.03347	0.54306	Sensitive	0.12748	0.56011
KIF1C	Sensitive	0.41489	0.73761	Sensitive	0.03116	0.54306	Sensitive	0.16093	0.56011
KCMF1	Resistant	0.04488	0.58428	Resistant	0.08297	0.54306	Resistant	0.56036	0.82143
SERINC1	Sensitive	0.56036	0.85098	Sensitive	0.08297	0.54306	Sensitive	0.04488	0.56011
EDC3	Sensitive	0.56036	0.85098	Sensitive	0.08297	0.54306	Sensitive	0.04488	0.56011
AGPAT9	Sensitive	0.56036	0.85098	Sensitive	0.04488	0.54306	Sensitive	0.08297	0.56011
SHPRH	Sensitive	0.56036	0.85098	Sensitive	0.08297	0.54306	Sensitive	0.04488	0.56011
BIRC6	Sensitive	0.01663	0.58428	Sensitive	0.34652	0.58562	Sensitive	0.36303	0.63155
CLASRP	Resistant	0.65844	0.95304	Resistant	0.03213	0.54306	Resistant	0.09906	0.56011
KLHL13	Sensitive	0.56482	0.85098	Sensitive	0.08297	0.54306	Sensitive	0.04488	0.56011
C16orf95	Resistant	0.56482	0.85098	Resistant	0.04488	0.54306	Resistant	0.08297	0.56011
DNM2	Resistant	0.56482	0.85098	Resistant	0.08297	0.54306	Resistant	0.04488	0.56011
IFNAR2	Sensitive	0.56482	0.85098	Sensitive	0.08297	0.54306	Sensitive	0.04488	0.56011
DDX20	Sensitive	0.56482	0.85098	Sensitive	0.04488	0.54306	Sensitive	0.08297	0.56011
SIRT3	Sensitive	0.56482	0.85098	Sensitive	0.04488	0.54306	Sensitive	0.08297	0.56011
LYAR	Sensitive	0.56482	0.85098	Sensitive	0.08297	0.54306	Sensitive	0.04488	0.56011
PRUNE2	Sensitive	0.56706	0.85098	Sensitive	0.08297	0.54306	Sensitive	0.04488	0.56011
FBXW5	Sensitive	0.01371	0.58428	Sensitive	0.1573	0.54306	Resistant	0.98209	1
MECOM	Sensitive	0.5693	0.85098	Sensitive	0.08297	0.54306	Sensitive	0.04488	0.56011
IGFBP4	Sensitive	0.5693	0.85098	Sensitive	0.04488	0.54306	Sensitive	0.08297	0.56011
ORC1	Sensitive	0.5693	0.85098	Sensitive	0.04488	0.54306	Sensitive	0.08297	0.56011
IRS2	Sensitive	0.5693	0.85098	Sensitive	0.08297	0.54306	Sensitive	0.04488	0.56011
STARD3	Sensitive	0.04488	0.58428	Sensitive	0.5693	0.80261	Sensitive	0.08297	0.56011
PSIP1	Sensitive	0.5693	0.85098	Sensitive	0.04488	0.54306	Sensitive	0.08297	0.56011
ZNF496	Resistant	0.08297	0.58428	Resistant	0.5693	0.80261	Resistant	0.04488	0.56011
SCAP	Sensitive	0.70465	1	Sensitive	0.09144	0.54306	Sensitive	0.03313	0.56011
MKL1	Sensitive	0.26283	0.58428	Sensitive	0.25366	0.54306	Sensitive	0.0328	0.56011
NOTCH1	Sensitive	0.7864	1	Sensitive	0.08931	0.54306	Sensitive	0.03115	0.56011
LPIN3	Sensitive	0.15789	0.58428	Sensitive	0.04488	0.54306	Sensitive	0.31247	0.56011
JUND	Resistant	0.02468	0.58428	Resistant	0.15789	0.54306	Resistant	0.5693	0.82143
EPN1	Sensitive	0.15789	0.58428	Sensitive	0.31523	0.54306	Sensitive	0.04488	0.56011
SLTM	Sensitive	0.15789	0.58428	Sensitive	0.04488	0.54306	Sensitive	0.31523	0.56011
DDX24	Sensitive	0.15789	0.58428	Sensitive	0.318	0.54306	Sensitive	0.04488	0.56011
MAU2	Resistant	0.3194	0.58428	Resistant	0.15789	0.54306	Resistant	0.04488	0.56011
DNAJB9	Sensitive	0.32008	0.58428	Sensitive	0.04488	0.54306	Sensitive	0.15789	0.56011
ZMYND11	Resistant	0.04488	0.58428	Resistant	0.32008	0.54306	Resistant	0.15789	0.56011
USP25	Resistant	0.32008	0.58428	Resistant	0.04488	0.54306	Resistant	0.15789	0.56011
HR	Resistant	0.32008	0.58428	Resistant	0.15789	0.54306	Resistant	0.04488	0.56011
DSEL	Sensitive	0.32008	0.58428	Sensitive	0.04488	0.54306	Sensitive	0.15789	0.56011
CLIP2	Sensitive	0.32079	0.58428	Sensitive	0.04488	0.54306	Sensitive	0.15789	0.56011
ZFP36	Sensitive	0.15789	0.58428	Sensitive	0.32079	0.54306	Sensitive	0.04488	0.56011
IER5L	Resistant	0.04488	0.58428	Resistant	0.32079	0.54306	Resistant	0.15789	0.56011
IFT81	Resistant	0.08297	0.58428	Resistant	0.04488	0.54306	Resistant	0.64363	0.91874
PDCD6	Sensitive	0.65472	0.95304	Sensitive	0.04488	0.54306	Sensitive	0.08297	0.56011
AHI1	Resistant	0.04488	0.58428	Resistant	0.65472	0.89825	Resistant	0.08297	0.56011
SETD6	Sensitive	0.31247	0.58428	Sensitive	0.04488	0.54306	Sensitive	0.17476	0.56011
SPRTN	Sensitive	0.04488	0.58428	Sensitive	0.65844	0.89825	Sensitive	0.08297	0.56011
BSDC1	Sensitive	0.04488	0.58428	Sensitive	0.08297	0.54306	Sensitive	0.66216	0.91947
PARP9	Resistant	0.66589	0.95452	Resistant	0.08297	0.54306	Resistant	0.04488	0.56011
APEX2	Resistant	0.04488	0.58428	Resistant	0.08297	0.54306	Resistant	0.66589	0.91947
EXOC4	Resistant	0.99313	1	Resistant	0.02468	0.54306	Resistant	0.10297	0.56011
CREBBP	Sensitive	0.55077	0.85098	Sensitive	0.23213	0.54306	Sensitive	0.01975	0.56011
DHX37	Sensitive	0.9925	1	Sensitive	0.05691	0.54306	Sensitive	0.04488	0.56011
CCM2	Sensitive	0.31247	0.58428	Sensitive	0.04488	0.54306	Sensitive	0.18139	0.56011
USP42	Sensitive	0.25456	0.58428	Sensitive	0.31638	0.54306	Sensitive	0.03313	0.56011
NSD1	Sensitive	0.03474	0.58428	Sensitive	0.15257	0.54306	Sensitive	0.52292	0.82143
MAP3K9	Resistant	0.65101	0.95304	Resistant	0.04488	0.54306	Resistant	0.0981	0.56011
ARHGAP23	Sensitive	0.65472	0.95304	Resistant	0.10002	0.54306	Resistant	0.04488	0.56011
RAF1	Sensitive	0.66589	0.95452	Sensitive	0.02468	0.54306	Sensitive	0.17971	0.56011
ATXN2	Resistant	0.10198	0.58428	Resistant	0.65101	0.89825	Resistant	0.04488	0.56011
ZZZ3	Resistant	0.25913	0.58428	Resistant	0.04488	0.54306	Resistant	0.25638	0.56011
PCM1	Resistant	0.47256	0.82982	Resistant	0.01836	0.54306	Resistant	0.35064	0.61105
PIEZO1	Sensitive	0.70172	0.99979	Sensitive	0.02129	0.54306	Sensitive	0.20396	0.56011
STAM2	Sensitive	0.31523	0.58428	Sensitive	0.01371	0.54306	Sensitive	0.70789	0.96835
SORL1	Sensitive	0.70465	1	Sensitive	0.0981	0.54306	Sensitive	0.04488	0.56011
PHRF1	Sensitive	0.25547	0.58428	Sensitive	0.01874	0.54306	Resistant	0.66589	0.91947
HCFC1	Sensitive	0.03021	0.58428	Sensitive	0.23082	0.54306	Sensitive	0.46255	0.78243
KIAA0430	Resistant	1	1	Resistant	0.10297	0.54306	Resistant	0.03246	0.56011
AKR1B15	Resistant	0.41489	0.73761	Resistant	0.18139	0.54306	Resistant	0.04488	0.56011
DYNC1H1	Sensitive	0.9854	1	Sensitive	0.13045	0.54306	Sensitive	0.02694	0.56011
DAXX	Sensitive	0.41758	0.73906	Sensitive	0.03347	0.54306	Sensitive	0.26283	0.56011
DYNC2H1	Resistant	0.65472	0.95304	Resistant	0.41086	0.68578	Resistant	0.01371	0.56011
COG6	Sensitive	1	1	Sensitive	0.04488	0.54306	Sensitive	0.08297	0.56011
AP1G1	Resistant	1	1	Resistant	0.04488	0.54306	Resistant	0.08297	0.56011
LENG8	Sensitive	0.04488	0.58428	Resistant	1	1	Resistant	0.08297	0.56011
ARID5B	Sensitive	0.02468	0.58428	Sensitive	0.99438	1	Sensitive	0.15433	0.56011
ADCY6	Resistant	0.02468	0.58428	Resistant	0.15789	0.54306	Resistant	1	1
MAGI1	Sensitive	0.30172	0.58428	Sensitive	0.03148	0.54306	Sensitive	0.4122	0.7066
PRICKLE3	Resistant	0.15789	0.58428	Resistant	0.04488	0.54306	Resistant	0.56035	0.82143
SAMD4B	Sensitive	0.56036	0.85098	Sensitive	0.04488	0.54306	Sensitive	0.15789	0.56011
XAB2	Resistant	0.04488	0.58428	Resistant	0.56036	0.80261	Resistant	0.15789	0.56011
KLHL22	Sensitive	0.56482	0.85098	Sensitive	0.15789	0.54306	Sensitive	0.04488	0.56011
SSX2IP	Sensitive	0.15789	0.58428	Sensitive	0.56482	0.80261	Sensitive	0.04488	0.56011
TRAPPC8	Sensitive	0.56706	0.85098	Sensitive	0.04488	0.54306	Sensitive	0.15789	0.56011
SP4	Sensitive	0.04488	0.58428	Sensitive	0.15789	0.54306	Sensitive	0.5693	0.82143
CCNK	Sensitive	0.15789	0.58428	Sensitive	0.04488	0.54306	Resistant	0.5693	0.82143
ZDHHC20	Resistant	0.5693	0.85098	Resistant	0.04488	0.54306	Resistant	0.15789	0.56011
TNC	Resistant	0.03246	0.58428	Resistant	0.70789	0.94856	Resistant	0.1764	0.56011
KIF18B	Sensitive	0.72089	1	Sensitive	0.03213	0.54306	Sensitive	0.1764	0.56011
SENP5	Resistant	0.26097	0.58428	Resistant	0.65101	0.89825	Resistant	0.02468	0.56011
C6orf141	Resistant	0.17804	0.58428	Resistant	0.99063	1	Resistant	0.02468	0.56011
USP28	Sensitive	0.56036	0.85098	Sensitive	0.02468	0.54306	Sensitive	0.31523	0.56011
AIFM2	Resistant	0.04488	0.58428	Resistant	0.31247	0.54306	Resistant	0.31247	0.56011
GPATCH2	Resistant	0.31247	0.58428	Resistant	0.31523	0.54306	Resistant	0.04488	0.56011
ZNF354A	Sensitive	1	1	Sensitive	0.02468	0.54306	Sensitive	0.17971	0.56011
C2orf44	Resistant	0.56036	0.85098	Resistant	0.02468	0.54306	Resistant	0.32079	0.56011
WDR6	Resistant	0.04488	0.58428	Resistant	0.10002	0.54306	Resistant	0.98875	1
NAV3	Sensitive	0.31523	0.58428	Sensitive	0.31523	0.54306	Sensitive	0.04488	0.56011
RFC1	Sensitive	0.56482	0.85098	Sensitive	0.02468	0.54306	Sensitive	0.32008	0.56011
DNMT3B	Sensitive	0.318	0.58428	Sensitive	0.02468	0.54306	Sensitive	0.5693	0.82143
STAG1	Resistant	1	1	Resistant	0.18139	0.54306	Resistant	0.02468	0.56011
ZBTB33	Sensitive	0.32008	0.58428	Sensitive	0.04488	0.54306	Sensitive	0.31247	0.56011
MESDC1	Resistant	1	1	Resistant	0.10002	0.54306	Resistant	0.04488	0.56011
SPATA5L1	Sensitive	0.56482	0.85098	Sensitive	0.17805	0.54306	Sensitive	0.04488	0.56011
MRPS6	Sensitive	0.32008	0.58428	Sensitive	0.04488	0.54306	Sensitive	0.31523	0.56011
IRF2BPL	Sensitive	0.04488	0.58428	Sensitive	0.24826	0.54306	Sensitive	0.40687	0.70226
HSPA12A	Sensitive	0.5693	0.85098	Sensitive	0.04488	0.54306	Sensitive	0.17805	0.56011
RHPN1	Resistant	0.32008	0.58428	Resistant	0.318	0.54306	Resistant	0.04488	0.56011
SSBP4	Sensitive	0.56706	0.85098	Sensitive	0.04488	0.54306	Sensitive	0.17971	0.56011
IPO5	Sensitive	0.32008	0.58428	Resistant	0.32008	0.54306	Resistant	0.04488	0.56011
RNF20	Sensitive	0.32079	0.58428	Sensitive	0.04488	0.54306	Sensitive	0.32079	0.56011
VCL	Resistant	0.04488	0.58428	Resistant	0.15789	0.54306	Resistant	0.65844	0.91874
ACTR6	Sensitive	0.04488	0.58428	Sensitive	0.15789	0.54306	Resistant	0.66589	0.91947
ERCC6L	Resistant	0.30716	0.58428	Resistant	0.47507	0.77677	Resistant	0.03296	0.56011
MYO1C	Sensitive	0.46754	0.82219	Sensitive	0.41758	0.6887	Sensitive	0.02468	0.56011
ZNF516	Resistant	1	1	Resistant	0.03148	0.54306	Resistant	0.15433	0.56011
ERBB2	Sensitive	0.99708	1	Sensitive	0.15257	0.54306	Sensitive	0.03246	0.56011
ERBB3	Sensitive	0.64732	0.95304	Sensitive	0.04488	0.54306	Sensitive	0.17476	0.56011
TRIM11	Resistant	0.64363	0.95304	Resistant	0.02468	0.54306	Resistant	0.32079	0.56011
RAB11FIP1	Sensitive	0.65101	0.95304	Sensitive	0.04488	0.54306	Sensitive	0.17476	0.56011
FOCAD	Resistant	0.318	0.58428	Resistant	0.02468	0.54306	Resistant	0.65101	0.91874
WDR13	Sensitive	0.318	0.58428	Sensitive	0.65472	0.89825	Sensitive	0.02468	0.56011
GIGYF2	Sensitive	0.65287	0.95304	Sensitive	0.17971	0.54306	Sensitive	0.04488	0.56011
BAI2	Sensitive	0.02468	0.58428	Sensitive	0.32079	0.54306	Sensitive	0.66589	0.91947
AKAP13	Sensitive	0.99416	1	Resistant	0.03347	0.54306	Resistant	0.1585	0.56011
UBA3	Resistant	0.66216	0.95354	Resistant	0.04488	0.54306	Resistant	0.17971	0.56011
SPTY2D1	Resistant	0.18139	0.58428	Resistant	0.04488	0.54306	Resistant	0.65844	0.91874
PLCB1	Resistant	0.01371	0.58428	Resistant	0.40953	0.68496	Resistant	0.99438	1
MED13L	Sensitive	0.3579	0.65058	Sensitive	0.32012	0.54306	Sensitive	0.04953	0.56011
TMEM185B	Resistant	0.65658	0.95304	Resistant	0.65472	0.89825	Resistant	0.01371	0.56011
CHTF18	Sensitive	0.40687	0.73281	Sensitive	0.02468	0.54306	Resistant	0.65101	0.91874
BRWD3	Resistant	0.47633	0.83565	Resistant	0.03355	0.54306	Resistant	0.41488	0.70833
MCF2L	Sensitive	0.04488	0.58428	Sensitive	0.15789	0.54306	Resistant	0.99313	1
APLP1	Sensitive	0.15789	0.58428	Resistant	0.99771	1	Resistant	0.04488	0.56011
FGFR3	Sensitive	1	1	Sensitive	0.04488	0.54306	Sensitive	0.15789	0.56011
ENTPD4	Resistant	1	1	Resistant	0.04488	0.54306	Resistant	0.15789	0.56011
CCP110	Resistant	1	1	Resistant	0.15789	0.54306	Resistant	0.04488	0.56011
PRSS23	Resistant	1	1	Resistant	0.04488	0.54306	Resistant	0.15789	0.56011
ABCB9	Sensitive	0.04488	0.58428	Sensitive	1	1	Sensitive	0.15789	0.56011
NOB1	Sensitive	1	1	Sensitive	0.15789	0.54306	Sensitive	0.04488	0.56011
GOLGA8A	Sensitive	0.50638	0.85098	Sensitive	0.03102	0.54306	Sensitive	0.46754	0.78978
DVL1	Resistant	0.04488	0.58428	Resistant	0.26283	0.54306	Resistant	0.64363	0.91874
AASDH	Sensitive	0.04488	0.58428	Sensitive	0.4122	0.68578	Sensitive	0.4122	0.7066
ZNF700	Sensitive	0.04488	0.58428	Sensitive	0.25547	0.54306	Sensitive	0.66589	0.91947
SLC39A10	Resistant	0.99313	1	Resistant	0.02468	0.54306	Resistant	0.31247	0.56011
CRYBG3	Sensitive	0.5265	0.85098	Sensitive	0.47508	0.77677	Sensitive	0.03102	0.56011
LAMC2	Sensitive	0.318	0.58428	Resistant	0.9925	1	Resistant	0.02468	0.56011
ABCC3	Sensitive	0.25185	0.58428	Sensitive	0.03148	0.54306	Sensitive	0.98875	1
LPCAT4	Resistant	0.02468	0.58428	Resistant	0.99313	1	Resistant	0.32008	0.56011
MANBA	Sensitive	0.318	0.58428	Sensitive	0.02468	0.54306	Sensitive	1	1
GFER	Sensitive	0.04488	0.58428	Sensitive	0.56036	0.80261	Sensitive	0.31247	0.56011
CENPB	Sensitive	0.56036	0.85098	Sensitive	0.04488	0.54306	Sensitive	0.31247	0.56011
KIAA1549L	Resistant	0.04488	0.58428	Resistant	0.56036	0.80261	Resistant	0.31247	0.56011
USP1	Sensitive	0.41489	0.73761	Sensitive	0.423	0.69441	Sensitive	0.04488	0.56011
CCT7	Resistant	1	1	Resistant	0.1764	0.54306	Resistant	0.04488	0.56011
EIF4ENIF1	Resistant	0.04488	0.58428	Resistant	0.31523	0.54306	Resistant	0.56036	0.82143
UPF2	Sensitive	0.04488	0.58428	Sensitive	0.42029	0.6914	Sensitive	0.42029	0.71313
RPS6KA4	Resistant	1	1	Resistant	0.01913	0.54306	Resistant	0.41489	0.70833
ISYNA1	Resistant	1	1	Resistant	0.04488	0.54306	Resistant	0.17805	0.56011
KIAA1244	Sensitive	0.17971	0.58428	Sensitive	0.04488	0.54306	Resistant	0.99313	1
COL6A2	Resistant	0.56036	0.85098	Resistant	0.32008	0.54306	Resistant	0.04488	0.56011
TARBP1	Sensitive	0.32008	0.58428	Sensitive	0.04488	0.54306	Sensitive	0.56036	0.82143
BTBD11	Resistant	0.04488	0.58428	Resistant	0.56036	0.80261	Resistant	0.32008	0.56011
PIM2	Sensitive	0.04488	0.58428	Resistant	0.5693	0.80261	Resistant	0.31523	0.56011
TNFRSF1B	Resistant	0.318	0.58428	Resistant	0.56482	0.80261	Resistant	0.04488	0.56011
CXorf56	Sensitive	0.04488	0.58428	Sensitive	0.318	0.54306	Sensitive	0.56482	0.82143
ZNF598	Sensitive	0.56482	0.85098	Sensitive	0.318	0.54306	Sensitive	0.04488	0.56011
NEIL2	Resistant	0.04488	0.58428	Resistant	0.56482	0.80261	Resistant	0.318	0.56011
DCAF12	Resistant	0.56036	0.85098	Resistant	0.32079	0.54306	Resistant	0.04488	0.56011
ANKFY1	Sensitive	0.56482	0.85098	Sensitive	0.32008	0.54306	Sensitive	0.04488	0.56011
SPIRE2	Sensitive	0.32008	0.58428	Sensitive	0.04488	0.54306	Sensitive	0.56482	0.82143
FZD4	Resistant	0.5693	0.85098	Resistant	0.04488	0.54306	Resistant	0.318	0.56011
SYNM	Sensitive	0.04488	0.58428	Sensitive	0.56482	0.80261	Sensitive	0.32079	0.56011
PAXBP1	Resistant	0.04488	0.58428	Resistant	0.56482	0.80261	Resistant	0.32079	0.56011
ACVR1	Resistant	0.04488	0.58428	Resistant	0.32008	0.54306	Resistant	0.5693	0.82143
EPB41	Resistant	0.04488	0.58428	Resistant	0.32008	0.54306	Resistant	0.5693	0.82143
GSTZ1	Sensitive	0.5693	0.85098	Sensitive	0.04488	0.54306	Sensitive	0.32008	0.56011
POLL	Resistant	0.32008	0.58428	Resistant	0.5693	0.80261	Resistant	0.04488	0.56011
SMTN	Sensitive	0.32079	0.58428	Sensitive	0.5693	0.80261	Resistant	0.04488	0.56011
MYH9	Resistant	0.34884	0.63462	Resistant	0.03313	0.54306	Resistant	0.71763	0.97877
SCAF8	Resistant	0.04488	0.58428	Resistant	0.25913	0.54306	Resistant	0.71763	0.97877
SMAD6	Sensitive	0.56036	0.85098	Sensitive	0.02468	0.54306	Sensitive	0.64732	0.91874
CHPF2	Sensitive	0.68533	0.98165	Sensitive	0.0328	0.54306	Sensitive	0.40687	0.70226
GLIPR2	Resistant	0.04488	0.58428	Resistant	0.31523	0.54306	Resistant	0.65101	0.91874
NOC2L	Sensitive	0.56482	0.85098	Sensitive	0.66216	0.8991	Sensitive	0.02468	0.56011
CACNA1H	Sensitive	0.04488	0.58428	Resistant	0.65844	0.89825	Resistant	0.31247	0.56011
PGM2	Resistant	0.04488	0.58428	Resistant	0.31247	0.54306	Resistant	0.66216	0.91947
SMYD3	Resistant	0.04488	0.58428	Resistant	0.64916	0.89825	Resistant	0.32008	0.56011
MAML2	Sensitive	0.66216	0.95354	Sensitive	0.04488	0.54306	Sensitive	0.318	0.56011
EZH1	Resistant	0.04488	0.58428	Resistant	0.32079	0.54306	Resistant	0.66589	0.91947
USP9X	Sensitive	0.4122	0.73569	Sensitive	0.03181	0.54306	Resistant	0.75494	1
CEP97	Resistant	0.99625	1	Resistant	0.02468	0.54306	Resistant	0.41758	0.70996
FHOD1	Sensitive	0.56036	0.85098	Resistant	0.04488	0.54306	Resistant	0.4122	0.7066
FN1	Sensitive	0.04488	0.58428	Sensitive	0.41489	0.68755	Sensitive	0.56482	0.82143
MAP3K11	Resistant	0.04488	0.58428	Resistant	0.98875	1	Resistant	0.25005	0.56011
NXN	Sensitive	0.04488	0.58428	Resistant	0.65287	0.89825	Resistant	0.41758	0.70996
MAP4	Sensitive	1	1	Resistant	0.56036	0.80261	Resistant	0.02468	0.56011
MAN2B1	Resistant	1	1	Resistant	0.31247	0.54306	Resistant	0.04488	0.56011
KIAA0232	Sensitive	1	1	Sensitive	0.31247	0.54306	Sensitive	0.04488	0.56011
TBRG4	Sensitive	0.99313	1	Sensitive	0.04488	0.54306	Sensitive	0.31523	0.56011
ZNF668	Resistant	0.56036	0.85098	Resistant	0.56036	0.80261	Resistant	0.04488	0.56011
ELMO2	Sensitive	0.56036	0.85098	Sensitive	0.04488	0.54306	Sensitive	0.56036	0.82143
FANCC	Sensitive	0.99771	1	Resistant	0.31523	0.54306	Resistant	0.04488	0.56011
LLGL2	Resistant	0.04488	0.58428	Resistant	0.31523	0.54306	Resistant	1	1
ALKBH1	Resistant	1	1	Resistant	0.31523	0.54306	Resistant	0.04488	0.56011
RAB11FIP5	Resistant	0.04488	0.58428	Resistant	0.99771	1	Resistant	0.318	0.56011
HP1BP3	Resistant	0.99771	1	Resistant	0.318	0.54306	Resistant	0.04488	0.56011
NMRAL1	Sensitive	1	1	Sensitive	0.04488	0.54306	Sensitive	0.318	0.56011
EXOC6	Sensitive	0.56482	0.85098	Sensitive	0.04488	0.54306	Sensitive	0.56482	0.82143
IQCC	Sensitive	0.04488	0.58428	Sensitive	0.56482	0.80261	Sensitive	0.56482	0.82143
CDC23	Resistant	0.32008	0.58428	Resistant	0.04488	0.54306	Resistant	1	1
SLC25A17	Resistant	0.04488	0.58428	Resistant	0.32008	0.54306	Resistant	1	1
PPAP2C	Sensitive	0.04488	0.58428	Sensitive	0.32079	0.54306	Resistant	1	1
VPS53	Sensitive	1	1	Sensitive	0.04488	0.54306	Sensitive	0.32079	0.56011
ASPSCR1	Sensitive	1	1	Resistant	0.32079	0.54306	Resistant	0.04488	0.56011
DDX60L	Resistant	0.5693	0.85098	Resistant	0.04488	0.54306	Resistant	0.56482	0.82143
RIPK4	Resistant	0.04488	0.58428	Resistant	0.56482	0.80261	Resistant	0.5693	0.82143
WRN	Sensitive	0.5693	0.85098	Sensitive	0.5693	0.80261	Sensitive	0.04488	0.56011
COG1	Sensitive	0.5693	0.85098	Sensitive	0.04488	0.54306	Sensitive	0.5693	0.82143
COX3	Resistant	0.56036	0.85098	Resistant	0.04488	0.54306	Resistant	0.64732	0.91874
ARMC5	Sensitive	0.56482	0.85098	Sensitive	0.64732	0.89825	Sensitive	0.04488	0.56011
SFSWAP	Sensitive	0.03213	0.58428	Sensitive	0.71763	0.95742	Sensitive	0.71438	0.97518
TLN2	Resistant	0.03246	0.58428	Resistant	0.70465	0.94549	Resistant	0.72416	0.98693
XPC	Resistant	0.04488	0.58428	Resistant	0.6603	0.8991	Resistant	0.56036	0.82143
FBXL3	Resistant	0.56482	0.85098	Resistant	0.04488	0.54306	Resistant	0.65844	0.91874
CCAR1	Sensitive	0.04488	0.58428	Resistant	0.65472	0.89825	Resistant	0.5693	0.82143
NAIF1	Sensitive	0.65844	0.95304	Sensitive	0.04488	0.54306	Sensitive	0.5693	0.82143
HEG1	Sensitive	0.66589	0.95452	Resistant	0.04488	0.54306	Resistant	0.5693	0.82143
MON2	Sensitive	0.03347	0.58428	Resistant	0.69175	0.93387	Resistant	0.75201	1
PIK3R4	Sensitive	0.56036	0.85098	Resistant	0.99771	1	Resistant	0.03181	0.56011
GPBP1	Sensitive	0.04488	0.58428	Sensitive	0.71113	0.95128	Sensitive	0.5693	0.82143
PCSK1N	Sensitive	0.99771	1	Resistant	0.41893	0.6903	Resistant	0.04488	0.56011
LIMCH1	Resistant	0.66589	0.95452	Resistant	0.64732	0.89825	Resistant	0.04488	0.56011
FAM179B	Resistant	0.04488	0.58428	Resistant	0.66216	0.8991	Resistant	0.66216	0.91947
PPP1R26	Resistant	0.7483	1	Resistant	0.0337	0.54306	Resistant	0.80618	1
ZNF711	Sensitive	0.64916	0.95304	Resistant	0.99625	1	Resistant	0.03279	0.56011
UHRF1BP1L	Sensitive	0.74909	1	Sensitive	0.04488	0.54306	Sensitive	0.71438	0.97518
KIAA1468	Resistant	0.02468	0.58428	Resistant	0.9925	1	Resistant	0.9925	1
PROS1	Resistant	0.04488	0.58428	Resistant	1	1	Resistant	0.56036	0.82143
FBXO46	Resistant	1	1	Resistant	0.56036	0.80261	Resistant	0.04488	0.56011
PPP2R1A	Resistant	0.04488	0.58428	Resistant	0.99771	1	Resistant	0.56482	0.82143
FCHSD2	Sensitive	0.56482	0.85098	Sensitive	0.04488	0.54306	Sensitive	1	1
MAT2B	Sensitive	0.56482	0.85098	Sensitive	0.04488	0.54306	Sensitive	1	1
ULBP2	Resistant	0.04488	0.58428	Resistant	0.56482	0.80261	Resistant	1	1
C16orf59	Sensitive	0.5693	0.85098	Resistant	0.99313	1	Resistant	0.04488	0.56011
BAG3	Sensitive	1	1	Sensitive	0.04488	0.54306	Sensitive	0.5693	0.82143
HEBP1	Sensitive	0.04488	0.58428	Sensitive	1	1	Sensitive	0.5693	0.82143
CDH24	Sensitive	0.04488	0.58428	Resistant	1	1	Resistant	0.5693	0.82143
LRRC8E	Sensitive	1	1	Sensitive	0.5693	0.80261	Sensitive	0.04488	0.56011
HIRA	Sensitive	0.99313	1	Sensitive	0.65472	0.89825	Sensitive	0.04488	0.56011
ACLY	Sensitive	1	1	Sensitive	0.04488	0.54306	Sensitive	0.65101	0.91874
SKIV2L	Resistant	0.98209	1	Resistant	0.04488	0.54306	Resistant	0.66589	0.91947
HDAC7	Sensitive	0.65472	0.95304	Resistant	1	1	Resistant	0.04488	0.56011
RTTN	Resistant	0.98875	1	Resistant	0.69175	0.93387	Resistant	0.04488	0.56011
FGFR2	Sensitive	0.99313	1	Sensitive	0.70142	0.94264	Resistant	0.04488	0.56011
ZNF205	Resistant	0.04488	0.58428	Resistant	1	1	Resistant	0.99313	1
TRIM26	Resistant	0.04488	0.58428	Resistant	1	1	Resistant	0.99771	1
OSBPL6	Sensitive	1	1	Sensitive	0.99771	1	Sensitive	0.04488	0.56011
ZNF12	Sensitive	1	1	Resistant	1	1	Resistant	0.04488	0.56011

## Sheet: Table S3 Mutations-Epithelial
Genes	24hr subgroup with enriched mutations	24hr P-value	24hr adjusted P-value	48hr subgroup with enriched mutations	48hr P-value	48hr adjusted P-value	72hr subgroup with enriched mutations	72hr P-value	72hr adjusted P-value
POTEE	Sensitive	0.055329	0.616055	Sensitive	0.00298373	0.620969	Sensitive	0.000619722	0.612682
B2M	Sensitive	0.00386972	0.616055	Sensitive	0.0129901	0.620969	Sensitive	0.00386972	0.612682
ATR	Sensitive	0.0293164	0.616055	Sensitive	0.00708775	0.620969	Sensitive	0.00210901	0.612682
ZNF292	Sensitive	0.00854378	0.616055	Sensitive	0.00386953	0.620969	Sensitive	0.0172432	0.612682
CDKN2A	Resistant	0.551228	0.964841	Resistant	0.0058632	0.620969	Resistant	0.000199722	0.612682
SPRED2	Sensitive	0.00708916	0.616055	Sensitive	0.00708916	0.620969	Sensitive	0.0238648	0.612682
NOTCH3	Sensitive	0.00210943	0.616055	Sensitive	0.0129901	0.620969	Sensitive	0.0441194	0.612682
EIF4G1	Sensitive	0.0300129	0.616055	Sensitive	0.00708916	0.620969	Sensitive	0.0129901	0.612682
EHMT1	Sensitive	0.057154	0.616055	Sensitive	0.00708916	0.620969	Sensitive	0.00708916	0.612682
WDR90	Sensitive	0.0927922	0.616055	Sensitive	0.0185167	0.620969	Sensitive	0.00386972	0.612682
NLN	Sensitive	0.0129901	0.616055	Sensitive	0.0238648	0.620969	Sensitive	0.0238648	0.612682
PTPN13	Sensitive	0.0441194	0.616055	Sensitive	0.0238648	0.620969	Sensitive	0.0129901	0.612682
MTSS1L	Sensitive	0.0441194	0.616055	Sensitive	0.0238648	0.620969	Sensitive	0.0129901	0.612682
GLYR1	Sensitive	0.0826014	0.616055	Sensitive	0.0129901	0.620969	Sensitive	0.0129901	0.612682
CAD	Sensitive	0.0584577	0.616055	Sensitive	0.0185167	0.620969	Sensitive	0.0185167	0.612682
USP42	Sensitive	0.0488082	0.616055	Sensitive	0.198557	0.620969	Sensitive	0.00210933	0.612682
KDM4C	Sensitive	0.0441171	0.616055	Sensitive	0.0238636	0.620969	Sensitive	0.0238636	0.612682
GOLGA2	Sensitive	0.0441194	0.616055	Sensitive	0.0238648	0.620969	Sensitive	0.0238648	0.612682
VPRBP	Sensitive	0.0441194	0.616055	Sensitive	0.0238648	0.620969	Sensitive	0.0238648	0.612682
ARHGAP18	Sensitive	0.0238648	0.616055	Sensitive	0.0238648	0.620969	Sensitive	0.0441194	0.612682
HCFC1	Sensitive	0.00708564	0.616055	Sensitive	0.100232	0.620969	Sensitive	0.0441171	0.612682
ANKLE2	Sensitive	0.099161	0.616055	Sensitive	0.0533874	0.620969	Sensitive	0.00708916	0.612682
DCAF5	Sensitive	0.0238648	0.616055	Sensitive	0.0441194	0.620969	Sensitive	0.0441194	0.612682
TSPYL2	Sensitive	0.0441194	0.616055	Sensitive	0.0441194	0.620969	Sensitive	0.0238648	0.612682
DOCK5	Sensitive	0.0441194	0.616055	Sensitive	0.0441194	0.620969	Sensitive	0.0238648	0.612682
FNIP1	Sensitive	0.0238648	0.616055	Sensitive	0.0441194	0.620969	Sensitive	0.0441194	0.612682
C6orf132	Sensitive	0.0441194	0.616055	Sensitive	0.0238648	0.620969	Sensitive	0.0441194	0.612682
INTS10	Sensitive	0.0238648	0.616055	Sensitive	0.0826014	0.620969	Sensitive	0.0238648	0.612682
ABCA3	Sensitive	0.0238648	0.616055	Sensitive	0.0238648	0.620969	Sensitive	0.0826014	0.612682
BCLAF1	Sensitive	0.0238648	0.616055	Sensitive	0.0238648	0.620969	Sensitive	0.0826014	0.612682
ZNF48	Sensitive	0.168671	0.616055	Sensitive	0.0129901	0.620969	Sensitive	0.0238648	0.612682
NVL	Sensitive	0.0238648	0.616055	Sensitive	0.0927922	0.620969	Sensitive	0.0238648	0.612682
SNX19	Sensitive	0.0558746	0.616055	Sensitive	0.0129901	0.620969	Sensitive	0.0826014	0.612682
DSP	Sensitive	0.187146	0.616055	Sensitive	0.00988835	0.620969	Sensitive	0.0326548	0.612682
URB2	Sensitive	0.179713	0.616055	Sensitive	0.057154	0.620969	Sensitive	0.00708916	0.612682
ZNF202	Sensitive	0.266295	0.616055	Sensitive	0.0238648	0.620969	Sensitive	0.0129901	0.612682
DHX38	Sensitive	0.0441194	0.616055	Sensitive	0.0441194	0.620969	Sensitive	0.0441194	0.612682
ESRP1	Sensitive	0.0441194	0.616055	Sensitive	0.0441194	0.620969	Sensitive	0.0441194	0.612682
MZF1	Sensitive	0.0826014	0.616055	Sensitive	0.0238636	0.620969	Sensitive	0.0441194	0.612682
CLIP1	Sensitive	0.0826014	0.616055	Sensitive	0.0441194	0.620969	Sensitive	0.0238648	0.612682
STK17B	Sensitive	0.0441194	0.616055	Sensitive	0.0826014	0.620969	Sensitive	0.0238648	0.612682
KIF1C	Sensitive	0.0826014	0.616055	Sensitive	0.0238648	0.620969	Sensitive	0.0441194	0.612682
APC	Sensitive	0.0517395	0.616055	Sensitive	0.0471	0.620969	Sensitive	0.0367025	0.612682
CHD9	Sensitive	0.158636	0.616055	Sensitive	0.0238648	0.620969	Sensitive	0.0238648	0.612682
PHF2	Sensitive	0.0948776	0.616055	Sensitive	0.0238648	0.620969	Sensitive	0.0441194	0.612682
MET	Sensitive	0.175974	0.616055	Sensitive	0.0238648	0.620969	Sensitive	0.0238648	0.612682
SPTBN1	Sensitive	0.175974	0.616055	Sensitive	0.0238648	0.620969	Sensitive	0.0238648	0.612682
SNAPC4	Sensitive	0.0129901	0.616055	Sensitive	0.0441194	0.620969	Sensitive	0.179713	0.612682
SCAP	Sensitive	0.403658	0.761275	Sensitive	0.0129901	0.620969	Sensitive	0.0238648	0.612682
NEK9	Sensitive	0.0129901	0.616055	Sensitive	0.099161	0.620969	Sensitive	0.099161	0.612682
JAG1	Sensitive	0.0441194	0.616055	Sensitive	0.0826014	0.620969	Sensitive	0.0441194	0.612682
ACSL4	Sensitive	0.0441194	0.616055	Sensitive	0.0826014	0.620969	Sensitive	0.0441194	0.612682
INPP5A	Sensitive	0.0441194	0.616055	Sensitive	0.0826014	0.620969	Sensitive	0.0441194	0.612682
TBX3	Sensitive	0.0441194	0.616055	Sensitive	0.0826014	0.620969	Sensitive	0.0441194	0.612682
WFS1	Sensitive	0.0826014	0.616055	Sensitive	0.0441194	0.620969	Sensitive	0.0441194	0.612682
CHEK2	Sensitive	0.0441194	0.616055	Sensitive	0.0441194	0.620969	Sensitive	0.0826014	0.612682
SEC31B	Sensitive	0.0441194	0.616055	Sensitive	0.0826014	0.620969	Sensitive	0.0441194	0.612682
ACTR3B	Sensitive	0.0441194	0.616055	Sensitive	0.0826014	0.620969	Sensitive	0.0441194	0.612682
TRIM5	Sensitive	0.0826014	0.616055	Sensitive	0.0441194	0.620969	Sensitive	0.0441194	0.612682
TRIM4	Sensitive	0.0441194	0.616055	Sensitive	0.0826014	0.620969	Sensitive	0.0441194	0.612682
QSOX2	Sensitive	0.0441194	0.616055	Sensitive	0.0826014	0.620969	Sensitive	0.0441194	0.612682
ADAM15	Sensitive	0.0238648	0.616055	Sensitive	0.0826014	0.620969	Sensitive	0.0826014	0.612682
PDS5A	Sensitive	0.306469	0.616055	Sensitive	0.0238648	0.620969	Sensitive	0.0238648	0.612682
PLCG1	Sensitive	0.172293	0.616055	Sensitive	0.0238648	0.620969	Sensitive	0.0441194	0.612682
C8orf76	Sensitive	0.0238648	0.616055	Sensitive	0.0441194	0.620969	Sensitive	0.172293	0.612682
ZNF180	Sensitive	0.0584577	0.616055	Sensitive	0.198557	0.620969	Sensitive	0.0156696	0.612682
FRYL	Sensitive	0.0441194	0.616055	Sensitive	0.0238636	0.620969	Sensitive	0.175974	0.612682
SERPINH1	Sensitive	0.175974	0.616055	Sensitive	0.0238648	0.620969	Sensitive	0.0441194	0.612682
STK10	Sensitive	0.0238648	0.616055	Sensitive	0.175974	0.620969	Sensitive	0.0441194	0.612682
HEATR5A	Sensitive	0.0706122	0.616055	Sensitive	0.0878071	0.620969	Sensitive	0.0300315	0.612682
GOLGA4	Sensitive	0.0238648	0.616055	Sensitive	0.0948776	0.620969	Sensitive	0.0826014	0.612682
TJP1	Sensitive	0.175974	0.616055	Sensitive	0.0826014	0.620969	Sensitive	0.0129901	0.612682
AP2A1	Sensitive	0.0441194	0.616055	Sensitive	0.179713	0.620969	Sensitive	0.0238648	0.612682
MORC2	Sensitive	0.099161	0.616055	Sensitive	0.0441194	0.620969	Sensitive	0.0441194	0.612682
TOM1	Sensitive	0.18351	0.616055	Sensitive	0.0441194	0.620969	Sensitive	0.0238648	0.612682
FAM217B	Sensitive	0.18351	0.616055	Sensitive	0.0238648	0.620969	Sensitive	0.0441194	0.612682
CAMSAP3	Sensitive	0.0826014	0.616055	Sensitive	0.10136	0.620969	Sensitive	0.0238648	0.612682
GPR125	Sensitive	0.195657	0.616055	Sensitive	0.0329388	0.620969	Sensitive	0.0321854	0.612682
NDOR1	Sensitive	0.0578013	0.616055	Sensitive	0.18351	0.620969	Sensitive	0.0238636	0.612682
RPUSD2	Sensitive	0.0825971	0.616055	Sensitive	0.0441171	0.620969	Sensitive	0.0825971	0.612682
XIAP	Sensitive	0.0826014	0.616055	Sensitive	0.0441194	0.620969	Sensitive	0.0826014	0.612682
KLF5	Sensitive	0.0826014	0.616055	Sensitive	0.0826014	0.620969	Sensitive	0.0441194	0.612682
VCAN	Resistant	0.0441194	0.616055	Resistant	0.0826014	0.620969	Resistant	0.0826014	0.612682
CD46	Sensitive	0.0441194	0.616055	Sensitive	0.0826014	0.620969	Sensitive	0.0826014	0.612682
DNAJB9	Sensitive	0.0826014	0.616055	Sensitive	0.0441194	0.620969	Sensitive	0.0826014	0.612682
PC	Sensitive	0.0441194	0.616055	Sensitive	0.0826014	0.620969	Sensitive	0.0826014	0.612682
SUPT5H	Sensitive	0.0826014	0.616055	Sensitive	0.0826014	0.620969	Sensitive	0.0441194	0.612682
UBE4A	Sensitive	0.0441194	0.616055	Sensitive	0.0826014	0.620969	Sensitive	0.0826014	0.612682
ATP9A	Sensitive	0.0441194	0.616055	Sensitive	0.0826014	0.620969	Sensitive	0.0826014	0.612682
INTS6	Sensitive	0.0441194	0.616055	Sensitive	0.0826014	0.620969	Sensitive	0.0826014	0.612682
TUBG2	Sensitive	0.0441194	0.616055	Sensitive	0.0826014	0.620969	Sensitive	0.0826014	0.612682
ARVCF	Sensitive	0.0441194	0.616055	Sensitive	0.158636	0.620969	Sensitive	0.0441194	0.612682
PASK	Sensitive	0.0441194	0.616055	Sensitive	0.0441194	0.620969	Sensitive	0.158636	0.612682
VPS39	Sensitive	0.0441194	0.616055	Sensitive	0.158636	0.620969	Sensitive	0.0441194	0.612682
EXOC4	Sensitive	0.158636	0.616055	Sensitive	0.0441194	0.620969	Sensitive	0.0441194	0.612682
KIAA2018	Resistant	0.158636	0.616055	Resistant	0.0441194	0.620969	Resistant	0.0441194	0.612682
NSUN6	Sensitive	0.158636	0.616055	Sensitive	0.0441194	0.620969	Sensitive	0.0441194	0.612682
TMEM104	Sensitive	0.158636	0.616055	Sensitive	0.0826014	0.620969	Sensitive	0.0238648	0.612682
TIMM17B	Sensitive	0.566219	0.964841	Sensitive	0.0238636	0.620969	Sensitive	0.0238636	0.612682
CHPF2	Sensitive	0.306464	0.616055	Sensitive	0.0238636	0.620969	Sensitive	0.0441171	0.612682
DYNC1H1	Sensitive	0.689018	1	Sensitive	0.0293173	0.620969	Sensitive	0.0160512	0.612682
MAN2B2	Sensitive	0.0441194	0.616055	Sensitive	0.172293	0.620969	Sensitive	0.0441194	0.612682
CNTROB	Sensitive	0.318877	0.616055	Sensitive	0.0238648	0.620969	Sensitive	0.0441194	0.612682
ABCC1	Sensitive	0.0441194	0.616055	Sensitive	0.18351	0.620969	Sensitive	0.0441194	0.612682
INADL	Sensitive	0.18351	0.616055	Sensitive	0.0441194	0.620969	Sensitive	0.0441194	0.612682
TONSL	Sensitive	0.099161	0.616055	Sensitive	0.0826014	0.620969	Sensitive	0.0441194	0.612682
DLG5	Sensitive	0.0836508	0.616055	Sensitive	0.0497714	0.620969	Sensitive	0.0871861	0.612682
ATRX	Sensitive	0.0521773	0.616055	Sensitive	0.249667	0.620969	Sensitive	0.0286348	0.612682
NUP98	Sensitive	0.0441194	0.616055	Sensitive	0.0129901	0.620969	Sensitive	0.654721	1
VPS13C	Sensitive	0.480959	0.899206	Sensitive	0.0238648	0.620969	Sensitive	0.0329388	0.612682
FASN	Resistant	0.0238648	0.616055	Resistant	0.168671	0.620969	Resistant	0.099161	0.612682
POLD1	Sensitive	0.18351	0.616055	Sensitive	0.18351	0.620969	Sensitive	0.0129901	0.612682
ALMS1	Sensitive	0.0970004	0.616055	Sensitive	0.0329388	0.620969	Sensitive	0.154611	0.612682
KRT6C	Resistant	0.0558746	0.616055	Resistant	0.0238648	0.620969	Resistant	0.409674	0.767755
ZNF71	Sensitive	0.0441171	0.616055	Sensitive	0.158636	0.620969	Sensitive	0.0825971	0.612682
TTLL3	Sensitive	0.0441171	0.616055	Sensitive	0.0825971	0.620969	Sensitive	0.158636	0.612682
PTPRG	Sensitive	0.0826014	0.616055	Sensitive	0.158636	0.620969	Sensitive	0.0441194	0.612682
TLE2	Sensitive	0.0441194	0.616055	Sensitive	0.0826014	0.620969	Sensitive	0.158636	0.612682
ZNF37A	Sensitive	0.0441194	0.616055	Sensitive	0.0826014	0.620969	Sensitive	0.158636	0.612682
SLMAP	Sensitive	0.158636	0.616055	Sensitive	0.0826014	0.620969	Sensitive	0.0441194	0.612682
TRAFD1	Sensitive	0.0826014	0.616055	Sensitive	0.158636	0.620969	Sensitive	0.0441194	0.612682
SUN1	Sensitive	0.158636	0.616055	Sensitive	0.0826014	0.620969	Sensitive	0.0441194	0.612682
DPP7	Sensitive	0.0441194	0.616055	Sensitive	0.0826014	0.620969	Sensitive	0.158636	0.612682
UGGT1	Sensitive	0.158636	0.616055	Sensitive	0.0441194	0.620969	Sensitive	0.0826014	0.612682
ATG9A	Sensitive	0.158636	0.616055	Sensitive	0.0826014	0.620969	Sensitive	0.0441194	0.612682
FYCO1	Sensitive	0.158636	0.616055	Sensitive	0.0826014	0.620969	Sensitive	0.0441194	0.612682
TNKS1BP1	Sensitive	0.158636	0.616055	Sensitive	0.0441194	0.620969	Sensitive	0.0826014	0.612682
SIX5	Sensitive	0.158636	0.616055	Sensitive	0.0826014	0.620969	Sensitive	0.0441194	0.612682
AKAP12	Sensitive	0.306469	0.616055	Sensitive	0.0441194	0.620969	Sensitive	0.0441194	0.612682
ARHGAP19	Sensitive	0.306469	0.616055	Sensitive	0.0441194	0.620969	Sensitive	0.0441194	0.612682
HTT	Sensitive	0.328069	0.621271	Sensitive	0.0185167	0.620969	Sensitive	0.100045	0.612682
EFCAB14	Sensitive	0.312632	0.616055	Sensitive	0.0441194	0.620969	Sensitive	0.0441194	0.612682
LYAR	Sensitive	0.312632	0.616055	Sensitive	0.0441194	0.620969	Sensitive	0.0441194	0.612682
B4GALT1	Sensitive	0.0441194	0.616055	Sensitive	0.168671	0.620969	Sensitive	0.0826014	0.612682
FRAS1	Sensitive	0.172293	0.616055	Sensitive	0.0826014	0.620969	Sensitive	0.0441194	0.612682
FAM21A	Sensitive	0.172293	0.616055	Sensitive	0.0826014	0.620969	Sensitive	0.0441194	0.612682
PAPSS1	Sensitive	0.0238648	0.616055	Sensitive	0.318877	0.620969	Sensitive	0.0826014	0.612682
KARS	Sensitive	0.0441194	0.616055	Sensitive	0.0441194	0.620969	Sensitive	0.323555	0.612682
METTL22	Sensitive	0.0441194	0.616055	Sensitive	0.0441194	0.620969	Sensitive	0.323555	0.612682
NFKBIB	Sensitive	0.325202	0.616055	Sensitive	0.0441194	0.620969	Sensitive	0.0441194	0.612682
ADNP2	Sensitive	0.325202	0.616055	Sensitive	0.0441194	0.620969	Sensitive	0.0441194	0.612682
ZNF75D	Sensitive	0.323555	0.616055	Sensitive	0.0825843	0.620969	Sensitive	0.023841	0.612682
DOK1	Sensitive	0.175974	0.616055	Sensitive	0.0441194	0.620969	Sensitive	0.0826014	0.612682
EXO1	Sensitive	0.0826014	0.616055	Sensitive	0.0441194	0.620969	Sensitive	0.175974	0.612682
KIAA1211	Sensitive	0.175974	0.616055	Sensitive	0.0826014	0.620969	Sensitive	0.0441194	0.612682
FOXK1	Sensitive	0.0129901	0.616055	Sensitive	0.18351	0.620969	Sensitive	0.270569	0.612682
ARHGAP4	Sensitive	0.0826014	0.616055	Sensitive	0.179713	0.620969	Sensitive	0.0441194	0.612682
SNRK	Sensitive	0.0826014	0.616055	Sensitive	0.18351	0.620969	Sensitive	0.0441194	0.612682
ANKHD1	Sensitive	0.646357	1	Sensitive	0.0238648	0.620969	Sensitive	0.0441194	0.612682
TGOLN2	Sensitive	0.680072	1	Sensitive	0.0238648	0.620969	Sensitive	0.0441194	0.612682
DYRK2	Sensitive	0.0441194	0.616055	Sensitive	0.1816	0.620969	Sensitive	0.102471	0.612682
PCNX	Sensitive	0.207443	0.616055	Sensitive	0.0857288	0.620969	Sensitive	0.0470924	0.612682
DDX28	Sensitive	0.434265	0.812872	Sensitive	0.0441194	0.620969	Sensitive	0.0441194	0.612682
NUMA1	Resistant	0.629763	1	Resistant	0.0129901	0.620969	Resistant	0.103597	0.612682
AIM1	Sensitive	0.556177	0.964841	Resistant	0.0441171	0.620969	Resistant	0.0441171	0.612682
N4BP1	Sensitive	0.566219	0.964841	Sensitive	0.0441194	0.620969	Sensitive	0.0441194	0.612682
SIRT3	Sensitive	0.566219	0.964841	Sensitive	0.0441194	0.620969	Sensitive	0.0441194	0.612682
ND5	Resistant	0.108495	0.616055	Resistant	0.624332	1	Resistant	0.0163451	0.612682
SPECC1	Sensitive	0.158636	0.616055	Sensitive	0.0441171	0.620969	Sensitive	0.158636	0.612682
ZNHIT2	Sensitive	0.0441194	0.616055	Sensitive	0.158636	0.620969	Sensitive	0.158636	0.612682
ZBTB7A	Sensitive	0.0441194	0.616055	Sensitive	0.158636	0.620969	Sensitive	0.158636	0.612682
SNRNP200	Sensitive	0.306469	0.616055	Sensitive	0.0826014	0.620969	Sensitive	0.0441194	0.612682
ANO8	Sensitive	0.0441194	0.616055	Sensitive	0.306469	0.620969	Sensitive	0.0826014	0.612682
BMS1	Sensitive	0.312632	0.616055	Sensitive	0.0441194	0.620969	Sensitive	0.0826014	0.612682
TBK1	Sensitive	0.0441194	0.616055	Sensitive	0.0826014	0.620969	Sensitive	0.312632	0.612682
VWA1	Sensitive	0.0441194	0.616055	Sensitive	0.312632	0.620969	Sensitive	0.0826014	0.612682
TET2	Sensitive	0.0238636	0.616055	Sensitive	0.158636	0.620969	Sensitive	0.306469	0.612682
GTF3C1	Sensitive	0.0441194	0.616055	Sensitive	0.0826014	0.620969	Sensitive	0.318877	0.612682
KANK2	Sensitive	0.318877	0.616055	Sensitive	0.0826014	0.620969	Sensitive	0.0441194	0.612682
CSPP1	Sensitive	0.318877	0.616055	Sensitive	0.0826014	0.620969	Sensitive	0.0441194	0.612682
NUP214	Sensitive	0.0441171	0.616055	Sensitive	0.322024	0.620969	Sensitive	0.0826014	0.612682
ABTB2	Sensitive	0.323555	0.616055	Sensitive	0.0826014	0.620969	Sensitive	0.0441194	0.612682
MAGEF1	Sensitive	0.0441194	0.616055	Sensitive	0.323555	0.620969	Sensitive	0.0826014	0.612682
BTN3A1	Sensitive	0.0441194	0.616055	Sensitive	0.0826014	0.620969	Sensitive	0.325202	0.612682
MTIF2	Sensitive	0.0441194	0.616055	Sensitive	0.325202	0.620969	Sensitive	0.0826014	0.612682
ITSN2	Sensitive	0.0129901	0.616055	Sensitive	0.249667	0.620969	Sensitive	0.415743	0.778466
STAM2	Sensitive	0.175974	0.616055	Sensitive	0.0441194	0.620969	Sensitive	0.175974	0.612682
NSD1	Sensitive	0.0325593	0.616055	Sensitive	0.099161	0.620969	Sensitive	0.428039	0.800265
DICER1	Sensitive	0.385931	0.729967	Sensitive	0.0441194	0.620969	Sensitive	0.0826014	0.612682
KIAA0586	Sensitive	0.325202	0.616055	Sensitive	0.18351	0.620969	Sensitive	0.0238648	0.612682
C2orf44	Sensitive	0.325202	0.616055	Sensitive	0.0238648	0.620969	Sensitive	0.18351	0.612682
PI4KA	Sensitive	0.391786	0.740661	Sensitive	0.0826014	0.620969	Sensitive	0.0441194	0.612682
PRSS3	Sensitive	0.0441194	0.616055	Sensitive	0.0826014	0.620969	Sensitive	0.391786	0.736866
ZNF107	Sensitive	0.0441194	0.616055	Sensitive	0.1816	0.620969	Sensitive	0.1816	0.612682
FAM83D	Sensitive	0.103597	0.616055	Sensitive	0.325202	0.620969	Sensitive	0.0441194	0.612682
MYCBP2	Sensitive	0.0101303	0.616055	Sensitive	0.319467	0.620969	Sensitive	0.506877	0.943497
CRYBG3	Sensitive	0.253754	0.616055	Sensitive	0.253754	0.620969	Sensitive	0.0266808	0.612682
FLNB	Sensitive	0.556149	0.964841	Sensitive	0.0947312	0.620969	Sensitive	0.0329388	0.612682
TAF5L	Sensitive	0.0441194	0.616055	Sensitive	0.10136	0.620969	Sensitive	0.409674	0.767755
USP20	Sensitive	0.994836	1	Resistant	0.0441194	0.620969	Resistant	0.0441194	0.612682
MALT1	Resistant	1	1	Resistant	0.0826014	0.620969	Resistant	0.0238636	0.612682
MAGI1	Sensitive	0.0238648	0.616055	Sensitive	0.0826014	0.620969	Resistant	1	1
KDM6B	Sensitive	0.0441194	0.616055	Sensitive	0.556177	0.973275	Sensitive	0.0826014	0.612682
USP9X	Sensitive	0.0129895	0.616055	Sensitive	0.158636	0.620969	Resistant	0.994836	1
PIK3R1	Sensitive	0.566219	0.964841	Sensitive	0.0441194	0.620969	Sensitive	0.0826014	0.612682
EXPH5	Sensitive	0.0826014	0.616055	Sensitive	0.566219	0.973275	Sensitive	0.0441194	0.612682
DHX37	Sensitive	0.566219	0.964841	Sensitive	0.0826014	0.620969	Sensitive	0.0441194	0.612682
MESDC1	Resistant	0.566219	0.964841	Resistant	0.0441194	0.620969	Resistant	0.0826014	0.612682
MAT2B	Sensitive	0.0826014	0.616055	Sensitive	0.0441194	0.620969	Sensitive	0.566219	0.968374
PIGS	Sensitive	0.576346	0.964841	Sensitive	0.0441194	0.620969	Sensitive	0.0826014	0.612682
KDM5B	Sensitive	0.158636	0.616055	Sensitive	0.556177	0.973275	Sensitive	0.0238648	0.612682
RTF1	Sensitive	0.158636	0.616055	Sensitive	0.306469	0.620969	Sensitive	0.0441194	0.612682
TMEM201	Sensitive	0.0441104	0.616055	Sensitive	0.318856	0.620969	Sensitive	0.158627	0.612682
ZC3H4	Sensitive	0.318877	0.616055	Sensitive	0.0441194	0.620969	Sensitive	0.158636	0.612682
UBR5	Sensitive	0.0441194	0.616055	Sensitive	0.318877	0.620969	Sensitive	0.158636	0.612682
ASCC2	Sensitive	0.318877	0.616055	Sensitive	0.0441194	0.620969	Sensitive	0.158636	0.612682
BAZ2A	Sensitive	0.0238648	0.616055	Sensitive	0.306469	0.620969	Sensitive	0.306469	0.612682
BTBD7	Sensitive	0.0441194	0.616055	Sensitive	0.158636	0.620969	Sensitive	0.323555	0.612682
FAM189B	Resistant	0.0441194	0.616055	Resistant	0.158636	0.620969	Resistant	0.325202	0.612682
TJP2	Sensitive	0.158636	0.616055	Sensitive	0.325202	0.620969	Sensitive	0.0441194	0.612682
TRAPPC8	Sensitive	0.325202	0.616055	Sensitive	0.158636	0.620969	Sensitive	0.0441194	0.612682
HSPH1	Sensitive	0.168671	0.616055	Sensitive	0.0441194	0.620969	Sensitive	0.306469	0.612682
ATP11A	Sensitive	0.168671	0.616055	Sensitive	0.0238648	0.620969	Sensitive	0.576346	0.968374
SEC23IP	Sensitive	0.556177	0.964841	Sensitive	0.0238648	0.620969	Sensitive	0.175974	0.612682
ERBB2	Resistant	0.566219	0.964841	Resistant	0.0948776	0.620969	Resistant	0.0441194	0.612682
ARHGEF18	Sensitive	0.0441194	0.616055	Sensitive	0.312632	0.620969	Sensitive	0.172293	0.612682
SMG6	Sensitive	0.0826014	0.616055	Sensitive	0.65471	1	Sensitive	0.0441171	0.612682
CHD2	Sensitive	0.654721	1	Sensitive	0.0826014	0.620969	Sensitive	0.0441194	0.612682
VPS11	Sensitive	0.654666	1	Sensitive	0.158627	0.620969	Sensitive	0.023841	0.612682
ABCA2	Sensitive	0.415743	0.781123	Sensitive	0.253754	0.620969	Sensitive	0.0238648	0.612682
RPAP2	Sensitive	0.415743	0.781123	Sensitive	0.253754	0.620969	Sensitive	0.0238648	0.612682
BCL9L	Sensitive	0.576346	0.964841	Sensitive	0.0238648	0.620969	Sensitive	0.18351	0.612682
VPS26B	Sensitive	0.0441194	0.616055	Sensitive	0.325202	0.620969	Sensitive	0.179713	0.612682
ND1	Resistant	0.165644	0.616055	Resistant	0.663129	1	Resistant	0.0238648	0.612682
ARHGEF16	Sensitive	0.0441194	0.616055	Sensitive	0.18351	0.620969	Sensitive	0.325202	0.612682
ZFHX3	Resistant	0.646357	1	Resistant	0.099161	0.620969	Resistant	0.0441194	0.612682
GPBP1	Sensitive	0.0441194	0.616055	Sensitive	0.409674	0.778756	Sensitive	0.158636	0.612682
DARS2	Sensitive	0.0238648	0.616055	Sensitive	0.18351	0.620969	Sensitive	0.654721	1
HLA-G	Resistant	0.680072	1	Resistant	0.0441194	0.620969	Resistant	0.099161	0.612682
ASCC3	Sensitive	0.162832	0.616055	Sensitive	0.768879	1	Sensitive	0.0238648	0.612682
NFATC3	Sensitive	0.0441194	0.616055	Sensitive	0.397692	0.757817	Sensitive	0.172293	0.612682
PPP1R26	Resistant	0.778951	1	Resistant	0.0187085	0.620969	Resistant	0.21046	0.612682
SREBF1	Sensitive	0.415743	0.781123	Sensitive	0.312632	0.620969	Sensitive	0.0238648	0.612682
UNC13B	Sensitive	0.434262	0.812872	Sensitive	0.18351	0.620969	Sensitive	0.0441171	0.612682
SNX5	Sensitive	0.0441194	0.616055	Resistant	0.994836	1	Resistant	0.0826014	0.612682
FUBP1	Sensitive	1	1	Sensitive	0.0826014	0.620969	Sensitive	0.0441194	0.612682
AP1B1	Resistant	1	1	Resistant	0.158636	0.620969	Resistant	0.0238648	0.612682
AXIN1	Sensitive	0.158636	0.616055	Sensitive	0.566219	0.973275	Sensitive	0.0441194	0.612682
FAM115A	Sensitive	0.0441194	0.616055	Sensitive	0.566219	0.973275	Sensitive	0.158636	0.612682
ENDOD1	Sensitive	0.0441194	0.616055	Sensitive	0.158636	0.620969	Sensitive	0.576346	0.968374
CENPB	Sensitive	0.306469	0.616055	Sensitive	0.0441194	0.620969	Sensitive	0.306469	0.612682
DIS3L2	Sensitive	0.312632	0.616055	Sensitive	0.0238648	0.620969	Sensitive	0.556177	0.968374
RAF1	Resistant	0.984508	1	Resistant	0.0238648	0.620969	Resistant	0.179713	0.612682
TBC1D2B	Sensitive	0.0441194	0.616055	Sensitive	0.312632	0.620969	Sensitive	0.312632	0.612682
PHIP	Sensitive	0.0441194	0.616055	Sensitive	0.306469	0.620969	Sensitive	0.325202	0.612682
KIAA1244	Sensitive	0.179713	0.616055	Sensitive	0.0441194	0.620969	Resistant	0.556177	0.968374
PDP1	Sensitive	0.318877	0.616055	Sensitive	0.318877	0.620969	Sensitive	0.0441194	0.612682
EHD1	Sensitive	0.566219	0.964841	Sensitive	0.0441194	0.620969	Sensitive	0.179713	0.612682
ZZZ3	Resistant	0.994836	1	Resistant	0.0441194	0.620969	Resistant	0.103597	0.612682
FAM83G	Sensitive	0.0441194	0.616055	Sensitive	0.323555	0.620969	Sensitive	0.323555	0.612682
HERC1	Resistant	0.974108	1	Resistant	0.0307226	0.620969	Resistant	0.154611	0.612682
MYO1C	Resistant	0.663129	1	Resistant	0.158636	0.620969	Resistant	0.0441194	0.612682
HEBP1	Sensitive	0.0441194	0.616055	Sensitive	0.323555	0.620969	Sensitive	0.325202	0.612682
JMJD8	Sensitive	0.325202	0.616055	Sensitive	0.0441194	0.620969	Sensitive	0.325202	0.612682
ALS2	Sensitive	0.696309	1	Sensitive	0.0441194	0.620969	Sensitive	0.172293	0.612682
KNTC1	Sensitive	0.0441194	0.616055	Sensitive	0.325202	0.620969	Sensitive	0.434265	0.810667
PIEZO1	Sensitive	0.0476354	0.616055	Sensitive	0.206777	0.620969	Sensitive	0.635752	1
KLF10	Sensitive	0.984508	1	Sensitive	0.0441194	0.620969	Sensitive	0.158636	0.612682
N4BP2L2	Resistant	0.984508	1	Resistant	0.158636	0.620969	Resistant	0.0441194	0.612682
PLEKHH1	Sensitive	0.994836	1	Sensitive	0.158636	0.620969	Sensitive	0.0441194	0.612682
ARHGAP39	Sensitive	0.994836	1	Sensitive	0.0441194	0.620969	Sensitive	0.158636	0.612682
USP40	Resistant	0.172293	0.616055	Resistant	0.984508	1	Resistant	0.0441171	0.612682
ELMO2	Sensitive	0.306469	0.616055	Sensitive	0.0441194	0.620969	Sensitive	0.556177	0.968374
ZNF354A	Sensitive	0.994836	1	Sensitive	0.0238648	0.620969	Sensitive	0.318877	0.612682
FBXW5	Sensitive	0.0441194	0.616055	Sensitive	0.172293	0.620969	Resistant	1	1
STXBP5	Sensitive	0.312632	0.616055	Sensitive	0.0441194	0.620969	Sensitive	0.556177	0.968374
MGA	Resistant	0.718351	1	Resistant	0.325202	0.620969	Resistant	0.0329388	0.612682
ANKRD52	Sensitive	0.576346	0.964841	Sensitive	0.0441194	0.620969	Resistant	0.312632	0.612682
FAM21C	Sensitive	0.566219	0.964841	Sensitive	0.318877	0.620969	Sensitive	0.0441194	0.612682
ANKRD18A	Sensitive	0.0441104	0.616055	Sensitive	0.571266	0.973275	Sensitive	0.318856	0.612682
KIAA1217	Sensitive	0.0441194	0.616055	Sensitive	0.318877	0.620969	Sensitive	0.576346	0.968374
KIAA1551	Sensitive	0.0441194	0.616055	Sensitive	0.325202	0.620969	Resistant	0.566219	0.968374
DYM	Sensitive	0.0441171	0.616055	Sensitive	0.576346	0.973275	Sensitive	0.325197	0.612682
NCOR1	Sensitive	0.325202	0.616055	Sensitive	0.0441194	0.620969	Sensitive	0.576346	0.968374
TBC1D23	Sensitive	0.0441194	0.616055	Sensitive	0.325202	0.620969	Sensitive	0.576346	0.968374
MICAL3	Sensitive	0.262065	0.616055	Sensitive	0.0321844	0.620969	Resistant	0.983025	1
SMAD6	Sensitive	0.312632	0.616055	Sensitive	0.0441194	0.620969	Sensitive	0.646357	1
NMRAL1	Sensitive	0.646357	1	Sensitive	0.0441194	0.620969	Sensitive	0.318877	0.612682
FASTKD1	Sensitive	0.663129	1	Sensitive	0.318877	0.620969	Sensitive	0.0441194	0.612682
TAF1	Sensitive	0.671569	1	Sensitive	0.0441171	0.620969	Sensitive	0.322024	0.612682
ZNFX1	Sensitive	0.415743	0.781123	Resistant	0.556177	0.973275	Resistant	0.0441194	0.612682
TFIP11	Resistant	0.995756	1	Resistant	0.237678	0.620969	Resistant	0.0441194	0.612682
PAXIP1	Sensitive	0.0441194	0.616055	Sensitive	0.421864	0.799445	Sensitive	0.576346	0.968374
ZNF28	Resistant	0.0441171	0.616055	Resistant	0.409674	0.778756	Resistant	0.629763	1
KDM3B	Sensitive	0.0441194	0.616055	Sensitive	0.312632	0.620969	Resistant	1	1
TECPR1	Sensitive	0.0441194	0.616055	Sensitive	0.556177	0.973275	Sensitive	0.566219	0.968374
DEF8	Sensitive	0.0441194	0.616055	Sensitive	0.556177	0.973275	Sensitive	0.566219	0.968374
BAG3	Sensitive	0.556177	0.964841	Sensitive	0.0441194	0.620969	Sensitive	0.576346	0.968374
C1orf106	Sensitive	0.325202	0.616055	Resistant	0.994836	1	Resistant	0.0441194	0.612682
CCAR1	Sensitive	0.0441194	0.616055	Resistant	1	1	Resistant	0.323555	0.612682
USO1	Sensitive	0.576346	0.964841	Sensitive	0.576346	0.973275	Sensitive	0.0441194	0.612682
RIN1	Sensitive	0.576346	0.964841	Sensitive	0.576346	0.973275	Sensitive	0.0441194	0.612682
SLC35E2B	Sensitive	0.0441194	0.616055	Sensitive	0.576346	0.973275	Sensitive	0.576346	0.968374
NFKB1	Resistant	0.663129	1	Resistant	0.0441194	0.620969	Resistant	0.556177	0.968374
CTNND1	Sensitive	0.663129	1	Sensitive	0.576346	0.973275	Sensitive	0.0441194	0.612682
ARHGAP21	Sensitive	0.663129	1	Sensitive	0.0441194	0.620969	Sensitive	0.671579	1
SBF1	Sensitive	0.556172	0.964841	Sensitive	0.984508	1	Sensitive	0.0441171	0.612682
STX18	Sensitive	0.0441194	0.616055	Sensitive	0.556177	0.973275	Sensitive	0.984508	1
REV3L	Resistant	0.987268	1	Resistant	0.0441171	0.620969	Resistant	0.556177	0.968374
NEO1	Sensitive	1	1	Sensitive	0.0441194	0.620969	Sensitive	0.556177	0.968374
ATP7B	Sensitive	0.994836	1	Sensitive	0.0441194	0.620969	Resistant	0.566219	0.968374
C16orf59	Sensitive	0.576346	0.964841	Resistant	0.984508	1	Resistant	0.0441194	0.612682
SUGP1	Sensitive	0.0441194	0.616055	Resistant	1	1	Resistant	0.576346	0.968374
IGSF8	Resistant	1	1	Resistant	0.0441194	0.620969	Resistant	0.576346	0.968374
ATXN2L	Resistant	1	1	Resistant	0.629763	1	Resistant	0.0441194	0.612682
ZNF770	Resistant	0.680072	1	Resistant	1	1	Resistant	0.0441194	0.612682
LPHN2	Resistant	0.984508	1	Resistant	0.984508	1	Resistant	0.0441194	0.612682
TOP3A	Sensitive	1	1	Resistant	0.0441194	0.620969	Resistant	1	1
ITFG3	Sensitive	0.0441194	0.616055	Resistant	1	1	Resistant	1	1
TENM2	Sensitive	0.178051	0.584284	Sensitive	0.0448839	0.543057	Sensitive	0.178051	0.560105
DHX32	Sensitive	0.0246817	0.584284	Sensitive	0.179712	0.543057	Sensitive	0.320794	0.560105
GABBR1	Sensitive	0.320794	0.584284	Sensitive	0.179712	0.543057	Sensitive	0.0246817	0.560105
VARS2	Sensitive	0.181386	0.584284	Sensitive	0.0246817	0.543057	Sensitive	0.320794	0.560105
XRN2	Resistant	0.179712	0.584284	Resistant	0.0448839	0.543057	Resistant	0.178051	0.560105
ACAD10	Sensitive	0.704649	1	Sensitive	0.149085	0.543057	Sensitive	0.0137106	0.560105
USP40	Resistant	0.151398	0.584284	Resistant	0.698189	0.939335	Resistant	0.0137105	0.560105
KIAA2018	Resistant	0.0448839	0.584284	Resistant	0.179712	0.543057	Resistant	0.179712	0.560105
ALS2	Resistant	0.260977	0.584284	Resistant	0.0137106	0.543057	Resistant	0.406868	0.702262
APMAP	Sensitive	0.0448839	0.584284	Sensitive	0.181386	0.543057	Sensitive	0.181386	0.560105
FAM83D	Sensitive	0.181386	0.584284	Sensitive	0.181386	0.543057	Sensitive	0.0448839	0.560105
ACTR3B	Sensitive	0.102966	0.584284	Sensitive	0.0448839	0.543057	Sensitive	0.320794	0.560105
NFXL1	Resistant	0.0448839	0.584284	Resistant	0.08297	0.543057	Resistant	0.412205	0.7066
CCDC66	Resistant	0.0448839	0.584284	Resistant	0.416234	0.688697	Resistant	0.08297	0.560105
CTDP1	Sensitive	0.738885	1	Sensitive	0.0108316	0.543057	Sensitive	0.198783	0.560105
VPS13C	Sensitive	0.771706	1	Sensitive	0.0435097	0.543057	Sensitive	0.0489763	0.560105
SRCAP	Resistant	0.995989	1	Resistant	0.450547	0.739298	Resistant	0.00378505	0.560105
IBTK	Resistant	0.1764	0.584284	Resistant	0.0318082	0.543057	Resistant	0.312474	0.560105
PASK	Sensitive	0.0448839	0.584284	Sensitive	0.0948199	0.543057	Sensitive	0.413545	0.708236
TANC2	Resistant	0.0448835	0.584284	Resistant	0.0980992	0.543057	Resistant	0.401572	0.696505
KANK2	Sensitive	0.406868	0.732815	Sensitive	0.0980997	0.543057	Sensitive	0.0448839	0.560105
DIAPH1	Resistant	0.179712	0.584284	Resistant	0.412205	0.685783	Resistant	0.0246817	0.560105
HSPG2	Sensitive	0.0375948	0.584284	Sensitive	0.0875086	0.543057	Sensitive	0.583711	0.841889
GSE1	Sensitive	0.605325	0.903842	Sensitive	0.246697	0.543057	Sensitive	0.0128682	0.560105
PTPRU	Sensitive	0.417583	0.739059	Sensitive	0.0448839	0.543057	Sensitive	0.102966	0.560105
KLHL36	Sensitive	0.102966	0.584284	Sensitive	0.0448839	0.543057	Sensitive	0.417583	0.709963
SIPA1L3	Resistant	0.00766603	0.584284	Resistant	0.255473	0.543057	Resistant	0.996251	1
EXPH5	Sensitive	0.0448839	0.584284	Resistant	0.99771	1	Resistant	0.0448839	0.560105
ZDHHC23	Resistant	1	1	Resistant	0.0448835	0.543057	Resistant	0.0448835	0.560105
GLI3	Sensitive	0.0448839	0.584284	Sensitive	1	1	Sensitive	0.0448839	0.560105
NKIRAS2	Sensitive	1	1	Sensitive	0.0448839	0.543057	Sensitive	0.0448839	0.560105
SLC9A1	Sensitive	0.08297	0.584284	Resistant	0.985003	1	Resistant	0.0246817	0.560105
STX18	Sensitive	0.0246817	0.584284	Sensitive	0.1764	0.543057	Sensitive	0.46754	0.789775
EPHB6	Sensitive	0.08297	0.584284	Sensitive	0.0246815	0.543057	Resistant	1	1
OSBP	Sensitive	0.0246817	0.584284	Sensitive	0.08297	0.543057	Sensitive	1	1
HDHD2	Resistant	1	1	Resistant	0.08297	0.543057	Resistant	0.0246817	0.560105
ALMS1	Sensitive	0.482679	0.845572	Sensitive	0.0334694	0.543057	Sensitive	0.127476	0.560105
KIF1C	Sensitive	0.414889	0.73761	Sensitive	0.0311637	0.543057	Sensitive	0.160928	0.560105
KCMF1	Resistant	0.0448839	0.584284	Resistant	0.08297	0.543057	Resistant	0.560355	0.82143
SERINC1	Sensitive	0.560355	0.850978	Sensitive	0.08297	0.543057	Sensitive	0.0448839	0.560105
EDC3	Sensitive	0.560355	0.850978	Sensitive	0.08297	0.543057	Sensitive	0.0448839	0.560105
AGPAT9	Sensitive	0.560355	0.850978	Sensitive	0.0448839	0.543057	Sensitive	0.08297	0.560105
SHPRH	Sensitive	0.560355	0.850978	Sensitive	0.08297	0.543057	Sensitive	0.0448839	0.560105
BIRC6	Sensitive	0.0166298	0.584284	Sensitive	0.346523	0.585622	Sensitive	0.36303	0.631545
CLASRP	Resistant	0.658436	0.953036	Resistant	0.0321346	0.543057	Resistant	0.099058	0.560105
KLHL13	Sensitive	0.564816	0.850978	Sensitive	0.0829666	0.543057	Sensitive	0.0448795	0.560105
C16orf95	Resistant	0.564816	0.850978	Resistant	0.0448795	0.543057	Resistant	0.0829666	0.560105
DNM2	Resistant	0.56482	0.850978	Resistant	0.08297	0.543057	Resistant	0.0448839	0.560105
IFNAR2	Sensitive	0.56482	0.850978	Sensitive	0.08297	0.543057	Sensitive	0.0448839	0.560105
DDX20	Sensitive	0.56482	0.850978	Sensitive	0.0448839	0.543057	Sensitive	0.08297	0.560105
SIRT3	Sensitive	0.56482	0.850978	Sensitive	0.0448839	0.543057	Sensitive	0.08297	0.560105
LYAR	Sensitive	0.56482	0.850978	Sensitive	0.08297	0.543057	Sensitive	0.0448839	0.560105
PRUNE2	Sensitive	0.567058	0.850978	Sensitive	0.08297	0.543057	Sensitive	0.0448835	0.560105
FBXW5	Sensitive	0.0137106	0.584284	Sensitive	0.157302	0.543057	Resistant	0.982091	1
MECOM	Sensitive	0.569302	0.850978	Sensitive	0.08297	0.543057	Sensitive	0.0448839	0.560105
IGFBP4	Sensitive	0.569302	0.850978	Sensitive	0.0448839	0.543057	Sensitive	0.08297	0.560105
ORC1	Sensitive	0.569302	0.850978	Sensitive	0.0448839	0.543057	Sensitive	0.08297	0.560105
IRS2	Sensitive	0.569302	0.850978	Sensitive	0.08297	0.543057	Sensitive	0.0448839	0.560105
STARD3	Sensitive	0.0448839	0.584284	Sensitive	0.569302	0.802606	Sensitive	0.08297	0.560105
PSIP1	Sensitive	0.569302	0.850978	Sensitive	0.0448839	0.543057	Sensitive	0.08297	0.560105
ZNF496	Resistant	0.08297	0.584284	Resistant	0.569302	0.802606	Resistant	0.0448839	0.560105
SCAP	Sensitive	0.704649	1	Sensitive	0.0914415	0.543057	Sensitive	0.0331314	0.560105
MKL1	Sensitive	0.262829	0.584284	Sensitive	0.253656	0.543057	Sensitive	0.0327962	0.560105
NOTCH1	Sensitive	0.786404	1	Sensitive	0.0893082	0.543057	Sensitive	0.0311517	0.560105
LPIN3	Sensitive	0.157893	0.584284	Sensitive	0.0448839	0.543057	Sensitive	0.312474	0.560105
JUND	Resistant	0.0246817	0.584284	Resistant	0.157893	0.543057	Resistant	0.569302	0.82143
EPN1	Sensitive	0.157893	0.584284	Sensitive	0.315231	0.543057	Sensitive	0.0448839	0.560105
SLTM	Sensitive	0.157893	0.584284	Sensitive	0.0448839	0.543057	Sensitive	0.315231	0.560105
DDX24	Sensitive	0.157893	0.584284	Sensitive	0.318005	0.543057	Sensitive	0.0448839	0.560105
MAU2	Resistant	0.319397	0.584284	Resistant	0.157893	0.543057	Resistant	0.0448835	0.560105
DNAJB9	Sensitive	0.320084	0.584284	Sensitive	0.0448839	0.543057	Sensitive	0.157893	0.560105
ZMYND11	Resistant	0.0448839	0.584284	Resistant	0.320084	0.543057	Resistant	0.157893	0.560105
USP25	Resistant	0.320084	0.584284	Resistant	0.0448839	0.543057	Resistant	0.157893	0.560105
HR	Resistant	0.320084	0.584284	Resistant	0.157893	0.543057	Resistant	0.0448839	0.560105
DSEL	Sensitive	0.320084	0.584284	Sensitive	0.0448839	0.543057	Sensitive	0.157893	0.560105
CLIP2	Sensitive	0.320794	0.584284	Sensitive	0.0448839	0.543057	Sensitive	0.157893	0.560105
ZFP36	Sensitive	0.157893	0.584284	Sensitive	0.320794	0.543057	Sensitive	0.0448839	0.560105
IER5L	Resistant	0.0448839	0.584284	Resistant	0.320794	0.543057	Resistant	0.157893	0.560105
IFT81	Resistant	0.08297	0.584284	Resistant	0.0448839	0.543057	Resistant	0.643626	0.91874
PDCD6	Sensitive	0.654721	0.953036	Sensitive	0.0448839	0.543057	Sensitive	0.08297	0.560105
AHI1	Resistant	0.0448839	0.584284	Resistant	0.654721	0.898253	Resistant	0.08297	0.560105
SETD6	Sensitive	0.312474	0.584284	Sensitive	0.0448839	0.543057	Sensitive	0.174761	0.560105
SPRTN	Sensitive	0.0448839	0.584284	Sensitive	0.658436	0.898253	Sensitive	0.08297	0.560105
BSDC1	Sensitive	0.0448839	0.584284	Sensitive	0.08297	0.543057	Sensitive	0.66216	0.919474
PARP9	Resistant	0.665892	0.954516	Resistant	0.08297	0.543057	Resistant	0.0448839	0.560105
APEX2	Resistant	0.0448839	0.584284	Resistant	0.08297	0.543057	Resistant	0.665892	0.919474
EXOC4	Resistant	0.993132	1	Resistant	0.0246817	0.543057	Resistant	0.102966	0.560105
CREBBP	Sensitive	0.55077	0.850978	Sensitive	0.23213	0.543057	Sensitive	0.0197468	0.560105
DHX37	Sensitive	0.992501	1	Sensitive	0.0569132	0.543057	Sensitive	0.0448839	0.560105
CCM2	Sensitive	0.312474	0.584284	Sensitive	0.0448839	0.543057	Sensitive	0.181386	0.560105
USP42	Sensitive	0.254563	0.584284	Sensitive	0.316385	0.543057	Sensitive	0.0331314	0.560105
NSD1	Sensitive	0.0347367	0.584284	Sensitive	0.152565	0.543057	Sensitive	0.522919	0.82143
MAP3K9	Resistant	0.651014	0.953036	Resistant	0.0448835	0.543057	Resistant	0.0980992	0.560105
ARHGAP23	Sensitive	0.654721	0.953036	Resistant	0.100024	0.543057	Resistant	0.0448839	0.560105
RAF1	Sensitive	0.665892	0.954516	Sensitive	0.0246817	0.543057	Sensitive	0.179712	0.560105
ATXN2	Resistant	0.101978	0.584284	Resistant	0.651014	0.898253	Resistant	0.0448839	0.560105
ZZZ3	Resistant	0.259133	0.584284	Resistant	0.0448839	0.543057	Resistant	0.256384	0.560105
PCM1	Resistant	0.472557	0.829819	Resistant	0.0183561	0.543057	Resistant	0.350637	0.611048
PIEZO1	Sensitive	0.701721	0.999786	Sensitive	0.0212862	0.543057	Sensitive	0.203962	0.560105
STAM2	Sensitive	0.315231	0.584284	Sensitive	0.0137106	0.543057	Sensitive	0.707887	0.968355
SORL1	Sensitive	0.704649	1	Sensitive	0.0980997	0.543057	Sensitive	0.0448839	0.560105
PHRF1	Sensitive	0.255473	0.584284	Sensitive	0.0187408	0.543057	Resistant	0.665892	0.919474
HCFC1	Sensitive	0.0302077	0.584284	Sensitive	0.230817	0.543057	Sensitive	0.462552	0.782434
KIAA0430	Resistant	1	1	Resistant	0.102966	0.543057	Resistant	0.032464	0.560105
AKR1B15	Resistant	0.414889	0.73761	Resistant	0.181386	0.543057	Resistant	0.0448839	0.560105
DYNC1H1	Sensitive	0.985395	1	Sensitive	0.130453	0.543057	Sensitive	0.0269354	0.560105
DAXX	Sensitive	0.417583	0.739059	Sensitive	0.0334694	0.543057	Sensitive	0.262829	0.560105
DYNC2H1	Resistant	0.654719	0.953036	Resistant	0.41086	0.685783	Resistant	0.0137101	0.560105
COG6	Sensitive	1	1	Sensitive	0.0448835	0.543057	Sensitive	0.0829692	0.560105
AP1G1	Resistant	1	1	Resistant	0.0448839	0.543057	Resistant	0.08297	0.560105
LENG8	Sensitive	0.0448839	0.584284	Resistant	1	1	Resistant	0.08297	0.560105
ARID5B	Sensitive	0.0246815	0.584284	Sensitive	0.994376	1	Sensitive	0.154328	0.560105
ADCY6	Resistant	0.0246817	0.584284	Resistant	0.157893	0.543057	Resistant	1	1
MAGI1	Sensitive	0.301724	0.584284	Sensitive	0.0314845	0.543057	Sensitive	0.412205	0.7066
PRICKLE3	Resistant	0.157893	0.584284	Resistant	0.0448821	0.543057	Resistant	0.560354	0.82143
SAMD4B	Sensitive	0.560355	0.850978	Sensitive	0.0448839	0.543057	Sensitive	0.157893	0.560105
XAB2	Resistant	0.0448839	0.584284	Resistant	0.560355	0.802606	Resistant	0.157893	0.560105
KLHL22	Sensitive	0.56482	0.850978	Sensitive	0.157893	0.543057	Sensitive	0.0448839	0.560105
SSX2IP	Sensitive	0.157893	0.584284	Sensitive	0.56482	0.802606	Sensitive	0.0448839	0.560105
TRAPPC8	Sensitive	0.567058	0.850978	Sensitive	0.0448839	0.543057	Sensitive	0.157893	0.560105
SP4	Sensitive	0.0448839	0.584284	Sensitive	0.157893	0.543057	Sensitive	0.569302	0.82143
CCNK	Sensitive	0.157893	0.584284	Sensitive	0.0448839	0.543057	Resistant	0.569302	0.82143
ZDHHC20	Resistant	0.569302	0.850978	Resistant	0.0448839	0.543057	Resistant	0.157893	0.560105
TNC	Resistant	0.032464	0.584284	Resistant	0.707887	0.948558	Resistant	0.1764	0.560105
KIF18B	Sensitive	0.720892	1	Sensitive	0.0321346	0.543057	Sensitive	0.1764	0.560105
SENP5	Resistant	0.260974	0.584284	Resistant	0.651014	0.898253	Resistant	0.0246817	0.560105
C6orf141	Resistant	0.178036	0.584284	Resistant	0.990626	1	Resistant	0.0246793	0.560105
USP28	Sensitive	0.560355	0.850978	Sensitive	0.0246817	0.543057	Sensitive	0.315231	0.560105
AIFM2	Resistant	0.0448839	0.584284	Resistant	0.312474	0.543057	Resistant	0.312474	0.560105
GPATCH2	Resistant	0.312474	0.584284	Resistant	0.315231	0.543057	Resistant	0.0448839	0.560105
ZNF354A	Sensitive	1	1	Sensitive	0.0246817	0.543057	Sensitive	0.179712	0.560105
C2orf44	Resistant	0.560355	0.850978	Resistant	0.0246817	0.543057	Resistant	0.320794	0.560105
WDR6	Resistant	0.0448839	0.584284	Resistant	0.100024	0.543057	Resistant	0.988752	1
NAV3	Sensitive	0.315231	0.584284	Sensitive	0.315231	0.543057	Sensitive	0.0448835	0.560105
RFC1	Sensitive	0.56482	0.850978	Sensitive	0.0246817	0.543057	Sensitive	0.320084	0.560105
DNMT3B	Sensitive	0.318005	0.584284	Sensitive	0.0246817	0.543057	Sensitive	0.569302	0.82143
STAG1	Resistant	1	1	Resistant	0.181386	0.543057	Resistant	0.0246817	0.560105
ZBTB33	Sensitive	0.320084	0.584284	Sensitive	0.0448821	0.543057	Sensitive	0.31247	0.560105
MESDC1	Resistant	1	1	Resistant	0.100024	0.543057	Resistant	0.0448839	0.560105
SPATA5L1	Sensitive	0.56482	0.850978	Sensitive	0.178051	0.543057	Sensitive	0.0448839	0.560105
MRPS6	Sensitive	0.320084	0.584284	Sensitive	0.0448839	0.543057	Sensitive	0.315231	0.560105
IRF2BPL	Sensitive	0.0448839	0.584284	Sensitive	0.248261	0.543057	Sensitive	0.406868	0.702262
HSPA12A	Sensitive	0.569302	0.850978	Sensitive	0.0448839	0.543057	Sensitive	0.178051	0.560105
RHPN1	Resistant	0.320084	0.584284	Resistant	0.318005	0.543057	Resistant	0.0448839	0.560105
SSBP4	Sensitive	0.567058	0.850978	Sensitive	0.0448835	0.543057	Sensitive	0.17971	0.560105
IPO5	Sensitive	0.320084	0.584284	Resistant	0.320084	0.543057	Resistant	0.0448839	0.560105
RNF20	Sensitive	0.320794	0.584284	Sensitive	0.0448839	0.543057	Sensitive	0.320794	0.560105
VCL	Resistant	0.0448839	0.584284	Resistant	0.157893	0.543057	Resistant	0.658436	0.91874
ACTR6	Sensitive	0.0448839	0.584284	Sensitive	0.157893	0.543057	Resistant	0.665892	0.919474
ERCC6L	Resistant	0.307159	0.584284	Resistant	0.475067	0.776769	Resistant	0.0329616	0.560105
MYO1C	Sensitive	0.46754	0.822189	Sensitive	0.417583	0.688697	Sensitive	0.0246817	0.560105
ZNF516	Resistant	1	1	Resistant	0.0314843	0.543057	Resistant	0.154328	0.560105
ERBB2	Sensitive	0.997079	1	Sensitive	0.152565	0.543057	Sensitive	0.032464	0.560105
ERBB3	Sensitive	0.647316	0.953036	Sensitive	0.0448839	0.543057	Sensitive	0.174761	0.560105
TRIM11	Resistant	0.643626	0.953036	Resistant	0.0246817	0.543057	Resistant	0.320794	0.560105
RAB11FIP1	Sensitive	0.651014	0.953036	Sensitive	0.0448839	0.543057	Sensitive	0.174761	0.560105
FOCAD	Resistant	0.318005	0.584284	Resistant	0.0246815	0.543057	Resistant	0.651014	0.91874
WDR13	Sensitive	0.318005	0.584284	Sensitive	0.654721	0.898253	Sensitive	0.0246817	0.560105
GIGYF2	Sensitive	0.652866	0.953036	Sensitive	0.179712	0.543057	Sensitive	0.0448839	0.560105
BAI2	Sensitive	0.0246817	0.584284	Sensitive	0.320794	0.543057	Sensitive	0.665892	0.919474
AKAP13	Sensitive	0.994158	1	Resistant	0.0334694	0.543057	Resistant	0.158504	0.560105
UBA3	Resistant	0.66216	0.953538	Resistant	0.0448839	0.543057	Resistant	0.179712	0.560105
SPTY2D1	Resistant	0.181386	0.584284	Resistant	0.0448839	0.543057	Resistant	0.658436	0.91874
PLCB1	Resistant	0.0137105	0.584284	Resistant	0.409531	0.684957	Resistant	0.994376	1
MED13L	Sensitive	0.357901	0.650579	Sensitive	0.320121	0.543057	Sensitive	0.0495349	0.560105
TMEM185B	Resistant	0.656577	0.953036	Resistant	0.654719	0.898253	Resistant	0.0137105	0.560105
CHTF18	Sensitive	0.406867	0.732815	Sensitive	0.0246817	0.543057	Resistant	0.651014	0.91874
BRWD3	Resistant	0.476334	0.835653	Resistant	0.0335464	0.543057	Resistant	0.414876	0.708334
MCF2L	Sensitive	0.0448839	0.584284	Sensitive	0.157893	0.543057	Resistant	0.993132	1
APLP1	Sensitive	0.157893	0.584284	Resistant	0.99771	1	Resistant	0.0448839	0.560105
FGFR3	Sensitive	1	1	Sensitive	0.0448839	0.543057	Sensitive	0.157893	0.560105
ENTPD4	Resistant	1	1	Resistant	0.0448839	0.543057	Resistant	0.157893	0.560105
CCP110	Resistant	1	1	Resistant	0.157893	0.543057	Resistant	0.0448839	0.560105
PRSS23	Resistant	1	1	Resistant	0.0448839	0.543057	Resistant	0.157893	0.560105
ABCB9	Sensitive	0.0448839	0.584284	Sensitive	1	1	Sensitive	0.157893	0.560105
NOB1	Sensitive	1	1	Sensitive	0.157893	0.543057	Sensitive	0.0448839	0.560105
GOLGA8A	Sensitive	0.506383	0.850978	Sensitive	0.0310172	0.543057	Sensitive	0.46754	0.789775
DVL1	Resistant	0.0448839	0.584284	Resistant	0.262829	0.543057	Resistant	0.643626	0.91874
AASDH	Sensitive	0.0448835	0.584284	Sensitive	0.412202	0.685783	Sensitive	0.412202	0.7066
ZNF700	Sensitive	0.0448839	0.584284	Sensitive	0.255473	0.543057	Sensitive	0.665892	0.919474
SLC39A10	Resistant	0.993132	1	Resistant	0.0246817	0.543057	Resistant	0.312474	0.560105
CRYBG3	Sensitive	0.526498	0.850978	Sensitive	0.475076	0.776769	Sensitive	0.031017	0.560105
LAMC2	Sensitive	0.318005	0.584284	Resistant	0.992501	1	Resistant	0.0246817	0.560105
ABCC3	Sensitive	0.251849	0.584284	Sensitive	0.0314845	0.543057	Sensitive	0.988752	1
LPCAT4	Resistant	0.0246817	0.584284	Resistant	0.993132	1	Resistant	0.320084	0.560105
MANBA	Sensitive	0.318005	0.584284	Sensitive	0.0246817	0.543057	Sensitive	1	1
GFER	Sensitive	0.0448835	0.584284	Sensitive	0.560355	0.802606	Sensitive	0.312473	0.560105
CENPB	Sensitive	0.560355	0.850978	Sensitive	0.0448839	0.543057	Sensitive	0.312474	0.560105
KIAA1549L	Resistant	0.0448839	0.584284	Resistant	0.560355	0.802606	Resistant	0.312474	0.560105
USP1	Sensitive	0.414889	0.73761	Sensitive	0.423003	0.694411	Sensitive	0.0448839	0.560105
CCT7	Resistant	1	1	Resistant	0.1764	0.543057	Resistant	0.0448839	0.560105
EIF4ENIF1	Resistant	0.0448835	0.584284	Resistant	0.315231	0.543057	Resistant	0.560355	0.82143
UPF2	Sensitive	0.0448839	0.584284	Sensitive	0.420288	0.691397	Sensitive	0.420288	0.71313
RPS6KA4	Resistant	1	1	Resistant	0.0191324	0.543057	Resistant	0.414889	0.708334
ISYNA1	Resistant	1	1	Resistant	0.0448839	0.543057	Resistant	0.178051	0.560105
KIAA1244	Sensitive	0.179712	0.584284	Sensitive	0.0448839	0.543057	Resistant	0.993132	1
COL6A2	Resistant	0.560355	0.850978	Resistant	0.320084	0.543057	Resistant	0.0448839	0.560105
TARBP1	Sensitive	0.320084	0.584284	Sensitive	0.0448839	0.543057	Sensitive	0.560355	0.82143
BTBD11	Resistant	0.0448839	0.584284	Resistant	0.560355	0.802606	Resistant	0.320084	0.560105
PIM2	Sensitive	0.0448839	0.584284	Resistant	0.569302	0.802606	Resistant	0.315231	0.560105
TNFRSF1B	Resistant	0.318005	0.584284	Resistant	0.56482	0.802606	Resistant	0.0448839	0.560105
CXorf56	Sensitive	0.0448839	0.584284	Sensitive	0.318005	0.543057	Sensitive	0.56482	0.82143
ZNF598	Sensitive	0.56482	0.850978	Sensitive	0.318005	0.543057	Sensitive	0.0448839	0.560105
NEIL2	Resistant	0.0448839	0.584284	Resistant	0.56482	0.802606	Resistant	0.318005	0.560105
DCAF12	Resistant	0.560355	0.850978	Resistant	0.320794	0.543057	Resistant	0.0448839	0.560105
ANKFY1	Sensitive	0.56482	0.850978	Sensitive	0.320084	0.543057	Sensitive	0.0448839	0.560105
SPIRE2	Sensitive	0.320084	0.584284	Sensitive	0.0448839	0.543057	Sensitive	0.56482	0.82143
FZD4	Resistant	0.569302	0.850978	Resistant	0.0448839	0.543057	Resistant	0.318005	0.560105
SYNM	Sensitive	0.0448839	0.584284	Sensitive	0.56482	0.802606	Sensitive	0.320794	0.560105
PAXBP1	Resistant	0.0448839	0.584284	Resistant	0.56482	0.802606	Resistant	0.320794	0.560105
ACVR1	Resistant	0.0448839	0.584284	Resistant	0.320084	0.543057	Resistant	0.569302	0.82143
EPB41	Resistant	0.0448839	0.584284	Resistant	0.320084	0.543057	Resistant	0.569302	0.82143
GSTZ1	Sensitive	0.569302	0.850978	Sensitive	0.0448839	0.543057	Sensitive	0.320084	0.560105
POLL	Resistant	0.320084	0.584284	Resistant	0.569302	0.802606	Resistant	0.0448839	0.560105
SMTN	Sensitive	0.320794	0.584284	Sensitive	0.569302	0.802606	Resistant	0.0448839	0.560105
MYH9	Resistant	0.348836	0.634624	Resistant	0.0331314	0.543057	Resistant	0.717633	0.978768
SCAF8	Resistant	0.0448839	0.584284	Resistant	0.259133	0.543057	Resistant	0.717633	0.978768
SMAD6	Sensitive	0.560355	0.850978	Sensitive	0.0246817	0.543057	Sensitive	0.647316	0.91874
CHPF2	Sensitive	0.685335	0.981648	Sensitive	0.032796	0.543057	Sensitive	0.406867	0.702262
GLIPR2	Resistant	0.0448835	0.584284	Resistant	0.315231	0.543057	Resistant	0.651014	0.91874
NOC2L	Sensitive	0.56482	0.850978	Sensitive	0.66216	0.899101	Sensitive	0.0246817	0.560105
CACNA1H	Sensitive	0.0448839	0.584284	Resistant	0.658436	0.898253	Resistant	0.312474	0.560105
PGM2	Resistant	0.0448839	0.584284	Resistant	0.312474	0.543057	Resistant	0.66216	0.919474
SMYD3	Resistant	0.0448835	0.584284	Resistant	0.649158	0.898253	Resistant	0.320084	0.560105
MAML2	Sensitive	0.66216	0.953538	Sensitive	0.0448839	0.543057	Sensitive	0.318005	0.560105
EZH1	Resistant	0.0448839	0.584284	Resistant	0.320794	0.543057	Resistant	0.665892	0.919474
USP9X	Sensitive	0.412205	0.735689	Sensitive	0.0318082	0.543057	Resistant	0.754938	1
CEP97	Resistant	0.996251	1	Resistant	0.0246817	0.543057	Resistant	0.417583	0.709963
FHOD1	Sensitive	0.560355	0.850978	Resistant	0.0448839	0.543057	Resistant	0.412205	0.7066
FN1	Sensitive	0.0448839	0.584284	Sensitive	0.414889	0.687548	Sensitive	0.56482	0.82143
MAP3K11	Resistant	0.0448839	0.584284	Resistant	0.988752	1	Resistant	0.25005	0.560105
NXN	Sensitive	0.0448839	0.584284	Resistant	0.652866	0.898253	Resistant	0.417583	0.709963
MAP4	Sensitive	1	1	Resistant	0.560355	0.802606	Resistant	0.0246817	0.560105
MAN2B1	Resistant	1	1	Resistant	0.312474	0.543057	Resistant	0.0448839	0.560105
KIAA0232	Sensitive	1	1	Sensitive	0.312474	0.543057	Sensitive	0.0448839	0.560105
TBRG4	Sensitive	0.993132	1	Sensitive	0.0448839	0.543057	Sensitive	0.315231	0.560105
ZNF668	Resistant	0.560355	0.850978	Resistant	0.560355	0.802606	Resistant	0.0448839	0.560105
ELMO2	Sensitive	0.560355	0.850978	Sensitive	0.0448839	0.543057	Sensitive	0.560355	0.82143
FANCC	Sensitive	0.99771	1	Resistant	0.315231	0.543057	Resistant	0.0448839	0.560105
LLGL2	Resistant	0.0448839	0.584284	Resistant	0.315231	0.543057	Resistant	1	1
ALKBH1	Resistant	1	1	Resistant	0.315231	0.543057	Resistant	0.0448839	0.560105
RAB11FIP5	Resistant	0.0448839	0.584284	Resistant	0.99771	1	Resistant	0.318005	0.560105
HP1BP3	Resistant	0.99771	1	Resistant	0.318005	0.543057	Resistant	0.0448839	0.560105
NMRAL1	Sensitive	1	1	Sensitive	0.0448839	0.543057	Sensitive	0.318005	0.560105
EXOC6	Sensitive	0.56482	0.850978	Sensitive	0.0448839	0.543057	Sensitive	0.56482	0.82143
IQCC	Sensitive	0.0448839	0.584284	Sensitive	0.56482	0.802606	Sensitive	0.56482	0.82143
CDC23	Resistant	0.320084	0.584284	Resistant	0.0448839	0.543057	Resistant	1	1
SLC25A17	Resistant	0.0448839	0.584284	Resistant	0.320084	0.543057	Resistant	1	1
PPAP2C	Sensitive	0.0448839	0.584284	Sensitive	0.320794	0.543057	Resistant	1	1
VPS53	Sensitive	1	1	Sensitive	0.0448839	0.543057	Sensitive	0.320794	0.560105
ASPSCR1	Sensitive	1	1	Resistant	0.320794	0.543057	Resistant	0.0448839	0.560105
DDX60L	Resistant	0.569302	0.850978	Resistant	0.0448835	0.543057	Resistant	0.56482	0.82143
RIPK4	Resistant	0.0448839	0.584284	Resistant	0.56482	0.802606	Resistant	0.569302	0.82143
WRN	Sensitive	0.569302	0.850978	Sensitive	0.569302	0.802606	Sensitive	0.0448839	0.560105
COG1	Sensitive	0.569302	0.850978	Sensitive	0.0448839	0.543057	Sensitive	0.569302	0.82143
COX3	Resistant	0.560355	0.850978	Resistant	0.0448839	0.543057	Resistant	0.647316	0.91874
ARMC5	Sensitive	0.56482	0.850978	Sensitive	0.647316	0.898253	Sensitive	0.0448839	0.560105
SFSWAP	Sensitive	0.0321346	0.584284	Sensitive	0.717633	0.957423	Sensitive	0.714379	0.975176
TLN2	Resistant	0.032464	0.584284	Resistant	0.704649	0.945485	Resistant	0.724155	0.986931
XPC	Resistant	0.0448839	0.584284	Resistant	0.660297	0.899101	Resistant	0.560355	0.82143
FBXL3	Resistant	0.56482	0.850978	Resistant	0.0448839	0.543057	Resistant	0.658436	0.91874
CCAR1	Sensitive	0.0448839	0.584284	Resistant	0.654721	0.898253	Resistant	0.569302	0.82143
NAIF1	Sensitive	0.658436	0.953036	Sensitive	0.0448839	0.543057	Sensitive	0.569302	0.82143
HEG1	Sensitive	0.665892	0.954516	Resistant	0.0448839	0.543057	Resistant	0.569302	0.82143
MON2	Sensitive	0.0334694	0.584284	Resistant	0.691751	0.933868	Resistant	0.752011	1
PIK3R4	Sensitive	0.560355	0.850978	Resistant	0.99771	1	Resistant	0.0318082	0.560105
GPBP1	Sensitive	0.0448839	0.584284	Sensitive	0.71113	0.951284	Sensitive	0.569302	0.82143
PCSK1N	Sensitive	0.99771	1	Resistant	0.418934	0.690303	Resistant	0.0448839	0.560105
LIMCH1	Resistant	0.665892	0.954516	Resistant	0.647316	0.898253	Resistant	0.0448839	0.560105
FAM179B	Resistant	0.0448839	0.584284	Resistant	0.66216	0.899101	Resistant	0.66216	0.919474
PPP1R26	Resistant	0.748304	1	Resistant	0.0336999	0.543057	Resistant	0.80618	1
ZNF711	Sensitive	0.649158	0.953036	Resistant	0.99625	1	Resistant	0.0327926	0.560105
UHRF1BP1L	Sensitive	0.749088	1	Sensitive	0.0448839	0.543057	Sensitive	0.714379	0.975176
KIAA1468	Resistant	0.0246815	0.584284	Resistant	0.992501	1	Resistant	0.992501	1
PROS1	Resistant	0.0448839	0.584284	Resistant	1	1	Resistant	0.560355	0.82143
FBXO46	Resistant	1	1	Resistant	0.560355	0.802606	Resistant	0.0448839	0.560105
PPP2R1A	Resistant	0.0448839	0.584284	Resistant	0.99771	1	Resistant	0.56482	0.82143
FCHSD2	Sensitive	0.56482	0.850978	Sensitive	0.0448839	0.543057	Sensitive	1	1
MAT2B	Sensitive	0.56482	0.850978	Sensitive	0.0448839	0.543057	Sensitive	1	1
ULBP2	Resistant	0.0448839	0.584284	Resistant	0.56482	0.802606	Resistant	1	1
C16orf59	Sensitive	0.569302	0.850978	Resistant	0.993132	1	Resistant	0.0448839	0.560105
BAG3	Sensitive	1	1	Sensitive	0.0448839	0.543057	Sensitive	0.569302	0.82143
HEBP1	Sensitive	0.0448839	0.584284	Sensitive	1	1	Sensitive	0.569302	0.82143
CDH24	Sensitive	0.0448839	0.584284	Resistant	1	1	Resistant	0.569302	0.82143
LRRC8E	Sensitive	1	1	Sensitive	0.569302	0.802606	Sensitive	0.0448839	0.560105
HIRA	Sensitive	0.993132	1	Sensitive	0.654721	0.898253	Sensitive	0.0448839	0.560105
ACLY	Sensitive	1	1	Sensitive	0.0448835	0.543057	Sensitive	0.651014	0.91874
SKIV2L	Resistant	0.982091	1	Resistant	0.0448839	0.543057	Resistant	0.665892	0.919474
HDAC7	Sensitive	0.654721	0.953036	Resistant	1	1	Resistant	0.0448839	0.560105
RTTN	Resistant	0.988752	1	Resistant	0.691751	0.933868	Resistant	0.0448835	0.560105
FGFR2	Sensitive	0.993132	1	Sensitive	0.701416	0.942641	Resistant	0.0448839	0.560105
ZNF205	Resistant	0.0448839	0.584284	Resistant	1	1	Resistant	0.993132	1
TRIM26	Resistant	0.0448839	0.584284	Resistant	1	1	Resistant	0.99771	1
OSBPL6	Sensitive	1	1	Sensitive	0.99771	1	Sensitive	0.0448839	0.560105
ZNF12	Sensitive	1	1	Resistant	1	1	Resistant	0.0448839	0.560105

## Sheet: Table S3 Mutations-Mesenchymal
Genes	24hr subgroup with enriched mutations	24hr P-value	24hr adjusted P-value	48hr subgroup with enriched mutations	48hr P-value	48hr adjusted P-value	72hr subgroup with enriched mutations	72hr P-value	72hr adjusted P-value
DMXL2	Resistant	0.00728971	0.741237	Resistant	0.00728971	0.711067	Resistant	0.00728971	0.739085
BRAF	Resistant	0.0171161	0.741237	Resistant	0.00328191	0.711067	Resistant	0.012962	0.739085
CSNK1A1	Resistant	0.0241521	0.741237	Resistant	0.0132422	0.711067	Resistant	0.0241521	0.739085
RAD54L2	Resistant	0.0132422	0.741237	Resistant	0.0241521	0.711067	Resistant	0.0241521	0.739085
KRAS	Resistant	0.00723233	0.741237	Resistant	0.0695691	0.711067	Resistant	0.0198612	0.739085
OBSCN	Sensitive	0.00728971	0.741237	Sensitive	0.0132422	0.711067	Sensitive	0.140598	0.739085
HDAC9	Resistant	0.0241521	0.741237	Resistant	0.0443893	0.711067	Resistant	0.0132422	0.739085
CLOCK	Sensitive	0.013238	0.741237	Sensitive	0.024149	0.711067	Sensitive	0.0544159	0.739085
ANKRD32	Resistant	0.0443893	0.741237	Resistant	0.0443893	0.711067	Resistant	0.0443893	0.739085
PTPN13	Sensitive	0.082732	0.741237	Sensitive	0.0241521	0.711067	Sensitive	0.0443893	0.739085
ROCK2	Resistant	0.0241521	0.741237	Resistant	0.082732	0.711067	Resistant	0.0443893	0.739085
FAN1	Resistant	0.082732	0.741237	Resistant	0.0241521	0.711067	Resistant	0.0443893	0.739085
TCOF1	Sensitive	0.0443893	0.741237	Sensitive	0.082732	0.711067	Sensitive	0.0241521	0.739085
LMF2	Resistant	0.0443893	0.741237	Resistant	0.082732	0.711067	Resistant	0.0241521	0.739085
NOTCH1	Sensitive	0.396177	0.906629	Sensitive	0.0313331	0.711067	Sensitive	0.00728948	0.739085
RPTOR	Resistant	0.179713	0.741237	Resistant	0.0132422	0.711067	Resistant	0.0524689	0.739085
TENM2	Sensitive	0.0443893	0.741237	Sensitive	0.0443893	0.711067	Sensitive	0.082732	0.739085
SART1	Resistant	0.0443893	0.741237	Resistant	0.082732	0.711067	Resistant	0.0443893	0.739085
METTL3	Sensitive	0.082732	0.741237	Sensitive	0.0443893	0.711067	Sensitive	0.0443893	0.739085
DOCK6	Sensitive	0.0443893	0.741237	Sensitive	0.082732	0.711067	Sensitive	0.0443893	0.739085
HSPG2	Sensitive	0.0508984	0.741237	Sensitive	0.11067	0.711067	Sensitive	0.0290718	0.739085
SAFB2	Sensitive	0.173743	0.741237	Sensitive	0.0443893	0.711067	Sensitive	0.0241521	0.739085
ATF7IP	Resistant	0.179703	0.741237	Resistant	0.0443893	0.711067	Resistant	0.0241513	0.739085
CDKN2A	Resistant	0.00161074	0.741237	Resistant	0.189692	0.711067	Resistant	0.779255	1
GSE1	Sensitive	0.0574739	0.741237	Sensitive	0.1595	0.711067	Sensitive	0.029623	0.739085
COL5A3	Resistant	0.0443878	0.741237	Resistant	0.0827292	0.711067	Resistant	0.0827292	0.739085
ABCA2	Resistant	0.0443893	0.741237	Resistant	0.0827292	0.711067	Resistant	0.082732	0.739085
ACTL6A	Resistant	0.082732	0.741237	Resistant	0.082732	0.711067	Resistant	0.0443893	0.739085
TTLL12	Sensitive	0.0443893	0.741237	Sensitive	0.082732	0.711067	Sensitive	0.082732	0.739085
PCF11	Resistant	0.0443893	0.741237	Resistant	0.082732	0.711067	Resistant	0.082732	0.739085
STX18	Sensitive	0.082732	0.741237	Sensitive	0.082732	0.711067	Sensitive	0.0443893	0.739085
SNIP1	Sensitive	0.082732	0.741237	Sensitive	0.082732	0.711067	Sensitive	0.0443893	0.739085
SUMF1	Sensitive	0.082732	0.741237	Sensitive	0.082732	0.711067	Sensitive	0.0443893	0.739085
MEGF6	Sensitive	0.158373	0.741237	Sensitive	0.0443893	0.711067	Sensitive	0.0443893	0.739085
VBP1	Sensitive	0.158373	0.741237	Sensitive	0.0443893	0.711067	Sensitive	0.0443893	0.739085
USP15	Resistant	0.0443893	0.741237	Resistant	0.0443893	0.711067	Resistant	0.158373	0.739085
VPS8	Sensitive	0.158373	0.741237	Sensitive	0.0443893	0.711067	Sensitive	0.0443893	0.739085
FBXW7	Resistant	0.0443893	0.741237	Resistant	0.0443893	0.711067	Resistant	0.158373	0.739085
VPS18	Sensitive	0.158373	0.741237	Sensitive	0.0443893	0.711067	Sensitive	0.0443893	0.739085
HPS6	Sensitive	0.158373	0.741237	Sensitive	0.0443893	0.711067	Sensitive	0.0443893	0.739085
ZNF292	Sensitive	1	1	Sensitive	0.0241521	0.711067	Sensitive	0.0132418	0.739085
HMCN1	Sensitive	0.0241521	0.741237	Sensitive	0.323635	0.711067	Sensitive	0.0443893	0.739085
AQR	Sensitive	0.170815	0.741237	Sensitive	0.0963467	0.711067	Sensitive	0.0241521	0.739085
TPP2	Resistant	0.158373	0.741237	Resistant	0.0443893	0.711067	Resistant	0.082732	0.739085
INADL	Resistant	0.158373	0.741237	Resistant	0.082732	0.711067	Resistant	0.0443893	0.739085
CLMN	Resistant	0.0443893	0.741237	Resistant	0.158373	0.711067	Resistant	0.082732	0.739085
NFATC2IP	Resistant	0.0443893	0.741237	Resistant	0.082732	0.711067	Resistant	0.158373	0.739085
MYO18A	Resistant	0.158373	0.741237	Resistant	0.082732	0.711067	Resistant	0.0443893	0.739085
SBNO2	Sensitive	0.30859	0.741237	Sensitive	0.0443893	0.711067	Sensitive	0.0443893	0.739085
RETSAT	Sensitive	0.573847	1	Sensitive	0.0241521	0.711067	Sensitive	0.0443893	0.739085
YLPM1	Resistant	0.0443878	0.741237	Resistant	0.321091	0.711067	Resistant	0.0443835	0.739085
PUM1	Resistant	0.0443893	0.741237	Resistant	0.173743	0.711067	Resistant	0.082732	0.739085
URB1	Sensitive	0.113552	0.741237	Sensitive	0.0312792	0.711067	Sensitive	0.184095	0.739085
RAI1	Resistant	0.149821	0.741237	Resistant	0.182754	0.711067	Resistant	0.0241521	0.739085
PITPNM2	Sensitive	0.654721	1	Sensitive	0.0241521	0.711067	Sensitive	0.0443893	0.739085
AKAP13	Sensitive	0.993196	1	Resistant	0.0241521	0.711067	Resistant	0.0443893	0.739085
BRCA2	Sensitive	0.0443878	0.741237	Sensitive	0.0443878	0.711067	Sensitive	0.557652	1
REPIN1	Sensitive	0.158373	0.741237	Sensitive	0.0443893	0.711067	Sensitive	0.158373	0.739085
ARHGAP27	Sensitive	0.158373	0.741237	Sensitive	0.158373	0.711067	Sensitive	0.0443893	0.739085
NF2	Resistant	0.0132422	0.741237	Resistant	0.176707	0.711067	Resistant	0.480664	1
FANCI	Sensitive	0.573847	1	Sensitive	0.0443893	0.711067	Sensitive	0.0443893	0.739085
AGAP6	Resistant	0.082732	0.741237	Resistant	0.30859	0.711067	Resistant	0.0443893	0.739085
ARHGAP23	Sensitive	0.313553	0.741237	Resistant	0.0443893	0.711067	Resistant	0.082732	0.739085
ZNF627	Resistant	0.082732	0.741237	Resistant	0.0443893	0.711067	Resistant	0.318568	0.739085
MNT	Sensitive	0.322325	0.741237	Sensitive	0.082732	0.711067	Sensitive	0.0443878	0.739085
RABL6	Sensitive	0.322325	0.741237	Sensitive	0.0443893	0.711067	Sensitive	0.082732	0.739085
C15orf39	Sensitive	0.322325	0.741237	Sensitive	0.082732	0.711067	Sensitive	0.0443893	0.739085
COL7A1	Resistant	0.0443893	0.741237	Resistant	0.323635	0.711067	Resistant	0.082732	0.739085
CLASP1	Sensitive	0.323635	0.741237	Sensitive	0.0443893	0.711067	Sensitive	0.082732	0.739085
RAB3IP	Resistant	0.0443893	0.741237	Resistant	0.323635	0.711067	Resistant	0.082732	0.739085
LRIG3	Resistant	0.0443893	0.741237	Resistant	0.082732	0.711067	Resistant	0.323635	0.739085
EML4	Sensitive	0.173743	0.741237	Sensitive	0.158373	0.711067	Sensitive	0.0443893	0.739085
CHD3	Sensitive	0.082732	0.741237	Sensitive	0.024149	0.711067	Sensitive	0.648009	1
TNC	Resistant	0.0241521	0.741237	Resistant	0.648009	1	Resistant	0.082732	0.739085
DHX38	Resistant	0.170815	0.741237	Resistant	0.0443878	0.711067	Resistant	0.170815	0.739085
RBL1	Sensitive	0.661461	1	Sensitive	0.0443893	0.711067	Sensitive	0.0443893	0.739085
ZFP62	Resistant	0.024149	0.741237	Resistant	0.313549	0.711067	Resistant	0.173734	0.739085
TMEM131	Sensitive	0.173743	0.741237	Sensitive	0.179713	0.711067	Sensitive	0.0443893	0.739085
TTC28	Sensitive	0.0132418	0.741237	Sensitive	0.651359	1	Sensitive	0.176709	0.739085
MYLK	Sensitive	0.0443893	0.741237	Sensitive	0.158373	0.711067	Sensitive	0.257677	0.739085
CYTB	Resistant	0.314385	0.741237	Resistant	0.564515	1	Resistant	0.0104307	0.739085
ITGA6	Resistant	0.987566	1	Resistant	0.0443893	0.711067	Resistant	0.0443893	0.739085
PPP5C	Sensitive	0.557656	1	Sensitive	0.0443893	0.711067	Sensitive	0.082732	0.739085
FBXO42	Sensitive	0.565723	1	Sensitive	0.082732	0.711067	Sensitive	0.0443893	0.739085
SIK3	Resistant	0.0443878	0.741237	Resistant	0.082732	0.711067	Resistant	0.573847	1
TXNRD2	Resistant	0.0443893	0.741237	Resistant	0.573847	1	Resistant	0.082732	0.739085
XRN2	Resistant	0.573847	1	Resistant	0.0443893	0.711067	Resistant	0.082732	0.739085
APEX2	Resistant	0.0443893	0.741237	Resistant	0.082732	0.711067	Resistant	0.573847	1
PCNT	Sensitive	0.299009	0.741237	Sensitive	0.148775	0.711067	Sensitive	0.0478122	0.739085
IKBKG	Sensitive	0.30859	0.741237	Sensitive	0.0443893	0.711067	Sensitive	0.158373	0.739085
MRC2	Sensitive	0.0443893	0.741237	Sensitive	0.158373	0.711067	Sensitive	0.30859	0.739085
ADCK1	Sensitive	0.30859	0.741237	Sensitive	0.0443893	0.711067	Sensitive	0.158373	0.739085
COBL	Sensitive	0.313553	0.741237	Sensitive	0.0443893	0.711067	Sensitive	0.158373	0.739085
NOC2L	Sensitive	0.158373	0.741237	Sensitive	0.318568	0.711067	Sensitive	0.0443893	0.739085
IWS1	Sensitive	0.322325	0.741237	Sensitive	0.158373	0.711067	Sensitive	0.0443893	0.739085
FHOD3	Sensitive	0.648009	1	Sensitive	0.0443893	0.711067	Sensitive	0.082732	0.739085
POLG	Sensitive	0.173743	0.741237	Sensitive	0.30859	0.711067	Sensitive	0.0443893	0.739085
FAM208A	Resistant	0.173741	0.741237	Resistant	0.313553	0.711067	Resistant	0.0443878	0.739085
PIF1	Sensitive	0.179713	0.741237	Sensitive	0.0443893	0.711067	Sensitive	0.318568	0.739085
THAP4	Sensitive	0.0443893	0.741237	Sensitive	0.323635	0.711067	Sensitive	0.182754	0.739085
ARHGEF18	Resistant	0.0946499	0.741237	Resistant	0.686444	1	Resistant	0.0443878	0.739085
EHMT1	Sensitive	0.993196	1	Sensitive	0.0313331	0.711067	Sensitive	0.0980663	0.739085
KIAA1468	Resistant	0.0443878	0.741237	Resistant	0.987566	1	Resistant	0.0827292	0.739085
PIEZO1	Sensitive	0.433082	0.985148	Sensitive	0.0208224	0.711067	Sensitive	0.402676	0.917878
C17orf70	Resistant	0.995855	1	Resistant	0.0443893	0.711067	Resistant	0.082732	0.739085
DVL1	Resistant	0.082732	0.741237	Resistant	0.0443893	0.711067	Resistant	1	1
TIAM1	Resistant	1	1	Resistant	0.082732	0.711067	Resistant	0.0443893	0.739085
ZNF335	Sensitive	1	1	Sensitive	0.0443893	0.711067	Sensitive	0.082732	0.739085
ZNF107	Sensitive	0.158368	0.741237	Sensitive	0.0443835	0.711067	Sensitive	0.557652	1
MAP3K9	Resistant	0.565723	1	Resistant	0.158373	0.711067	Resistant	0.0443893	0.739085
KIAA1549L	Resistant	0.0241521	0.741237	Resistant	0.557656	1	Resistant	0.30859	0.739085
PYGB	Sensitive	0.565723	1	Sensitive	0.0241521	0.711067	Sensitive	0.30859	0.739085
SYMPK	Sensitive	0.30859	0.741237	Sensitive	0.0443893	0.711067	Sensitive	0.30859	0.739085
SENP5	Resistant	0.323635	0.741237	Resistant	1	1	Resistant	0.0132418	0.739085
DHX34	Sensitive	0.557656	1	Sensitive	0.0443878	0.711067	Sensitive	0.173741	0.739085
TSC2	Resistant	0.675024	1	Resistant	0.0132422	0.711067	Resistant	0.49463	1
ABL1	Sensitive	0.0443893	0.741237	Resistant	0.648009	1	Resistant	0.158373	0.739085
ZNF326	Resistant	0.0241521	0.741237	Resistant	0.727633	1	Resistant	0.26102	0.739085
CCNK	Sensitive	0.322325	0.741237	Sensitive	0.0443893	0.711067	Resistant	0.323635	0.739085
NCLN	Sensitive	0.0443893	0.741237	Sensitive	0.173743	0.711067	Sensitive	0.63467	1
UBR4	Resistant	0.0241521	0.741237	Resistant	0.257677	0.711067	Resistant	1	1
SEL1L	Resistant	0.987566	1	Resistant	0.0443893	0.711067	Resistant	0.158373	0.739085
ZNF628	Resistant	1	1	Resistant	0.158373	0.711067	Resistant	0.0443878	0.739085
CEP250	Sensitive	0.654721	1	Sensitive	0.25108	0.711067	Sensitive	0.0443893	0.739085
MET	Sensitive	0.987566	1	Sensitive	0.0443893	0.711067	Sensitive	0.170815	0.739085
PHRF1	Sensitive	0.565723	1	Sensitive	0.0132422	0.711067	Sensitive	1	1
TCF20	Resistant	0.993196	1	Resistant	0.318568	0.711067	Resistant	0.0241513	0.739085
ESPL1	Sensitive	0.311061	0.741237	Sensitive	0.557656	1	Sensitive	0.0443893	0.739085
SART3	Sensitive	0.176709	0.741237	Sensitive	0.987566	1	Sensitive	0.0443893	0.739085
ABCC3	Sensitive	0.313553	0.741237	Sensitive	0.0443893	0.711067	Sensitive	0.557656	1
TARBP1	Sensitive	0.322325	0.741237	Sensitive	0.0443893	0.711067	Sensitive	0.557656	1
UGGT1	Resistant	0.0443893	0.741237	Resistant	0.565723	1	Resistant	0.318568	0.739085
KIAA0368	Resistant	0.557656	1	Resistant	0.323635	0.711067	Resistant	0.0443893	0.739085
RPS6KA4	Sensitive	0.322325	0.741237	Sensitive	0.0443893	0.711067	Sensitive	0.565723	1
CASK	Sensitive	0.569775	1	Sensitive	0.0443878	0.711067	Sensitive	0.321091	0.739085
KIAA0753	Sensitive	0.322325	0.741237	Sensitive	0.573847	1	Sensitive	0.0443893	0.739085
SIPA1L1	Resistant	0.0443893	0.741237	Resistant	0.30859	0.711067	Resistant	0.654721	1
C9orf3	Sensitive	0.634668	1	Sensitive	0.0443878	0.711067	Sensitive	0.322325	0.739085
DAXX	Sensitive	0.648009	1	Sensitive	0.0443893	0.711067	Sensitive	0.323635	0.739085
CREBBP	Resistant	1	1	Resistant	0.400941	0.878814	Resistant	0.0241521	0.739085
CTNNB1	Sensitive	0.654721	1	Sensitive	0.0241521	0.711067	Sensitive	0.709876	1
MON2	Sensitive	0.0443893	0.741237	Resistant	0.641325	1	Resistant	0.420339	0.953012
PLEKHH3	Sensitive	0.0241521	0.741237	Sensitive	0.986393	1	Resistant	0.557656	1
TANC1	Sensitive	0.30859	0.741237	Sensitive	1	1	Sensitive	0.0443893	0.739085
JARID2	Sensitive	0.557652	1	Sensitive	0.0443878	0.711067	Sensitive	0.557652	1
IBTK	Resistant	0.557656	1	Resistant	0.0443893	0.711067	Resistant	0.557656	1
REXO1	Sensitive	0.995855	1	Sensitive	0.0443878	0.711067	Sensitive	0.318554	0.739085
USP1	Sensitive	0.0443893	0.741237	Sensitive	0.573847	1	Sensitive	0.557656	1
TRIM16	Resistant	0.995855	1	Resistant	0.0443893	0.711067	Resistant	0.323635	0.739085
FANCD2	Sensitive	1	1	Sensitive	0.641325	1	Sensitive	0.0241521	0.739085
FAM178A	Sensitive	0.024149	0.741237	Resistant	0.995855	1	Resistant	0.654714	1
PTEN	Sensitive	0.691078	1	Sensitive	0.64872	1	Sensitive	0.0458372	0.739085
CDCA2	Sensitive	0.0443893	0.741237	Resistant	0.733585	1	Resistant	0.668229	1
EZH1	Resistant	0.0443893	0.741237	Resistant	0.987566	1	Resistant	0.557656	1
MAP4	Sensitive	0.995855	1	Resistant	0.557656	1	Resistant	0.0443893	0.739085
OCRL	Resistant	0.557656	1	Resistant	1	1	Resistant	0.0443893	0.739085
KDM5B	Resistant	0.0443893	0.741237	Resistant	0.557656	1	Resistant	1	1
TRIM11	Resistant	0.557656	1	Resistant	0.0443893	0.711067	Resistant	1	1
MED13	Resistant	0.0443893	0.741237	Resistant	0.565723	1	Resistant	1	1
PIK3R4	Sensitive	0.573847	1	Resistant	1	1	Resistant	0.0443893	0.739085
TEP1	Sensitive	0.0443893	0.741237	Sensitive	0.987566	1	Sensitive	0.63467	1
ASMTL	Resistant	0.641323	1	Resistant	0.0443893	0.711067	Resistant	1	1
ZNF646	Sensitive	0.654721	1	Sensitive	0.0443893	0.711067	Resistant	0.995855	1
FN1	Sensitive	0.0443893	0.741237	Sensitive	1	1	Sensitive	1	1
LAMC2	Resistant	1	1	Resistant	1	1	Resistant	0.0443893	0.739085
VWA1	Sensitive	0.0441194	0.616055	Sensitive	0.312632	0.620969	Sensitive	0.0826014	0.612682
TET2	Sensitive	0.0238636	0.616055	Sensitive	0.158636	0.620969	Sensitive	0.306469	0.612682
GTF3C1	Sensitive	0.0441194	0.616055	Sensitive	0.0826014	0.620969	Sensitive	0.318877	0.612682
KANK2	Sensitive	0.318877	0.616055	Sensitive	0.0826014	0.620969	Sensitive	0.0441194	0.612682
CSPP1	Sensitive	0.318877	0.616055	Sensitive	0.0826014	0.620969	Sensitive	0.0441194	0.612682
NUP214	Sensitive	0.0441171	0.616055	Sensitive	0.322024	0.620969	Sensitive	0.0826014	0.612682
ABTB2	Sensitive	0.323555	0.616055	Sensitive	0.0826014	0.620969	Sensitive	0.0441194	0.612682
MAGEF1	Sensitive	0.0441194	0.616055	Sensitive	0.323555	0.620969	Sensitive	0.0826014	0.612682
BTN3A1	Sensitive	0.0441194	0.616055	Sensitive	0.0826014	0.620969	Sensitive	0.325202	0.612682
MTIF2	Sensitive	0.0441194	0.616055	Sensitive	0.325202	0.620969	Sensitive	0.0826014	0.612682
ITSN2	Sensitive	0.0129901	0.616055	Sensitive	0.249667	0.620969	Sensitive	0.415743	0.778466
STAM2	Sensitive	0.175974	0.616055	Sensitive	0.0441194	0.620969	Sensitive	0.175974	0.612682
NSD1	Sensitive	0.0325593	0.616055	Sensitive	0.099161	0.620969	Sensitive	0.428039	0.800265
DICER1	Sensitive	0.385931	0.729967	Sensitive	0.0441194	0.620969	Sensitive	0.0826014	0.612682
KIAA0586	Sensitive	0.325202	0.616055	Sensitive	0.18351	0.620969	Sensitive	0.0238648	0.612682
C2orf44	Sensitive	0.325202	0.616055	Sensitive	0.0238648	0.620969	Sensitive	0.18351	0.612682
PI4KA	Sensitive	0.391786	0.740661	Sensitive	0.0826014	0.620969	Sensitive	0.0441194	0.612682
PRSS3	Sensitive	0.0441194	0.616055	Sensitive	0.0826014	0.620969	Sensitive	0.391786	0.736866
ZNF107	Sensitive	0.0441194	0.616055	Sensitive	0.1816	0.620969	Sensitive	0.1816	0.612682
FAM83D	Sensitive	0.103597	0.616055	Sensitive	0.325202	0.620969	Sensitive	0.0441194	0.612682
MYCBP2	Sensitive	0.0101303	0.616055	Sensitive	0.319467	0.620969	Sensitive	0.506877	0.943497
CRYBG3	Sensitive	0.253754	0.616055	Sensitive	0.253754	0.620969	Sensitive	0.0266808	0.612682
FLNB	Sensitive	0.556149	0.964841	Sensitive	0.0947312	0.620969	Sensitive	0.0329388	0.612682
TAF5L	Sensitive	0.0441194	0.616055	Sensitive	0.10136	0.620969	Sensitive	0.409674	0.767755
USP20	Sensitive	0.994836	1	Resistant	0.0441194	0.620969	Resistant	0.0441194	0.612682
MALT1	Resistant	1	1	Resistant	0.0826014	0.620969	Resistant	0.0238636	0.612682
MAGI1	Sensitive	0.0238648	0.616055	Sensitive	0.0826014	0.620969	Resistant	1	1
KDM6B	Sensitive	0.0441194	0.616055	Sensitive	0.556177	0.973275	Sensitive	0.0826014	0.612682
USP9X	Sensitive	0.0129895	0.616055	Sensitive	0.158636	0.620969	Resistant	0.994836	1
PIK3R1	Sensitive	0.566219	0.964841	Sensitive	0.0441194	0.620969	Sensitive	0.0826014	0.612682
EXPH5	Sensitive	0.0826014	0.616055	Sensitive	0.566219	0.973275	Sensitive	0.0441194	0.612682
DHX37	Sensitive	0.566219	0.964841	Sensitive	0.0826014	0.620969	Sensitive	0.0441194	0.612682
MESDC1	Resistant	0.566219	0.964841	Resistant	0.0441194	0.620969	Resistant	0.0826014	0.612682
MAT2B	Sensitive	0.0826014	0.616055	Sensitive	0.0441194	0.620969	Sensitive	0.566219	0.968374
PIGS	Sensitive	0.576346	0.964841	Sensitive	0.0441194	0.620969	Sensitive	0.0826014	0.612682
KDM5B	Sensitive	0.158636	0.616055	Sensitive	0.556177	0.973275	Sensitive	0.0238648	0.612682
RTF1	Sensitive	0.158636	0.616055	Sensitive	0.306469	0.620969	Sensitive	0.0441194	0.612682
TMEM201	Sensitive	0.0441104	0.616055	Sensitive	0.318856	0.620969	Sensitive	0.158627	0.612682
ZC3H4	Sensitive	0.318877	0.616055	Sensitive	0.0441194	0.620969	Sensitive	0.158636	0.612682
UBR5	Sensitive	0.0441194	0.616055	Sensitive	0.318877	0.620969	Sensitive	0.158636	0.612682
ASCC2	Sensitive	0.318877	0.616055	Sensitive	0.0441194	0.620969	Sensitive	0.158636	0.612682
BAZ2A	Sensitive	0.0238648	0.616055	Sensitive	0.306469	0.620969	Sensitive	0.306469	0.612682
BTBD7	Sensitive	0.0441194	0.616055	Sensitive	0.158636	0.620969	Sensitive	0.323555	0.612682
FAM189B	Resistant	0.0441194	0.616055	Resistant	0.158636	0.620969	Resistant	0.325202	0.612682
TJP2	Sensitive	0.158636	0.616055	Sensitive	0.325202	0.620969	Sensitive	0.0441194	0.612682
TRAPPC8	Sensitive	0.325202	0.616055	Sensitive	0.158636	0.620969	Sensitive	0.0441194	0.612682
HSPH1	Sensitive	0.168671	0.616055	Sensitive	0.0441194	0.620969	Sensitive	0.306469	0.612682
ATP11A	Sensitive	0.168671	0.616055	Sensitive	0.0238648	0.620969	Sensitive	0.576346	0.968374
SEC23IP	Sensitive	0.556177	0.964841	Sensitive	0.0238648	0.620969	Sensitive	0.175974	0.612682
ERBB2	Resistant	0.566219	0.964841	Resistant	0.0948776	0.620969	Resistant	0.0441194	0.612682
ARHGEF18	Sensitive	0.0441194	0.616055	Sensitive	0.312632	0.620969	Sensitive	0.172293	0.612682
SMG6	Sensitive	0.0826014	0.616055	Sensitive	0.65471	1	Sensitive	0.0441171	0.612682
CHD2	Sensitive	0.654721	1	Sensitive	0.0826014	0.620969	Sensitive	0.0441194	0.612682
VPS11	Sensitive	0.654666	1	Sensitive	0.158627	0.620969	Sensitive	0.023841	0.612682
ABCA2	Sensitive	0.415743	0.781123	Sensitive	0.253754	0.620969	Sensitive	0.0238648	0.612682
RPAP2	Sensitive	0.415743	0.781123	Sensitive	0.253754	0.620969	Sensitive	0.0238648	0.612682
BCL9L	Sensitive	0.576346	0.964841	Sensitive	0.0238648	0.620969	Sensitive	0.18351	0.612682
VPS26B	Sensitive	0.0441194	0.616055	Sensitive	0.325202	0.620969	Sensitive	0.179713	0.612682
ND1	Resistant	0.165644	0.616055	Resistant	0.663129	1	Resistant	0.0238648	0.612682
ARHGEF16	Sensitive	0.0441194	0.616055	Sensitive	0.18351	0.620969	Sensitive	0.325202	0.612682
ZFHX3	Resistant	0.646357	1	Resistant	0.099161	0.620969	Resistant	0.0441194	0.612682
GPBP1	Sensitive	0.0441194	0.616055	Sensitive	0.409674	0.778756	Sensitive	0.158636	0.612682
DARS2	Sensitive	0.0238648	0.616055	Sensitive	0.18351	0.620969	Sensitive	0.654721	1
HLA-G	Resistant	0.680072	1	Resistant	0.0441194	0.620969	Resistant	0.099161	0.612682
ASCC3	Sensitive	0.162832	0.616055	Sensitive	0.768879	1	Sensitive	0.0238648	0.612682
NFATC3	Sensitive	0.0441194	0.616055	Sensitive	0.397692	0.757817	Sensitive	0.172293	0.612682
PPP1R26	Resistant	0.778951	1	Resistant	0.0187085	0.620969	Resistant	0.21046	0.612682
SREBF1	Sensitive	0.415743	0.781123	Sensitive	0.312632	0.620969	Sensitive	0.0238648	0.612682
UNC13B	Sensitive	0.434262	0.812872	Sensitive	0.18351	0.620969	Sensitive	0.0441171	0.612682
SNX5	Sensitive	0.0441194	0.616055	Resistant	0.994836	1	Resistant	0.0826014	0.612682
FUBP1	Sensitive	1	1	Sensitive	0.0826014	0.620969	Sensitive	0.0441194	0.612682
AP1B1	Resistant	1	1	Resistant	0.158636	0.620969	Resistant	0.0238648	0.612682
AXIN1	Sensitive	0.158636	0.616055	Sensitive	0.566219	0.973275	Sensitive	0.0441194	0.612682
FAM115A	Sensitive	0.0441194	0.616055	Sensitive	0.566219	0.973275	Sensitive	0.158636	0.612682
ENDOD1	Sensitive	0.0441194	0.616055	Sensitive	0.158636	0.620969	Sensitive	0.576346	0.968374
CENPB	Sensitive	0.306469	0.616055	Sensitive	0.0441194	0.620969	Sensitive	0.306469	0.612682
DIS3L2	Sensitive	0.312632	0.616055	Sensitive	0.0238648	0.620969	Sensitive	0.556177	0.968374
RAF1	Resistant	0.984508	1	Resistant	0.0238648	0.620969	Resistant	0.179713	0.612682
TBC1D2B	Sensitive	0.0441194	0.616055	Sensitive	0.312632	0.620969	Sensitive	0.312632	0.612682
PHIP	Sensitive	0.0441194	0.616055	Sensitive	0.306469	0.620969	Sensitive	0.325202	0.612682
KIAA1244	Sensitive	0.179713	0.616055	Sensitive	0.0441194	0.620969	Resistant	0.556177	0.968374
PDP1	Sensitive	0.318877	0.616055	Sensitive	0.318877	0.620969	Sensitive	0.0441194	0.612682
EHD1	Sensitive	0.566219	0.964841	Sensitive	0.0441194	0.620969	Sensitive	0.179713	0.612682
ZZZ3	Resistant	0.994836	1	Resistant	0.0441194	0.620969	Resistant	0.103597	0.612682
FAM83G	Sensitive	0.0441194	0.616055	Sensitive	0.323555	0.620969	Sensitive	0.323555	0.612682
HERC1	Resistant	0.974108	1	Resistant	0.0307226	0.620969	Resistant	0.154611	0.612682
MYO1C	Resistant	0.663129	1	Resistant	0.158636	0.620969	Resistant	0.0441194	0.612682
HEBP1	Sensitive	0.0441194	0.616055	Sensitive	0.323555	0.620969	Sensitive	0.325202	0.612682
JMJD8	Sensitive	0.325202	0.616055	Sensitive	0.0441194	0.620969	Sensitive	0.325202	0.612682
ALS2	Sensitive	0.696309	1	Sensitive	0.0441194	0.620969	Sensitive	0.172293	0.612682
KNTC1	Sensitive	0.0441194	0.616055	Sensitive	0.325202	0.620969	Sensitive	0.434265	0.810667
PIEZO1	Sensitive	0.0476354	0.616055	Sensitive	0.206777	0.620969	Sensitive	0.635752	1
KLF10	Sensitive	0.984508	1	Sensitive	0.0441194	0.620969	Sensitive	0.158636	0.612682
N4BP2L2	Resistant	0.984508	1	Resistant	0.158636	0.620969	Resistant	0.0441194	0.612682
PLEKHH1	Sensitive	0.994836	1	Sensitive	0.158636	0.620969	Sensitive	0.0441194	0.612682
ARHGAP39	Sensitive	0.994836	1	Sensitive	0.0441194	0.620969	Sensitive	0.158636	0.612682
USP40	Resistant	0.172293	0.616055	Resistant	0.984508	1	Resistant	0.0441171	0.612682
ELMO2	Sensitive	0.306469	0.616055	Sensitive	0.0441194	0.620969	Sensitive	0.556177	0.968374
ZNF354A	Sensitive	0.994836	1	Sensitive	0.0238648	0.620969	Sensitive	0.318877	0.612682
FBXW5	Sensitive	0.0441194	0.616055	Sensitive	0.172293	0.620969	Resistant	1	1
STXBP5	Sensitive	0.312632	0.616055	Sensitive	0.0441194	0.620969	Sensitive	0.556177	0.968374
MGA	Resistant	0.718351	1	Resistant	0.325202	0.620969	Resistant	0.0329388	0.612682
ANKRD52	Sensitive	0.576346	0.964841	Sensitive	0.0441194	0.620969	Resistant	0.312632	0.612682
FAM21C	Sensitive	0.566219	0.964841	Sensitive	0.318877	0.620969	Sensitive	0.0441194	0.612682
ANKRD18A	Sensitive	0.0441104	0.616055	Sensitive	0.571266	0.973275	Sensitive	0.318856	0.612682
KIAA1217	Sensitive	0.0441194	0.616055	Sensitive	0.318877	0.620969	Sensitive	0.576346	0.968374
KIAA1551	Sensitive	0.0441194	0.616055	Sensitive	0.325202	0.620969	Resistant	0.566219	0.968374
DYM	Sensitive	0.0441171	0.616055	Sensitive	0.576346	0.973275	Sensitive	0.325197	0.612682
NCOR1	Sensitive	0.325202	0.616055	Sensitive	0.0441194	0.620969	Sensitive	0.576346	0.968374
TBC1D23	Sensitive	0.0441194	0.616055	Sensitive	0.325202	0.620969	Sensitive	0.576346	0.968374
MICAL3	Sensitive	0.262065	0.616055	Sensitive	0.0321844	0.620969	Resistant	0.983025	1
SMAD6	Sensitive	0.312632	0.616055	Sensitive	0.0441194	0.620969	Sensitive	0.646357	1
NMRAL1	Sensitive	0.646357	1	Sensitive	0.0441194	0.620969	Sensitive	0.318877	0.612682
FASTKD1	Sensitive	0.663129	1	Sensitive	0.318877	0.620969	Sensitive	0.0441194	0.612682
TAF1	Sensitive	0.671569	1	Sensitive	0.0441171	0.620969	Sensitive	0.322024	0.612682
ZNFX1	Sensitive	0.415743	0.781123	Resistant	0.556177	0.973275	Resistant	0.0441194	0.612682
TFIP11	Resistant	0.995756	1	Resistant	0.237678	0.620969	Resistant	0.0441194	0.612682
PAXIP1	Sensitive	0.0441194	0.616055	Sensitive	0.421864	0.799445	Sensitive	0.576346	0.968374
ZNF28	Resistant	0.0441171	0.616055	Resistant	0.409674	0.778756	Resistant	0.629763	1
KDM3B	Sensitive	0.0441194	0.616055	Sensitive	0.312632	0.620969	Resistant	1	1
TECPR1	Sensitive	0.0441194	0.616055	Sensitive	0.556177	0.973275	Sensitive	0.566219	0.968374
DEF8	Sensitive	0.0441194	0.616055	Sensitive	0.556177	0.973275	Sensitive	0.566219	0.968374
BAG3	Sensitive	0.556177	0.964841	Sensitive	0.0441194	0.620969	Sensitive	0.576346	0.968374
C1orf106	Sensitive	0.325202	0.616055	Resistant	0.994836	1	Resistant	0.0441194	0.612682
CCAR1	Sensitive	0.0441194	0.616055	Resistant	1	1	Resistant	0.323555	0.612682
USO1	Sensitive	0.576346	0.964841	Sensitive	0.576346	0.973275	Sensitive	0.0441194	0.612682
RIN1	Sensitive	0.576346	0.964841	Sensitive	0.576346	0.973275	Sensitive	0.0441194	0.612682
SLC35E2B	Sensitive	0.0441194	0.616055	Sensitive	0.576346	0.973275	Sensitive	0.576346	0.968374
NFKB1	Resistant	0.663129	1	Resistant	0.0441194	0.620969	Resistant	0.556177	0.968374
CTNND1	Sensitive	0.663129	1	Sensitive	0.576346	0.973275	Sensitive	0.0441194	0.612682
ARHGAP21	Sensitive	0.663129	1	Sensitive	0.0441194	0.620969	Sensitive	0.671579	1
SBF1	Sensitive	0.556172	0.964841	Sensitive	0.984508	1	Sensitive	0.0441171	0.612682
STX18	Sensitive	0.0441194	0.616055	Sensitive	0.556177	0.973275	Sensitive	0.984508	1
REV3L	Resistant	0.987268	1	Resistant	0.0441171	0.620969	Resistant	0.556177	0.968374
NEO1	Sensitive	1	1	Sensitive	0.0441194	0.620969	Sensitive	0.556177	0.968374
ATP7B	Sensitive	0.994836	1	Sensitive	0.0441194	0.620969	Resistant	0.566219	0.968374
C16orf59	Sensitive	0.576346	0.964841	Resistant	0.984508	1	Resistant	0.0441194	0.612682
SUGP1	Sensitive	0.0441194	0.616055	Resistant	1	1	Resistant	0.576346	0.968374
IGSF8	Resistant	1	1	Resistant	0.0441194	0.620969	Resistant	0.576346	0.968374
ATXN2L	Resistant	1	1	Resistant	0.629763	1	Resistant	0.0441194	0.612682
ZNF770	Resistant	0.680072	1	Resistant	1	1	Resistant	0.0441194	0.612682
LPHN2	Resistant	0.984508	1	Resistant	0.984508	1	Resistant	0.0441194	0.612682
TOP3A	Sensitive	1	1	Resistant	0.0441194	0.620969	Resistant	1	1
ITFG3	Sensitive	0.0441194	0.616055	Resistant	1	1	Resistant	1	1
TENM2	Sensitive	0.178051	0.584284	Sensitive	0.0448839	0.543057	Sensitive	0.178051	0.560105
DHX32	Sensitive	0.0246817	0.584284	Sensitive	0.179712	0.543057	Sensitive	0.320794	0.560105
GABBR1	Sensitive	0.320794	0.584284	Sensitive	0.179712	0.543057	Sensitive	0.0246817	0.560105
VARS2	Sensitive	0.181386	0.584284	Sensitive	0.0246817	0.543057	Sensitive	0.320794	0.560105
XRN2	Resistant	0.179712	0.584284	Resistant	0.0448839	0.543057	Resistant	0.178051	0.560105
ACAD10	Sensitive	0.704649	1	Sensitive	0.149085	0.543057	Sensitive	0.0137106	0.560105
USP40	Resistant	0.151398	0.584284	Resistant	0.698189	0.939335	Resistant	0.0137105	0.560105
KIAA2018	Resistant	0.0448839	0.584284	Resistant	0.179712	0.543057	Resistant	0.179712	0.560105
ALS2	Resistant	0.260977	0.584284	Resistant	0.0137106	0.543057	Resistant	0.406868	0.702262
APMAP	Sensitive	0.0448839	0.584284	Sensitive	0.181386	0.543057	Sensitive	0.181386	0.560105
FAM83D	Sensitive	0.181386	0.584284	Sensitive	0.181386	0.543057	Sensitive	0.0448839	0.560105
ACTR3B	Sensitive	0.102966	0.584284	Sensitive	0.0448839	0.543057	Sensitive	0.320794	0.560105
NFXL1	Resistant	0.0448839	0.584284	Resistant	0.08297	0.543057	Resistant	0.412205	0.7066
CCDC66	Resistant	0.0448839	0.584284	Resistant	0.416234	0.688697	Resistant	0.08297	0.560105
CTDP1	Sensitive	0.738885	1	Sensitive	0.0108316	0.543057	Sensitive	0.198783	0.560105
VPS13C	Sensitive	0.771706	1	Sensitive	0.0435097	0.543057	Sensitive	0.0489763	0.560105
SRCAP	Resistant	0.995989	1	Resistant	0.450547	0.739298	Resistant	0.00378505	0.560105
IBTK	Resistant	0.1764	0.584284	Resistant	0.0318082	0.543057	Resistant	0.312474	0.560105
PASK	Sensitive	0.0448839	0.584284	Sensitive	0.0948199	0.543057	Sensitive	0.413545	0.708236
TANC2	Resistant	0.0448835	0.584284	Resistant	0.0980992	0.543057	Resistant	0.401572	0.696505
KANK2	Sensitive	0.406868	0.732815	Sensitive	0.0980997	0.543057	Sensitive	0.0448839	0.560105
DIAPH1	Resistant	0.179712	0.584284	Resistant	0.412205	0.685783	Resistant	0.0246817	0.560105
HSPG2	Sensitive	0.0375948	0.584284	Sensitive	0.0875086	0.543057	Sensitive	0.583711	0.841889
GSE1	Sensitive	0.605325	0.903842	Sensitive	0.246697	0.543057	Sensitive	0.0128682	0.560105
PTPRU	Sensitive	0.417583	0.739059	Sensitive	0.0448839	0.543057	Sensitive	0.102966	0.560105
KLHL36	Sensitive	0.102966	0.584284	Sensitive	0.0448839	0.543057	Sensitive	0.417583	0.709963
SIPA1L3	Resistant	0.00766603	0.584284	Resistant	0.255473	0.543057	Resistant	0.996251	1
EXPH5	Sensitive	0.0448839	0.584284	Resistant	0.99771	1	Resistant	0.0448839	0.560105
ZDHHC23	Resistant	1	1	Resistant	0.0448835	0.543057	Resistant	0.0448835	0.560105
GLI3	Sensitive	0.0448839	0.584284	Sensitive	1	1	Sensitive	0.0448839	0.560105
NKIRAS2	Sensitive	1	1	Sensitive	0.0448839	0.543057	Sensitive	0.0448839	0.560105
SLC9A1	Sensitive	0.08297	0.584284	Resistant	0.985003	1	Resistant	0.0246817	0.560105
STX18	Sensitive	0.0246817	0.584284	Sensitive	0.1764	0.543057	Sensitive	0.46754	0.789775
EPHB6	Sensitive	0.08297	0.584284	Sensitive	0.0246815	0.543057	Resistant	1	1
OSBP	Sensitive	0.0246817	0.584284	Sensitive	0.08297	0.543057	Sensitive	1	1
HDHD2	Resistant	1	1	Resistant	0.08297	0.543057	Resistant	0.0246817	0.560105
ALMS1	Sensitive	0.482679	0.845572	Sensitive	0.0334694	0.543057	Sensitive	0.127476	0.560105
KIF1C	Sensitive	0.414889	0.73761	Sensitive	0.0311637	0.543057	Sensitive	0.160928	0.560105
KCMF1	Resistant	0.0448839	0.584284	Resistant	0.08297	0.543057	Resistant	0.560355	0.82143
SERINC1	Sensitive	0.560355	0.850978	Sensitive	0.08297	0.543057	Sensitive	0.0448839	0.560105
EDC3	Sensitive	0.560355	0.850978	Sensitive	0.08297	0.543057	Sensitive	0.0448839	0.560105
AGPAT9	Sensitive	0.560355	0.850978	Sensitive	0.0448839	0.543057	Sensitive	0.08297	0.560105
SHPRH	Sensitive	0.560355	0.850978	Sensitive	0.08297	0.543057	Sensitive	0.0448839	0.560105
BIRC6	Sensitive	0.0166298	0.584284	Sensitive	0.346523	0.585622	Sensitive	0.36303	0.631545
CLASRP	Resistant	0.658436	0.953036	Resistant	0.0321346	0.543057	Resistant	0.099058	0.560105
KLHL13	Sensitive	0.564816	0.850978	Sensitive	0.0829666	0.543057	Sensitive	0.0448795	0.560105
C16orf95	Resistant	0.564816	0.850978	Resistant	0.0448795	0.543057	Resistant	0.0829666	0.560105
DNM2	Resistant	0.56482	0.850978	Resistant	0.08297	0.543057	Resistant	0.0448839	0.560105
IFNAR2	Sensitive	0.56482	0.850978	Sensitive	0.08297	0.543057	Sensitive	0.0448839	0.560105
DDX20	Sensitive	0.56482	0.850978	Sensitive	0.0448839	0.543057	Sensitive	0.08297	0.560105
SIRT3	Sensitive	0.56482	0.850978	Sensitive	0.0448839	0.543057	Sensitive	0.08297	0.560105
LYAR	Sensitive	0.56482	0.850978	Sensitive	0.08297	0.543057	Sensitive	0.0448839	0.560105
PRUNE2	Sensitive	0.567058	0.850978	Sensitive	0.08297	0.543057	Sensitive	0.0448835	0.560105
FBXW5	Sensitive	0.0137106	0.584284	Sensitive	0.157302	0.543057	Resistant	0.982091	1
MECOM	Sensitive	0.569302	0.850978	Sensitive	0.08297	0.543057	Sensitive	0.0448839	0.560105
IGFBP4	Sensitive	0.569302	0.850978	Sensitive	0.0448839	0.543057	Sensitive	0.08297	0.560105
ORC1	Sensitive	0.569302	0.850978	Sensitive	0.0448839	0.543057	Sensitive	0.08297	0.560105
IRS2	Sensitive	0.569302	0.850978	Sensitive	0.08297	0.543057	Sensitive	0.0448839	0.560105
STARD3	Sensitive	0.0448839	0.584284	Sensitive	0.569302	0.802606	Sensitive	0.08297	0.560105
PSIP1	Sensitive	0.569302	0.850978	Sensitive	0.0448839	0.543057	Sensitive	0.08297	0.560105
ZNF496	Resistant	0.08297	0.584284	Resistant	0.569302	0.802606	Resistant	0.0448839	0.560105
SCAP	Sensitive	0.704649	1	Sensitive	0.0914415	0.543057	Sensitive	0.0331314	0.560105
MKL1	Sensitive	0.262829	0.584284	Sensitive	0.253656	0.543057	Sensitive	0.0327962	0.560105
NOTCH1	Sensitive	0.786404	1	Sensitive	0.0893082	0.543057	Sensitive	0.0311517	0.560105
LPIN3	Sensitive	0.157893	0.584284	Sensitive	0.0448839	0.543057	Sensitive	0.312474	0.560105
JUND	Resistant	0.0246817	0.584284	Resistant	0.157893	0.543057	Resistant	0.569302	0.82143
EPN1	Sensitive	0.157893	0.584284	Sensitive	0.315231	0.543057	Sensitive	0.0448839	0.560105
SLTM	Sensitive	0.157893	0.584284	Sensitive	0.0448839	0.543057	Sensitive	0.315231	0.560105
DDX24	Sensitive	0.157893	0.584284	Sensitive	0.318005	0.543057	Sensitive	0.0448839	0.560105
MAU2	Resistant	0.319397	0.584284	Resistant	0.157893	0.543057	Resistant	0.0448835	0.560105
DNAJB9	Sensitive	0.320084	0.584284	Sensitive	0.0448839	0.543057	Sensitive	0.157893	0.560105
ZMYND11	Resistant	0.0448839	0.584284	Resistant	0.320084	0.543057	Resistant	0.157893	0.560105
USP25	Resistant	0.320084	0.584284	Resistant	0.0448839	0.543057	Resistant	0.157893	0.560105
HR	Resistant	0.320084	0.584284	Resistant	0.157893	0.543057	Resistant	0.0448839	0.560105
DSEL	Sensitive	0.320084	0.584284	Sensitive	0.0448839	0.543057	Sensitive	0.157893	0.560105
CLIP2	Sensitive	0.320794	0.584284	Sensitive	0.0448839	0.543057	Sensitive	0.157893	0.560105
ZFP36	Sensitive	0.157893	0.584284	Sensitive	0.320794	0.543057	Sensitive	0.0448839	0.560105
IER5L	Resistant	0.0448839	0.584284	Resistant	0.320794	0.543057	Resistant	0.157893	0.560105
IFT81	Resistant	0.08297	0.584284	Resistant	0.0448839	0.543057	Resistant	0.643626	0.91874
PDCD6	Sensitive	0.654721	0.953036	Sensitive	0.0448839	0.543057	Sensitive	0.08297	0.560105
AHI1	Resistant	0.0448839	0.584284	Resistant	0.654721	0.898253	Resistant	0.08297	0.560105
SETD6	Sensitive	0.312474	0.584284	Sensitive	0.0448839	0.543057	Sensitive	0.174761	0.560105
SPRTN	Sensitive	0.0448839	0.584284	Sensitive	0.658436	0.898253	Sensitive	0.08297	0.560105
BSDC1	Sensitive	0.0448839	0.584284	Sensitive	0.08297	0.543057	Sensitive	0.66216	0.919474
PARP9	Resistant	0.665892	0.954516	Resistant	0.08297	0.543057	Resistant	0.0448839	0.560105
APEX2	Resistant	0.0448839	0.584284	Resistant	0.08297	0.543057	Resistant	0.665892	0.919474
EXOC4	Resistant	0.993132	1	Resistant	0.0246817	0.543057	Resistant	0.102966	0.560105
CREBBP	Sensitive	0.55077	0.850978	Sensitive	0.23213	0.543057	Sensitive	0.0197468	0.560105
DHX37	Sensitive	0.992501	1	Sensitive	0.0569132	0.543057	Sensitive	0.0448839	0.560105
CCM2	Sensitive	0.312474	0.584284	Sensitive	0.0448839	0.543057	Sensitive	0.181386	0.560105
USP42	Sensitive	0.254563	0.584284	Sensitive	0.316385	0.543057	Sensitive	0.0331314	0.560105
NSD1	Sensitive	0.0347367	0.584284	Sensitive	0.152565	0.543057	Sensitive	0.522919	0.82143
MAP3K9	Resistant	0.651014	0.953036	Resistant	0.0448835	0.543057	Resistant	0.0980992	0.560105
ARHGAP23	Sensitive	0.654721	0.953036	Resistant	0.100024	0.543057	Resistant	0.0448839	0.560105
RAF1	Sensitive	0.665892	0.954516	Sensitive	0.0246817	0.543057	Sensitive	0.179712	0.560105
ATXN2	Resistant	0.101978	0.584284	Resistant	0.651014	0.898253	Resistant	0.0448839	0.560105
ZZZ3	Resistant	0.259133	0.584284	Resistant	0.0448839	0.543057	Resistant	0.256384	0.560105
PCM1	Resistant	0.472557	0.829819	Resistant	0.0183561	0.543057	Resistant	0.350637	0.611048
PIEZO1	Sensitive	0.701721	0.999786	Sensitive	0.0212862	0.543057	Sensitive	0.203962	0.560105
STAM2	Sensitive	0.315231	0.584284	Sensitive	0.0137106	0.543057	Sensitive	0.707887	0.968355
SORL1	Sensitive	0.704649	1	Sensitive	0.0980997	0.543057	Sensitive	0.0448839	0.560105
PHRF1	Sensitive	0.255473	0.584284	Sensitive	0.0187408	0.543057	Resistant	0.665892	0.919474
HCFC1	Sensitive	0.0302077	0.584284	Sensitive	0.230817	0.543057	Sensitive	0.462552	0.782434
KIAA0430	Resistant	1	1	Resistant	0.102966	0.543057	Resistant	0.032464	0.560105
AKR1B15	Resistant	0.414889	0.73761	Resistant	0.181386	0.543057	Resistant	0.0448839	0.560105
DYNC1H1	Sensitive	0.985395	1	Sensitive	0.130453	0.543057	Sensitive	0.0269354	0.560105
DAXX	Sensitive	0.417583	0.739059	Sensitive	0.0334694	0.543057	Sensitive	0.262829	0.560105
DYNC2H1	Resistant	0.654719	0.953036	Resistant	0.41086	0.685783	Resistant	0.0137101	0.560105
COG6	Sensitive	1	1	Sensitive	0.0448835	0.543057	Sensitive	0.0829692	0.560105
AP1G1	Resistant	1	1	Resistant	0.0448839	0.543057	Resistant	0.08297	0.560105
LENG8	Sensitive	0.0448839	0.584284	Resistant	1	1	Resistant	0.08297	0.560105
ARID5B	Sensitive	0.0246815	0.584284	Sensitive	0.994376	1	Sensitive	0.154328	0.560105
ADCY6	Resistant	0.0246817	0.584284	Resistant	0.157893	0.543057	Resistant	1	1
MAGI1	Sensitive	0.301724	0.584284	Sensitive	0.0314845	0.543057	Sensitive	0.412205	0.7066
PRICKLE3	Resistant	0.157893	0.584284	Resistant	0.0448821	0.543057	Resistant	0.560354	0.82143
SAMD4B	Sensitive	0.560355	0.850978	Sensitive	0.0448839	0.543057	Sensitive	0.157893	0.560105
XAB2	Resistant	0.0448839	0.584284	Resistant	0.560355	0.802606	Resistant	0.157893	0.560105
KLHL22	Sensitive	0.56482	0.850978	Sensitive	0.157893	0.543057	Sensitive	0.0448839	0.560105
SSX2IP	Sensitive	0.157893	0.584284	Sensitive	0.56482	0.802606	Sensitive	0.0448839	0.560105
TRAPPC8	Sensitive	0.567058	0.850978	Sensitive	0.0448839	0.543057	Sensitive	0.157893	0.560105
SP4	Sensitive	0.0448839	0.584284	Sensitive	0.157893	0.543057	Sensitive	0.569302	0.82143
CCNK	Sensitive	0.157893	0.584284	Sensitive	0.0448839	0.543057	Resistant	0.569302	0.82143
ZDHHC20	Resistant	0.569302	0.850978	Resistant	0.0448839	0.543057	Resistant	0.157893	0.560105
TNC	Resistant	0.032464	0.584284	Resistant	0.707887	0.948558	Resistant	0.1764	0.560105
KIF18B	Sensitive	0.720892	1	Sensitive	0.0321346	0.543057	Sensitive	0.1764	0.560105
SENP5	Resistant	0.260974	0.584284	Resistant	0.651014	0.898253	Resistant	0.0246817	0.560105
C6orf141	Resistant	0.178036	0.584284	Resistant	0.990626	1	Resistant	0.0246793	0.560105
USP28	Sensitive	0.560355	0.850978	Sensitive	0.0246817	0.543057	Sensitive	0.315231	0.560105
AIFM2	Resistant	0.0448839	0.584284	Resistant	0.312474	0.543057	Resistant	0.312474	0.560105
GPATCH2	Resistant	0.312474	0.584284	Resistant	0.315231	0.543057	Resistant	0.0448839	0.560105
ZNF354A	Sensitive	1	1	Sensitive	0.0246817	0.543057	Sensitive	0.179712	0.560105
C2orf44	Resistant	0.560355	0.850978	Resistant	0.0246817	0.543057	Resistant	0.320794	0.560105
WDR6	Resistant	0.0448839	0.584284	Resistant	0.100024	0.543057	Resistant	0.988752	1
NAV3	Sensitive	0.315231	0.584284	Sensitive	0.315231	0.543057	Sensitive	0.0448835	0.560105
RFC1	Sensitive	0.56482	0.850978	Sensitive	0.0246817	0.543057	Sensitive	0.320084	0.560105
DNMT3B	Sensitive	0.318005	0.584284	Sensitive	0.0246817	0.543057	Sensitive	0.569302	0.82143
STAG1	Resistant	1	1	Resistant	0.181386	0.543057	Resistant	0.0246817	0.560105
ZBTB33	Sensitive	0.320084	0.584284	Sensitive	0.0448821	0.543057	Sensitive	0.31247	0.560105
MESDC1	Resistant	1	1	Resistant	0.100024	0.543057	Resistant	0.0448839	0.560105
SPATA5L1	Sensitive	0.56482	0.850978	Sensitive	0.178051	0.543057	Sensitive	0.0448839	0.560105
MRPS6	Sensitive	0.320084	0.584284	Sensitive	0.0448839	0.543057	Sensitive	0.315231	0.560105
IRF2BPL	Sensitive	0.0448839	0.584284	Sensitive	0.248261	0.543057	Sensitive	0.406868	0.702262
HSPA12A	Sensitive	0.569302	0.850978	Sensitive	0.0448839	0.543057	Sensitive	0.178051	0.560105
RHPN1	Resistant	0.320084	0.584284	Resistant	0.318005	0.543057	Resistant	0.0448839	0.560105
SSBP4	Sensitive	0.567058	0.850978	Sensitive	0.0448835	0.543057	Sensitive	0.17971	0.560105
IPO5	Sensitive	0.320084	0.584284	Resistant	0.320084	0.543057	Resistant	0.0448839	0.560105
RNF20	Sensitive	0.320794	0.584284	Sensitive	0.0448839	0.543057	Sensitive	0.320794	0.560105
VCL	Resistant	0.0448839	0.584284	Resistant	0.157893	0.543057	Resistant	0.658436	0.91874
ACTR6	Sensitive	0.0448839	0.584284	Sensitive	0.157893	0.543057	Resistant	0.665892	0.919474
ERCC6L	Resistant	0.307159	0.584284	Resistant	0.475067	0.776769	Resistant	0.0329616	0.560105
MYO1C	Sensitive	0.46754	0.822189	Sensitive	0.417583	0.688697	Sensitive	0.0246817	0.560105
ZNF516	Resistant	1	1	Resistant	0.0314843	0.543057	Resistant	0.154328	0.560105
ERBB2	Sensitive	0.997079	1	Sensitive	0.152565	0.543057	Sensitive	0.032464	0.560105
ERBB3	Sensitive	0.647316	0.953036	Sensitive	0.0448839	0.543057	Sensitive	0.174761	0.560105
TRIM11	Resistant	0.643626	0.953036	Resistant	0.0246817	0.543057	Resistant	0.320794	0.560105
RAB11FIP1	Sensitive	0.651014	0.953036	Sensitive	0.0448839	0.543057	Sensitive	0.174761	0.560105
FOCAD	Resistant	0.318005	0.584284	Resistant	0.0246815	0.543057	Resistant	0.651014	0.91874
WDR13	Sensitive	0.318005	0.584284	Sensitive	0.654721	0.898253	Sensitive	0.0246817	0.560105
GIGYF2	Sensitive	0.652866	0.953036	Sensitive	0.179712	0.543057	Sensitive	0.0448839	0.560105
BAI2	Sensitive	0.0246817	0.584284	Sensitive	0.320794	0.543057	Sensitive	0.665892	0.919474
AKAP13	Sensitive	0.994158	1	Resistant	0.0334694	0.543057	Resistant	0.158504	0.560105
UBA3	Resistant	0.66216	0.953538	Resistant	0.0448839	0.543057	Resistant	0.179712	0.560105
SPTY2D1	Resistant	0.181386	0.584284	Resistant	0.0448839	0.543057	Resistant	0.658436	0.91874
PLCB1	Resistant	0.0137105	0.584284	Resistant	0.409531	0.684957	Resistant	0.994376	1
MED13L	Sensitive	0.357901	0.650579	Sensitive	0.320121	0.543057	Sensitive	0.0495349	0.560105
TMEM185B	Resistant	0.656577	0.953036	Resistant	0.654719	0.898253	Resistant	0.0137105	0.560105
CHTF18	Sensitive	0.406867	0.732815	Sensitive	0.0246817	0.543057	Resistant	0.651014	0.91874
BRWD3	Resistant	0.476334	0.835653	Resistant	0.0335464	0.543057	Resistant	0.414876	0.708334
MCF2L	Sensitive	0.0448839	0.584284	Sensitive	0.157893	0.543057	Resistant	0.993132	1
APLP1	Sensitive	0.157893	0.584284	Resistant	0.99771	1	Resistant	0.0448839	0.560105
FGFR3	Sensitive	1	1	Sensitive	0.0448839	0.543057	Sensitive	0.157893	0.560105
ENTPD4	Resistant	1	1	Resistant	0.0448839	0.543057	Resistant	0.157893	0.560105
CCP110	Resistant	1	1	Resistant	0.157893	0.543057	Resistant	0.0448839	0.560105
PRSS23	Resistant	1	1	Resistant	0.0448839	0.543057	Resistant	0.157893	0.560105
ABCB9	Sensitive	0.0448839	0.584284	Sensitive	1	1	Sensitive	0.157893	0.560105
NOB1	Sensitive	1	1	Sensitive	0.157893	0.543057	Sensitive	0.0448839	0.560105
GOLGA8A	Sensitive	0.506383	0.850978	Sensitive	0.0310172	0.543057	Sensitive	0.46754	0.789775
DVL1	Resistant	0.0448839	0.584284	Resistant	0.262829	0.543057	Resistant	0.643626	0.91874
AASDH	Sensitive	0.0448835	0.584284	Sensitive	0.412202	0.685783	Sensitive	0.412202	0.7066
ZNF700	Sensitive	0.0448839	0.584284	Sensitive	0.255473	0.543057	Sensitive	0.665892	0.919474
SLC39A10	Resistant	0.993132	1	Resistant	0.0246817	0.543057	Resistant	0.312474	0.560105
CRYBG3	Sensitive	0.526498	0.850978	Sensitive	0.475076	0.776769	Sensitive	0.031017	0.560105
LAMC2	Sensitive	0.318005	0.584284	Resistant	0.992501	1	Resistant	0.0246817	0.560105
ABCC3	Sensitive	0.251849	0.584284	Sensitive	0.0314845	0.543057	Sensitive	0.988752	1
LPCAT4	Resistant	0.0246817	0.584284	Resistant	0.993132	1	Resistant	0.320084	0.560105
MANBA	Sensitive	0.318005	0.584284	Sensitive	0.0246817	0.543057	Sensitive	1	1
GFER	Sensitive	0.0448835	0.584284	Sensitive	0.560355	0.802606	Sensitive	0.312473	0.560105
CENPB	Sensitive	0.560355	0.850978	Sensitive	0.0448839	0.543057	Sensitive	0.312474	0.560105
KIAA1549L	Resistant	0.0448839	0.584284	Resistant	0.560355	0.802606	Resistant	0.312474	0.560105
USP1	Sensitive	0.414889	0.73761	Sensitive	0.423003	0.694411	Sensitive	0.0448839	0.560105
CCT7	Resistant	1	1	Resistant	0.1764	0.543057	Resistant	0.0448839	0.560105
EIF4ENIF1	Resistant	0.0448835	0.584284	Resistant	0.315231	0.543057	Resistant	0.560355	0.82143
UPF2	Sensitive	0.0448839	0.584284	Sensitive	0.420288	0.691397	Sensitive	0.420288	0.71313
RPS6KA4	Resistant	1	1	Resistant	0.0191324	0.543057	Resistant	0.414889	0.708334
ISYNA1	Resistant	1	1	Resistant	0.0448839	0.543057	Resistant	0.178051	0.560105
KIAA1244	Sensitive	0.179712	0.584284	Sensitive	0.0448839	0.543057	Resistant	0.993132	1
COL6A2	Resistant	0.560355	0.850978	Resistant	0.320084	0.543057	Resistant	0.0448839	0.560105
TARBP1	Sensitive	0.320084	0.584284	Sensitive	0.0448839	0.543057	Sensitive	0.560355	0.82143
BTBD11	Resistant	0.0448839	0.584284	Resistant	0.560355	0.802606	Resistant	0.320084	0.560105
PIM2	Sensitive	0.0448839	0.584284	Resistant	0.569302	0.802606	Resistant	0.315231	0.560105
TNFRSF1B	Resistant	0.318005	0.584284	Resistant	0.56482	0.802606	Resistant	0.0448839	0.560105
CXorf56	Sensitive	0.0448839	0.584284	Sensitive	0.318005	0.543057	Sensitive	0.56482	0.82143
ZNF598	Sensitive	0.56482	0.850978	Sensitive	0.318005	0.543057	Sensitive	0.0448839	0.560105
NEIL2	Resistant	0.0448839	0.584284	Resistant	0.56482	0.802606	Resistant	0.318005	0.560105
DCAF12	Resistant	0.560355	0.850978	Resistant	0.320794	0.543057	Resistant	0.0448839	0.560105
ANKFY1	Sensitive	0.56482	0.850978	Sensitive	0.320084	0.543057	Sensitive	0.0448839	0.560105
SPIRE2	Sensitive	0.320084	0.584284	Sensitive	0.0448839	0.543057	Sensitive	0.56482	0.82143
FZD4	Resistant	0.569302	0.850978	Resistant	0.0448839	0.543057	Resistant	0.318005	0.560105
SYNM	Sensitive	0.0448839	0.584284	Sensitive	0.56482	0.802606	Sensitive	0.320794	0.560105
PAXBP1	Resistant	0.0448839	0.584284	Resistant	0.56482	0.802606	Resistant	0.320794	0.560105
ACVR1	Resistant	0.0448839	0.584284	Resistant	0.320084	0.543057	Resistant	0.569302	0.82143
EPB41	Resistant	0.0448839	0.584284	Resistant	0.320084	0.543057	Resistant	0.569302	0.82143
GSTZ1	Sensitive	0.569302	0.850978	Sensitive	0.0448839	0.543057	Sensitive	0.320084	0.560105
POLL	Resistant	0.320084	0.584284	Resistant	0.569302	0.802606	Resistant	0.0448839	0.560105
SMTN	Sensitive	0.320794	0.584284	Sensitive	0.569302	0.802606	Resistant	0.0448839	0.560105
MYH9	Resistant	0.348836	0.634624	Resistant	0.0331314	0.543057	Resistant	0.717633	0.978768
SCAF8	Resistant	0.0448839	0.584284	Resistant	0.259133	0.543057	Resistant	0.717633	0.978768
SMAD6	Sensitive	0.560355	0.850978	Sensitive	0.0246817	0.543057	Sensitive	0.647316	0.91874
CHPF2	Sensitive	0.685335	0.981648	Sensitive	0.032796	0.543057	Sensitive	0.406867	0.702262
GLIPR2	Resistant	0.0448835	0.584284	Resistant	0.315231	0.543057	Resistant	0.651014	0.91874
NOC2L	Sensitive	0.56482	0.850978	Sensitive	0.66216	0.899101	Sensitive	0.0246817	0.560105
CACNA1H	Sensitive	0.0448839	0.584284	Resistant	0.658436	0.898253	Resistant	0.312474	0.560105
PGM2	Resistant	0.0448839	0.584284	Resistant	0.312474	0.543057	Resistant	0.66216	0.919474
SMYD3	Resistant	0.0448835	0.584284	Resistant	0.649158	0.898253	Resistant	0.320084	0.560105
MAML2	Sensitive	0.66216	0.953538	Sensitive	0.0448839	0.543057	Sensitive	0.318005	0.560105
EZH1	Resistant	0.0448839	0.584284	Resistant	0.320794	0.543057	Resistant	0.665892	0.919474
USP9X	Sensitive	0.412205	0.735689	Sensitive	0.0318082	0.543057	Resistant	0.754938	1
CEP97	Resistant	0.996251	1	Resistant	0.0246817	0.543057	Resistant	0.417583	0.709963
FHOD1	Sensitive	0.560355	0.850978	Resistant	0.0448839	0.543057	Resistant	0.412205	0.7066
FN1	Sensitive	0.0448839	0.584284	Sensitive	0.414889	0.687548	Sensitive	0.56482	0.82143
MAP3K11	Resistant	0.0448839	0.584284	Resistant	0.988752	1	Resistant	0.25005	0.560105
NXN	Sensitive	0.0448839	0.584284	Resistant	0.652866	0.898253	Resistant	0.417583	0.709963
MAP4	Sensitive	1	1	Resistant	0.560355	0.802606	Resistant	0.0246817	0.560105
MAN2B1	Resistant	1	1	Resistant	0.312474	0.543057	Resistant	0.0448839	0.560105
KIAA0232	Sensitive	1	1	Sensitive	0.312474	0.543057	Sensitive	0.0448839	0.560105
TBRG4	Sensitive	0.993132	1	Sensitive	0.0448839	0.543057	Sensitive	0.315231	0.560105
ZNF668	Resistant	0.560355	0.850978	Resistant	0.560355	0.802606	Resistant	0.0448839	0.560105
ELMO2	Sensitive	0.560355	0.850978	Sensitive	0.0448839	0.543057	Sensitive	0.560355	0.82143
FANCC	Sensitive	0.99771	1	Resistant	0.315231	0.543057	Resistant	0.0448839	0.560105
LLGL2	Resistant	0.0448839	0.584284	Resistant	0.315231	0.543057	Resistant	1	1
ALKBH1	Resistant	1	1	Resistant	0.315231	0.543057	Resistant	0.0448839	0.560105
RAB11FIP5	Resistant	0.0448839	0.584284	Resistant	0.99771	1	Resistant	0.318005	0.560105
HP1BP3	Resistant	0.99771	1	Resistant	0.318005	0.543057	Resistant	0.0448839	0.560105
NMRAL1	Sensitive	1	1	Sensitive	0.0448839	0.543057	Sensitive	0.318005	0.560105
EXOC6	Sensitive	0.56482	0.850978	Sensitive	0.0448839	0.543057	Sensitive	0.56482	0.82143
IQCC	Sensitive	0.0448839	0.584284	Sensitive	0.56482	0.802606	Sensitive	0.56482	0.82143
CDC23	Resistant	0.320084	0.584284	Resistant	0.0448839	0.543057	Resistant	1	1
SLC25A17	Resistant	0.0448839	0.584284	Resistant	0.320084	0.543057	Resistant	1	1
PPAP2C	Sensitive	0.0448839	0.584284	Sensitive	0.320794	0.543057	Resistant	1	1
VPS53	Sensitive	1	1	Sensitive	0.0448839	0.543057	Sensitive	0.320794	0.560105
ASPSCR1	Sensitive	1	1	Resistant	0.320794	0.543057	Resistant	0.0448839	0.560105
DDX60L	Resistant	0.569302	0.850978	Resistant	0.0448835	0.543057	Resistant	0.56482	0.82143
RIPK4	Resistant	0.0448839	0.584284	Resistant	0.56482	0.802606	Resistant	0.569302	0.82143
WRN	Sensitive	0.569302	0.850978	Sensitive	0.569302	0.802606	Sensitive	0.0448839	0.560105
COG1	Sensitive	0.569302	0.850978	Sensitive	0.0448839	0.543057	Sensitive	0.569302	0.82143
COX3	Resistant	0.560355	0.850978	Resistant	0.0448839	0.543057	Resistant	0.647316	0.91874
ARMC5	Sensitive	0.56482	0.850978	Sensitive	0.647316	0.898253	Sensitive	0.0448839	0.560105
SFSWAP	Sensitive	0.0321346	0.584284	Sensitive	0.717633	0.957423	Sensitive	0.714379	0.975176
TLN2	Resistant	0.032464	0.584284	Resistant	0.704649	0.945485	Resistant	0.724155	0.986931
XPC	Resistant	0.0448839	0.584284	Resistant	0.660297	0.899101	Resistant	0.560355	0.82143
FBXL3	Resistant	0.56482	0.850978	Resistant	0.0448839	0.543057	Resistant	0.658436	0.91874
CCAR1	Sensitive	0.0448839	0.584284	Resistant	0.654721	0.898253	Resistant	0.569302	0.82143
NAIF1	Sensitive	0.658436	0.953036	Sensitive	0.0448839	0.543057	Sensitive	0.569302	0.82143
HEG1	Sensitive	0.665892	0.954516	Resistant	0.0448839	0.543057	Resistant	0.569302	0.82143
MON2	Sensitive	0.0334694	0.584284	Resistant	0.691751	0.933868	Resistant	0.752011	1
PIK3R4	Sensitive	0.560355	0.850978	Resistant	0.99771	1	Resistant	0.0318082	0.560105
GPBP1	Sensitive	0.0448839	0.584284	Sensitive	0.71113	0.951284	Sensitive	0.569302	0.82143
PCSK1N	Sensitive	0.99771	1	Resistant	0.418934	0.690303	Resistant	0.0448839	0.560105
LIMCH1	Resistant	0.665892	0.954516	Resistant	0.647316	0.898253	Resistant	0.0448839	0.560105
FAM179B	Resistant	0.0448839	0.584284	Resistant	0.66216	0.899101	Resistant	0.66216	0.919474
PPP1R26	Resistant	0.748304	1	Resistant	0.0336999	0.543057	Resistant	0.80618	1
ZNF711	Sensitive	0.649158	0.953036	Resistant	0.99625	1	Resistant	0.0327926	0.560105
UHRF1BP1L	Sensitive	0.749088	1	Sensitive	0.0448839	0.543057	Sensitive	0.714379	0.975176
KIAA1468	Resistant	0.0246815	0.584284	Resistant	0.992501	1	Resistant	0.992501	1
PROS1	Resistant	0.0448839	0.584284	Resistant	1	1	Resistant	0.560355	0.82143
FBXO46	Resistant	1	1	Resistant	0.560355	0.802606	Resistant	0.0448839	0.560105
PPP2R1A	Resistant	0.0448839	0.584284	Resistant	0.99771	1	Resistant	0.56482	0.82143
FCHSD2	Sensitive	0.56482	0.850978	Sensitive	0.0448839	0.543057	Sensitive	1	1
MAT2B	Sensitive	0.56482	0.850978	Sensitive	0.0448839	0.543057	Sensitive	1	1
ULBP2	Resistant	0.0448839	0.584284	Resistant	0.56482	0.802606	Resistant	1	1
C16orf59	Sensitive	0.569302	0.850978	Resistant	0.993132	1	Resistant	0.0448839	0.560105
BAG3	Sensitive	1	1	Sensitive	0.0448839	0.543057	Sensitive	0.569302	0.82143
HEBP1	Sensitive	0.0448839	0.584284	Sensitive	1	1	Sensitive	0.569302	0.82143
CDH24	Sensitive	0.0448839	0.584284	Resistant	1	1	Resistant	0.569302	0.82143
LRRC8E	Sensitive	1	1	Sensitive	0.569302	0.802606	Sensitive	0.0448839	0.560105
HIRA	Sensitive	0.993132	1	Sensitive	0.654721	0.898253	Sensitive	0.0448839	0.560105
ACLY	Sensitive	1	1	Sensitive	0.0448835	0.543057	Sensitive	0.651014	0.91874
SKIV2L	Resistant	0.982091	1	Resistant	0.0448839	0.543057	Resistant	0.665892	0.919474
HDAC7	Sensitive	0.654721	0.953036	Resistant	1	1	Resistant	0.0448839	0.560105
RTTN	Resistant	0.988752	1	Resistant	0.691751	0.933868	Resistant	0.0448835	0.560105
FGFR2	Sensitive	0.993132	1	Sensitive	0.701416	0.942641	Resistant	0.0448839	0.560105
ZNF205	Resistant	0.0448839	0.584284	Resistant	1	1	Resistant	0.993132	1
TRIM26	Resistant	0.0448839	0.584284	Resistant	1	1	Resistant	0.99771	1
OSBPL6	Sensitive	1	1	Sensitive	0.99771	1	Sensitive	0.0448839	0.560105
ZNF12	Sensitive	1	1	Resistant	1	1	Resistant	0.0448839	0.560105

## Sheet: Table S3 RNAseq-Global
Genes	24hr correlation coefficient	24hr P-value for correlation	24hr adjusted P-value for correlation	48hr correlation coefficient	48hr P-value for correlation	48hr adjusted P-value for correlation	72hr correlation coefficient	72hr P-value for correlation	72hr adjusted P-value for correlation
REEP2	-0.279233	6.79018e-11	4.37968e-08	-0.285257	2.52236e-11	7.02175e-08	-0.269754	3.07465e-10	4.88102e-07
FAM171A2	-0.267847	4.13759e-10	1.40466e-07	-0.295739	4.25112e-12	4.2822e-08	-0.267421	4.41945e-10	5.1262e-07
SLC29A4	-0.289041	1.3376e-11	2.32725e-08	-0.265115	6.30405e-10	8.93704e-07	-0.270381	2.7873e-10	4.88102e-07
OGG1	-0.26054	1.26276e-09	2.47554e-07	-0.265381	6.0519e-10	8.93704e-07	-0.280859	5.2096e-11	1.81281e-07
PCDH1	0.299761	2.10495e-12	4.88313e-09	0.249106	6.76571e-09	3.76688e-06	0.246604	9.66225e-09	3.30247e-06
KIF1B	-0.27518	1.30439e-10	6.48421e-08	-0.255349	2.73321e-09	2.02207e-06	-0.266857	4.8221e-10	5.16299e-07
LAMB3	0.28395	3.13325e-11	3.65891e-08	0.210315	1.10916e-06	0.00010063	0.296994	3.4175e-12	3.89465e-08
MIR4260	0.281691	4.54601e-11	3.74143e-08	0.204367	2.24058e-06	0.000159115	0.294148	5.59617e-12	3.89465e-08
AVPI1	0.267516	4.35532e-10	1.40981e-07	0.25579	2.56147e-09	2.02207e-06	0.255626	2.62421e-09	1.40486e-06
C20orf96	-0.205402	1.9853e-06	5.53796e-05	-0.293597	6.15303e-12	4.2822e-08	-0.271981	2.16755e-10	4.88102e-07
NCR3LG1	-0.206104	1.82853e-06	5.21746e-05	-0.289936	1.14953e-11	5.33343e-08	-0.258264	1.77544e-09	1.12328e-06
P2RY2	0.313121	1.88259e-13	2.62038e-09	0.198716	4.288e-06	0.000240244	0.240567	2.24753e-08	5.18789e-06
RNF13	0.210114	1.13615e-06	3.71221e-05	0.286711	1.97881e-11	6.88576e-08	0.252556	4.1123e-09	1.90797e-06
PTK6	0.299791	2.09378e-12	4.88313e-09	0.181842	2.67396e-05	0.000754918	0.24797	7.95827e-09	2.99382e-06
ABHD17C	0.274027	1.56757e-10	7.27302e-08	0.230997	8.18566e-08	1.99888e-05	0.235144	4.70748e-08	8.50953e-06
HDGFRP2	-0.247243	8.82568e-09	1.06821e-06	-0.233451	5.90769e-08	1.58133e-05	-0.260324	1.30448e-09	9.07851e-07
MAGED4	-0.225157	1.75318e-07	8.80955e-06	-0.25206	4.41968e-09	3.07588e-06	-0.26364	7.8987e-10	7.32947e-07
TTC28	-0.302045	1.40518e-12	4.88313e-09	-0.200825	3.37272e-06	0.000209929	-0.222702	2.40035e-07	2.49332e-05
ZNF445	-0.201433	3.14552e-06	7.97495e-05	-0.274102	1.54917e-10	3.59382e-07	-0.25967	1.43892e-09	9.53732e-07
CD55	0.237738	3.31243e-08	2.72268e-06	0.261653	1.06783e-09	1.35119e-06	0.236028	4.17814e-08	7.85886e-06
MEX3B	-0.285883	2.27232e-11	3.16285e-08	-0.193865	7.37765e-06	0.000318592	-0.246401	9.94424e-09	3.30247e-06
NISCH	-0.195038	6.47888e-06	0.000141126	-0.270261	2.84016e-10	5.64745e-07	-0.270257	2.84194e-10	4.88102e-07
MAGED4B	-0.221456	2.81133e-07	1.29573e-05	-0.248752	7.11687e-09	3.80999e-06	-0.26165	1.06822e-09	8.14038e-07
S100A11	0.249444	6.44597e-09	8.46428e-07	0.239035	2.77454e-08	9.78491e-06	0.24193	1.86106e-08	4.8541e-06
LYPD3	0.247718	8.2491e-09	1.0161e-06	0.223108	2.27938e-07	3.5648e-05	0.254411	3.13688e-09	1.61712e-06
CAMK1	-0.242447	1.73219e-08	1.67433e-06	-0.247443	8.57811e-09	4.42217e-06	-0.234517	5.12163e-08	9.13949e-06
FAM83A	0.253093	3.80324e-09	5.63162e-07	0.240972	2.12537e-08	8.2175e-06	0.226826	1.41326e-07	1.72555e-05
TACSTD2	0.277503	8.98459e-11	5.43722e-08	0.199792	3.79495e-06	0.000223821	0.2377	3.32986e-08	6.62119e-06
DTX2	0.268732	3.606e-10	1.35654e-07	0.196926	5.24695e-06	0.000263223	0.246882	9.28941e-09	3.30247e-06
PYCARD	0.237997	3.19757e-08	2.70887e-06	0.245248	1.17026e-08	5.25018e-06	0.235407	4.54328e-08	8.32077e-06
ICA1L	-0.208746	1.33777e-06	4.13786e-05	-0.219562	3.56845e-07	4.84632e-05	-0.288837	1.38433e-11	6.42284e-08
GALNT3	0.299937	2.04073e-12	4.88313e-09	0.184469	2.03207e-05	0.000613077	0.214459	6.71364e-07	4.69584e-05
MEX3A	-0.21226	8.77433e-07	3.04563e-05	-0.264996	6.42075e-10	8.93704e-07	-0.240434	2.28904e-08	5.18789e-06
ANO1	0.261235	1.13736e-09	2.34252e-07	0.228007	1.21207e-07	2.44505e-05	0.22022	3.28548e-07	2.95323e-05
TNS4	0.276462	1.06224e-10	5.47605e-08	0.185044	1.91264e-05	0.000592919	0.239691	2.53575e-08	5.43002e-06
C16orf74	0.252897	3.91306e-09	5.73325e-07	0.207693	1.5159e-06	0.000122673	0.249627	6.27842e-09	2.64816e-06
HNRNPA1P33	0.257929	1.86616e-09	3.16769e-07	0.204628	2.17344e-06	0.00015698	0.24445	1.30928e-08	3.79664e-06
ALS2CL	0.300558	1.82876e-12	4.88313e-09	0.172661	6.76972e-05	0.00138503	0.220517	3.16484e-07	2.92637e-05
STARD9	-0.263775	7.73753e-10	1.86837e-07	-0.2129	8.11911e-07	8.21955e-05	-0.22625	1.52273e-07	1.79854e-05
DBN1	-0.272053	2.14311e-10	8.85288e-08	-0.217518	4.6049e-07	5.88033e-05	-0.20945	1.23017e-06	6.99116e-05
ZMYM4	-0.219849	3.44204e-07	1.53067e-05	-0.23476	4.95653e-08	1.43729e-05	-0.253207	3.74074e-09	1.79543e-06
ADAM8	0.251937	4.49896e-09	6.3899e-07	0.193937	7.31917e-06	0.000318592	0.250011	5.94121e-09	2.58424e-06
WASF1	-0.23768	3.33887e-08	2.72268e-06	-0.237525	3.41018e-08	1.07173e-05	-0.224901	1.812e-07	2.00168e-05
BCORL1	-0.227499	1.295e-07	7.3273e-06	-0.24481	1.24474e-08	5.25018e-06	-0.227918	1.22624e-07	1.6102e-05
TNFRSF21	0.265257	6.16817e-10	1.65105e-07	0.174869	5.43727e-05	0.0012032	0.246197	1.02358e-08	3.31329e-06
ANO1-AS1	0.261848	1.03668e-09	2.26127e-07	0.215945	5.59414e-07	6.62092e-05	0.213819	7.25957e-07	4.97368e-05
GNA15	0.226404	1.4926e-07	7.93648e-06	0.201573	3.09544e-06	0.00019855	0.266371	5.19725e-10	5.16718e-07
GPR162	-0.24494	1.22221e-08	1.33952e-06	-0.221967	2.63514e-07	3.90196e-05	-0.227995	1.21399e-07	1.60929e-05
AMPD2	-0.241132	2.07868e-08	1.92888e-06	-0.205357	1.99596e-06	0.000150633	-0.248292	7.60099e-09	2.93884e-06
SLC37A2	0.205153	2.04402e-06	5.645e-05	0.224505	1.90638e-07	3.23597e-05	0.26833	3.83879e-10	4.88102e-07
ESRP1	0.276975	9.78243e-11	5.43722e-08	0.199913	3.74293e-06	0.000221693	0.20764	1.52561e-06	7.98308e-05
MST1R	0.295528	4.40932e-12	8.76761e-09	0.165152	0.000139816	0.00231955	0.211936	9.12466e-07	5.72399e-05
CCDC92	-0.230327	8.94237e-08	5.38826e-06	-0.203259	2.54847e-06	0.000172111	-0.256712	2.23532e-09	1.34422e-06
KIF5A	-0.225729	1.62864e-07	8.36126e-06	-0.238937	2.81196e-08	9.78491e-06	-0.228021	1.20987e-07	1.60929e-05
ALDH1A3	0.187888	1.41365e-05	0.000256875	0.249362	6.52167e-09	3.76688e-06	0.255635	2.62073e-09	1.40486e-06
PLSCR1	0.245188	1.18019e-08	1.31416e-06	0.237408	3.4649e-08	1.07173e-05	0.201758	3.03023e-06	0.000120508
DENND5A	-0.281983	4.33333e-11	3.74143e-08	-0.182043	2.61864e-05	0.000743853	-0.210967	1.02557e-06	6.17964e-05
SOX12	-0.235356	4.57469e-08	3.32677e-06	-0.205331	2.00209e-06	0.000150633	-0.244649	1.2731e-08	3.77027e-06
PLCG1	-0.258019	1.84126e-09	3.16401e-07	-0.211459	9.66564e-07	9.09028e-05	-0.210227	1.12094e-06	6.65107e-05
C11orf95	-0.255395	2.71511e-09	4.19907e-07	-0.226998	1.38208e-07	2.61123e-05	-0.196105	5.75215e-06	0.000187944
CTXN1	-0.219248	3.71148e-07	1.60435e-05	-0.226964	1.38825e-07	2.61123e-05	-0.241189	2.06234e-08	5.0672e-06
KCNN4	0.23264	6.58227e-08	4.22206e-06	0.231613	7.54507e-08	1.90945e-05	0.220774	3.06408e-07	2.86235e-05
RBBP4	-0.157212	0.000291192	0.00270477	-0.255667	2.60819e-09	2.02207e-06	-0.269097	3.40658e-10	4.88102e-07
KLF4	0.22129	2.87085e-07	1.31879e-05	0.246913	9.24879e-09	4.4391e-06	0.213964	7.13196e-07	4.91434e-05
STK25	-0.208008	1.46038e-06	4.41893e-05	-0.235703	4.36544e-08	1.29282e-05	-0.240846	2.16243e-08	5.18789e-06
MBP	0.261471	1.09753e-09	2.34252e-07	0.208482	1.38053e-06	0.000115562	0.202645	2.73579e-06	0.000112746
WDR6	-0.186154	1.70074e-05	0.000295076	-0.257974	1.85368e-09	2.00539e-06	-0.239745	2.51694e-08	5.43002e-06
MUM1	-0.226895	1.40058e-07	7.63774e-06	-0.24232	1.76303e-08	7.01134e-06	-0.209655	1.20033e-06	6.91466e-05
GJB3	0.265848	5.63328e-10	1.63353e-07	0.189887	1.13993e-05	0.000409673	0.212017	9.03564e-07	5.72399e-05
ZC3HC1	-0.244004	1.39382e-08	1.48096e-06	-0.229903	9.45563e-08	2.08909e-05	-0.201438	3.14374e-06	0.00012396
C4orf46	-0.250234	5.75415e-09	7.92991e-07	-0.221566	2.77242e-07	4.01972e-05	-0.20034	3.56511e-06	0.000134479
GLIPR2	-0.259502	1.47573e-09	2.73875e-07	-0.203262	2.54744e-06	0.000172111	-0.205746	1.90701e-06	9.18466e-05
COL17A1	0.24814	7.76785e-09	9.82916e-07	0.192222	8.83925e-06	0.000351524	0.229464	1.00168e-07	1.39424e-05
ZFHX4	-0.248434	7.44859e-09	9.59257e-07	-0.191025	1.00747e-05	0.000376713	-0.22998	9.36042e-08	1.37145e-05
C6orf132	0.279114	6.92241e-11	4.37968e-08	0.159886	0.000228303	0.0032426	0.218128	4.2684e-07	3.53642e-05
ZCCHC11	-0.197402	4.97385e-06	0.000113123	-0.209028	1.29373e-06	0.000110475	-0.268298	3.85741e-10	4.88102e-07
KRT15	0.252198	4.33185e-09	6.28074e-07	0.181153	2.87143e-05	0.000783675	0.231577	7.58047e-08	1.2561e-05
MAPK8IP1	-0.22745	1.3032e-07	7.34379e-06	-0.22395	2.04692e-07	3.31291e-05	-0.222164	2.57023e-07	2.55536e-05
ALMS1	-0.180102	3.19989e-05	0.000482429	-0.246444	9.88452e-09	4.58609e-06	-0.248829	7.03918e-09	2.85568e-06
CDA	0.226285	1.51575e-07	8.02194e-06	0.201359	3.17258e-06	0.00020164	0.243989	1.39659e-08	3.96718e-06
ZBED3	-0.219819	3.45501e-07	1.53154e-05	-0.215917	5.61296e-07	6.62092e-05	-0.238205	3.10826e-08	6.36234e-06
GJB5	0.265863	5.61994e-10	1.63353e-07	0.196028	5.80178e-06	0.000280399	0.198955	4.17324e-06	0.000150097
ITGB4	0.287885	1.62514e-11	2.51337e-08	0.172772	6.69585e-05	0.0013782	0.194655	6.76015e-06	0.000208635
TTC3-AS1	-0.19941	3.96313e-06	9.51082e-05	-0.256986	2.14638e-09	2.00539e-06	-0.216591	5.16516e-07	3.98056e-05
PHTF1	-0.212382	8.64547e-07	3.00992e-05	-0.191666	9.39372e-06	0.000360196	-0.262875	8.87369e-10	7.71955e-07
FXYD3	0.263735	7.78543e-10	1.86837e-07	0.200315	3.57511e-06	0.000215225	0.193945	7.31297e-06	0.000219373
TTC3	-0.196115	5.74582e-06	0.000127148	-0.257074	2.11854e-09	2.00539e-06	-0.217846	4.42075e-07	3.56932e-05
ACTR8	-0.197514	4.9115e-06	0.000112255	-0.23265	6.57355e-08	1.69439e-05	-0.240224	2.35649e-08	5.20634e-06
ITGA6	0.209434	1.23249e-06	3.89886e-05	0.226125	1.54749e-07	2.79734e-05	0.234086	5.42597e-08	9.56001e-06
GPRC5A	0.257168	2.08942e-09	3.46222e-07	0.182571	2.47884e-05	0.000712871	0.215731	5.74306e-07	4.23921e-05
GPR110	0.245079	1.19846e-08	1.32392e-06	0.18996	1.13094e-05	0.000408872	0.22532	1.71674e-07	1.94271e-05
RND2	-0.233904	5.56029e-08	3.87865e-06	-0.222089	2.59478e-07	3.88353e-05	-0.208514	1.37533e-06	7.50716e-05
FGFR1	-0.268125	3.96242e-10	1.38399e-07	-0.19384	7.39811e-06	0.000318592	-0.190765	1.03638e-05	0.000273209
KRT16	0.247131	8.96687e-09	1.07595e-06	0.206154	1.81786e-06	0.00014215	0.207727	1.50982e-06	7.96029e-05
CAND2	-0.212205	8.83292e-07	3.05075e-05	-0.210359	1.10332e-06	0.00010063	-0.242371	1.75049e-08	4.6856e-06
PRSS22	0.272421	2.02199e-10	8.79504e-08	0.154511	0.000370832	0.00448671	0.216925	4.95599e-07	3.89851e-05
FSD1	-0.248808	7.05993e-09	9.18385e-07	-0.195791	5.9577e-06	0.00028399	-0.211261	9.89888e-07	6.09657e-05
PVRL4	0.265625	5.83e-10	1.65105e-07	0.185741	1.77678e-05	0.000563347	0.196995	5.20617e-06	0.000174049
TYMP	0.255118	2.82797e-09	4.32556e-07	0.19248	8.59273e-06	0.000346455	0.202199	2.8805e-06	0.000117922
IP6K2	-0.156837	0.000301185	0.00277813	-0.255283	2.76021e-09	2.02207e-06	-0.247381	8.65427e-09	3.16997e-06
FGFBP1	0.255864	2.53371e-09	3.98699e-07	0.175128	5.29832e-05	0.00118185	0.216632	5.13919e-07	3.98056e-05
HLA-E	0.20871	1.3436e-06	4.14547e-05	0.224043	2.02261e-07	3.31291e-05	0.230043	9.28303e-08	1.37145e-05
TRO	-0.243538	1.48758e-08	1.50041e-06	-0.179823	3.29311e-05	0.00086665	-0.228629	1.11757e-07	1.52505e-05
C1orf116	0.256445	2.32534e-09	3.76353e-07	0.168037	0.000106204	0.00189762	0.22015	3.31444e-07	2.95729e-05
PHC1P1	-0.241466	1.98494e-08	1.86678e-06	-0.209054	1.28967e-06	0.000110475	-0.202639	2.73785e-06	0.000112746
TOP2B	-0.169346	9.36e-05	0.00111162	-0.237765	3.30024e-08	1.06828e-05	-0.252031	4.43805e-09	1.99268e-06
AREGB	0.248374	7.51197e-09	9.59257e-07	0.173374	6.30934e-05	0.00132259	0.225678	1.63949e-07	1.90167e-05
SCNN1A	0.266882	4.80351e-10	1.48342e-07	0.171593	7.51969e-05	0.0014834	0.201165	3.24381e-06	0.000126472
B3GNT3	0.276816	1.00349e-10	5.43722e-08	0.145726	0.000792682	0.00739005	0.209504	1.22228e-06	6.99116e-05
PSIP1	-0.21821	4.22497e-07	1.78276e-05	-0.194565	6.82792e-06	0.000308564	-0.240365	2.31086e-08	5.18789e-06
PTAFR	0.233586	5.80176e-08	3.95856e-06	0.182791	2.42264e-05	0.000701055	0.232086	7.08558e-08	1.18824e-05
SMAD9	-0.236642	3.84475e-08	2.97306e-06	-0.178372	3.8195e-05	0.000949349	-0.229546	9.90946e-08	1.39424e-05
VAMP8	0.283909	3.15446e-11	3.65891e-08	0.164082	0.000154647	0.00248848	0.184168	2.09739e-05	0.000447068
MYEOV	0.230756	8.4502e-08	5.18143e-06	0.170982	7.98311e-05	0.00154505	0.237846	3.26406e-08	6.58442e-06
IP6K1	-0.202727	2.71026e-06	7.13122e-05	-0.200611	3.4564e-06	0.000211937	-0.245381	1.14853e-08	3.63051e-06
MAPK7	-0.260899	1.19633e-09	2.4133e-07	-0.171059	7.92334e-05	0.00154029	-0.198965	4.16892e-06	0.000150097
GPR87	0.229781	9.60888e-08	5.69132e-06	0.205132	2.04904e-06	0.000151705	0.209994	1.1526e-06	6.7126e-05
B3GALT4	0.260734	1.22653e-09	2.43887e-07	0.182634	2.46251e-05	0.000711114	0.187653	1.44962e-05	0.000345477
ATXN7L2	-0.213014	8.0076e-07	2.82888e-05	-0.222456	2.47661e-07	3.74696e-05	-0.212299	8.73223e-07	5.67962e-05
PRR3	-0.217123	4.83603e-07	1.96821e-05	-0.211591	9.51322e-07	9.00863e-05	-0.218584	4.03287e-07	3.40203e-05
CLDN7	0.280667	5.37601e-11	3.74143e-08	0.14993	0.000553905	0.00581746	0.190523	1.06397e-05	0.000278088
KIAA1211	-0.188751	1.28856e-05	0.0002401	-0.194441	6.9222e-06	0.000310807	-0.261389	1.11119e-09	8.14038e-07
GPR137C	-0.203413	2.50335e-06	6.62591e-05	-0.219473	3.60835e-07	4.84632e-05	-0.225494	1.67883e-07	1.93121e-05
MAP1A	-0.281642	4.58259e-11	3.74143e-08	-0.150989	0.000505348	0.00547388	-0.189263	1.21944e-05	0.000305276
MIR205HG	0.237624	3.36447e-08	2.72268e-06	0.198142	4.57581e-06	0.000250751	0.204993	2.08267e-06	9.60112e-05
SETD2	-0.176246	4.73629e-05	0.000652717	-0.230393	8.86453e-08	2.08909e-05	-0.241821	1.88962e-08	4.8541e-06
TMSB15B	-0.233707	5.70889e-08	3.91438e-06	-0.179591	3.37224e-05	0.000874921	-0.224583	1.8874e-07	2.06856e-05
ITGA2	0.215899	5.62586e-07	2.20581e-05	0.187906	1.41089e-05	0.000474351	0.237402	3.46774e-08	6.79824e-06
LCN2	0.251184	5.01686e-09	6.98296e-07	0.171931	7.27414e-05	0.00145682	0.208002	1.46154e-06	7.76458e-05
WDR82	-0.204959	2.09089e-06	5.72498e-05	-0.221781	2.69808e-07	3.95311e-05	-0.217901	4.39066e-07	3.56932e-05
LIPH	0.235525	4.4716e-08	3.29314e-06	0.193355	7.80475e-06	0.000326229	0.207343	1.58008e-06	8.14563e-05
SALL2	-0.186324	1.67029e-05	0.000291797	-0.213175	7.85238e-07	8.03656e-05	-0.244755	1.25433e-08	3.77027e-06
CCDC28B	-0.240719	2.20096e-08	2.0023e-06	-0.175769	4.96897e-05	0.00113942	-0.216485	5.23344e-07	3.98056e-05
KRT7	0.235645	4.40002e-08	3.25765e-06	0.16193	0.000189081	0.0028669	0.233812	5.62872e-08	9.79328e-06
ZNF428	-0.219951	3.39849e-07	1.51614e-05	-0.197823	4.74317e-06	0.000251427	-0.221641	2.74606e-07	2.634e-05
BBS7	-0.237813	3.27871e-08	2.72268e-06	-0.190299	1.09012e-05	0.000400352	-0.205107	2.05511e-06	9.53501e-05
SCEL	0.218332	4.16127e-07	1.77354e-05	0.177035	4.37394e-05	0.00104967	0.23934	2.661e-08	5.61189e-06
MYH10	-0.224809	1.83336e-07	9.11378e-06	-0.19123	9.85195e-06	0.000371624	-0.219587	3.55709e-07	3.11391e-05
CLIP4	0.226899	1.39986e-07	7.63774e-06	0.202166	2.89114e-06	0.000189629	0.208638	1.35509e-06	7.46306e-05
TSPAN1	0.26701	4.70982e-10	1.48342e-07	0.15762	0.000280645	0.00370968	0.195264	6.31792e-06	0.00019809
MKRN2	-0.202559	2.76308e-06	7.23071e-05	-0.188219	1.3643e-05	0.000464295	-0.246386	9.96506e-09	3.30247e-06
WDR19	-0.233043	6.23813e-08	4.12241e-06	-0.197934	4.68437e-06	0.000251427	-0.202765	2.69825e-06	0.00011211
RHOD	0.249798	6.12628e-09	8.12111e-07	0.160062	0.000224651	0.0032071	0.214579	6.61586e-07	4.66823e-05
KIAA0040	0.244409	1.31673e-08	1.42074e-06	0.201475	3.13048e-06	0.000199877	0.184358	2.05601e-05	0.000440948
CDH1	0.281298	4.84837e-11	3.74143e-08	0.141578	0.00111864	0.00945373	0.186525	1.63495e-05	0.00037429
SETMAR	-0.207026	1.64044e-06	4.807e-05	-0.213482	7.56398e-07	7.8191e-05	-0.217879	4.40278e-07	3.56932e-05
GRHL2	0.271996	2.1625e-10	8.85288e-08	0.159333	0.000240162	0.0033649	0.18367	2.21007e-05	0.000461199
SCMH1	-0.223847	2.07398e-07	9.95437e-06	-0.197781	4.76565e-06	0.000251427	-0.211529	9.58403e-07	5.95374e-05
ZMYM4-AS1	-0.187355	1.49662e-05	0.000267756	-0.2301	9.21405e-08	2.08909e-05	-0.220407	3.20916e-07	2.9387e-05
STEAP4	0.243807	1.43272e-08	1.48195e-06	0.179786	3.30561e-05	0.000867388	0.200654	3.43953e-06	0.000131164
PBRM1	-0.187866	1.417e-05	0.000257148	-0.228727	1.10323e-07	2.29193e-05	-0.220493	3.17467e-07	2.92637e-05
AP4M1	-0.205402	1.98537e-06	5.53796e-05	-0.222936	2.32994e-07	3.57034e-05	-0.206497	1.74591e-06	8.83686e-05
PERP	0.247929	8.00415e-09	1.00277e-06	0.1678	0.000108649	0.0019314	0.205926	1.86723e-06	9.1048e-05
PARP9	0.212378	8.64983e-07	3.00992e-05	0.249192	6.6827e-09	3.76688e-06	0.166569	0.000122219	0.00155654
AREG	0.243076	1.58683e-08	1.57765e-06	0.16255	0.000178479	0.00275762	0.215848	5.66082e-07	4.21353e-05
AGO1	-0.165149	0.000139857	0.0015354	-0.226707	1.43516e-07	2.66346e-05	-0.242691	1.67426e-08	4.56942e-06
EHF	0.263791	7.71843e-10	1.86837e-07	0.166979	0.000117533	0.00204911	0.182449	2.51033e-05	0.000505663
PLEKHO1	-0.267602	4.29768e-10	1.40981e-07	-0.175802	4.95248e-05	0.00113752	-0.169495	9.22612e-05	0.00126645
ORAI2	-0.263754	7.76219e-10	1.86837e-07	-0.17181	7.36103e-05	0.00146788	-0.176967	4.40442e-05	0.000756853
MYL6B	-0.23681	3.75796e-08	2.9386e-06	-0.200733	3.40858e-06	0.000209929	-0.187891	1.41313e-05	0.000339126
SMARCC1	-0.140287	0.00124297	0.00823852	-0.25694	2.16114e-09	2.00539e-06	-0.2313	7.86361e-08	1.27736e-05
FAM25C	0.18871	1.29425e-05	0.000240517	0.212343	8.68669e-07	8.58958e-05	0.233011	6.26465e-08	1.06339e-05
PTGES	0.246657	9.59091e-09	1.11247e-06	0.16582	0.000131249	0.00221608	0.206251	1.79708e-06	8.96543e-05
PRKCH	0.225765	1.62111e-07	8.35714e-06	0.192087	8.97147e-06	0.00035259	0.208306	1.40976e-06	7.63518e-05
KCTD17	-0.264854	6.56117e-10	1.72311e-07	-0.188275	1.35625e-05	0.000462688	-0.156952	0.000298089	0.00294054
SAMD9	0.174046	5.90225e-05	0.000781322	0.232902	6.35704e-08	1.6695e-05	0.22598	1.57666e-07	1.84417e-05
SGCB	-0.283013	3.65771e-11	3.74143e-08	-0.142707	0.00101943	0.00882975	-0.1775	4.17303e-05	0.000731542
AGO3	-0.172392	6.95158e-05	0.00088933	-0.231094	8.08199e-08	1.99888e-05	-0.230346	8.92014e-08	1.37145e-05
MICU3	-0.215463	5.93615e-07	2.29515e-05	-0.192012	9.0458e-06	0.000352685	-0.219831	3.45013e-07	3.05875e-05
CCAR2	-0.168634	0.000100263	0.0011757	-0.249882	6.05246e-09	3.76688e-06	-0.211951	9.10865e-07	5.72399e-05
PHC1	-0.226704	1.43586e-07	7.7165e-06	-0.203878	2.37169e-06	0.000165887	-0.194766	6.67702e-06	0.000206528
RNF223	0.268486	3.74667e-10	1.37237e-07	0.156434	0.000312313	0.00399181	0.183023	2.36455e-05	0.00048543
CLTCL1	-0.217306	4.72777e-07	1.93547e-05	-0.193553	7.63628e-06	0.000322568	-0.214982	6.29714e-07	4.50415e-05
PIAS2	-0.213483	7.56274e-07	2.69765e-05	-0.193322	7.83382e-06	0.000326464	-0.218813	3.91903e-07	3.32615e-05
KRT19	0.268101	3.97726e-10	1.38399e-07	0.145141	0.000832612	0.0076562	0.190175	1.10482e-05	0.000283302
ACSL3	0.190889	1.0224e-05	0.000201569	0.229598	9.84298e-08	2.11151e-05	0.208613	1.35911e-06	7.46306e-05
PLEKHG2	-0.230222	9.06674e-08	5.43965e-06	-0.208568	1.3664e-06	0.000115562	-0.18245	2.51018e-05	0.000505663
CD74	0.20206	2.92693e-06	7.54037e-05	0.209792	1.18087e-06	0.000106042	0.216512	5.2158e-07	3.98056e-05
ELF3	0.265271	6.15561e-10	1.65105e-07	0.149229	0.000588414	0.00603992	0.187758	1.43342e-05	0.000342225
HLA-DMA	0.152651	0.000437063	0.00367018	0.2437	1.45439e-08	5.95402e-06	0.228199	1.18214e-07	1.59749e-05
S100A14	0.261194	1.14441e-09	2.34252e-07	0.154478	0.000371932	0.00449141	0.188155	1.37375e-05	0.000332987
MAL2	0.26675	4.90246e-10	1.48342e-07	0.147121	0.000704511	0.00679562	0.187301	1.50527e-05	0.000353318
S100A16	0.200858	3.35998e-06	8.40689e-05	0.193357	7.80279e-06	0.000326229	0.231044	8.13483e-08	1.30148e-05
MUC4	0.231387	7.77361e-08	4.87391e-06	0.17448	5.65272e-05	0.00123906	0.211495	9.6242e-07	5.95374e-05
TAOK3	0.190194	1.10257e-05	0.00021197	0.224624	1.87755e-07	3.23597e-05	0.212544	8.47756e-07	5.55486e-05
PKP3	0.261829	1.03974e-09	2.26127e-07	0.14082	0.00119021	0.0098552	0.196981	5.21433e-06	0.000174049
PNMA6C	-0.154117	0.000384041	0.00333981	-0.247007	9.12599e-09	4.4391e-06	-0.221391	2.8344e-07	2.68381e-05
MAST3	-0.169503	9.21884e-05	0.00110049	-0.227142	1.35636e-07	2.61123e-05	-0.229474	1.00045e-07	1.39424e-05
SERPINB5	0.249807	6.11872e-09	8.12111e-07	0.160867	0.000208611	0.00305006	0.197483	4.9287e-06	0.000168972
UBTD2	-0.216445	5.25949e-07	2.09884e-05	-0.192296	8.76805e-06	0.000350697	-0.212238	8.797e-07	5.69514e-05
NBPF1	-0.18167	2.72185e-05	0.000422357	-0.24004	2.41685e-08	9.09193e-06	-0.203116	2.59081e-06	0.000109609
LINC00094	-0.223987	2.0373e-07	9.84624e-06	-0.20924	1.26137e-06	0.00010905	-0.185181	1.88531e-05	0.000415788
RAF1	-0.180454	3.08609e-05	0.000467922	-0.197039	5.18088e-06	0.000263188	-0.245227	1.17374e-08	3.63051e-06
TUBA1A	-0.276741	1.01564e-10	5.43722e-08	-0.141641	0.00111287	0.00942233	-0.174708	5.52568e-05	0.000891217
PDHB	-0.180217	3.16249e-05	0.000477426	-0.192737	8.35395e-06	0.000340993	-0.24869	7.18075e-09	2.85568e-06
CNTNAP1	-0.273762	1.63515e-10	7.34183e-08	-0.16254	0.000178657	0.00275762	-0.160156	0.000222725	0.00238231
APLP1	-0.226398	1.4939e-07	7.93648e-06	-0.188735	1.29076e-05	0.00044897	-0.20017	3.63502e-06	0.000136745
IRF6	0.259632	1.44726e-09	2.73875e-07	0.155611	0.000336221	0.004208	0.184469	2.03219e-05	0.000436514
COL3A1	-0.230601	8.62545e-08	5.24269e-06	-0.19503	6.48429e-06	0.000298857	-0.187811	1.4253e-05	0.000341459
ZYG11B	-0.205701	1.91707e-06	5.42352e-05	-0.174042	5.90416e-05	0.00127807	-0.236203	4.08025e-08	7.83537e-06
FAM171A1	-0.213513	7.53582e-07	2.69643e-05	-0.214405	6.75841e-07	7.52562e-05	-0.19103	1.00682e-05	0.000268741
SFN	0.253998	3.33249e-09	5.04183e-07	0.153351	0.000410949	0.00479467	0.192959	8.15238e-06	0.000233824
ARL14	0.23889	2.83002e-08	2.41663e-06	0.156017	0.000324223	0.00410024	0.211976	9.08042e-07	5.72399e-05
GPC2	-0.211234	9.93195e-07	3.3473e-05	-0.198974	4.16443e-06	0.000237139	-0.208031	1.45652e-06	7.76458e-05
MPZL2	0.265295	6.13288e-10	1.65105e-07	0.130684	0.00264867	0.0171408	0.19377	7.4554e-06	0.000220948
UNC13B	-0.1856	1.80355e-05	0.000306515	-0.229584	9.86049e-08	2.11151e-05	-0.204805	2.12888e-06	9.74734e-05
WDR48	-0.205273	2.01565e-06	5.58881e-05	-0.19305	8.07157e-06	0.000333377	-0.218271	4.1933e-07	3.51606e-05
LITAF	0.189183	1.22993e-05	0.00023211	0.208478	1.3811e-06	0.000115562	0.222426	2.48609e-07	2.55536e-05
SMARCD3	-0.209386	1.2395e-06	3.9113e-05	-0.210289	1.11254e-06	0.00010063	-0.196696	5.38399e-06	0.000178428
DAPP1	0.233468	5.89408e-08	3.98251e-06	0.183704	2.20207e-05	0.000648999	0.190803	1.03211e-05	0.000272769
HLA-V	0.200828	3.37148e-06	8.40996e-05	0.188416	1.33586e-05	0.000459108	0.225401	1.69903e-07	1.93842e-05
ELMO3	0.263908	7.58268e-10	1.86837e-07	0.155602	0.000336483	0.004208	0.173179	6.43196e-05	0.000996302
GDF11	-0.236313	4.01961e-08	3.08435e-06	-0.173645	6.14166e-05	0.00130317	-0.195214	6.35334e-06	0.00019809
LTBR	0.206993	1.64673e-06	4.81212e-05	0.188662	1.30093e-05	0.000450438	0.217432	4.65419e-07	3.72309e-05
SH2D3A	0.255822	2.54933e-09	3.98699e-07	0.144975	0.000844268	0.00774445	0.191387	9.6846e-06	0.000262257
MEX3D	-0.207928	1.47431e-06	4.44175e-05	-0.224807	1.83384e-07	3.23103e-05	-0.181046	2.90336e-05	0.000566786
PEAK1	-0.215197	6.13285e-07	2.33233e-05	-0.17139	7.6705e-05	0.00149594	-0.221593	2.76287e-07	2.634e-05
HS2ST1	-0.17015	8.65751e-05	0.00105544	-0.222921	2.33423e-07	3.57034e-05	-0.222754	2.38446e-07	2.49332e-05
MFI2	0.166712	0.000120562	0.00136654	0.207552	1.54146e-06	0.000124021	0.238756	2.88247e-08	5.98823e-06
SCML2	-0.190794	1.03302e-05	0.000202802	-0.210467	1.08909e-06	0.00010063	-0.213756	7.31562e-07	4.97368e-05
LRWD1	-0.18847	1.32813e-05	0.000245501	-0.213562	7.49103e-07	7.8191e-05	-0.212888	8.13047e-07	5.42523e-05
SLMO1	-0.219122	3.77039e-07	1.62477e-05	-0.180253	3.15075e-05	0.000838534	-0.208138	1.43809e-06	7.7311e-05
ST14	0.269313	3.29417e-10	1.27365e-07	0.134687	0.00194355	0.0138233	0.179968	3.2443e-05	0.000616063
PFAS	-0.184599	2.00458e-05	0.000331768	-0.23055	8.68374e-08	2.08395e-05	-0.198098	4.59848e-06	0.000160417
ZNF852	-0.148651	0.000618345	0.00480824	-0.237137	3.59502e-08	1.08781e-05	-0.224202	1.98189e-07	2.13454e-05
GTF2H2C	-0.204826	2.12382e-06	5.78503e-05	-0.200505	3.49844e-06	0.000212641	-0.205921	1.86817e-06	9.1048e-05
TMSB15A	-0.234207	5.33891e-08	3.7722e-06	-0.160431	0.000217167	0.00313042	-0.205108	2.05482e-06	9.53501e-05
KDM4A	-0.164931	0.00014277	0.00155674	-0.219369	3.65589e-07	4.84632e-05	-0.227487	1.29701e-07	1.65625e-05
S100P	0.258634	1.68003e-09	2.99799e-07	0.149092	0.000595371	0.00607957	0.178152	3.90597e-05	0.000695139
UNC93B1	0.253292	3.69442e-09	5.52931e-07	0.149111	0.000594389	0.00607957	0.18605	1.71961e-05	0.000389826
AP2A2	-0.21254	8.48132e-07	2.96612e-05	-0.200285	3.58735e-06	0.000215225	-0.19441	6.94584e-06	0.000212016
DNAJC18	-0.211537	9.57463e-07	3.27145e-05	-0.203474	2.48551e-06	0.000170423	-0.192076	8.98241e-06	0.000248867
OAS1	0.221484	2.80141e-07	1.29544e-05	0.196974	5.21876e-06	0.000263188	0.185388	1.8444e-05	0.0004101
ZFP69B	-0.21449	6.68795e-07	2.47579e-05	-0.212869	8.14928e-07	8.21955e-05	-0.178307	3.84486e-05	0.00068876
PHF13	-0.178786	3.66156e-05	0.000537042	-0.205588	1.94269e-06	0.000147761	-0.226416	1.49037e-07	1.78832e-05
DUSP4	0.167954	0.000107056	0.00123763	0.226486	1.47695e-07	2.70495e-05	0.215519	5.89537e-07	4.28421e-05
SLC52A3	0.245582	1.11643e-08	1.25319e-06	0.146564	0.000738583	0.00703651	0.197783	4.76475e-06	0.000164977
SMARCA5-AS1	-0.174357	5.72201e-05	0.00076215	-0.223663	2.12346e-07	3.39707e-05	-0.211932	9.12944e-07	5.72399e-05
DZIP1	-0.237701	3.32944e-08	2.72268e-06	-0.151686	0.000475583	0.00529044	-0.204046	2.32586e-06	0.000103101
CRBN	-0.187567	1.46299e-05	0.00026305	-0.180746	2.99475e-05	0.000808043	-0.235909	4.24562e-08	7.8793e-06
STXBP4	-0.215262	6.08434e-07	2.32726e-05	-0.200887	3.34892e-06	0.000209929	-0.187364	1.49511e-05	0.000352002
C19orf44	-0.206623	1.72016e-06	4.97774e-05	-0.198851	4.22304e-06	0.000237978	-0.199319	4.00443e-06	0.000145529
CLDN23	0.2807	5.34708e-11	3.74143e-08	0.125785	0.00382524	0.0220196	0.161913	0.000189381	0.00212752
HSF2	-0.203801	2.39301e-06	6.43018e-05	-0.205987	1.85372e-06	0.000144145	-0.195777	5.96653e-06	0.000191797
TTLL7	-0.224481	1.91233e-07	9.37476e-06	-0.164932	0.000142758	0.00234323	-0.207232	1.60096e-06	8.19257e-05
ESRP2	0.280987	5.10165e-11	3.74143e-08	0.124656	0.00415613	0.0233075	0.162387	0.000181213	0.00206679
ELAVL1	-0.226604	1.45438e-07	7.78597e-06	-0.179263	3.48744e-05	0.000897259	-0.19152	9.54545e-06	0.000259821
PRKAR2A	-0.191163	9.92375e-06	0.000198176	-0.194985	6.51683e-06	0.000299027	-0.219278	3.69746e-07	3.18784e-05
FAM102A	0.22701	1.37996e-07	7.62209e-06	0.17827	3.85923e-05	0.000957516	0.191509	9.5563e-06	0.000259821
VHL	-0.131794	0.0024329	0.0137321	-0.238232	3.09687e-08	1.02632e-05	-0.230096	9.21826e-08	1.37145e-05
STX2	-0.263262	8.36579e-10	1.90891e-07	-0.160407	0.00021765	0.00313042	-0.154539	0.000369907	0.00343478
SERPINB1	0.210336	1.10642e-06	3.6236e-05	0.187519	1.47054e-05	0.000489677	0.201999	2.94739e-06	0.000120307
DHX30	-0.149981	0.000551486	0.00441157	-0.216467	5.24525e-07	6.34858e-05	-0.23615	4.10936e-08	7.83537e-06
FAM161A	-0.15774	0.000277604	0.00260726	-0.224232	1.97445e-07	3.31112e-05	-0.222168	2.56869e-07	2.55536e-05
SKI	-0.187026	1.55006e-05	0.000275899	-0.212186	8.85247e-07	8.58958e-05	-0.20528	2.01406e-06	9.45234e-05
GPSM1	-0.256321	2.36826e-09	3.78895e-07	-0.160035	0.000225201	0.0032097	-0.163858	0.000157942	0.00188219
PROM2	0.263306	8.31005e-10	1.90891e-07	0.134769	0.00193101	0.0137694	0.174675	5.54391e-05	0.000893121
ISG20	0.193146	7.9869e-06	0.000167677	0.208341	1.40389e-06	0.000116314	0.201793	3.018e-06	0.000120508
PCOLCE	-0.263454	8.12535e-10	1.90891e-07	-0.157399	0.00028631	0.00375603	-0.154339	0.000376559	0.00347799
ERO1L	0.176057	4.82737e-05	0.000660689	0.180421	3.09663e-05	0.000827294	0.241713	1.91807e-08	4.8541e-06
FMNL3	-0.269746	3.07841e-10	1.22424e-07	-0.129376	0.00292541	0.0182923	-0.170527	8.34579e-05	0.00119389
SRP9P1	-0.12513	0.0040143	0.020164	-0.239107	2.74713e-08	9.78491e-06	-0.230107	9.20514e-08	1.37145e-05
CDH3	0.236289	4.03298e-08	3.08435e-06	0.158378	0.000262002	0.00354159	0.191272	9.80691e-06	0.00026454
LAMC2	0.21557	5.85785e-07	2.27344e-05	0.169465	9.25316e-05	0.0017176	0.20862	1.3581e-06	7.46306e-05
S100PBP	-0.197534	4.90031e-06	0.000112183	-0.166931	0.000118076	0.00205107	-0.231273	7.89233e-08	1.27736e-05
EML2	0.237226	3.55133e-08	2.79271e-06	0.198883	4.2075e-06	0.000237978	0.150021	0.000549601	0.00453999
ANXA8L2	0.211483	9.63815e-07	3.27204e-05	0.175903	4.90237e-05	0.00113161	0.207288	1.59032e-06	8.16812e-05
TET1	-0.178988	3.58678e-05	0.000527742	-0.220137	3.32003e-07	4.62114e-05	-0.201112	3.26373e-06	0.00012654
CLIP3	-0.239014	2.7826e-08	2.3908e-06	-0.130372	0.00271239	0.0173909	-0.208004	1.46107e-06	7.76458e-05
ACAA2	-0.179745	3.31953e-05	0.000494167	-0.197582	4.87355e-06	0.000253116	-0.221972	2.6335e-07	2.58138e-05
LY6E	0.20595	1.86188e-06	5.28889e-05	0.197454	4.94458e-06	0.000254164	0.192085	8.9734e-06	0.000248867
RPP14	-0.154956	0.000356444	0.00315206	-0.216252	5.38644e-07	6.46327e-05	-0.227328	1.32402e-07	1.67536e-05
TMEM87B	0.198356	4.46609e-06	0.000104477	0.185498	1.82322e-05	0.00057415	0.211687	9.40329e-07	5.86926e-05
CRMP1	-0.239348	2.65779e-08	2.31802e-06	-0.177704	4.08762e-05	0.000999922	-0.167007	0.000117219	0.00152016
ZNF667-AS1	-0.155233	0.000347755	0.00309489	-0.179821	3.29375e-05	0.00086665	-0.256467	2.31778e-09	1.34422e-06
UPK2	0.237649	3.35288e-08	2.72268e-06	0.165228	0.000138813	0.00231671	0.180813	2.97423e-05	0.000578998
PRSS8	0.245659	1.10446e-08	1.25319e-06	0.15027	0.000537852	0.00570352	0.182144	2.59125e-05	0.000516728
HLA-K	0.1908	1.03239e-05	0.000202802	0.172768	6.69859e-05	0.0013782	0.230792	8.41104e-08	1.33038e-05
QRICH1	-0.16347	0.000163796	0.00173639	-0.204904	2.1044e-06	0.000154979	-0.229838	9.53756e-08	1.38285e-05
TULP3	-0.237966	3.21117e-08	2.70887e-06	-0.175942	4.88339e-05	0.0011291	-0.170125	8.67832e-05	0.00122014
HLA-DRA	0.16116	0.000203044	0.00204795	0.234088	5.42466e-08	1.51012e-05	0.201589	3.08995e-06	0.000122185
KLF5	0.245902	1.06709e-08	1.22751e-06	0.159109	0.000245119	0.00341865	0.174426	5.68327e-05	0.000907582
PCBP4	-0.211099	1.0094e-06	3.37884e-05	-0.195084	6.44525e-06	0.000298045	-0.184067	2.11976e-05	0.00044977
C11orf74	-0.23519	4.67836e-08	3.374e-06	-0.194397	6.95603e-06	0.000311321	-0.150486	0.000527918	0.00441592
BIK	0.243787	1.43668e-08	1.48195e-06	0.149248	0.000587464	0.00603992	0.181904	2.6567e-05	0.000526761
ANXA8	0.212837	8.18087e-07	2.88277e-05	0.168371	0.000102846	0.00185037	0.206082	1.83329e-06	9.03144e-05
USP22	-0.228053	1.20482e-07	6.84483e-06	-0.18121	2.85454e-05	0.000780596	-0.174421	5.68584e-05	0.000907582
HDAC2	-0.151198	0.000496235	0.00406587	-0.238656	2.92212e-08	9.92025e-06	-0.2018	3.01557e-06	0.000120508
KHDRBS1	-0.150231	0.000539664	0.00433694	-0.234392	5.2082e-08	1.47945e-05	-0.207665	1.52105e-06	7.98308e-05
SACS	-0.243784	1.43734e-08	1.48195e-06	-0.169463	9.25498e-05	0.0017176	-0.162706	0.000175904	0.00201847
ZNF286B	-0.207718	1.51146e-06	4.52429e-05	-0.180387	3.10762e-05	0.000828639	-0.19956	3.89656e-06	0.00014198
SP4	-0.183953	2.14541e-05	0.000350034	-0.196682	5.39222e-06	0.000268051	-0.212173	8.86665e-07	5.71365e-05
ZNF271	-0.223454	2.18092e-07	1.03253e-05	-0.15388	0.000392179	0.00463635	-0.202791	2.69028e-06	0.00011211
DOCK3	-0.140828	0.00118939	0.00796689	-0.180113	3.19637e-05	0.000847434	-0.261693	1.06136e-09	8.14038e-07
SPINT1	0.242579	1.70053e-08	1.65522e-06	0.140063	0.00126584	0.0103096	0.188002	1.39654e-05	0.000336305
FXYD5	0.10539	0.015504	0.0554582	0.217239	4.76706e-07	5.97771e-05	0.253351	3.66283e-09	1.79543e-06
PSD4	0.25832	1.76056e-09	3.06315e-07	0.140014	0.00127084	0.0103262	0.163811	0.000158642	0.00188408
LGALS3	0.187082	1.54082e-05	0.000274605	0.223959	2.04454e-07	3.31291e-05	0.178983	3.58881e-05	0.000655546
RNU4-46P	0.236064	4.15758e-08	3.14508e-06	0.151052	0.00050257	0.00546157	0.187483	1.47627e-05	0.000348276
SLCO3A1	0.166099	0.000127814	0.00143596	0.221296	2.86888e-07	4.1167e-05	0.203947	2.35283e-06	0.000103651
TNKS	-0.230926	8.26284e-08	5.08896e-06	-0.171522	7.57163e-05	0.00148491	-0.175793	4.95679e-05	0.000819402
DDR1	0.235985	4.20223e-08	3.14599e-06	0.167497	0.000111852	0.00196822	0.172643	6.78203e-05	0.00103583
FYB	0.175986	4.86177e-05	0.000664745	0.189402	1.20123e-05	0.000426527	0.223538	2.15772e-07	2.27525e-05
DUSP5	0.163634	0.000161294	0.0017164	0.199517	3.91532e-06	0.00022898	0.227619	1.27483e-07	1.65315e-05
F3	0.202286	2.85163e-06	7.3914e-05	0.179124	3.53721e-05	0.000902108	0.204755	2.14137e-06	9.77239e-05
SSBP3	-0.151959	0.000464352	0.00385305	-0.21222	8.81641e-07	8.58958e-05	-0.225088	1.76879e-07	1.98547e-05
MALL	0.233384	5.96032e-08	4.00781e-06	0.137727	0.00152793	0.0117889	0.1998	3.79119e-06	0.000140344
NPAS2	0.141477	0.00112799	0.00764224	0.224524	1.90189e-07	3.23597e-05	0.220308	3.24915e-07	2.95323e-05
DLG4	-0.228066	1.20279e-07	6.84483e-06	-0.173431	6.27375e-05	0.0013191	-0.17594	4.88424e-05	0.000810122
PDGFRB	-0.247873	8.06888e-09	1.00277e-06	-0.154111	0.000384253	0.00458559	-0.165932	0.000129858	0.00162564
TMOD3	0.190492	1.0675e-05	0.000206655	0.188876	1.27141e-05	0.000445026	0.207367	1.5757e-06	8.14563e-05
ELP6	-0.188904	1.26751e-05	0.000237726	-0.18156	2.75306e-05	0.000762128	-0.215499	5.90967e-07	4.28421e-05
ARL3	-0.190563	1.05938e-05	0.000205558	-0.208138	1.43808e-06	0.000117745	-0.188258	1.35873e-05	0.00033121
LY6D	0.218765	3.94247e-07	1.68847e-05	0.151537	0.000481798	0.00533319	0.206159	1.81672e-06	9.03102e-05
IFIT2	0.187772	1.43136e-05	0.000258742	0.208446	1.38651e-06	0.000115562	0.190275	1.09299e-05	0.000281729
KANK2	-0.233546	5.83261e-08	3.9602e-06	-0.150903	0.000509121	0.0055019	-0.185875	1.75181e-05	0.000394553
PCM1	-0.184438	2.03885e-05	0.000334655	-0.193781	7.44675e-06	0.000318927	-0.207431	1.5637e-06	8.1213e-05
FAM83A-AS1	0.176141	4.78658e-05	0.000658916	0.193132	7.99916e-06	0.00033137	0.216486	5.23278e-07	3.98056e-05
ADAM15	0.226163	1.53983e-07	8.09877e-06	0.160663	0.000212582	0.00309835	0.187581	1.46094e-05	0.000346419
ANXA8L1	0.203715	2.41702e-06	6.48219e-05	0.171371	7.68526e-05	0.0014961	0.205909	1.87081e-06	9.1048e-05
RBPMS2	-0.200517	3.49345e-06	8.61304e-05	-0.167539	0.0001114	0.00196276	-0.213155	7.87106e-07	5.29262e-05
TTC28-AS1	-0.189409	1.2003e-05	0.000227616	-0.194496	6.88016e-06	0.000309919	-0.201064	3.28178e-06	0.000126886
FAM83B	0.259069	1.57432e-09	2.84584e-07	0.14315	0.000982847	0.00860393	0.153383	0.000409786	0.00369021
TMC5	0.234784	4.94082e-08	3.54491e-06	0.153966	0.000389208	0.00460662	0.181148	2.87313e-05	0.000562462
MYOF	0.164694	0.000146002	0.00158519	0.176054	4.82882e-05	0.00112189	0.240621	2.23089e-08	5.18789e-06
AQP3	0.235656	4.39345e-08	3.25765e-06	0.166563	0.000122286	0.00210917	0.168605	0.000100545	0.00135085
MYO1E	0.171203	7.81216e-05	0.000977855	0.205769	1.90193e-06	0.000146659	0.210446	1.09191e-06	6.52289e-05
RAP2B	0.173635	6.14784e-05	0.000805761	0.201066	3.28095e-06	0.00020664	0.212018	9.03447e-07	5.72399e-05
FAM3C	0.17874	3.67894e-05	0.000539022	0.203499	2.47836e-06	0.000170423	0.203573	2.45729e-06	0.000106221
RNF39	0.214957	6.31638e-07	2.38907e-05	0.167997	0.000106612	0.00190247	0.193862	7.38001e-06	0.000219492
KIAA1009	-0.163897	0.00015736	0.00168354	-0.211917	9.14579e-07	8.77932e-05	-0.209674	1.19766e-06	6.91466e-05
ST6GALNAC2	0.201942	2.96688e-06	7.61918e-05	0.213518	7.53119e-07	7.8191e-05	0.164998	0.000141865	0.00173975
UCA1	0.240631	2.2278e-08	2.0061e-06	0.153126	0.000419178	0.00486212	0.171821	7.35297e-05	0.00110168
THAP8	-0.214746	6.48226e-07	2.43198e-05	-0.141515	0.00112445	0.00947986	-0.214548	6.64063e-07	4.66823e-05
VASH1	-0.210067	1.14266e-06	3.71605e-05	-0.187786	1.42909e-05	0.000478161	-0.18018	3.17446e-05	0.000606109
TSPAN15	0.259073	1.57342e-09	2.84584e-07	0.128353	0.00315974	0.0191887	0.162736	0.000175418	0.00201789
CD320	-0.224028	2.02661e-07	9.82869e-06	-0.186465	1.64554e-05	0.000535148	-0.161921	0.000189236	0.00212752
LAMA3	0.228341	1.16039e-07	6.70187e-06	0.15578	0.000331189	0.00415673	0.185619	1.79989e-05	0.000404075
PTMS	-0.233746	5.67922e-08	3.91332e-06	-0.148884	0.000606092	0.00615331	-0.183092	2.34753e-05	0.00048403
DNAJC11	-0.141228	0.00115122	0.00776724	-0.216998	4.91179e-07	6.05019e-05	-0.222243	2.54434e-07	2.55536e-05
PIANP	-0.206776	1.68938e-06	4.91934e-05	-0.164919	0.000142935	0.00234336	-0.203731	2.4126e-06	0.000104613
WIZ	-0.210638	1.067e-06	3.53608e-05	-0.185233	1.87482e-05	0.0005853	-0.180552	3.0551e-05	0.000588974
DCLK2	-0.223499	2.16836e-07	1.03008e-05	-0.166895	0.000118475	0.00205107	-0.180456	3.0856e-05	0.000593211
KDM4A-AS1	-0.146171	0.000763478	0.00566273	-0.209312	1.25061e-06	0.00010905	-0.224156	1.99361e-07	2.13454e-05
VGLL4	-0.185247	1.87212e-05	0.000316239	-0.184993	1.92309e-05	0.000594834	-0.209331	1.24769e-06	7.0394e-05
PSMB8	0.16988	8.88776e-05	0.00107293	0.215551	5.87198e-07	6.811e-05	0.196449	5.53481e-06	0.000182557
KCNK1	0.243264	1.54558e-08	1.5477e-06	0.147396	0.000688276	0.00670407	0.168672	9.99045e-05	0.00134615
WNT7B	0.210081	1.14072e-06	3.71605e-05	0.155492	0.00033983	0.00423086	0.206068	1.83627e-06	9.03144e-05
ZNF627	-0.200135	3.64944e-06	8.92735e-05	-0.182601	2.47101e-05	0.000712091	-0.193456	7.71855e-06	0.000225703
ZNF37A	-0.142822	0.00100979	0.00701359	-0.213468	7.57667e-07	7.8191e-05	-0.221595	2.76224e-07	2.634e-05
DENND2D	0.233127	6.16881e-08	4.10831e-06	0.166087	0.00012796	0.00217204	0.165932	0.000129858	0.00162564
ADIRF	0.234272	5.29259e-08	3.75855e-06	0.15888	0.000250314	0.00345646	0.171323	7.7208e-05	0.00114254
HIP1	-0.212183	8.85607e-07	3.05118e-05	-0.160636	0.000213101	0.00309943	-0.197955	4.67308e-06	0.000162206
CLDN4	0.259526	1.47034e-09	2.73875e-07	0.125719	0.003844	0.0220834	0.159065	0.000246113	0.00255645
RHBDL2	0.208904	1.31288e-06	4.07901e-05	0.152068	0.000459948	0.00516466	0.208646	1.35385e-06	7.46306e-05
PTK2B	0.215587	5.84591e-07	2.27344e-05	0.150126	0.000544626	0.00574727	0.2018	3.01559e-06	0.000120508
CEP78	-0.161275	0.000200904	0.00203078	-0.20178	3.02279e-06	0.000195694	-0.216486	5.23253e-07	3.98056e-05
C1QL4	-0.167374	0.000113176	0.0013019	-0.215271	6.07763e-07	6.93397e-05	-0.196854	5.28966e-06	0.000176141
DNAJC8	-0.168375	0.000102801	0.0011984	-0.18987	1.14199e-05	0.000409673	-0.218937	3.85876e-07	3.2951e-05
UNC119B	-0.185945	1.73894e-05	0.000299929	-0.190736	1.03956e-05	0.000383276	-0.199711	3.83005e-06	0.000141407
SERAC1	-0.184447	2.03696e-05	0.000334655	-0.176828	4.46638e-05	0.00106817	-0.214643	6.56406e-07	4.66149e-05
DEAF1	-0.187664	1.44799e-05	0.000261069	-0.189286	1.21635e-05	0.000429704	-0.198836	4.23011e-06	0.000150972
SNAPC3	-0.18566	1.79224e-05	0.000305339	-0.166384	0.000124398	0.00213501	-0.22168	2.73256e-07	2.634e-05
POMGNT2	-0.168319	0.000103362	0.00120293	-0.204163	2.29437e-06	0.000161404	-0.206084	1.8328e-06	9.03144e-05
TCF3	-0.178883	3.62556e-05	0.000532884	-0.213715	7.35228e-07	7.8191e-05	-0.184874	1.94728e-05	0.000424166
TEAD2	-0.175274	5.22137e-05	0.000707656	-0.208186	1.4299e-06	0.000117745	-0.194337	7.00232e-06	0.000212591
MTMR9	-0.232716	6.51593e-08	4.19885e-06	-0.158616	0.000256399	0.00350624	-0.170066	8.72845e-05	0.00122242
MRC2	-0.226856	1.4077e-07	7.63774e-06	-0.141582	0.0011183	0.00945373	-0.191993	9.06373e-06	0.000249818
ZNF184	-0.173509	6.22518e-05	0.000812965	-0.17613	4.79181e-05	0.00112189	-0.225016	1.78532e-07	1.98799e-05
FAM3C2	0.178071	3.9383e-05	0.000564544	0.197946	4.67769e-06	0.000251427	0.200709	3.4179e-06	0.000131057
PTBP2	-0.147925	0.000657912	0.00504822	-0.206996	1.64613e-06	0.000130928	-0.219776	3.47405e-07	3.06046e-05
ZC4H2	-0.195269	6.31418e-06	0.000138187	-0.187167	1.52696e-05	0.000504841	-0.189712	1.16174e-05	0.000294541
CYB561	0.209515	1.2206e-06	3.87006e-05	0.171786	7.37865e-05	0.0014688	0.186614	1.61957e-05	0.000371381
EVPL	0.274082	1.55404e-10	7.27302e-08	0.09822	0.0241404	0.0806958	0.153291	0.000413132	0.00371472
FA2H	0.246709	9.51934e-09	1.11247e-06	0.13859	0.00142577	0.0111855	0.164827	0.000144182	0.0017635
EML1	-0.222103	2.59e-07	1.21791e-05	-0.15847	0.000259824	0.00353173	-0.182012	2.62703e-05	0.000522366
XPC	-0.17739	4.22002e-05	0.000597543	-0.171386	7.67371e-05	0.00149594	-0.222302	2.52555e-07	2.55536e-05
FAM83H-AS1	0.262791	8.98653e-10	2.01748e-07	0.128329	0.00316538	0.0191906	0.145659	0.000797156	0.00597824
IFIT3	0.166555	0.000122384	0.00138268	0.214078	7.03403e-07	7.70919e-05	0.194006	7.26336e-06	0.000218828
DUSP10	0.128876	0.00303777	0.0162501	0.244886	1.23145e-08	5.25018e-06	0.190299	1.09011e-05	0.000281507
TMBIM1	0.199097	4.10674e-06	9.77124e-05	0.157787	0.000276437	0.00366101	0.209447	1.23057e-06	6.99116e-05
SP110	0.148483	0.000627321	0.00485903	0.227465	1.30062e-07	2.54977e-05	0.194812	6.64317e-06	0.000205938
MIB1	-0.186478	1.64322e-05	0.000288061	-0.200518	3.49307e-06	0.000212641	-0.185065	1.90842e-05	0.000418288
STRIP1	-0.184546	2.01577e-05	0.000332059	-0.16855	0.000101079	0.00182717	-0.21567	5.7867e-07	4.23921e-05
MISP	0.236675	3.82749e-08	2.97306e-06	0.130249	0.00273783	0.0174647	0.182567	2.47966e-05	0.000500934
LRRC40	-0.161094	0.000204291	0.00205904	-0.200744	3.4041e-06	0.000209929	-0.211118	1.00715e-06	6.12165e-05
NASP	-0.136113	0.00173714	0.0106614	-0.205698	1.91766e-06	0.000146659	-0.226926	1.39503e-07	1.71835e-05
FAM64A	-0.191322	9.75327e-06	0.000195613	-0.183603	2.22541e-05	0.000653492	-0.19432	7.0158e-06	0.000212591
RSBN1	-0.159679	0.000232687	0.002279	-0.174922	5.40861e-05	0.00119877	-0.233555	5.82608e-08	1.00115e-05
TIMM22	-0.171605	7.51048e-05	0.000948624	-0.196037	5.7963e-06	0.000280399	-0.203918	2.3606e-06	0.000103651
SMAD4	-0.20077	3.39402e-06	8.43595e-05	-0.17528	5.21866e-05	0.00116595	-0.190329	1.08663e-05	0.00028113
GJB4	0.190899	1.0213e-05	0.000201569	0.176325	4.69884e-05	0.00111041	0.200894	3.34618e-06	0.000129018
KCNK6	0.219519	3.58784e-07	1.56226e-05	0.141261	0.00114807	0.00960916	0.195102	6.43237e-06	0.000199849
ANKRD22	0.225414	1.69609e-07	8.58467e-06	0.129933	0.00280446	0.0177353	0.195361	6.24973e-06	0.000197256
RIMS3	-0.137567	0.00154758	0.00981355	-0.199129	4.09177e-06	0.000235344	-0.230129	9.17933e-08	1.37145e-05
MTR	-0.184564	2.01203e-05	0.000332059	-0.179723	3.32682e-05	0.000868781	-0.202892	2.65876e-06	0.000111133
BAI2	-0.183323	2.29162e-05	0.000369607	-0.173554	6.19724e-05	0.00131093	-0.210199	1.12466e-06	6.65107e-05
CHN1	-0.231116	8.05771e-08	5.00693e-06	-0.146699	0.000730159	0.00697056	-0.174184	5.8215e-05	0.000924993
TLDC1	0.161289	0.000200636	0.00202955	0.17553	5.08966e-05	0.00114968	0.229545	9.91117e-08	1.39424e-05
PXN-AS1	0.215365	6.00779e-07	2.31001e-05	0.172589	6.81765e-05	0.00138533	0.172906	6.60795e-05	0.00101856
SOX13	0.232794	6.44841e-08	4.19418e-06	0.168646	0.000100152	0.00181725	0.150797	0.000513839	0.00432413
FAM83H	0.258451	1.72654e-09	3.04198e-07	0.115374	0.00802184	0.0367895	0.156848	0.000300889	0.00295559
KLHDC10	-0.159104	0.000245239	0.00235748	-0.192835	8.26487e-06	0.000339018	-0.215695	5.76909e-07	4.23921e-05
DNAJA4	0.224819	1.83112e-07	9.11378e-06	0.176221	4.74853e-05	0.00111852	0.15497	0.000355999	0.00333455
TNPO2	-0.192487	8.58698e-06	0.000176547	-0.195212	6.35474e-06	0.000296024	-0.178931	3.60775e-05	0.00065728
IER5	0.174505	5.63873e-05	0.000753944	0.194221	7.09325e-06	0.000313677	0.199204	4.05701e-06	0.000147056
RAB23	-0.215237	6.10281e-07	2.32726e-05	-0.159429	0.000238069	0.00334716	-0.184119	2.10835e-05	0.000448717
GJA1	-0.201666	3.06262e-06	7.80743e-05	-0.193888	7.35881e-06	0.000318592	-0.167867	0.000107948	0.00142554
MUC20	0.240723	2.19959e-08	2.0023e-06	0.133626	0.00211144	0.0145689	0.170074	8.72169e-05	0.00122242
TFAP2C	0.177644	4.1125e-05	0.000586495	0.220488	3.17635e-07	4.51139e-05	0.168458	0.000101983	0.00136359
CEACAM6	0.224477	1.91317e-07	9.37476e-06	0.154697	0.000364766	0.00444013	0.175019	5.3567e-05	0.000876144
PIAS4	-0.167269	0.000114316	0.00131176	-0.176574	4.58242e-05	0.00108844	-0.222006	2.62196e-07	2.58138e-05
ZNF71	-0.197483	4.92863e-06	0.000112462	-0.178823	3.64785e-05	0.000921497	-0.187078	1.54144e-05	0.000358302
KIAA1143	-0.145989	0.000775286	0.00574001	-0.227678	1.26521e-07	2.51578e-05	-0.191508	9.55733e-06	0.000259821
RTP4	0.183985	2.13814e-05	0.000349304	0.224823	1.83019e-07	3.23103e-05	0.15451	0.000370868	0.00343911
KPNA5	-0.137508	0.00155485	0.00983725	-0.21424	6.89557e-07	7.61742e-05	-0.213167	7.86e-07	5.29262e-05
ROBO1	-0.229227	1.03334e-07	6.04328e-06	-0.149606	0.000569642	0.00592147	-0.1716	7.5146e-05	0.00111867
SEC61A2	-0.152265	0.000452077	0.00377246	-0.184153	2.10079e-05	0.000627488	-0.227105	1.36295e-07	1.69383e-05
RIPK4	0.202731	2.70881e-06	7.13122e-05	0.179165	3.52247e-05	0.000902108	0.17934	3.46007e-05	0.000641287
C10orf54	0.219766	3.47818e-07	1.53205e-05	0.145574	0.00080285	0.00744495	0.186892	1.57241e-05	0.000363562
KLHL8	-0.178704	3.69241e-05	0.00053986	-0.182157	2.58783e-05	0.000737076	-0.203744	2.4089e-06	0.000104613
ZNF37BP	-0.137749	0.00152523	0.00968505	-0.217767	4.46468e-07	5.75407e-05	-0.208403	1.39349e-06	7.57653e-05
ARID1A	-0.113102	0.00936012	0.0379062	-0.228515	1.13431e-07	2.32182e-05	-0.21416	6.96398e-07	4.84658e-05
SYTL1	0.250115	5.85308e-09	7.98716e-07	0.130983	0.00258889	0.016886	0.155617	0.000336033	0.0032014
FZD6	0.179878	3.27453e-05	0.000490088	0.185115	1.8984e-05	0.000591137	0.199016	4.14463e-06	0.000149842
S100A6	0.180805	2.97655e-05	0.000453786	0.190059	1.11889e-05	0.000406629	0.192813	8.28431e-06	0.000236232
SLC16A5	0.241188	2.06266e-08	1.92686e-06	0.127928	0.00326211	0.0195577	0.170879	8.0634e-05	0.00116547
CCNJ	-0.144745	0.000860654	0.0062212	-0.228841	1.08692e-07	2.29193e-05	-0.188998	1.25476e-05	0.00031132
KIAA1586	-0.20853	1.37259e-06	4.18054e-05	-0.169104	9.58181e-05	0.00175955	-0.179915	3.26198e-05	0.000617735
PLEKHF2	0.237307	3.5127e-08	2.79237e-06	0.168786	9.88073e-05	0.00180485	0.138973	0.00138244	0.00904237
CLASP2	-0.188222	1.36399e-05	0.000250386	-0.181306	2.82661e-05	0.000777019	-0.192797	8.29927e-06	0.000236232
ID2	-0.162745	0.000175268	0.00183563	-0.184818	1.95892e-05	0.000600579	-0.215894	5.62928e-07	4.21258e-05
BRPF1	-0.150658	0.000520101	0.0042181	-0.194317	7.01781e-06	0.000312079	-0.217818	4.43633e-07	3.56932e-05
TGFB1	-0.247019	9.11069e-09	1.08386e-06	-0.163851	0.000158042	0.00252251	-0.127354	0.00340498	0.0173287
TINAGL1	0.217454	4.64153e-07	1.90788e-05	0.142133	0.00106879	0.00913087	0.190544	1.06157e-05	0.000278088
TNFSF10	0.221996	2.62529e-07	1.22312e-05	0.179573	3.37857e-05	0.000874921	0.149845	0.000557988	0.00458355
PRRT3	-0.143925	0.000921603	0.00654813	-0.19215	8.90991e-06	0.00035259	-0.224165	1.99144e-07	2.13454e-05
NT5DC2	-0.191403	9.668e-06	0.000194183	-0.180743	2.99555e-05	0.000808043	-0.188822	1.27882e-05	0.000316162
LPHN1	-0.141921	0.00108764	0.00743928	-0.202134	2.90187e-06	0.000189629	-0.21822	4.21991e-07	3.51718e-05
POLD4	0.183495	2.25082e-05	0.000364717	0.172651	6.77638e-05	0.00138503	0.204291	2.26032e-06	0.000100838
SYDE1	-0.247565	8.4306e-09	1.02935e-06	-0.118883	0.00628848	0.0310608	-0.166078	0.000128072	0.00161471
RNF122	-0.209852	1.17242e-06	3.75669e-05	-0.182475	2.50364e-05	0.000717194	-0.163418	0.000164598	0.0019297
TTC7A	0.217922	4.3796e-07	1.83062e-05	0.144273	0.000895262	0.00805504	0.187217	1.51878e-05	0.000355891
EFHD2	0.174746	5.5044e-05	0.00073882	0.168305	0.000103497	0.00185881	0.216923	4.95752e-07	3.89851e-05
PPL	0.240265	2.34313e-08	2.09065e-06	0.128651	0.00308981	0.0189125	0.168543	0.000101156	0.00135515
SDR42E1	0.21807	4.29965e-07	1.80806e-05	0.174412	5.69099e-05	0.00124549	0.158887	0.000250142	0.0025848
RASL10B	-0.18584	1.75835e-05	0.000301038	-0.196908	5.25728e-06	0.000263223	-0.177218	4.29378e-05	0.000744848
COL5A2	-0.194367	6.97907e-06	0.000150584	-0.177881	4.01499e-05	0.00098736	-0.185439	1.83459e-05	0.000409882
UBALD2	0.182325	2.54303e-05	0.000400866	0.191627	9.43391e-06	0.000360744	0.184563	2.01207e-05	0.00043286
CLMN	0.189713	1.16161e-05	0.000220579	0.167175	0.000115352	0.00201707	0.19965	3.85651e-06	0.000141633
PPAT	-0.169511	9.21131e-05	0.00110049	-0.191153	9.93451e-06	0.000373725	-0.198526	4.38139e-06	0.000154783
SIKE1	-0.151334	0.000490417	0.00402483	-0.160393	0.00021793	0.00313042	-0.241145	2.07508e-08	5.0672e-06
SDR16C5	0.171864	7.32248e-05	0.000929942	0.177971	3.97842e-05	0.000981837	0.209321	1.24918e-06	7.0394e-05
ZNF569	-0.185379	1.84618e-05	0.000312996	-0.165495	0.000135346	0.00226701	-0.205778	1.89993e-06	9.18466e-05
FAM193A	-0.192753	8.33898e-06	0.000173498	-0.153563	0.00040332	0.00472543	-0.207532	1.54524e-06	8.05552e-05
CAMTA1	-0.179174	3.51926e-05	0.000518746	-0.172592	6.81564e-05	0.00138533	-0.205541	1.95341e-06	9.31691e-05
EPN3	0.261281	1.12945e-09	2.34252e-07	0.120209	0.00572625	0.0291421	0.137346	0.00157503	0.00986185
CNPY4	-0.257599	1.95983e-09	3.28661e-07	-0.136681	0.00166071	0.012421	-0.128232	0.00318863	0.0165634
SH3TC2	0.173673	6.12453e-05	0.00080422	0.203521	2.472e-06	0.000170423	0.182765	2.42911e-05	0.000493588
EFNA1	0.242255	1.77909e-08	1.70781e-06	0.132491	0.00230562	0.0155034	0.158855	0.000250864	0.00258684
INPP4B	0.175082	5.3228e-05	0.000719301	0.207792	1.49831e-06	0.000121959	0.17615	4.78243e-05	0.000797205
TSTD3	-0.119181	0.00615789	0.0281206	-0.21705	4.87989e-07	6.05019e-05	-0.215959	5.58423e-07	4.20145e-05
NLGN2	-0.19344	7.73217e-06	0.000163067	-0.17065	8.24588e-05	0.00157874	-0.190515	1.06488e-05	0.000278088
ZBTB47	-0.21951	3.59167e-07	1.56226e-05	-0.144496	0.000878737	0.0079423	-0.180599	3.0406e-05	0.000587807
MAP4	-0.216553	5.18973e-07	2.08774e-05	-0.139758	0.00129747	0.0105058	-0.188143	1.37559e-05	0.000332987
MSRB3	-0.235982	4.204e-08	3.14599e-06	-0.149101	0.000594895	0.00607957	-0.152167	0.000455983	0.00396676
PON3	0.214875	6.37994e-07	2.40006e-05	0.122229	0.00495676	0.0262931	0.201761	3.02949e-06	0.000120508
SLX1A	0.193624	7.57653e-06	0.000160514	0.188716	1.29346e-05	0.00044897	0.172302	7.01317e-05	0.00106105
ADRB2	0.152488	0.000443357	0.00370859	0.205721	1.9125e-06	0.000146659	0.199585	3.88507e-06	0.000141933
ZNF30	-0.149357	0.000581979	0.00459737	-0.209246	1.2605e-06	0.00010905	-0.198604	4.34289e-06	0.0001546
HLA-DPA1	0.0714658	0.101254	0.217125	0.229933	9.41899e-08	2.08909e-05	0.226747	1.42779e-07	1.72812e-05
HSH2D	0.240611	2.23397e-08	2.0061e-06	0.132352	0.00233052	0.0156255	0.159104	0.000245232	0.00255302
STK36	-0.185822	1.76168e-05	0.000301238	-0.194646	6.76662e-06	0.000307793	-0.175152	5.28554e-05	0.000866542
CALB2	0.183439	2.26402e-05	0.000365578	0.164847	0.000143909	0.00235378	0.205342	1.9994e-06	9.45234e-05
KATNAL2	-0.172813	6.66893e-05	0.000857537	-0.189774	1.15389e-05	0.000412227	-0.192946	8.16426e-06	0.000233824
ST6GALNAC6	-0.192299	8.76496e-06	0.00017994	-0.192682	8.40435e-06	0.000341874	-0.168556	0.000101027	0.00135472
DIXDC1	-0.225775	1.61898e-07	8.35714e-06	-0.138894	0.00139128	0.011028	-0.174432	5.67984e-05	0.000907582
MDN1	-0.103025	0.0179923	0.0617901	-0.251421	4.84834e-09	3.21353e-06	-0.184661	1.99143e-05	0.000430414
HECTD2	-0.186883	1.57381e-05	0.000279056	-0.173027	6.52921e-05	0.0013544	-0.192969	8.14352e-06	0.000233824
ZNF441	-0.210344	1.1053e-06	3.6236e-05	-0.146504	0.00074235	0.00706273	-0.187352	1.49713e-05	0.000352002
TLN2	-0.22199	2.62743e-07	1.22312e-05	-0.157245	0.000290313	0.00379781	-0.163179	0.000168318	0.00196216
CTSH	0.24677	9.43822e-09	1.11247e-06	0.130556	0.00267452	0.0172345	0.149189	0.000590431	0.00476142
SRSF12	-0.197722	4.79748e-06	0.000110374	-0.196145	5.72651e-06	0.000278697	-0.156567	0.0003086	0.00300378
PHACTR4	-0.144982	0.000843759	0.00612735	-0.20484	2.12017e-06	0.000155319	-0.204341	2.24741e-06	0.000100838
SUGP2	-0.183943	2.14763e-05	0.000350034	-0.16384	0.000158212	0.00252251	-0.203171	2.57436e-06	0.000109254
PRRG4	0.217126	4.83428e-07	1.96821e-05	0.141092	0.00116402	0.00971922	0.182333	2.5408e-05	0.000511061
GPR161	-0.226863	1.40644e-07	7.63774e-06	-0.135322	0.00184902	0.0133627	-0.173417	6.28246e-05	0.000978137
ITGB6	0.230143	9.16194e-08	5.47318e-06	0.132378	0.00232587	0.0156093	0.170588	8.29618e-05	0.00118852
ACACB	-0.132042	0.00238689	0.0135284	-0.203779	2.39918e-06	0.000166971	-0.214965	6.31014e-07	4.50415e-05
EXOG	-0.181331	2.81921e-05	0.000434558	-0.176044	4.83348e-05	0.00112189	-0.194487	6.8874e-06	0.00021129
C1orf109	-0.151967	0.000464043	0.00385305	-0.189054	1.2472e-05	0.000439487	-0.211176	1.00005e-06	6.10513e-05
REST	-0.157223	0.000290905	0.00270477	-0.21159	9.51411e-07	9.00863e-05	-0.184665	1.99064e-05	0.000430414
POLR2B	-0.189985	1.12781e-05	0.000216226	-0.176971	4.40273e-05	0.00105476	-0.183746	2.19247e-05	0.000460108
TTC22	0.24359	1.47693e-08	1.50041e-06	0.123424	0.00454667	0.0248571	0.157357	0.000287406	0.00285336
FBXO17	-0.199548	3.90145e-06	9.3952e-05	-0.15366	0.000399897	0.00469718	-0.192455	8.61704e-06	0.000241816
DPH3	-0.2017	3.05049e-06	7.80512e-05	-0.134182	0.00202189	0.0141887	-0.20457	2.1881e-06	9.88353e-05
RAB38	0.149657	0.000567127	0.00450562	0.197514	4.91129e-06	0.000254127	0.204991	2.08315e-06	9.60112e-05
ELFN1	-0.188485	1.32596e-05	0.000245425	-0.166093	0.000127888	0.00217204	-0.194621	6.78559e-06	0.000208957
APOL3	0.153244	0.000414821	0.00353143	0.195536	6.12899e-06	0.000289185	0.20296	2.6382e-06	0.00011094
GLI1	-0.18732	1.50214e-05	0.000268399	-0.1765	4.61693e-05	0.00109477	-0.18611	1.70872e-05	0.000387988
ZSCAN21	-0.200549	3.48083e-06	8.60562e-05	-0.172238	7.05755e-05	0.00141752	-0.173905	5.98524e-05	0.000941755
CNOT7	-0.175604	5.05201e-05	0.000687199	-0.198269	4.51016e-06	0.000249115	-0.178498	3.77066e-05	0.000679843
DOCK7	-0.213171	7.85596e-07	2.78947e-05	-0.140097	0.00126233	0.0102931	-0.18523	1.87559e-05	0.000414773
ERBB3	0.219551	3.57344e-07	1.56226e-05	0.175851	4.92823e-05	0.00113528	0.143827	0.000929111	0.00671808
WDR47	-0.225544	1.66793e-07	8.47295e-06	-0.126692	0.00357686	0.0209859	-0.178327	3.83703e-05	0.000688242
HS3ST1	0.168588	0.000100718	0.00117876	0.169367	9.34095e-05	0.00173052	0.211198	9.97458e-07	6.10513e-05
CD37	-0.192699	8.38872e-06	0.000174273	-0.193517	7.66676e-06	0.000322568	-0.160976	0.000206523	0.0022599
EXTL2	-0.216127	5.47005e-07	2.15078e-05	-0.162438	0.000180351	0.00276466	-0.161716	0.000192867	0.00215768
NEFH	-0.141174	0.00115633	0.00779041	-0.181787	2.68913e-05	0.000756163	-0.223936	2.05058e-07	2.17878e-05
ABI2	-0.185222	1.87704e-05	0.000316686	-0.164889	0.000143332	0.00234711	-0.197114	5.13713e-06	0.000172714
EMP2	0.207083	1.6293e-06	4.78444e-05	0.158569	0.00025749	0.00351373	0.176803	4.47787e-05	0.00076758
DLX2	-0.205022	2.07575e-06	5.70997e-05	-0.141104	0.00116293	0.00971597	-0.192949	8.16147e-06	0.000233824
CCDC117	-0.148471	0.000627929	0.00486104	-0.193579	7.61425e-06	0.000322568	-0.20697	1.65126e-06	8.41903e-05
CSRNP2	-0.200495	3.50239e-06	8.61304e-05	-0.14867	0.000617343	0.00623118	-0.192204	8.8575e-06	0.000247069
ANO8	-0.147841	0.000662676	0.00507359	-0.186656	1.61233e-05	0.000526808	-0.213745	7.32528e-07	4.97368e-05
SHPRH	-0.15594	0.000326478	0.00296042	-0.223574	2.14773e-07	3.39707e-05	-0.167945	0.000107141	0.00141765
ELF1	0.209536	1.21757e-06	3.86924e-05	0.157526	0.00028303	0.00372706	0.173283	6.36626e-05	0.000990078
ENO1P4	-0.21929	3.69204e-07	1.60092e-05	-0.169693	9.05042e-05	0.00169091	-0.147606	0.000676053	0.00528354
ILF3	-0.153174	0.00041738	0.00354483	-0.218803	3.92371e-07	5.10412e-05	-0.176184	4.76579e-05	0.000796339
DTX3L	0.202936	2.64528e-06	6.98665e-05	0.193596	7.60048e-06	0.000322568	0.14456	0.000874106	0.00642719
IVL	0.227288	1.33102e-07	7.47037e-06	0.139073	0.0013714	0.0109202	0.164323	0.000151194	0.00182838
HERC6	0.187802	1.42675e-05	0.00025858	0.181283	2.83337e-05	0.000777019	0.177082	4.35325e-05	0.000750841
JUP	0.243691	1.45619e-08	1.49034e-06	0.102221	0.0189141	0.0681391	0.16729	0.00011409	0.00148969
EIF4G3	-0.207969	1.46713e-06	4.42971e-05	-0.144053	0.000911794	0.0081721	-0.184882	1.94567e-05	0.000424166
ST3GAL4	0.165902	0.000130227	0.00145945	0.21225	8.78426e-07	8.58958e-05	0.169845	8.91825e-05	0.00123735
PSCA	0.123234	0.0046098	0.0224445	0.217443	4.64807e-07	5.8815e-05	0.201942	2.96691e-06	0.000120508
APPL1	-0.138429	0.00144431	0.00928132	-0.20732	1.58441e-06	0.000126744	-0.199937	3.73275e-06	0.00013855
SPINT2	0.259504	1.47516e-09	2.73875e-07	0.0941649	0.030667	0.0953225	0.145035	0.000839993	0.00625233
MUC16	0.190984	1.01189e-05	0.000201207	0.147761	0.000667207	0.00657244	0.201314	3.18883e-06	0.000124678
TSPYL2	-0.16802	0.000106376	0.0012308	-0.168634	0.000100269	0.00181725	-0.208596	1.36189e-06	7.46306e-05
RECK	-0.242888	1.62888e-08	1.59665e-06	-0.131016	0.00258226	0.0168506	-0.145072	0.000837449	0.00624007
SERINC2	0.212728	8.28995e-07	2.90769e-05	0.143427	0.000960477	0.0084444	0.178335	3.83402e-05	0.000688242
TRADD	0.183613	2.22329e-05	0.000361096	0.173067	6.50391e-05	0.00135318	0.1876	1.45783e-05	0.000346272
SETD5	-0.119843	0.00587695	0.0272036	-0.192513	8.56231e-06	0.00034645	-0.22624	1.52474e-07	1.79854e-05
NCOR1	-0.159204	0.000243	0.00234645	-0.19774	4.78798e-06	0.000251427	-0.189922	1.13552e-05	0.000288418
MAST2	-0.179172	3.51993e-05	0.000518746	-0.160256	0.000220691	0.00316354	-0.203738	2.4105e-06	0.000104613
RN7SL731P	-0.252006	4.45443e-09	6.3899e-07	-0.114452	0.00854307	0.0385949	-0.142088	0.00107284	0.00750018
C1orf86	-0.16087	0.000208555	0.00209594	-0.189765	1.15503e-05	0.000412227	-0.193604	7.59396e-06	0.000222996
ARHGDIB	0.199142	4.08596e-06	9.73845e-05	0.161051	0.000205096	0.00302088	0.17896	3.59706e-05	0.000656192
SYNGAP1	-0.205493	1.96426e-06	5.5122e-05	-0.132019	0.00239111	0.0158864	-0.19368	7.53014e-06	0.00022159
KIF15	-0.139777	0.0012955	0.00852577	-0.214472	6.70269e-07	7.52376e-05	-0.189208	1.22661e-05	0.00030652
TGFA	0.165844	0.000130953	0.00146405	0.182921	2.38997e-05	0.000693042	0.195446	6.19089e-06	0.000196289
TAP2	0.136423	0.00169506	0.010514	0.212155	8.88641e-07	8.58958e-05	0.193744	7.47697e-06	0.000220959
PHF17	-0.194066	7.21602e-06	0.000153813	-0.15821	0.000266032	0.00357079	-0.186757	1.59505e-05	0.000367574
FAM53C	-0.168039	0.000106178	0.00122953	-0.169608	9.12517e-05	0.00170031	-0.204883	2.10953e-06	9.6906e-05
TRIM29	0.220094	3.33789e-07	1.50844e-05	0.139111	0.00136712	0.0108924	0.169693	9.05069e-05	0.00125072
LDOC1L	-0.226812	1.4158e-07	7.63817e-06	-0.136934	0.00162767	0.0122795	-0.161213	0.00020205	0.00222701
CBLC	0.237648	3.35345e-08	2.72268e-06	0.131857	0.00242111	0.0160329	0.149048	0.000597631	0.00479545
DDX60L	0.136364	0.00170292	0.0105425	0.200083	3.67105e-06	0.000218365	0.205771	1.90145e-06	9.18466e-05
ALDH3A1	0.219994	3.38021e-07	1.51283e-05	0.124805	0.00411099	0.0231218	0.180132	3.19026e-05	0.000608292
CST6	0.225623	1.6511e-07	8.41821e-06	0.137032	0.00161498	0.0122024	0.162121	0.00018575	0.0021035
PHF23	-0.190911	1.02e-05	0.000201569	-0.178786	3.66157e-05	0.000923286	-0.17044	8.41639e-05	0.00120028
CAB39	0.164193	0.000153049	0.0016419	0.170096	8.70277e-05	0.00163466	0.20693	1.65912e-06	8.42824e-05
ST13	-0.186309	1.67292e-05	0.000291797	-0.152874	0.000428551	0.00492568	-0.198271	4.50942e-06	0.000157705
DYNC1LI1	-0.191408	9.66255e-06	0.000194183	-0.153228	0.000415417	0.00482653	-0.192369	8.69827e-06	0.000243604
ESYT1	-0.166907	0.000118348	0.00134668	-0.191896	9.16067e-06	0.000354982	-0.182906	2.39364e-05	0.000489237
UBE4B	-0.149502	0.000574754	0.00454546	-0.187081	1.54097e-05	0.000507854	-0.204138	2.30102e-06	0.000102326
GRK4	-0.227095	1.36477e-07	7.59852e-06	-0.148192	0.0006431	0.00642592	-0.148783	0.000611377	0.00487386
CAV2	0.162212	0.000184191	0.0019019	0.179151	3.52747e-05	0.000902108	0.19961	3.87407e-06	0.000141903
RARRES3	0.161044	0.000205232	0.00206702	0.215469	5.93176e-07	6.82349e-05	0.164773	0.000144906	0.00176434
KDM4B	-0.197731	4.79288e-06	0.000110374	-0.154441	0.000373167	0.00450097	-0.182291	2.55203e-05	0.000511105
C7orf10	-0.209717	1.19147e-06	3.79497e-05	-0.158614	0.000256438	0.00350624	-0.163275	0.000166807	0.00194781
RFX7	-0.167146	0.000115672	0.00132405	-0.1755	5.10456e-05	0.00114968	-0.197268	5.04937e-06	0.000171003
NREP	-0.233849	5.60103e-08	3.87865e-06	-0.124607	0.00417106	0.023363	-0.157033	0.000295913	0.00292114
S100A9	0.204337	2.24831e-06	6.07655e-05	0.146832	0.000722011	0.00692126	0.179619	3.36277e-05	0.000631492
ARHGAP30	0.216673	5.11328e-07	2.06895e-05	0.169728	9.01969e-05	0.00168743	0.141772	0.00110099	0.00761657
B3GALT6	-0.177467	4.18714e-05	0.000594702	-0.197004	5.20124e-06	0.000263188	-0.16507	0.000140913	0.00173113
SAA2-SAA4	0.1842	2.09052e-05	0.000342732	0.15031	0.000536	0.00570352	0.199683	3.84216e-06	0.000141479
RAD54L2	-0.149743	0.000562928	0.00447737	-0.195885	5.89527e-06	0.000282953	-0.19388	7.36569e-06	0.000219492
TP73-AS1	-0.160316	0.000219465	0.00218351	-0.194604	6.79826e-06	0.000308225	-0.185221	1.87734e-05	0.000414773
ZNF250	-0.172413	6.93722e-05	0.000888309	-0.194936	6.55243e-06	0.000299027	-0.1718	7.36856e-05	0.00110283
RPL23AP53	-0.162377	0.00018138	0.00188124	-0.200785	3.3882e-06	0.000209929	-0.177211	4.2971e-05	0.000744848
LINC00839	-0.193457	7.71763e-06	0.000163007	-0.152537	0.000441431	0.00502805	-0.187012	1.55234e-05	0.000360117
LZTR1	-0.206298	1.78725e-06	5.13981e-05	-0.154173	0.000382144	0.00457557	-0.169461	9.25607e-05	0.00126806
UNC13D	0.234646	5.0337e-08	3.59303e-06	0.133997	0.00205126	0.0143323	0.145963	0.000777015	0.00587148
ARHGEF4	0.161659	0.000193888	0.00197679	0.174135	5.84975e-05	0.00126826	0.201368	3.16928e-06	0.000124388
RCOR2	-0.124203	0.00429612	0.0212576	-0.216679	5.10929e-07	6.23826e-05	-0.192571	8.50755e-06	0.000239226
LONP1	-0.182685	2.44947e-05	0.000389203	-0.15186	0.000468421	0.00524112	-0.198461	4.41377e-06	0.000155532
ASRGL1	-0.108135	0.0129993	0.0486128	-0.202567	2.76077e-06	0.000183862	-0.218039	4.31593e-07	3.55464e-05
UPP1	0.0987887	0.0233289	0.0751953	0.233807	5.63314e-08	1.53741e-05	0.190363	1.0826e-05	0.00028113
DAAM1	0.204211	2.2816e-06	6.15457e-05	0.154023	0.000387259	0.00459351	0.170929	8.02469e-05	0.0011635
MAD2L2	-0.15164	0.000477496	0.00393503	-0.188867	1.27251e-05	0.000445026	-0.195909	5.87916e-06	0.000190307
DDX60	0.164847	0.000143903	0.00156728	0.181674	2.72089e-05	0.000761814	0.190353	1.08376e-05	0.00028113
NTN4	0.163911	0.000157158	0.00168268	0.177506	4.17053e-05	0.00101485	0.195235	6.33809e-06	0.00019809
MTOR	-0.118578	0.00642452	0.028945	-0.179153	3.52702e-05	0.000902108	-0.230641	8.58022e-08	1.34189e-05
ZFP82	-0.178455	3.7872e-05	0.000547962	-0.14685	0.000720883	0.00691521	-0.205593	1.94162e-06	9.31691e-05
ZNF197	-0.190768	1.03602e-05	0.000203103	-0.157539	0.000282714	0.00372642	-0.183498	2.25005e-05	0.000467968
MILR1	0.133823	0.00207921	0.0121701	0.177123	4.3354e-05	0.00104583	0.221042	2.96238e-07	2.78603e-05
SEMA4B	0.191855	9.20156e-06	0.000186158	0.159987	0.000226196	0.00321925	0.180337	3.12378e-05	0.000598073
SDC4	0.171309	7.73202e-05	0.000969567	0.170682	8.22008e-05	0.00157814	0.192738	8.35367e-06	0.000236812
EIF4ENIF1	-0.183928	2.15102e-05	0.000350175	-0.164629	0.000146896	0.00239983	-0.184616	2.00099e-05	0.000431811
NEAT1	0.174367	5.71644e-05	0.000762137	0.191898	9.15878e-06	0.000354982	0.168749	9.91606e-05	0.00134157
CCDC106	-0.171082	7.90547e-05	0.000984073	-0.1583	0.000263872	0.00355894	-0.203818	2.38821e-06	0.000104533
VGLL1	0.217863	4.4118e-07	1.83856e-05	0.148795	0.000610771	0.00618278	0.1554	0.00034263	0.00324426
MRAS	-0.202048	2.93077e-06	7.54037e-05	-0.139197	0.00135776	0.0108325	-0.18355	2.23786e-05	0.000466298
CDCP1	0.215257	6.08786e-07	2.32726e-05	0.118038	0.00667186	0.0322714	0.182296	2.55061e-05	0.000511105
RAB25	0.240975	2.12442e-08	1.95827e-06	0.124423	0.00422754	0.0235844	0.139838	0.00128912	0.00859693
TUB	-0.190739	1.03926e-05	0.000203114	-0.143331	0.000968143	0.00848564	-0.193192	7.9466e-06	0.000230916
TNFAIP2	0.177192	4.30534e-05	0.000607154	0.156136	0.000320776	0.00407008	0.197619	4.85384e-06	0.000167229
ACOT4	0.219073	3.79386e-07	1.62984e-05	0.150928	0.000508033	0.00549441	0.14942	0.000578829	0.00468686
C19orf26	-0.202586	2.75448e-06	7.23071e-05	-0.158151	0.00026746	0.00358304	-0.165972	0.00012936	0.00162506
AIM2	0.150168	0.000542641	0.00435449	0.21392	7.17119e-07	7.79811e-05	0.169473	9.24533e-05	0.00126784
DGKA	0.207427	1.56453e-06	4.6235e-05	0.139713	0.00130219	0.0105214	0.174472	5.65685e-05	0.000906073
WDR7	-0.205527	1.95651e-06	5.5122e-05	-0.128524	0.00311936	0.0190348	-0.184836	1.9552e-05	0.000425225
MARVELD3	0.245586	1.11577e-08	1.25319e-06	0.106281	0.0146478	0.0569554	0.144745	0.000860635	0.00637277
INF2	0.225704	1.63393e-07	8.36126e-06	0.11741	0.00697045	0.0333064	0.165861	0.000130732	0.00163345
NCS1	-0.23736	3.48735e-08	2.78968e-06	-0.12448	0.0042102	0.0235254	-0.143023	0.000993157	0.00707098
CCDC64B	0.239056	2.76644e-08	2.3908e-06	0.12005	0.00579153	0.0293777	0.144012	0.000914919	0.00662301
MGLL	0.136275	0.00171492	0.0105854	0.202244	2.86538e-06	0.00018902	0.1927	8.38812e-06	0.000237305
DCLRE1B	-0.183521	2.24465e-05	0.000364141	-0.140822	0.00119004	0.0098552	-0.20055	3.48053e-06	0.000132365
CMTM3	-0.239457	2.61838e-08	2.30666e-06	-0.133962	0.00205683	0.014336	-0.130754	0.00263461	0.0144148
LINC00847	0.15754	0.000282671	0.00264593	0.23009	9.2265e-08	2.08909e-05	0.139764	0.00129686	0.00862862
DCTN1-AS1	-0.208642	1.35443e-06	4.16167e-05	-0.140556	0.0012161	0.0100077	-0.171048	7.93186e-05	0.00115566
ZNF667	-0.162398	0.000181039	0.00187988	-0.163331	0.000165937	0.00262762	-0.20467	2.16276e-06	9.83612e-05
GXYLT2	-0.195821	5.93736e-06	0.00013097	-0.14134	0.00114072	0.00955912	-0.18595	1.73799e-05	0.000392712
GSTA4	-0.192237	8.82497e-06	0.000180905	-0.157598	0.000281203	0.00371354	-0.17731	4.25398e-05	0.000741066
ARHGEF25	-0.228485	1.13878e-07	6.60445e-06	-0.130827	0.00261999	0.017025	-0.150378	0.000532869	0.00443866
ZSCAN20	-0.170039	8.75154e-05	0.00106109	-0.187988	1.39862e-05	0.000471365	-0.172869	6.63197e-05	0.00102
SAMD1	-0.149539	0.000572914	0.00453606	-0.188288	1.35426e-05	0.000462688	-0.192348	8.7187e-06	0.000243686
SLC3A2	0.165669	0.000133139	0.00148305	0.199477	3.93347e-06	0.000229079	0.166568	0.000122229	0.00155654
MAMSTR	-0.191918	9.13857e-06	0.000185422	-0.156881	0.000300021	0.00387725	-0.17741	4.21141e-05	0.000737341
MAP3K12	-0.215381	5.99578e-07	2.31001e-05	-0.118132	0.00662824	0.0321255	-0.177771	4.06003e-05	0.000716366
ABCA3	-0.147178	0.000701138	0.00530965	-0.185239	1.87384e-05	0.0005853	-0.197121	5.1334e-06	0.000172714
HNRNPH1	-0.141595	0.00111709	0.00759219	-0.188419	1.33535e-05	0.000459108	-0.198548	4.37027e-06	0.000154783
GPR115	0.184699	1.98361e-05	0.000329474	0.151245	0.000494221	0.00542786	0.189103	1.24062e-05	0.000308913
TADA3	-0.171664	7.46736e-05	0.000944035	-0.174621	5.57351e-05	0.00122555	-0.18312	2.34087e-05	0.00048342
ZNF471	-0.155132	0.000350927	0.00311316	-0.163126	0.000169143	0.00266022	-0.209642	1.2022e-06	6.91466e-05
ARID3A	-0.154488	0.000371606	0.00325922	-0.189897	1.13865e-05	0.000409673	-0.184682	1.98704e-05	0.000430414
ITPK1	0.202239	2.86712e-06	7.41773e-05	0.147316	0.000692925	0.00672518	0.170737	8.1763e-05	0.00117326
TRIM24	-0.12243	0.00488558	0.0235384	-0.198644	4.32303e-06	0.000240689	-0.203928	2.35809e-06	0.000103651
CXXC1	-0.150708	0.000517841	0.00420527	-0.183944	2.14739e-05	0.00063699	-0.193764	7.46071e-06	0.000220948
DLX1	-0.227032	1.37597e-07	7.62209e-06	-0.0917418	0.0352468	0.105438	-0.177369	4.22891e-05	0.000739475
PDCD10	0.195132	6.41115e-06	0.000140089	0.167704	0.000109656	0.0019394	0.16148	0.000197132	0.00218906
ENTPD1	-0.146747	0.000727244	0.00545394	-0.198954	4.17409e-06	0.000237139	-0.183735	2.19492e-05	0.000460108
RBM6	-0.107945	0.0131601	0.04903	-0.211373	9.76679e-07	9.12375e-05	-0.200357	3.55806e-06	0.000134479
ITPRIPL1	-0.214426	6.74054e-07	2.48864e-05	-0.14295	0.000999185	0.00871405	-0.157583	0.000281588	0.00280963
SLC25A20	-0.168701	9.96247e-05	0.00117019	-0.162329	0.000182192	0.00278674	-0.195994	5.82412e-06	0.000189406
DFFA	-0.128213	0.00319317	0.016916	-0.200139	3.64755e-06	0.000217898	-0.197303	5.0295e-06	0.000170745
ALKBH4	-0.169743	9.00627e-05	0.00108067	-0.194185	7.12134e-06	0.000313677	-0.164049	0.000155136	0.0018567
TFAP2A	0.15202	0.00046189	0.00384282	0.214541	6.64631e-07	7.52114e-05	0.161367	0.000199203	0.00220231
CNTLN	-0.190924	1.01858e-05	0.000201569	-0.175296	5.21034e-05	0.00116595	-0.158006	0.000271014	0.00273315
PTCH1	-0.12982	0.00282869	0.0154524	-0.193512	7.67081e-06	0.000322568	-0.200814	3.37682e-06	0.00012984
ZNF708	-0.116634	0.00735564	0.0320623	-0.199641	3.86071e-06	0.000226739	-0.20633	1.78061e-06	8.91524e-05
AIM1	0.198047	4.62503e-06	0.000107472	0.154143	0.000383166	0.00457951	0.168952	9.7239e-05	0.00132024
SSX2IP	-0.133542	0.00212523	0.0123563	-0.178095	3.92844e-05	0.000971225	-0.21286	8.15818e-07	5.42523e-05
DVL2	-0.151046	0.000502867	0.00411246	-0.180852	2.96222e-05	0.000802162	-0.19524	6.33489e-06	0.00019809
ZNF738	-0.112758	0.00957956	0.0385746	-0.210283	1.11337e-06	0.00010063	-0.197443	4.95061e-06	0.000169306
B3GNT7	0.162295	0.000182771	0.00189127	0.160175	0.00022234	0.00318063	0.203087	2.59965e-06	0.00010965
MOCOS	0.205304	2.00832e-06	5.57961e-05	0.168366	0.000102894	0.00185037	0.144074	0.000910251	0.00659885
ARHGEF40	-0.208497	1.37798e-06	4.18781e-05	-0.15454	0.000369895	0.00448256	-0.153667	0.000399649	0.00364249
TBPL1	-0.165043	0.000141262	0.0015482	-0.187333	1.50014e-05	0.000498341	-0.174814	5.46726e-05	0.000887281
RNF149	0.19346	7.71554e-06	0.000163007	0.121876	0.00508424	0.0267815	0.198365	4.46154e-06	0.000156819
TMEM87A	0.165052	0.000141148	0.00154818	0.19076	1.03684e-05	0.000383276	0.170782	8.14066e-05	0.00117036
CHMP7	-0.196412	5.55795e-06	0.000124353	-0.174811	5.46904e-05	0.0012064	-0.149538	0.000572974	0.0046513
RAB6B	-0.151641	0.000477473	0.00393503	-0.114139	0.00872645	0.0392324	-0.242859	1.63558e-08	4.55314e-06
SAT1	0.176636	4.55382e-05	0.000634481	0.185065	1.90843e-05	0.000592919	0.163823	0.000158465	0.00188408
MTF2	-0.0937291	0.031451	0.0939616	-0.202067	2.92446e-06	0.000190213	-0.216418	5.27667e-07	3.99163e-05
KLK6	0.236126	4.12277e-08	3.13578e-06	0.114996	0.00823181	0.0375544	0.145357	0.000817618	0.00611164
NIPAL1	0.208875	1.31739e-06	4.08391e-05	0.121657	0.0051648	0.0270056	0.179029	3.57198e-05	0.000653777
BAZ1B	-0.185791	1.76736e-05	0.000301839	-0.170166	8.64426e-05	0.00163256	-0.167395	0.00011295	0.0014762
METTL16	-0.153567	0.000403166	0.00345972	-0.197739	4.78836e-06	0.000251427	-0.175433	5.13894e-05	0.000844496
POLRMT	-0.148719	0.000614773	0.00479117	-0.191006	1.00951e-05	0.000376713	-0.18539	1.84406e-05	0.0004101
TATDN2	-0.126405	0.00365401	0.0187261	-0.197675	4.82297e-06	0.000251427	-0.198312	4.48857e-06	0.000157371
TAF6	-0.180337	3.12374e-05	0.000472088	-0.177851	4.0273e-05	0.000988641	-0.1663	0.000125388	0.00158931
PSMB10	0.187933	1.40688e-05	0.000255979	0.164043	0.000155228	0.00248921	0.170778	8.14319e-05	0.00117036
TMBIM6	0.223635	2.13093e-07	1.01577e-05	0.133847	0.0020754	0.0144149	0.148064	0.000650178	0.00511905
EPS8L1	0.243802	1.43364e-08	1.48195e-06	0.0986114	0.0235794	0.0793324	0.144653	0.000867301	0.00639744
ALS2	-0.196812	5.31458e-06	0.000119698	-0.146315	0.000754243	0.00714171	-0.174773	5.48986e-05	0.000888527
KAT6B	-0.134766	0.00193162	0.011532	-0.186151	1.70132e-05	0.000549435	-0.201876	2.98964e-06	0.000120508
SAA1	0.176459	4.63565e-05	0.00064348	0.159061	0.000246203	0.00343033	0.187486	1.47573e-05	0.000348276
PABPC4L	-0.168951	9.72459e-05	0.00114709	-0.165508	0.000135188	0.00226701	-0.189599	1.17592e-05	0.000296514
PLEC	0.15724	0.000290464	0.00270362	0.175543	5.08281e-05	0.00114968	0.192005	9.05195e-06	0.000249818
NACAD	-0.214026	7.07901e-07	2.57939e-05	-0.147309	0.000693342	0.00672518	-0.150192	0.000541536	0.00449204
JAM3	-0.216457	5.25165e-07	2.09884e-05	-0.141997	0.00108088	0.00920729	-0.15156	0.000480828	0.00410089
RBM5	-0.165292	0.000137974	0.00152083	-0.18152	2.76444e-05	0.000763457	-0.178143	3.90955e-05	0.000695139
TMEM120B	-0.143594	0.000947259	0.00669284	-0.194938	6.55112e-06	0.000299027	-0.185287	1.86432e-05	0.000413208
PVRL1	0.206577	1.72943e-06	4.99419e-05	0.127531	0.00336028	0.020005	0.175647	5.02994e-05	0.000828541
NEURL4	-0.10538	0.0155142	0.0554582	-0.204458	2.21693e-06	0.000158877	-0.205267	2.01692e-06	9.45234e-05
IL20RB	0.177764	4.06291e-05	0.000580952	0.166206	0.000126522	0.00215816	0.17866	3.70886e-05	0.000671308
TM4SF1	0.17399	5.93496e-05	0.000784508	0.130911	0.00260305	0.0169625	0.210705	1.05838e-06	6.34982e-05
BTG1	0.137921	0.00150433	0.00958299	0.219373	3.65386e-07	4.84632e-05	0.164102	0.000154364	0.00184905
BTC	0.20551	1.96053e-06	5.5122e-05	0.144885	0.000850653	0.00776198	0.162676	0.000176405	0.00202255
KLHL18	-0.144991	0.000843139	0.00612735	-0.191695	9.36447e-06	0.000360066	-0.185931	1.74136e-05	0.000392837
ATP8B2	-0.25678	2.21299e-09	3.62384e-07	-0.102475	0.0186188	0.0673481	-0.113376	0.00918925	0.0360312
ENHO	-0.174409	5.6928e-05	0.000759714	-0.16874	9.92442e-05	0.00181046	-0.179298	3.47493e-05	0.000642644
UROD	-0.207385	1.57228e-06	4.63655e-05	-0.14252	0.00103531	0.00893395	-0.161868	0.000190158	0.00213452
GAMT	-0.201239	3.21636e-06	8.13973e-05	-0.153777	0.000395777	0.00465666	-0.160355	0.000218683	0.00235228
NKX6-1	-0.165218	0.000138942	0.0015288	-0.158923	0.000249328	0.00345313	-0.197358	4.99833e-06	0.000170102
BTN2A3P	-0.179237	3.49682e-05	0.000516691	-0.178531	3.75802e-05	0.000937986	-0.163911	0.000157161	0.00187607
TTC33	-0.138587	0.00142606	0.00919377	-0.192096	8.96263e-06	0.00035259	-0.190394	1.07896e-05	0.00028113
GRHL1	0.242962	1.61218e-08	1.59148e-06	0.115201	0.00811709	0.0371406	0.129494	0.00289923	0.0154442
EFNB3	-0.182421	2.51761e-05	0.00039776	-0.126961	0.00350613	0.0206963	-0.202894	2.65832e-06	0.000111133
ANKRD34A	-0.210475	1.08806e-06	3.5803e-05	-0.138557	0.00142949	0.0111855	-0.1607	0.000211853	0.0022967
HACE1	-0.125407	0.00393348	0.0198514	-0.184825	1.95742e-05	0.000600579	-0.208135	1.43858e-06	7.7311e-05
SPATC1L	-0.161216	0.000202	0.00203889	-0.192918	8.18973e-06	0.000337257	-0.168737	9.92813e-05	0.00134157
B2M	0.141994	0.00108114	0.00740573	0.182473	2.50418e-05	0.000717194	0.197039	5.18074e-06	0.000173761
PXN	0.194328	7.00946e-06	0.000150612	0.161052	0.000205087	0.00302088	0.162605	0.000177574	0.00203094
MMACHC	-0.127029	0.00348835	0.0181008	-0.187696	1.44304e-05	0.00048167	-0.203465	2.48804e-06	0.000107217
MARCKSL1	-0.165811	0.000131357	0.00146738	-0.181889	2.66087e-05	0.000754309	-0.17537	5.17192e-05	0.000848914
EZR	0.224549	1.89561e-07	9.36001e-06	0.117991	0.0066938	0.0323623	0.155933	0.000326684	0.00313594
TP53BP1	-0.188126	1.37811e-05	0.000252062	-0.151731	0.000473712	0.00527487	-0.177668	4.10275e-05	0.000722345
MXD4	-0.171043	7.93537e-05	0.000985303	-0.179661	3.34826e-05	0.000871407	-0.171481	7.60226e-05	0.0011281
RAVER1	-0.155943	0.000326387	0.00296042	-0.195818	5.93924e-06	0.00028399	-0.170913	8.0373e-05	0.00116411
CSPG5	-0.138316	0.00145743	0.00935047	-0.148391	0.00063225	0.00635824	-0.227572	1.28271e-07	1.65315e-05
C1QL1	-0.16689	0.00011854	0.0013469	-0.151488	0.000483849	0.00533319	-0.200007	3.70286e-06	0.000138177
SLC25A23	-0.145434	0.000812347	0.00595108	-0.174318	5.74464e-05	0.00125089	-0.19997	3.71863e-06	0.000138395
ANXA3	0.199241	4.04022e-06	9.64594e-05	0.128839	0.00304638	0.0187539	0.18082	2.97204e-05	0.000578998
RABL5	-0.183102	2.34531e-05	0.000375468	-0.164353	0.000150765	0.0024458	-0.171233	7.78934e-05	0.00114768
IL18	0.190728	1.04045e-05	0.000203114	0.143838	0.000928306	0.00826157	0.179687	3.33934e-05	0.000629397
CNKSR1	0.251392	4.86853e-09	6.84496e-07	0.110711	0.0109805	0.0462865	0.114794	0.00834623	0.0336338
FOXQ1	0.192193	8.86797e-06	0.00018152	0.135584	0.00181117	0.0131712	0.183942	2.14791e-05	0.000452751
TCF4	-0.21823	4.2145e-07	1.78276e-05	-0.135597	0.00180941	0.0131712	-0.148933	0.000603541	0.00482419
ARHGEF35	0.232183	6.99511e-08	4.42568e-06	0.111347	0.0105272	0.0449334	0.145953	0.000777663	0.00587319
MAP3K15	-0.130086	0.00277203	0.0152204	-0.192235	8.82752e-06	0.000351524	-0.193986	7.2802e-06	0.000218862
APAF1	-0.179731	3.32437e-05	0.000494358	-0.170311	8.5226e-05	0.00161616	-0.167402	0.000112874	0.0014762
CDC42BPG	0.242136	1.80878e-08	1.72441e-06	0.102388	0.0187195	0.0675543	0.136866	0.00163642	0.0101277
B4GALNT1	-0.221886	2.66219e-07	1.23517e-05	-0.144226	0.000898739	0.00807588	-0.134091	0.00203627	0.0119188
VDR	0.177854	4.02576e-05	0.000576487	0.156444	0.000312024	0.00399179	0.182035	2.62073e-05	0.000521859
UBP1	-0.16259	0.000177822	0.00185472	-0.179564	3.38176e-05	0.000874921	-0.17726	4.2755e-05	0.000742954
PRR15	0.23303	6.24922e-08	4.12241e-06	0.129237	0.0029563	0.0183781	0.128951	0.00302081	0.0159328
COLEC12	-0.224452	1.91954e-07	9.37476e-06	-0.114898	0.00828719	0.0377576	-0.154494	0.000371416	0.0034419
EFEMP2	-0.240196	2.36555e-08	2.09721e-06	-0.120228	0.00571872	0.0291251	-0.124747	0.00412873	0.0200656
ZNF682	-0.168835	9.83453e-05	0.00115712	-0.181058	2.89988e-05	0.00078989	-0.168721	9.94269e-05	0.00134157
RIC8B	-0.198605	4.34221e-06	0.000102093	-0.152665	0.000436498	0.00498001	-0.159822	0.000229657	0.00243458
KRT18	0.237269	3.53084e-08	2.79237e-06	0.104114	0.0168068	0.0628254	0.142907	0.00100275	0.00711381
TBC1D2	0.186157	1.70012e-05	0.000295076	0.142935	0.00100044	0.00871405	0.182993	2.37218e-05	0.000486278
RNF216P1	-0.18475	1.97295e-05	0.000328094	-0.138356	0.00145284	0.0113226	-0.187764	1.43255e-05	0.000342225
PARP1	-0.126387	0.00365879	0.0187368	-0.183984	2.13843e-05	0.000636001	-0.203406	2.50524e-06	0.000107625
THY1	-0.192815	8.28272e-06	0.000173082	-0.154181	0.000381872	0.00457557	-0.165794	0.000131566	0.00163945
TEX15	-0.127447	0.00338157	0.0176284	-0.198204	4.54389e-06	0.000249986	-0.18963	1.17203e-05	0.000296144
FADD	0.130208	0.00274645	0.0151218	0.180939	2.9358e-05	0.000797203	0.203171	2.57456e-06	0.000109254
CEND1	-0.186066	1.71668e-05	0.000297194	-0.162171	0.000184887	0.0028125	-0.16602	0.000128773	0.00161951
SP100	0.104737	0.0161587	0.0572151	0.209584	1.21065e-06	0.00010802	0.193871	7.37299e-06	0.000219492
ATP7B	-0.132999	0.00221679	0.0128031	-0.184797	1.96324e-05	0.00060058	-0.196737	5.3594e-06	0.000178037
PCDH10	-0.198902	4.19854e-06	9.97261e-05	-0.175	5.36662e-05	0.00119326	-0.134565	0.00196225	0.0115584
MEAF6	-0.135226	0.00186303	0.0112355	-0.188389	1.33962e-05	0.000459266	-0.190983	1.01203e-05	0.000268825
CD9	0.214879	6.37714e-07	2.40006e-05	0.122061	0.00501719	0.0265126	0.161513	0.000196523	0.00218482
COPS3	-0.173507	6.22617e-05	0.000812965	-0.159374	0.000239271	0.00335728	-0.182294	2.55123e-05	0.000511105
FUT3	0.21376	7.31166e-07	2.63656e-05	0.137557	0.00154876	0.0118969	0.150251	0.000538773	0.00447634
FERMT1	0.211095	1.00984e-06	3.37884e-05	0.10732	0.0137028	0.0543814	0.176748	4.50289e-05	0.000769309
YWHAZ	0.193675	7.53407e-06	0.000159858	0.172725	6.72733e-05	0.00138109	0.14455	0.00087479	0.00642883
TRPC1	-0.226095	1.55344e-07	8.12867e-06	-0.123238	0.00460831	0.0250853	-0.143193	0.000979338	0.00700358
ATP2C2	0.23536	4.57228e-08	3.32677e-06	0.107083	0.0139139	0.0549636	0.141187	0.00115509	0.00790444
CASKIN1	-0.162149	0.000185269	0.00191161	-0.164963	0.000142339	0.0023422	-0.188427	1.33422e-05	0.000326954
SLX1B	0.186313	1.67231e-05	0.000291797	0.172761	6.70337e-05	0.0013782	0.153661	0.000399829	0.00364249
SSH3	0.242055	1.82909e-08	1.73192e-06	0.0910208	0.0367173	0.108208	0.141132	0.00116021	0.00792618
IPP	-0.169263	9.43593e-05	0.00111683	-0.162577	0.000178034	0.00275647	-0.183152	2.33308e-05	0.000482529
BCAR3	0.131371	0.00251318	0.0141166	0.186002	1.72833e-05	0.000555581	0.195868	5.90637e-06	0.000190534
SLFN5	0.0883758	0.0425655	0.116749	0.17875	3.67525e-05	0.000925059	0.229382	1.01254e-07	1.39541e-05
ZNF124	-0.0928364	0.0331106	0.0974915	-0.219128	3.7676e-07	4.94729e-05	-0.188938	1.26289e-05	0.00031278
RNGTT	-0.115964	0.00770326	0.0330421	-0.196569	5.46143e-06	0.000269566	-0.197397	4.97663e-06	0.000169779
SEC22C	-0.208694	1.34618e-06	4.14547e-05	-0.131584	0.0024724	0.0163174	-0.160911	0.000207778	0.00227006
ZKSCAN8	-0.139474	0.00132771	0.00868031	-0.183119	2.34114e-05	0.000680299	-0.191419	9.65117e-06	0.000261861
STK24	0.186778	1.59159e-05	0.000281848	0.166793	0.000119638	0.00206862	0.158381	0.000261935	0.00265928
SAT2	-0.186532	1.63374e-05	0.000286759	-0.143781	0.000932684	0.0082888	-0.179046	3.5657e-05	0.000653777
TMC4	0.229634	9.79605e-08	5.77759e-06	0.109578	0.0118311	0.0488947	0.146892	0.000718335	0.00551793
SCN8A	-0.16543	0.000136186	0.00150682	-0.165174	0.000139526	0.00231955	-0.183686	2.20614e-05	0.000461071
CNTROB	-0.146985	0.000712722	0.00537399	-0.173645	6.1418e-05	0.00130317	-0.193118	8.01128e-06	0.000232273
DPF1	-0.179769	3.31131e-05	0.000493999	-0.169317	9.38605e-05	0.00173269	-0.163658	0.000160941	0.00190325
TAMM41	-0.115337	0.00804209	0.0341274	-0.170215	8.60268e-05	0.00162913	-0.220212	3.28867e-07	2.95323e-05
SQRDL	0.150855	0.000511289	0.00416909	0.158383	0.000261885	0.00354159	0.20273	2.70925e-06	0.000112232
BAP1	-0.166948	0.000117882	0.00134272	-0.16223	0.00018388	0.00280182	-0.184231	2.08365e-05	0.000445505
SSFA2	0.126569	0.00360979	0.0185542	0.190145	1.10844e-05	0.000406009	0.193487	7.69211e-06	0.000225403
UHRF1BP1L	-0.183141	2.33565e-05	0.000375403	-0.15517	0.000349731	0.004306	-0.172433	6.92321e-05	0.00105201
CYB5D1	-0.14365	0.0009429	0.00666881	-0.190965	1.01403e-05	0.000377386	-0.178538	3.75529e-05	0.000677949
HSD17B14	-0.178105	3.92438e-05	0.00056371	-0.120808	0.00548761	0.0283106	-0.203174	2.5736e-06	0.000109254
ZNF570	-0.17019	8.62367e-05	0.00105384	-0.157112	0.000293821	0.00382214	-0.184267	2.07577e-05	0.000444503
ARHGAP27	0.23933	2.66458e-08	2.31802e-06	0.109016	0.0122747	0.0501324	0.129135	0.00297915	0.0157969
PPAP2C	0.168422	0.000102336	0.00119398	0.147882	0.000660351	0.00654194	0.192661	8.4244e-06	0.000237848
ADSL	-0.182454	2.50903e-05	0.000396855	-0.170558	8.32062e-05	0.00159086	-0.156914	0.000299109	0.00294646
TBKBP1	-0.181934	2.64829e-05	0.000414641	-0.158159	0.000267279	0.00358304	-0.169411	9.30116e-05	0.00127174
NQO1	0.17669	4.52901e-05	0.000631657	0.175417	5.14762e-05	0.00115378	0.158692	0.000254622	0.00261363
ADD1	-0.194038	7.2378e-06	0.000154041	-0.145258	0.000824476	0.00761	-0.165954	0.000129584	0.00162564
SLC25A51	-0.189943	1.13302e-05	0.000216925	-0.154098	0.000384677	0.00458559	-0.163293	0.000166528	0.00194618
PPM1M	-0.213716	7.35169e-07	2.63732e-05	-0.130183	0.00275159	0.0175363	-0.150979	0.000505798	0.00426679
MPZL3	0.203668	2.43037e-06	6.50543e-05	0.125587	0.00388162	0.0222338	0.168397	0.000102587	0.00137035
ZNF737	-0.165226	0.000138837	0.0015288	-0.187066	1.54337e-05	0.000507854	-0.158836	0.000251312	0.00258684
NADSYN1	0.211188	9.98675e-07	3.35762e-05	0.1374	0.00156836	0.011988	0.148446	0.000629318	0.00499116
BOLA3-AS1	-0.201607	3.08325e-06	7.84567e-05	-0.136813	0.00164341	0.0123403	-0.162113	0.000185883	0.0021035
KCTD7	-0.205345	1.99881e-06	5.56427e-05	-0.119295	0.00610869	0.0304974	-0.170405	8.44529e-05	0.00120194
SLC37A1	0.2238	2.08648e-07	9.97998e-06	0.118225	0.00658545	0.0319717	0.144623	0.000869459	0.00640038
SAFB	-0.129702	0.00285407	0.0155433	-0.184755	1.97186e-05	0.000601035	-0.193873	7.37166e-06	0.000219492
AP4B1-AS1	-0.180371	3.11284e-05	0.000470952	-0.157022	0.000296221	0.00384259	-0.171078	7.90811e-05	0.00115502
KRTCAP3	0.237451	3.44442e-08	2.77126e-06	0.118339	0.00653278	0.0317677	0.121591	0.00518935	0.02376
DFFB	-0.0932662	0.0323025	0.095749	-0.220375	3.22222e-07	4.5303e-05	-0.183167	2.32945e-05	0.000482494
CEP68	-0.160098	0.000223921	0.00221833	-0.173447	6.26336e-05	0.00131891	-0.177787	4.05349e-05	0.000716366
CD47	0.149807	0.00055985	0.00445543	0.192129	8.92994e-06	0.00035259	0.168717	9.94685e-05	0.00134157
MAP3K7	-0.129708	0.00285268	0.0155433	-0.194078	7.20644e-06	0.000315429	-0.184579	2.00876e-05	0.000432816
GTPBP3	-0.12225	0.00494938	0.0237611	-0.197756	4.77941e-06	0.000251427	-0.187141	1.53122e-05	0.000357601
WRB	-0.149989	0.000551119	0.00441157	-0.197847	4.7305e-06	0.000251427	-0.16344	0.000164253	0.0019297
PROSER2	0.199656	3.85386e-06	9.34528e-05	0.125287	0.00396808	0.0225344	0.172877	6.62671e-05	0.00102
DDN	-0.132615	0.0022837	0.0130773	-0.206711	1.70236e-06	0.000134631	-0.169968	8.81161e-05	0.00122673
GTF2H2B	-0.154849	0.000359855	0.00317215	-0.172854	6.64201e-05	0.00137166	-0.182608	2.46933e-05	0.000499574
BMPR1APS2	-0.144902	0.000849448	0.00615806	-0.197414	4.96706e-06	0.000254178	-0.168135	0.000105208	0.00139865
SMG6	-0.182583	2.4757e-05	0.000392922	-0.172622	6.7958e-05	0.00138533	-0.151823	0.000469922	0.00403258
LIX1L	-0.244254	1.3458e-08	1.44094e-06	-0.116265	0.0075454	0.0352313	-0.109506	0.0118872	0.0433135
PALD1	-0.115705	0.00784182	0.0334406	-0.204424	2.22581e-06	0.000158877	-0.185051	1.91128e-05	0.000418288
ZFYVE20	-0.13217	0.00236341	0.0134271	-0.147564	0.000678471	0.0066411	-0.222243	2.54442e-07	2.55536e-05
EID2B	-0.182041	2.61922e-05	0.000411478	-0.152603	0.000438901	0.00500333	-0.171563	7.54162e-05	0.00112149
CACNA1H	-0.142804	0.00101129	0.00702054	-0.192034	9.02358e-06	0.000352685	-0.173595	6.17246e-05	0.000964247
EP400NL	-0.138581	0.00142672	0.00919377	-0.187227	1.51712e-05	0.000502782	-0.181915	2.65377e-05	0.000526761
FGD1	-0.198011	4.64374e-06	0.000107727	-0.131387	0.00250993	0.0165259	-0.168383	0.00010272	0.00137072
ATN1	-0.181828	2.67761e-05	0.00041829	-0.157803	0.000276029	0.00366101	-0.165758	0.000132023	0.00164368
DOK1	-0.186166	1.6985e-05	0.000295076	-0.17194	7.26774e-05	0.00145682	-0.145931	0.000779082	0.00587753
SIRT1	-0.134263	0.00200911	0.0118696	-0.181594	2.74344e-05	0.000762128	-0.190172	1.1052e-05	0.000283302
TMEM237	-0.194148	7.15075e-06	0.00015289	-0.153701	0.000398425	0.00468384	-0.153806	0.000394741	0.00362189
E2F5	-0.121442	0.00524492	0.0247359	-0.179657	3.3494e-05	0.000871407	-0.201726	3.04149e-06	0.000120611
GABPA	-0.138569	0.00142815	0.00919871	-0.205195	2.03406e-06	0.000151705	-0.163818	0.000158533	0.00188408
TMPRSS11E	0.158398	0.000261536	0.00248656	0.174839	5.45361e-05	0.0012049	0.174734	5.51127e-05	0.000890957
GNAZ	-0.159754	0.000231088	0.00226835	-0.173168	6.43933e-05	0.00134376	-0.174935	5.40162e-05	0.000880865
DOT1L	-0.164274	0.000151889	0.00163254	-0.170371	8.4736e-05	0.00161317	-0.172845	6.64764e-05	0.00102129
TNFAIP3	0.138784	0.00140369	0.00907474	0.170692	8.21258e-05	0.00157814	0.196117	5.74451e-06	0.000187944
PPP1R8	-0.126593	0.00360331	0.0185345	-0.179024	3.57361e-05	0.00090603	-0.198021	4.63849e-06	0.000161408
COASY	0.178509	3.76664e-05	0.000547114	0.126302	0.00368178	0.0214567	0.192897	8.20868e-06	0.000234613
C2orf44	-0.176123	4.79547e-05	0.000658916	-0.176219	4.74925e-05	0.00111852	-0.153178	0.000417246	0.00374446
RASSF5	0.191979	9.07834e-06	0.000184469	0.145653	0.000797552	0.00742053	0.162714	0.000175782	0.00201847
HABP4	-0.180816	2.97325e-05	0.000453779	-0.135774	0.00178428	0.0130644	-0.183487	2.2526e-05	0.000467968
IFI27	0.174274	5.76952e-05	0.00076701	0.171663	7.46812e-05	0.00147656	0.159723	0.000231749	0.00245488
CCDC74B	-0.178501	3.76954e-05	0.000547114	-0.154899	0.000358269	0.00438203	-0.170852	8.0852e-05	0.0011662
BAIAP2	0.208533	1.37216e-06	4.18054e-05	0.135323	0.00184885	0.0133627	0.148283	0.000638143	0.00504677
BRK1	-0.120231	0.00571737	0.0266421	-0.1863	1.6746e-05	0.000542063	-0.195395	6.22599e-06	0.000196954
ZNF695	-0.0920138	0.0347054	0.10068	-0.213461	7.58372e-07	7.8191e-05	-0.186816	1.58516e-05	0.000365901
CNN3	-0.218322	4.16659e-07	1.77354e-05	-0.103405	0.0175704	0.0645313	-0.159051	0.000246423	0.00255777
ZNF287	-0.182025	2.62348e-05	0.000411682	-0.138732	0.00140956	0.0110971	-0.179184	3.51563e-05	0.000646421
XDH	0.164791	0.00014467	0.00157195	0.145805	0.000787396	0.00736049	0.191599	9.46269e-06	0.000258765
SLC7A5	0.163422	0.000164524	0.00174278	0.178617	3.72524e-05	0.000935543	0.164182	0.00015321	0.00183997
USP19	-0.112488	0.00975474	0.0390836	-0.164062	0.000154941	0.00248921	-0.219523	3.58574e-07	3.11937e-05
OVOL1	0.233855	5.5968e-08	3.87865e-06	0.118336	0.00653429	0.0317677	0.120893	0.0054546	0.0246459
MAST1	-0.150713	0.000517596	0.00420527	-0.173929	5.9709e-05	0.001283	-0.181112	2.8837e-05	0.000563739
DAPK3	-0.220193	3.29676e-07	1.49471e-05	-0.12808	0.00322522	0.0193917	-0.135947	0.0017601	0.0107028
RBAK-RBAKDN	-0.159599	0.000234402	0.00228796	-0.146741	0.00072757	0.00695062	-0.195517	6.14252e-06	0.0001952
C19orf33	0.190659	1.04835e-05	0.000203799	0.13479	0.00192787	0.013754	0.17164	7.48514e-05	0.00111548
SDF2	0.0766564	0.0787184	0.182188	0.17728	4.26698e-05	0.00103291	0.227193	1.34741e-07	1.6896e-05
THBD	0.129937	0.00280368	0.0153538	0.147935	0.000657391	0.0065219	0.219251	3.71025e-07	3.18784e-05
CD46	0.224546	1.89635e-07	9.36001e-06	0.100299	0.0212869	0.0739067	0.149615	0.000569185	0.00463304
SNRNP40	-0.123041	0.00467478	0.0226956	-0.171528	7.56744e-05	0.00148491	-0.205166	2.04095e-06	9.53288e-05
RANBP3	-0.175033	5.34901e-05	0.000722143	-0.155227	0.000347938	0.00430485	-0.172595	6.81419e-05	0.00103885
CDIP1	-0.189732	1.15921e-05	0.000220425	-0.145945	0.000778178	0.00730375	-0.162776	0.000174768	0.00201374
HTT	-0.15742	0.000285764	0.00266592	-0.147208	0.00069931	0.00676421	-0.19658	5.45422e-06	0.000180326
GTF2H2	-0.152555	0.000440767	0.00369418	-0.172476	6.89409e-05	0.00139678	-0.179502	3.40329e-05	0.000635531
SV2A	-0.21762	4.54667e-07	1.88349e-05	-0.104374	0.0165335	0.0621727	-0.157644	0.000280028	0.00280209
HAUS1	-0.147941	0.000657061	0.00504726	-0.191533	9.53188e-06	0.000362498	-0.164557	0.000147892	0.00179625
DEF6	0.226153	1.5419e-07	8.09877e-06	0.0995407	0.022292	0.0763446	0.147476	0.000683617	0.00532174
ERMP1	0.228132	1.19243e-07	6.83021e-06	0.106233	0.014693	0.057041	0.140042	0.00126791	0.00848914
AZI2	-0.180459	3.08473e-05	0.000467922	-0.140179	0.00125398	0.0102671	-0.178263	3.86182e-05	0.000690022
ZNF566	-0.1366	0.00167136	0.0103902	-0.166499	0.000123043	0.00211959	-0.198904	4.19758e-06	0.000150583
MEIS3	-0.213956	7.13904e-07	2.59339e-05	-0.111447	0.0104574	0.0446903	-0.157245	0.000290318	0.00287816
ILDR1	0.230678	8.53801e-08	5.21231e-06	0.116941	0.00720075	0.0340909	0.125795	0.00382261	0.018876
TCF12	-0.234082	5.42873e-08	3.81629e-06	-0.0965767	0.0266244	0.0864037	-0.136698	0.00165847	0.0102233
TRRAP	-0.139114	0.00136688	0.00889044	-0.196193	5.69563e-06	0.000278167	-0.168374	0.000102811	0.00137072
MYO5C	0.22585	1.60343e-07	8.32765e-06	0.112511	0.00973983	0.0424847	0.137849	0.0015131	0.00958615
SDC1	0.159478	0.000236997	0.00230683	0.132052	0.00238491	0.0158603	0.205536	1.95455e-06	9.31691e-05
C1QTNF6	0.17043	8.42458e-05	0.00103623	0.155699	0.000333596	0.00418317	0.176152	4.78155e-05	0.000797205
LARS2	-0.125133	0.00401331	0.020164	-0.195679	6.03209e-06	0.000286555	-0.180345	3.12109e-05	0.000598073
RSU1	-0.194325	7.01175e-06	0.000150612	-0.15149	0.000483798	0.00533319	-0.150717	0.000517439	0.00434655
SIX5	-0.159734	0.000231507	0.0022699	-0.164208	0.000152829	0.00247064	-0.179638	3.35594e-05	0.000631234
POLR3A	-0.146916	0.000716901	0.00539511	-0.196282	5.63967e-06	0.000276403	-0.160181	0.000222215	0.00237924
ARIH2	-0.119814	0.00588889	0.0272408	-0.161647	0.000194104	0.00290197	-0.214976	6.30166e-07	4.50415e-05
FBXO42	-0.17265	6.77678e-05	0.000870165	-0.126861	0.00353244	0.020781	-0.195202	6.36153e-06	0.00019809
ARF6	0.156386	0.000313662	0.00286451	0.156194	0.000319124	0.00406023	0.189114	1.23913e-05	0.000308913
LAD1	0.235333	4.58898e-08	3.32677e-06	0.0907751	0.0372301	0.109303	0.137237	0.00158883	0.00991743
POLR2A	-0.0953	0.0287032	0.0878839	-0.19266	8.42465e-06	0.000341874	-0.20185	2.99839e-06	0.000120508
ASPH	0.145454	0.000810992	0.00594668	0.138966	0.00138323	0.0109863	0.212535	8.48606e-07	5.55486e-05
CDK4	-0.194355	6.98881e-06	0.000150584	-0.155551	0.00033803	0.00421976	-0.146393	0.000749309	0.00571487
EPS15L1	-0.184876	1.94692e-05	0.000325712	-0.157284	0.000289286	0.0037915	-0.156829	0.000301407	0.00295649
MATR3	-0.153717	0.000397856	0.00343108	-0.179382	3.44527e-05	0.000888052	-0.170428	8.42601e-05	0.00120043
TRAF3IP2	0.137164	0.00159809	0.0100482	0.195342	6.26331e-06	0.000294523	0.169877	8.89077e-05	0.00123627
PKIG	-0.197971	4.66465e-06	0.000108032	-0.130469	0.00269242	0.0173098	-0.163209	0.000167845	0.00195829
VWA1	0.219551	3.57344e-07	1.56226e-05	0.0997111	0.0220626	0.075806	0.155982	0.000325226	0.00312842
BBS9	-0.216196	5.42371e-07	2.1386e-05	-0.110269	0.0113058	0.0472002	-0.15338	0.000409876	0.00369021
KCTD5	0.144016	0.000914618	0.00650847	0.151679	0.00047587	0.00529044	0.203332	2.5269e-06	0.000108221
PCNT	-0.152972	0.000424888	0.00359191	-0.175538	5.08565e-05	0.00114968	-0.174383	5.70759e-05	0.00091001
LYRM2	-0.0974089	0.0253403	0.0799074	-0.179747	3.31875e-05	0.000868302	-0.212521	8.5005e-07	5.55486e-05
OAS2	0.136628	0.00166767	0.0103765	0.18784	1.42093e-05	0.000476577	0.176528	4.60384e-05	0.000782429
TOP3A	-0.16228	0.000183034	0.00189135	-0.176105	4.80416e-05	0.00112189	-0.164274	0.000151882	0.00183153
C2orf54	0.209202	1.26707e-06	3.96323e-05	0.0793144	0.0688622	0.169675	0.180561	3.0523e-05	0.000588974
SLITRK5	-0.152163	0.000456154	0.0037986	-0.152958	0.0004254	0.00490567	-0.194333	7.00538e-06	0.000212591
MREG	0.164927	0.000142823	0.00155674	0.153821	0.000394212	0.00464985	0.181413	2.79545e-05	0.000549575
SMIM8	-0.122203	0.00496613	0.0238092	-0.191312	9.76374e-06	0.000369298	-0.183936	2.1493e-05	0.000452751
CASP8AP2	-0.0986577	0.0235137	0.0756559	-0.201673	3.06e-06	0.000197186	-0.191134	9.95527e-06	0.000267505
PRKD3	-0.196628	5.42501e-06	0.000121595	-0.139876	0.00128512	0.0104276	-0.155838	0.000329475	0.00316019
FZD8	-0.25004	5.91726e-09	7.99635e-07	-0.107376	0.0136535	0.0542359	-0.092099	0.0345372	0.0942266
ZBED2	0.173055	6.51142e-05	0.000843878	0.152265	0.000452114	0.0051038	0.173802	6.04708e-05	0.000948996
DNAJB5	-0.206211	1.80573e-06	5.18225e-05	-0.137514	0.00155405	0.0119204	-0.14382	0.000929656	0.00671853
MUC1	0.220966	2.99073e-07	1.36934e-05	0.113563	0.00907344	0.0403682	0.141815	0.00109711	0.00760815
RPAP2	-0.111564	0.0103759	0.0408432	-0.195599	6.08622e-06	0.000288143	-0.187142	1.53091e-05	0.000357601
HIC2	-0.110412	0.0111994	0.043301	-0.188794	1.28263e-05	0.000447443	-0.19372	7.49717e-06	0.000221087
ARHGEF10	-0.198729	4.28193e-06	0.000101017	-0.163041	0.000170492	0.00267314	-0.128937	0.00302396	0.0159433
THRAP3	-0.143411	0.000961751	0.00677803	-0.165497	0.000135327	0.00226701	-0.190344	1.08478e-05	0.00028113
PRPF8	-0.112092	0.0100166	0.039823	-0.213581	7.47362e-07	7.8191e-05	-0.168188	0.000104664	0.00139408
PHF21A	-0.181743	2.70153e-05	0.000420141	-0.147446	0.000685338	0.00668481	-0.1666	0.000121864	0.00155654
IFT172	-0.185454	1.83161e-05	0.000310905	-0.135014	0.00189434	0.0136054	-0.172665	6.76729e-05	0.00103583
SIRT7	0.229383	1.01248e-07	5.94627e-06	0.097532	0.0251549	0.0830679	0.139087	0.00136984	0.00898952
HNRNPA0	-0.119768	0.00590818	0.0272804	-0.188013	1.39488e-05	0.000471245	-0.187638	1.452e-05	0.000345477
TMEM159	0.165626	0.000133687	0.00148506	0.164459	0.000149273	0.00242725	0.169685	9.05761e-05	0.00125072
CEP112	-0.189178	1.23067e-05	0.00023211	-0.128839	0.00304628	0.0187539	-0.172524	6.86162e-05	0.00104493
PGBD1	-0.20984	1.17405e-06	3.75669e-05	-0.128768	0.00306277	0.0188236	-0.144514	0.000877407	0.00643816
SLC25A42	-0.143865	0.000926171	0.0065758	-0.184706	1.982e-05	0.000601035	-0.171133	7.86596e-05	0.00115365
TMEM59L	-0.187444	1.48243e-05	0.000265559	-0.143919	0.000922045	0.00822689	-0.162209	0.000184245	0.00208836
DDHD2	-0.15426	0.00037918	0.0033069	-0.191386	9.68568e-06	0.000367343	-0.153066	0.000421379	0.00375973
OAS3	0.195683	6.02979e-06	0.000132799	0.158757	0.000253121	0.00347455	0.137264	0.00158544	0.00991365
KDELC1	-0.232205	6.97498e-08	4.42568e-06	-0.11266	0.00964306	0.0422347	-0.120929	0.00544052	0.0246025
ZNF407	-0.186657	1.6122e-05	0.000284642	-0.156447	0.000311948	0.00399179	-0.151639	0.000477544	0.00407537
RAB11FIP3	-0.17748	4.18139e-05	0.000594492	-0.166262	0.000125847	0.00215192	-0.153513	0.000405105	0.00366862
EPB41	-0.100088	0.0215628	0.0709532	-0.194155	7.14508e-06	0.00031373	-0.194456	6.91087e-06	0.000211412
TGIF2	-0.131115	0.00256281	0.0143375	-0.20517	2.04013e-06	0.000151705	-0.161443	0.000197801	0.00219081
RBBP9	-0.145484	0.000808984	0.00593582	-0.197447	4.94852e-06	0.000254164	-0.155831	0.000329664	0.00316019
ZSCAN18	-0.150756	0.000515689	0.00419268	-0.181556	2.75415e-05	0.000762128	-0.166848	0.000119009	0.00153406
MYO1D	0.204594	2.18198e-06	5.92027e-05	0.134315	0.0020009	0.0141005	0.145935	0.000778828	0.00587753
SULT2B1	0.229803	9.58061e-08	5.69132e-06	0.101399	0.0198993	0.0704781	0.133527	0.00212781	0.0122892
PIN1	-0.191117	9.97334e-06	0.000198881	-0.126032	0.00375607	0.0217603	-0.171222	7.79747e-05	0.00114768
DHX32	0.172865	6.63496e-05	0.000855111	0.152525	0.000441919	0.0050295	0.171019	7.95415e-05	0.00115689
MSI1	-0.136128	0.00173505	0.0106576	-0.176124	4.79488e-05	0.00112189	-0.185142	1.893e-05	0.00041625
TJP3	0.228619	1.11893e-07	6.51648e-06	0.0962008	0.0272226	0.0878532	0.139494	0.00132555	0.0087859
MROH6	0.216293	5.35918e-07	2.11916e-05	0.118963	0.00625299	0.0309511	0.141603	0.00111636	0.00769616
ARMC9	-0.186176	1.69674e-05	0.000295076	-0.121286	0.00530369	0.0275764	-0.179453	3.42043e-05	0.000636484
HCP5	0.182154	2.58872e-05	0.000407169	0.131792	0.00243318	0.0160967	0.176285	4.71803e-05	0.000793118
TMCC2	-0.185686	1.78718e-05	0.00030485	-0.102455	0.018642	0.0673968	-0.191837	9.21956e-06	0.000253611
FOXO3B	-0.16545	0.000135933	0.00150521	-0.181274	2.83588e-05	0.000777019	-0.150091	0.000546254	0.0045204
INSR	-0.114677	0.00841304	0.0352184	-0.179539	3.39011e-05	0.000875454	-0.197138	5.12339e-06	0.000172714
IL1RN	0.213729	7.33952e-07	2.63732e-05	0.123563	0.004501	0.0247138	0.140482	0.00122344	0.00824253
KRT4	0.200393	3.54355e-06	8.69889e-05	0.147276	0.000695299	0.00673478	0.138691	0.00141417	0.00917435
CALM3	-0.135148	0.00187442	0.0112879	-0.15311	0.000419757	0.00486477	-0.204644	2.16947e-06	9.83612e-05
MAGED2	-0.213467	7.578e-07	2.69765e-05	-0.110987	0.0107812	0.0457268	-0.150594	0.000522978	0.0043825
ZNF35	-0.151853	0.000468694	0.00387857	-0.184403	2.04625e-05	0.000615156	-0.160864	0.000208675	0.00227396
FSD1L	-0.17001	8.77602e-05	0.0010622	-0.156549	0.000309099	0.00397231	-0.169084	9.60058e-05	0.00130754
FAM104B	-0.18503	1.91559e-05	0.000322018	-0.146778	0.00072533	0.00693398	-0.159549	0.000235463	0.00248854
CDC7	-0.116125	0.00761835	0.0327896	-0.191111	9.9804e-06	0.00037444	-0.183952	2.14556e-05	0.000452751
ZNF414	-0.183879	2.16217e-05	0.00035158	-0.152718	0.000434467	0.00496091	-0.155671	0.00033442	0.00319697
KRT8P3	0.23297	6.2992e-08	4.12409e-06	0.0915005	0.0357333	0.106344	0.132867	0.00223955	0.0127253
HCFC1	-0.130278	0.00273188	0.0150594	-0.181575	2.74899e-05	0.000762128	-0.182978	2.37583e-05	0.000486311
ZNF347	-0.161538	0.000196072	0.00199206	-0.151082	0.0005013	0.00546157	-0.18223	2.56823e-05	0.000513609
C18orf54	-0.187732	1.43744e-05	0.000259503	-0.130081	0.00277303	0.0176085	-0.169991	8.79191e-05	0.00122642
RHOQ	-0.21509	6.21376e-07	2.35666e-05	-0.0967441	0.0263616	0.0858969	-0.157798	0.000276151	0.00277225
TXLNA	-0.154908	0.000357989	0.0031617	-0.147646	0.000673747	0.00661346	-0.191014	1.00868e-05	0.000268741
UBTF	-0.168303	0.000103518	0.00120373	-0.173926	5.97301e-05	0.001283	-0.153653	0.000400128	0.00364249
FOXN3	-0.145016	0.000841386	0.00612193	-0.172968	6.56785e-05	0.00136038	-0.178442	3.79231e-05	0.000681979
DPYSL5	-0.157841	0.000275086	0.00259061	-0.151122	0.000499517	0.00545744	-0.185472	1.82816e-05	0.000409102
WRN	-0.129449	0.00290922	0.0157439	-0.215649	5.80179e-07	6.78615e-05	-0.14717	0.000701589	0.00542222
AP4B1	-0.190554	1.06035e-05	0.000205558	-0.138565	0.00142867	0.0111855	-0.15923	0.000242438	0.00253912
ZNRF3	-0.113535	0.00909112	0.0371519	-0.209274	1.25619e-06	0.00010905	-0.167535	0.000111437	0.00146192
FAM115B	-0.160986	0.000206338	0.00207515	-0.179915	3.26197e-05	0.000861544	-0.15478	0.000362096	0.00338188
MBOAT1	0.212039	9.01157e-07	3.09709e-05	0.146573	0.000738017	0.00703593	0.118532	0.00644511	0.0278947
PTPN6	0.233198	6.1103e-08	4.08891e-06	0.0741384	0.0890829	0.202933	0.142393	0.00104623	0.00735481
ENAH	-0.198572	4.35876e-06	0.00010231	-0.135331	0.00184766	0.0133627	-0.150246	0.000539001	0.00447634
SEPT5	-0.192149	8.9108e-06	0.000182128	-0.140136	0.00125828	0.0102842	-0.155119	0.000351322	0.0032974
SAMD11	-0.159195	0.000243216	0.00234645	-0.173934	5.96824e-05	0.001283	-0.162029	0.000187349	0.00211322
DYNC2H1	-0.171414	7.6525e-05	0.000962196	-0.160581	0.000214191	0.00310879	-0.161922	0.000189216	0.00212752
ADAMTS10	-0.199372	3.98038e-06	9.53579e-05	-0.133515	0.00212981	0.0146611	-0.149758	0.000562186	0.00459488
DCTN1	-0.21631	5.34732e-07	2.11916e-05	-0.11911	0.00618888	0.0307897	-0.137356	0.00157383	0.00986185
FAM25HP	0.170882	8.06114e-05	0.000998247	0.143907	0.000922933	0.00822899	0.176475	4.62824e-05	0.000783704
C2CD5	-0.097441	0.0252918	0.0798087	-0.220018	3.36974e-07	4.64391e-05	-0.164933	0.000142742	0.00174743
LHX2	-0.118367	0.00652018	0.0292488	-0.171663	7.4682e-05	0.00147656	-0.198879	4.2097e-06	0.000150629
SUV39H2	-0.112752	0.00958337	0.0385746	-0.19246	8.61221e-06	0.000346455	-0.182886	2.39866e-05	0.000489545
MKX	-0.121578	0.00519388	0.0245563	-0.203221	2.55958e-06	0.000172111	-0.166575	0.000122148	0.00155654
BCLAF1	-0.125307	0.00396223	0.0199531	-0.192065	8.99269e-06	0.00035259	-0.173901	5.98788e-05	0.000941755
IER3	0.170809	8.11875e-05	0.00100271	0.156002	0.000324659	0.00410024	0.166042	0.000128506	0.00161871
SCAP	-0.126729	0.00356705	0.0184075	-0.173106	6.47841e-05	0.0013499	-0.191003	1.00978e-05	0.000268741
TIA1	-0.133625	0.00211162	0.0123042	-0.186342	1.66716e-05	0.000540914	-0.173058	6.50975e-05	0.00100565
ZMYM3	-0.151525	0.000482295	0.00396988	-0.166971	0.000117626	0.00204911	-0.175694	5.00651e-05	0.000825659
MAST4	0.172301	7.01394e-05	0.00089484	0.126617	0.003597	0.0210639	0.186945	1.56349e-05	0.0003621
TMC6	0.211487	9.63251e-07	3.27204e-05	0.103029	0.017988	0.0656634	0.15566	0.000334763	0.00319805
BLCAP	0.193755	7.46841e-06	0.000158707	0.140119	0.00126004	0.0102865	0.151142	0.000498652	0.004227
GPR173	-0.199315	4.00654e-06	9.58197e-05	-0.148253	0.000639779	0.00640193	-0.135079	0.00188461	0.0112556
LGALS3BP	0.13359	0.00211734	0.0123208	0.196632	5.42282e-06	0.000268613	0.16165	0.000194044	0.00216479
C15orf48	0.179933	3.25593e-05	0.000488354	0.163876	0.000157682	0.00251983	0.145921	0.000779756	0.00587943
PRKACA	-0.163263	0.000167001	0.00176365	-0.146896	0.000718076	0.00689304	-0.180363	3.11515e-05	0.000598066
GNL1	-0.148606	0.00062075	0.00481816	-0.144872	0.000851537	0.00776198	-0.195568	6.10749e-06	0.000194531
SAP30	-0.213938	7.1547e-07	2.59339e-05	-0.127305	0.00341759	0.0202682	-0.131307	0.00252534	0.0139707
PRRG2	0.232956	6.31102e-08	4.12409e-06	0.0917308	0.035269	0.105458	0.127606	0.00334165	0.0171191
GNB3	-0.217445	4.64668e-07	1.90788e-05	-0.134303	0.00200278	0.0141005	-0.118394	0.00650792	0.0280772
SLCO1B3	0.137602	0.00154318	0.0097901	0.159327	0.000240298	0.0033649	0.193258	7.88863e-06	0.000229711
TMEM184A	0.21644	5.26255e-07	2.09884e-05	0.103572	0.0173878	0.0640916	0.146515	0.000741626	0.00566248
SLX1B-SULT1A4	0.209779	1.18265e-06	3.77554e-05	0.123336	0.00457575	0.024957	0.14078	0.00119407	0.00810351
SLC35A4	-0.125656	0.00386193	0.0195859	-0.151905	0.000466579	0.00522471	-0.208607	1.36019e-06	7.46306e-05
ZNF382	-0.160757	0.000210738	0.00211482	-0.150975	0.000505955	0.00547619	-0.178797	3.65753e-05	0.000663745
KCNK5	0.244689	1.26602e-08	1.37669e-06	0.0791802	0.0693345	0.170507	0.115238	0.00809716	0.0328776
NOL9	-0.119722	0.00592726	0.0273455	-0.190077	1.1167e-05	0.000406629	-0.178161	3.90212e-05	0.000695139
KATNAL1	-0.21313	7.89477e-07	2.79611e-05	-0.102469	0.0186263	0.0673576	-0.151443	0.000485777	0.00413297
ARPC1B	0.159899	0.000228036	0.00224631	0.169358	9.34945e-05	0.00173052	0.162609	0.000177499	0.00203094
RWDD2A	-0.145645	0.000798065	0.00586808	-0.166898	0.000118447	0.00205107	-0.178909	3.61578e-05	0.000657883
WWC2	-0.177288	4.26363e-05	0.000601881	-0.157196	0.000291611	0.00380763	-0.154329	0.000376886	0.00347869
SLC25A38	-0.129292	0.00294407	0.0158954	-0.173256	6.38347e-05	0.00133549	-0.186445	1.64896e-05	0.00037626
ARHGEF3	0.172866	6.63434e-05	0.000855111	0.167412	0.000112767	0.00197932	0.149311	0.000584273	0.00472545
KYNU	0.172808	6.67227e-05	0.000857537	0.144301	0.000893144	0.00804119	0.170955	8.0044e-05	0.00116177
SDC2	-0.202355	2.8289e-06	7.3599e-05	-0.107153	0.0138508	0.0547851	-0.162824	0.000173988	0.00200953
APOL6	0.179167	3.52191e-05	0.000518746	0.170083	8.71414e-05	0.00163466	0.137919	0.00150464	0.00957044
LEPRE1	-0.227193	1.3475e-07	7.53246e-06	-0.103871	0.0170651	0.0635079	-0.127471	0.00337548	0.0172416
EPCAM	0.225039	1.78013e-07	8.91281e-06	0.0859842	0.0485112	0.131393	0.143054	0.000990617	0.00706011
SPATA6	-0.195609	6.07929e-06	0.000133677	-0.134998	0.00189667	0.0136151	-0.149794	0.000560467	0.00459161
MLPH	0.172152	7.11814e-05	0.000907302	0.169165	9.52585e-05	0.00175384	0.147364	0.000690136	0.00535451
PHF14	-0.153468	0.000406723	0.00348489	-0.175506	5.10189e-05	0.00114968	-0.16193	0.000189073	0.00212752
ERC1	-0.219785	3.46982e-07	1.53205e-05	-0.129194	0.00296574	0.0184106	-0.116794	0.00727447	0.0303973
OSTF1	0.175161	5.28091e-05	0.000714334	0.140679	0.00120392	0.00993913	0.170303	8.52971e-05	0.00120778
LINC00842	0.168336	0.000103189	0.00120192	0.165121	0.000140226	0.00232357	0.156198	0.000319001	0.00308619
DDR2	-0.225307	1.71979e-07	8.67309e-06	-0.0852406	0.0504961	0.135387	-0.142378	0.00104752	0.00736016
HES6	-0.109599	0.0118152	0.0450635	-0.171755	7.40116e-05	0.00146957	-0.200661	3.43641e-06	0.000131164
CCDC23	-0.15567	0.000334444	0.00301108	-0.165751	0.0001321	0.00222604	-0.169091	9.59396e-05	0.00130754
APBB1	-0.201666	3.06251e-06	7.80743e-05	-0.131953	0.00240318	0.0159513	-0.142934	0.00100048	0.00710492
GOLGA5	0.183098	2.34626e-05	0.000375468	0.123804	0.0044228	0.0243516	0.173463	6.25339e-05	0.000974703
FAM129B	0.136291	0.00171285	0.0105819	0.154649	0.000366319	0.00445309	0.195957	5.84819e-06	0.000189746
MIR5090	-0.146709	0.000729573	0.00546258	-0.188027	1.39274e-05	0.000471245	-0.154149	0.000382932	0.00352982
NRAS	-0.152537	0.000441432	0.00369693	-0.145608	0.000800592	0.00743392	-0.188174	1.37092e-05	0.000332987
GPR56	0.164989	0.000141995	0.00155266	0.166928	0.000118101	0.00205107	0.157149	0.000292834	0.00289802
BAG3	0.143335	0.000967824	0.00679923	0.165017	0.000141615	0.00234101	0.180775	2.98593e-05	0.000580462
BRF2	-0.176288	4.71656e-05	0.000651744	-0.146345	0.000752345	0.00712942	-0.162809	0.000174231	0.00200953
CRYBB2P1	-0.168869	9.80198e-05	0.00115511	-0.15801	0.000270893	0.00361719	-0.161075	0.00020464	0.00224575
THOC5	-0.170148	8.65951e-05	0.00105544	-0.145765	0.000790082	0.00737569	-0.170304	8.52862e-05	0.00120778
C1orf172	0.225934	1.58615e-07	8.26875e-06	0.0999661	0.0217232	0.0749171	0.129551	0.00288687	0.015428
THAP3	-0.167103	0.000116144	0.00132836	-0.156946	0.000298243	0.00386163	-0.163902	0.000157294	0.00187607
NCKAP5L	-0.21377	7.30328e-07	2.63656e-05	-0.106768	0.0141978	0.055746	-0.144095	0.000908599	0.00659718
SRSF10	-0.1006	0.0208994	0.0693323	-0.171434	7.63762e-05	0.00149309	-0.205453	1.97356e-06	9.37543e-05
LLGL1	-0.183023	2.3647e-05	0.000377458	-0.151184	0.000496846	0.00544536	-0.149201	0.000589848	0.00475947
MED9	-0.147465	0.000684205	0.00521547	-0.141434	0.00113193	0.00952539	-0.195335	6.26791e-06	0.000197382
SLPI	0.209369	1.24204e-06	3.9113e-05	0.102638	0.0184314	0.0668502	0.153096	0.000420279	0.00375473
MMP28	0.190949	1.01575e-05	0.000201569	0.155997	0.000324821	0.00410024	0.13412	0.00203168	0.011903
BLMH	-0.204602	2.17998e-06	5.92027e-05	-0.133757	0.00208997	0.0144872	-0.134722	0.00193813	0.0114746
PIK3C2A	-0.121875	0.00508448	0.0242118	-0.194207	7.10433e-06	0.000313677	-0.169171	9.52045e-05	0.00129917
RLIMP2	-0.128936	0.00302406	0.0162017	-0.152922	0.000426741	0.00491299	-0.201359	3.17249e-06	0.000124388
SARM1	-0.206341	1.7783e-06	5.12466e-05	-0.123186	0.0046257	0.0251504	-0.14158	0.00111846	0.00770688
SLC2A1	0.174526	5.6269e-05	0.000753085	0.149948	0.000553048	0.00581629	0.16084	0.000209141	0.00227603
HNRNPM	-0.149112	0.000594363	0.00467134	-0.176108	4.80238e-05	0.00112189	-0.163367	0.000165374	0.00193595
RAD54L	-0.114519	0.00850392	0.0354389	-0.155174	0.000349582	0.004306	-0.210141	1.13248e-06	6.65107e-05
KIAA1211L	0.19444	6.92301e-06	0.00014963	0.129334	0.00293453	0.018308	0.152973	0.000424871	0.00377877
GOLGA8I	-0.185082	1.90511e-05	0.000320643	-0.147196	0.000700028	0.00676645	-0.149071	0.000596431	0.00479545
SMARCA4	-0.162941	0.000172095	0.00180921	-0.162294	0.000182791	0.00278977	-0.162357	0.000181712	0.00206976
LRRC41	-0.176271	4.72454e-05	0.000651744	-0.118891	0.00628498	0.0310546	-0.182165	2.58575e-05	0.000516371
CENPV	-0.103923	0.0170097	0.0593378	-0.199162	4.07656e-06	0.000235344	-0.177133	4.331e-05	0.000748406
SNCG	0.158598	0.000256807	0.00244997	0.151191	0.000496544	0.00544536	0.176421	4.65385e-05	0.000786127
IFIH1	0.188101	1.38181e-05	0.000252407	0.16052	0.000215393	0.00311973	0.131961	0.00240184	0.0134208
NCEH1	0.119334	0.00609181	0.0278764	0.17386	6.01194e-05	0.00128937	0.189628	1.17232e-05	0.000296144
FLCN	-0.190474	1.06959e-05	0.000206773	-0.120418	0.00564202	0.0288403	-0.164407	0.000149993	0.0018186
CDC14A	-0.0773659	0.075982	0.177986	-0.174306	5.75165e-05	0.00125089	-0.214052	7.05636e-07	4.88644e-05
HIPK1	-0.147864	0.00066139	0.00506932	-0.129811	0.0028306	0.0178358	-0.201848	2.99918e-06	0.000120508
IL1A	0.141761	0.00110201	0.00750431	0.139391	0.00133665	0.0107048	0.200078	3.67304e-06	0.000137803
RAB33B	-0.159544	0.000235575	0.0022962	-0.162676	0.000176396	0.0027433	-0.164798	0.000144573	0.00176434
ZNF443	-0.116554	0.0073962	0.0321009	-0.196999	5.2038e-06	0.000263188	-0.168983	9.69472e-05	0.00131778
PLEKHG6	0.228159	1.18818e-07	6.83021e-06	0.0966595	0.0264941	0.0861816	0.125567	0.00388716	0.0190915
TMEM238	0.222002	2.62335e-07	1.22312e-05	0.103867	0.017069	0.0635079	0.130478	0.0026906	0.0146749
ZNF618	-0.184545	2.01588e-05	0.000332059	-0.13573	0.00179057	0.0131035	-0.158488	0.000259404	0.00264176
CD22	0.0710486	0.103268	0.220323	0.204782	2.13477e-06	0.00015557	0.18804	1.39086e-05	0.000335517
HBS1L	-0.139743	0.00129908	0.00853074	-0.163687	0.0001605	0.00255606	-0.181724	2.70685e-05	0.000535179
GLMN	-0.0835264	0.0553309	0.141027	-0.198076	4.60977e-06	0.000251427	-0.188322	1.3494e-05	0.000329513
NEK4	-0.0663965	0.127936	0.256369	-0.198457	4.41573e-06	0.000244871	-0.196177	5.70614e-06	0.000187763
SMO	-0.204929	2.09839e-06	5.72697e-05	-0.134871	0.00191567	0.013695	-0.129999	0.0027903	0.0150887
HBQ1	-0.10636	0.0145742	0.0528828	-0.212188	8.8506e-07	8.58958e-05	-0.158615	0.000256414	0.00262006
EID2	-0.12784	0.00328368	0.0172539	-0.176039	4.8361e-05	0.00112189	-0.18	3.23372e-05	0.000614892
NAPRT1	0.177758	4.06529e-05	0.000580952	0.142697	0.0010203	0.00883178	0.160547	0.000214865	0.00232018
CSNK1G2	-0.169303	9.39931e-05	0.00111344	-0.170418	8.43442e-05	0.00161041	-0.143736	0.000936179	0.00675786
PALM3	-0.104666	0.0162315	0.057352	-0.199168	4.07382e-06	0.000235344	-0.174551	5.61274e-05	0.000903164
MIIP	-0.0759444	0.0815449	0.186774	-0.183752	2.191e-05	0.000647486	-0.204312	2.25491e-06	0.000100838
ARHGAP40	0.172868	6.63277e-05	0.000855111	0.117825	0.00677192	0.0326379	0.183932	2.15007e-05	0.000452751
KIF1A	-0.144234	0.000898183	0.00641118	-0.180443	3.08976e-05	0.000827045	-0.160003	0.000225875	0.00240363
POLR3D	-0.207725	1.51033e-06	4.52429e-05	-0.129604	0.00287526	0.0180518	-0.129072	0.00299326	0.0158411
DSEL	-0.196904	5.25969e-06	0.000118654	-0.132838	0.00224455	0.0151881	-0.142744	0.00101635	0.00718462
PANK4	-0.0740334	0.0895377	0.199468	-0.183516	2.2458e-05	0.000658091	-0.204546	2.19413e-06	9.88353e-05
ZNF621	-0.171495	7.59219e-05	0.000956341	-0.119032	0.00622283	0.030868	-0.184193	2.09191e-05	0.000446585
SRP9	-0.100915	0.0205006	0.068478	-0.188087	1.38378e-05	0.000469775	-0.185391	1.84393e-05	0.0004101
CAST	0.170239	8.58277e-05	0.00105069	0.143959	0.000918947	0.00820977	0.166847	0.000119019	0.00153406
HMGA1	0.15837	0.0002622	0.00249117	0.150786	0.000514357	0.00554128	0.173568	6.18919e-05	0.000965777
AXIN2	-0.147911	0.000658749	0.00505186	-0.175566	5.07112e-05	0.00114968	-0.160708	0.000211692	0.0022967
ANO9	0.231984	7.18295e-08	4.52396e-06	0.0832133	0.0562542	0.146465	0.124662	0.00415431	0.0201477
FAM115A	-0.155917	0.000327148	0.00296071	-0.167747	0.000109201	0.0019354	-0.160449	0.00021681	0.0023344
EMP1	0.090201	0.0384521	0.108146	0.176763	4.49604e-05	0.00107158	0.202393	2.81664e-06	0.000115648
MARVELD2	0.209913	1.16391e-06	3.7501e-05	0.109133	0.0121809	0.0499398	0.14261	0.00102769	0.00725006
ARRDC1	0.217466	4.6347e-07	1.90788e-05	0.0999904	0.0216912	0.0748766	0.137653	0.0015369	0.00969723
FIG4	-0.0935193	0.0318345	0.0947818	-0.18578	1.76954e-05	0.000562333	-0.191362	9.71056e-06	0.000262449
ITFG1	0.140558	0.0012159	0.0080938	0.162818	0.00017409	0.0027135	0.179188	3.51432e-05	0.000646421
SFPQ	-0.102344	0.018771	0.063975	-0.184938	1.93429e-05	0.00059697	-0.186398	1.65724e-05	0.00037753
PRMT10	-0.159185	0.000243428	0.00234645	-0.150665	0.000519754	0.00558645	-0.171731	7.41861e-05	0.00110794
CCR10	-0.186619	1.61876e-05	0.000285197	-0.138754	0.00140703	0.0110872	-0.149749	0.000562643	0.00459591
FAM216A	-0.178657	3.71007e-05	0.000541305	-0.161015	0.000205787	0.00302464	-0.139321	0.00134413	0.00888785
MICAL1	-0.176273	4.72335e-05	0.000651744	-0.149075	0.000596235	0.00607985	-0.153416	0.000408579	0.00368547
SSBP4	-0.167212	0.000114947	0.00131791	-0.154811	0.000361087	0.00440488	-0.159169	0.000243792	0.00254755
RAVER2	-0.134357	0.00199443	0.0118125	-0.149556	0.000572081	0.00593449	-0.194481	6.8917e-06	0.00021129
BSPRY	0.226842	1.41023e-07	7.63774e-06	0.0950175	0.0291816	0.0920413	0.123713	0.00445222	0.021172
MYLIP	0.171129	7.86885e-05	0.000981445	0.195952	5.85122e-06	0.00028181	0.104623	0.0162758	0.0546726
GRB7	0.214045	7.06215e-07	2.57939e-05	0.104111	0.0168096	0.0628254	0.138372	0.00145089	0.00934553
CAPN2	0.109676	0.0117553	0.0449263	0.157258	0.00028998	0.00379702	0.206378	1.77056e-06	8.89692e-05
RGPD6	-0.139795	0.00129364	0.00851755	-0.167252	0.000114505	0.0020062	-0.174718	5.51975e-05	0.000891217
UBE3D	-0.0703119	0.106902	0.225929	-0.19237	8.69759e-06	0.000348881	-0.195642	6.05696e-06	0.000193809
NEK1	-0.231143	8.02876e-08	5.00693e-06	-0.0849667	0.0512441	0.136693	-0.122594	0.00482809	0.0224238
CTIF	-0.211926	9.13542e-07	3.13192e-05	-0.130267	0.0027341	0.0174647	-0.118372	0.0065179	0.0280788
SMARCAD1	-0.190868	1.02474e-05	0.000201744	-0.129248	0.00295369	0.0183701	-0.151311	0.000491405	0.0041732
RGPD8	-0.134344	0.00199641	0.0118125	-0.168973	9.70418e-05	0.00177727	-0.17734	4.24109e-05	0.000740673
CACNA2D1	-0.189864	1.14276e-05	0.000218491	-0.128084	0.00322414	0.0193917	-0.153467	0.000406744	0.00367628
HCFC2	-0.199904	3.74672e-06	9.14923e-05	-0.120376	0.00565876	0.0289149	-0.145801	0.000787671	0.00592306
KANSL3	-0.162586	0.00017789	0.00185472	-0.149321	0.000583788	0.00601907	-0.16808	0.000105761	0.00140467
RHOQP2	-0.204451	2.21884e-06	6.00856e-05	-0.0908124	0.0371519	0.109147	-0.159947	0.000227038	0.00241233
ADO	-0.150954	0.000506904	0.00414061	-0.16043	0.000217177	0.00313042	-0.170054	8.73844e-05	0.00122242
R3HCC1	-0.188249	1.35999e-05	0.000250337	-0.159516	0.000236189	0.00332745	-0.125572	0.00388573	0.0190912
UBE2J2	-0.123874	0.00440033	0.0216578	-0.184713	1.9807e-05	0.000601035	-0.170063	8.73113e-05	0.00122242
TXNDC11	0.152997	0.000423958	0.00358727	0.142304	0.00105392	0.0090497	0.182834	2.41174e-05	0.000491494
MAK16	-0.13324	0.00217572	0.0126078	-0.19315	7.98364e-06	0.00033137	-0.152768	0.000432587	0.00382354
SECTM1	0.1444	0.000885802	0.00635996	0.160641	0.000212997	0.00309943	0.17588	4.91361e-05	0.000813228
PI4KA	-0.167488	0.00011195	0.00128886	-0.144208	0.00090015	0.00808334	-0.16658	0.000122096	0.00155654
WDR35	-0.186145	1.70232e-05	0.000295076	-0.156473	0.000311216	0.003991	-0.131416	0.00250445	0.0138882
ZNF70	-0.190911	1.01995e-05	0.000201569	-0.144013	0.000914866	0.00818382	-0.137234	0.00158921	0.00991743
TRAF3IP1	-0.108618	0.0125978	0.047443	-0.195211	6.35538e-06	0.000296024	-0.170868	8.07271e-05	0.0011656
SF3A3	-0.113119	0.00934942	0.0378916	-0.185925	1.7425e-05	0.000557289	-0.176596	4.57241e-05	0.000779944
CAPN7	-0.134762	0.00193208	0.011532	-0.126131	0.00372878	0.0216344	-0.210161	1.12977e-06	6.65107e-05
IL17RE	0.210036	1.14693e-06	3.72123e-05	0.0947953	0.0295627	0.0929907	0.148885	0.000606044	0.00483689
TNRC6B	-0.152179	0.000455529	0.00379671	-0.134102	0.00203452	0.0142519	-0.189045	1.24837e-05	0.000310286
DHRS7	0.136128	0.00173502	0.0106576	0.143812	0.000930258	0.00827364	0.195857	5.91354e-06	0.000190534
EZR-AS1	0.21683	5.01474e-07	2.03499e-05	0.102035	0.0191336	0.0686218	0.133854	0.00207426	0.0120701
ARID5B	-0.138304	0.00145881	0.00935293	-0.134054	0.00204221	0.0142913	-0.201131	3.25642e-06	0.00012654
PYGO1	-0.202421	2.80749e-06	7.31788e-05	-0.100223	0.021386	0.0741399	-0.155971	0.000325577	0.00312963
AGR2	0.211362	9.77896e-07	3.31176e-05	0.0942866	0.0304511	0.0948633	0.147086	0.000706606	0.00544286
HCG18	-0.104991	0.0159018	0.0565067	-0.165606	0.000133932	0.00225145	-0.200029	3.69367e-06	0.000138177
EIF2B3	-0.165315	0.000137683	0.00151975	-0.147985	0.000654555	0.00650303	-0.164391	0.000150221	0.00181978
ADAP1	0.209954	1.15819e-06	3.74696e-05	0.106744	0.0142199	0.0558168	0.139753	0.00129803	0.00863223
E2F2	-0.0748076	0.086227	0.194363	-0.172671	6.76301e-05	0.00138503	-0.210033	1.14725e-06	6.7095e-05
GXYLT1	-0.126391	0.00365764	0.0187368	-0.178525	3.7603e-05	0.000937986	-0.172665	6.76686e-05	0.00103583
PRRT2	-0.170421	8.43223e-05	0.00103623	-0.134376	0.00199139	0.0140416	-0.169593	9.13907e-05	0.00125823
KHSRP	-0.15334	0.000411317	0.00351019	-0.162819	0.000174064	0.0027135	-0.163496	0.00016339	0.00192567
HLA-F	0.147327	0.000692313	0.00525999	0.161888	0.000189818	0.00286861	0.1702	8.61539e-05	0.0012162
ODF3B	0.176836	4.46291e-05	0.000623688	0.154017	0.00038744	0.00459351	0.144436	0.000883132	0.00645944
C11orf49	-0.0993391	0.0225659	0.0733009	-0.183245	2.31048e-05	0.000674891	-0.186329	1.66933e-05	0.000379664
KRT6A	0.19278	8.31476e-06	0.000173253	0.12127	0.00530988	0.0275983	0.152292	0.00045101	0.00393087
TTC21B	-0.156971	0.000297595	0.00275231	-0.149362	0.000581729	0.00600228	-0.171369	7.68643e-05	0.00113938
SALL1	-0.201161	3.24536e-06	8.19823e-05	-0.133142	0.00219232	0.0149583	-0.129658	0.00286354	0.0153535
MBD3	-0.189307	1.21357e-05	0.000229818	-0.141363	0.00113856	0.00955673	-0.139819	0.00129115	0.00860295
PSMB9	0.122827	0.00474774	0.0230011	0.185529	1.81714e-05	0.000573533	0.167646	0.000110266	0.00145203
TUBB2B	-0.223921	2.05453e-07	9.89518e-06	-0.0754651	0.083493	0.193587	-0.13687	0.00163586	0.0101277
ZFP28	-0.143278	0.000972476	0.00681909	-0.156413	0.00031292	0.0039959	-0.177662	4.105e-05	0.000722345
EREG	0.165856	0.000130791	0.00146341	0.133852	0.00207454	0.0144149	0.173993	5.93326e-05	0.000937401
POM121B	-0.124072	0.00433739	0.0214057	-0.185644	1.79519e-05	0.000567893	-0.165899	0.000130271	0.00162915
ZFP30	-0.146527	0.000740908	0.00553256	-0.138962	0.00138364	0.0109863	-0.188409	1.33682e-05	0.000327016
OASL	0.179802	3.30013e-05	0.000493389	0.142957	0.000998622	0.00871405	0.149258	0.000586953	0.00474437
C7orf55-LUC7L2	-0.0878544	0.0438064	0.118997	-0.191876	9.18123e-06	0.000354982	-0.183079	2.35085e-05	0.00048403
DHRS3	0.169549	9.17752e-05	0.00109838	0.138819	0.00139967	0.0110568	0.165394	0.000136655	0.00169075
TNPO3	-0.109965	0.011534	0.0442652	-0.177582	4.1385e-05	0.00100882	-0.183695	2.20421e-05	0.000461071
C1orf50	-0.171125	7.87207e-05	0.000981445	-0.110511	0.0111265	0.0466847	-0.184043	2.12522e-05	0.000450242
STARD4-AS1	-0.203502	2.47765e-06	6.59396e-05	-0.11871	0.00636514	0.0312848	-0.136984	0.00162118	0.0100564
DR1	-0.107472	0.0135687	0.0500387	-0.151939	0.000465193	0.00521338	-0.20776	1.50396e-06	7.95954e-05
CBX1	-0.183026	2.36393e-05	0.000377458	-0.148845	0.000608133	0.00616954	-0.139162	0.00136149	0.00895258
TTYH3	-0.207685	1.51745e-06	4.53247e-05	-0.122538	0.00484752	0.025941	-0.126785	0.00355243	0.0178635
RRP1B	-0.110449	0.0111724	0.0432329	-0.209246	1.26042e-06	0.00010905	-0.150263	0.000538214	0.00447515
CLPP	-0.153735	0.000397243	0.00343004	-0.14104	0.00116906	0.00974963	-0.179581	3.37579e-05	0.000632404
GTF2I	-0.104961	0.0159319	0.056585	-0.193654	7.55189e-06	0.000322438	-0.170982	7.9832e-05	0.0011599
HRASLS2	0.166557	0.000122359	0.00138268	0.150849	0.000511555	0.00552392	0.157794	0.00027625	0.00277225
HLA-DRB1	0.116715	0.00731468	0.0319163	0.174392	5.70242e-05	0.001246	0.181686	2.71749e-05	0.000536521
PFKFB2	0.222755	2.38423e-07	1.12495e-05	0.119062	0.00620987	0.0308504	0.101988	0.0191893	0.0614912
ZG16B	0.1898	1.15065e-05	0.000219395	0.121738	0.00513493	0.0269257	0.153738	0.000397131	0.00363423
SULT1A4	0.209153	1.27454e-06	3.97766e-05	0.108106	0.0130238	0.0523926	0.136409	0.00169687	0.0104063
ZNF608	-0.145025	0.000840757	0.00612055	-0.121846	0.00509515	0.0268029	-0.200437	3.52559e-06	0.000133713
PANK1	-0.0527944	0.226302	0.382408	-0.195205	6.35902e-06	0.000296024	-0.195652	6.05041e-06	0.000193809
ZNF711	-0.129213	0.0029616	0.0159715	-0.176057	4.82738e-05	0.00112189	-0.169837	8.92521e-05	0.00123735
CCDC88A	-0.198427	4.43054e-06	0.000103819	-0.126764	0.00355795	0.0209223	-0.136437	0.00169313	0.0104001
SMARCA5	-0.14477	0.000858894	0.00621359	-0.169811	8.9479e-05	0.00167626	-0.161592	0.000195089	0.00217062
SMIM22	0.201783	3.02166e-06	7.74559e-05	0.114877	0.00829925	0.0378002	0.141514	0.00112457	0.00773745
CEACAM1	0.182995	2.3716e-05	0.000378125	0.144548	0.000874922	0.0079181	0.141848	0.00109414	0.00760706
RHOQP3	-0.204949	2.09355e-06	5.72498e-05	-0.0915083	0.0357176	0.10632	-0.153071	0.000421199	0.00375973
EVC	-0.200782	3.38925e-06	8.43595e-05	-0.13014	0.0027607	0.0175622	-0.129459	0.00290708	0.0154678
SGTA	-0.179988	3.23754e-05	0.000486645	-0.137364	0.00157285	0.0120157	-0.152293	0.000451	0.00393087
MFHAS1	-0.103252	0.0177392	0.0612533	-0.190021	1.12351e-05	0.000407242	-0.174137	5.84865e-05	0.000927191
PTPN23	-0.102135	0.0190154	0.0645707	-0.147586	0.000677218	0.00663349	-0.212833	8.18521e-07	5.42523e-05
SDCBP2	0.191194	9.89064e-06	0.000197799	0.12187	0.00508639	0.0267815	0.150417	0.000531085	0.0044294
SLC16A1	-0.127965	0.00325298	0.0171185	-0.156241	0.00031779	0.00404696	-0.187892	1.41301e-05	0.000339126
CABIN1	-0.114685	0.00840835	0.0352184	-0.158896	0.000249926	0.00345454	-0.195611	6.07803e-06	0.000194037
CACTIN	-0.158741	0.000253485	0.00242492	-0.160398	0.00021782	0.00313042	-0.155957	0.000325967	0.00313122
TMPRSS4	0.214496	6.68321e-07	2.47579e-05	0.0890418	0.0410234	0.116651	0.140492	0.00122243	0.00823976
CCDC74A	-0.159505	0.000236417	0.00230279	-0.155628	0.000335715	0.00420595	-0.159487	0.000236801	0.00249547
TCIRG1	0.176068	4.82194e-05	0.000660597	0.138459	0.00144087	0.0112483	0.155274	0.000346492	0.0032675
FAM168A	-0.154531	0.000370179	0.0032508	-0.160856	0.000208835	0.00305013	-0.159669	0.000232883	0.00246502
CEP57L1	-0.127996	0.00324546	0.0170983	-0.174376	5.71125e-05	0.001246	-0.171219	7.80014e-05	0.00114768
ODC1	-0.144904	0.000849268	0.00615806	-0.18523	1.87545e-05	0.0005853	-0.143543	0.000951285	0.00683227
TMC7	0.154718	0.0003641	0.00320551	0.120504	0.00560769	0.0287383	0.191148	9.94039e-06	0.000267505
KBTBD11	-0.0887267	0.041747	0.11511	-0.180931	2.93818e-05	0.000797203	-0.191038	1.00597e-05	0.000268741
SOS1	-0.118422	0.00649522	0.0291743	-0.160604	0.000213729	0.00310532	-0.190732	1.04e-05	0.000273644
CHST12	-0.197225	5.07327e-06	0.000114821	-0.124448	0.00421994	0.0235704	-0.138689	0.00141448	0.00917435
NKX2-5	-0.161291	0.000200606	0.00202955	-0.160755	0.000210786	0.0030754	-0.151762	0.00047244	0.0040467
PMEL	0.174075	5.88514e-05	0.000780145	0.158827	0.000251506	0.0034571	0.138295	0.00145997	0.00936898
PRPF38A	-0.131896	0.00241386	0.0136375	-0.145864	0.000783522	0.00733412	-0.191815	9.24225e-06	0.000253733
ZNF684	-0.120902	0.00545107	0.0255724	-0.158844	0.00025113	0.0034571	-0.189969	1.1298e-05	0.00028749
MAPK13	0.207485	1.55376e-06	4.61126e-05	0.0952158	0.0288452	0.0913908	0.145427	0.000812831	0.00607942
NEXN	-0.189251	1.22097e-05	0.000230905	-0.131217	0.00254291	0.0166898	-0.143946	0.000919995	0.00665562
DUSP16	-0.107736	0.0133399	0.0494614	-0.16853	0.000101278	0.0018284	-0.190142	1.10886e-05	0.000283718
GTF2IP1	-0.111315	0.0105491	0.0413879	-0.187026	1.55e-05	0.000508832	-0.169966	8.81334e-05	0.00122673
RNF2	-0.162023	0.000187452	0.00192984	-0.127246	0.00343265	0.0203488	-0.17885	3.63792e-05	0.000661047
PLAT	0.0740298	0.0895535	0.199471	0.201183	3.23718e-06	0.00020481	0.179399	3.43923e-05	0.000638275
ST13P4	-0.179888	3.27102e-05	0.000490088	-0.116316	0.00751891	0.0351645	-0.166836	0.00011915	0.00153406
FAM85A	-0.180001	3.23349e-05	0.000486562	-0.150838	0.000512047	0.00552494	-0.137351	0.00157447	0.00986185
FAM92A1	-0.20233	2.8371e-06	7.36746e-05	-0.123964	0.00437181	0.0241391	-0.130193	0.00274964	0.014921
C4orf3	-0.158796	0.000252229	0.00241622	-0.161011	0.000205865	0.00302464	-0.153601	0.000401977	0.00365217
LEPREL2	-0.209251	1.25976e-06	3.94923e-05	-0.112621	0.00966831	0.0423053	-0.128676	0.00308392	0.0161798
ZKSCAN5	-0.192941	8.16866e-06	0.000170977	-0.134266	0.00200863	0.0141274	-0.135191	0.00186807	0.0112028
SLC39A11	0.2203	3.25256e-07	1.48434e-05	0.0915816	0.0355692	0.106105	0.127245	0.00343291	0.0174001
LRP1	-0.207843	1.48936e-06	4.47742e-05	-0.124754	0.00412643	0.0231877	-0.119489	0.00602551	0.0264338
RNF123	-0.118909	0.00627705	0.0285137	-0.172951	6.57852e-05	0.00136057	-0.177857	4.02453e-05	0.00071269
NHEJ1	-0.134747	0.00193444	0.0115411	-0.15886	0.00025075	0.0034571	-0.178141	3.91044e-05	0.000695139
MRPS25	-0.0936555	0.0315852	0.0942511	-0.160467	0.000216445	0.00313042	-0.205291	2.01135e-06	9.45234e-05
NKTR	-0.109796	0.0116636	0.044674	-0.178219	3.87931e-05	0.000960784	-0.179022	3.57443e-05	0.000653777
ITPKA	-0.164951	0.000142504	0.00155652	-0.173034	6.52504e-05	0.0013544	-0.13208	0.00237981	0.0133405
ZNF653	-0.156725	0.000304241	0.0027989	-0.154562	0.000369181	0.00448256	-0.16107	0.000204746	0.00224575
CSRP2	-0.198264	4.51316e-06	0.000105224	-0.111006	0.0107682	0.0457097	-0.145849	0.000784498	0.00591198
CTNND1	0.181725	2.7064e-05	0.000420428	0.114575	0.00847152	0.0383713	0.164766	0.000145011	0.00176434
VN1R83P	-0.118895	0.00628297	0.0285137	-0.161191	0.000202463	0.00299665	-0.188102	1.38165e-05	0.000333874
CUEDC2	-0.159762	0.00023092	0.00226829	-0.161876	0.000190018	0.00286861	-0.150433	0.000530321	0.0044294
LIMS3	-0.156536	0.000309451	0.00283932	-0.169104	9.58215e-05	0.00175955	-0.146142	0.000765396	0.00580892
HTATIP2	0.195532	6.13219e-06	0.000134628	0.140044	0.00126772	0.0103167	0.123825	0.00441622	0.0210584
ATP5A1	-0.113696	0.00899267	0.0368864	-0.163096	0.000169621	0.00266474	-0.189533	1.18439e-05	0.00029811
ZBTB17	-0.174041	5.90524e-05	0.000781322	-0.150228	0.000539807	0.00571374	-0.144131	0.0009059	0.00658445
SMC1A	-0.1353	0.00185225	0.0112044	-0.159633	0.000233661	0.00330186	-0.176038	4.83651e-05	0.000804295
CDK19	-0.160497	0.00021585	0.00215525	-0.150094	0.000546124	0.00575872	-0.160039	0.000225119	0.00239892
NIPSNAP1	-0.11193	0.0101259	0.0401452	-0.198036	4.63088e-06	0.000251427	-0.156733	0.000304038	0.00297051
CARD6	0.135233	0.00186199	0.0112355	0.157444	0.000285142	0.00374424	0.177769	4.06073e-05	0.000716366
ST3GAL2	-0.208224	1.42344e-06	4.31653e-05	-0.114691	0.00840518	0.0381702	-0.126294	0.00368407	0.0183663
RAB27B	0.171123	7.87384e-05	0.000981445	0.138865	0.00139449	0.0110435	0.157591	0.000281373	0.00280949
LINC00707	0.100552	0.0209603	0.0694409	0.188876	1.27132e-05	0.000445026	0.173165	6.44116e-05	0.000996302
RBM47	0.220005	3.37529e-07	1.51283e-05	0.0979654	0.0245117	0.0816215	0.12051	0.0056054	0.0251277
MTERFD3	-0.109702	0.011735	0.0448983	-0.183235	2.31283e-05	0.000674891	-0.172695	6.7468e-05	0.00103538
ARID2	-0.117816	0.00677589	0.0301258	-0.175102	5.31241e-05	0.0011831	-0.17493	5.40454e-05	0.000880865
SPRR1B	0.187519	1.47057e-05	0.000263774	0.117714	0.00682444	0.0328273	0.15341	0.00040882	0.00368547
ALDH1B1	-0.144742	0.00086084	0.0062212	-0.17261	6.80383e-05	0.00138533	-0.15326	0.000414252	0.00372239
COL11A1	-0.214592	6.60522e-07	2.46483e-05	-0.0887124	0.04178	0.11812	-0.135439	0.00183198	0.0110435
UQCRC1	-0.0904278	0.0379655	0.107254	-0.144932	0.000847299	0.00775016	-0.21699	4.91657e-07	3.89851e-05
SYDE2	-0.00785138	0.857298	0.91486	-0.185452	1.83208e-05	0.000575639	-0.210969	1.02536e-06	6.17964e-05
RGAG4	-0.146986	0.000712639	0.00537399	-0.144021	0.000914258	0.00818382	-0.177323	4.24866e-05	0.000741066
RGPD5	-0.133309	0.00216414	0.0125511	-0.164949	0.000142527	0.0023422	-0.171679	7.45634e-05	0.00111238
MAGED1	-0.1828	2.42042e-05	0.000385026	-0.127751	0.00330553	0.0197551	-0.150847	0.000511601	0.00430791
TC2N	0.206047	1.84082e-06	5.23975e-05	0.0977836	0.0247797	0.0822974	0.141808	0.00109776	0.00760815
ARSK	-0.220253	3.27184e-07	1.48826e-05	-0.0697803	0.109586	0.234991	-0.138252	0.00146492	0.0093958
FAM21C	-0.126135	0.00372774	0.0190199	-0.191834	9.22297e-06	0.000355608	-0.148783	0.000611368	0.00487386
BATF	0.19617	5.71057e-06	0.000126612	0.109235	0.0121003	0.0497267	0.146946	0.000715059	0.00549884
ACTR3B	-0.078809	0.0706543	0.168917	-0.206617	1.72144e-06	0.000135371	-0.166915	0.00011825	0.00152966
NPRL2	-0.0777975	0.0743553	0.175178	-0.179949	3.25062e-05	0.000860179	-0.192746	8.34551e-06	0.000236812
ARRB2	-0.0940438	0.0308833	0.0926831	-0.203374	2.51446e-06	0.000171563	-0.161051	0.000205104	0.00224791
UQCRH	-0.113858	0.00889451	0.036628	-0.135268	0.00185683	0.0134052	-0.208879	1.31688e-06	7.39099e-05
COX11	-0.175915	4.89645e-05	0.00066752	-0.143559	0.00095008	0.00836773	-0.144213	0.000899714	0.00654975
OLFML2B	-0.19867	4.31031e-06	0.000101515	-0.100309	0.0212741	0.0738807	-0.148754	0.000612883	0.00488307
CCDC25	-0.148262	0.000639273	0.00493513	-0.154546	0.000369686	0.00448256	-0.165613	0.000133846	0.00166191
EXOSC10	-0.118051	0.00666573	0.0297544	-0.164991	0.000141968	0.0023422	-0.181833	2.67626e-05	0.000529883
BCKDHB	-0.0875133	0.0446346	0.120401	-0.204615	2.17668e-06	0.00015698	-0.163102	0.000169535	0.00197305
ENDOD1	0.142741	0.00101661	0.00704337	0.202313	2.84283e-06	0.000188425	0.118245	0.00657621	0.0282587
EVI5	-0.14797	0.00065544	0.00503759	-0.149017	0.000599249	0.00609718	-0.16999	8.79346e-05	0.00122642
GAREML	-0.117007	0.00716815	0.0314743	-0.177063	4.36163e-05	0.00104852	-0.171133	7.8659e-05	0.00115365
FUS	-0.144696	0.00086421	0.00624145	-0.161675	0.000193602	0.00289757	-0.162031	0.00018731	0.00211322
TLN1	-0.200193	3.62539e-06	8.88412e-05	-0.130107	0.00276769	0.0175906	-0.121009	0.00540945	0.0245258
IL4R	0.184582	2.00815e-05	0.000331965	0.103791	0.0171505	0.0636659	0.164345	0.000150884	0.00182623
SRSF4	-0.108665	0.0125586	0.0473465	-0.158375	0.000262076	0.00354159	-0.193101	8.02669e-06	0.000232273
RBFOX2	-0.220056	3.35381e-07	1.51074e-05	-0.106028	0.0148873	0.0575762	-0.108762	0.0124797	0.0449953
SRRM1	-0.0823326	0.0589203	0.147724	-0.18369	2.20545e-05	0.000648999	-0.185338	1.85422e-05	0.000411624
TTL	-0.200599	3.46115e-06	8.5722e-05	-0.110037	0.0114801	0.0477275	-0.137745	0.00152571	0.00964778
ZNF165	0.216567	5.18056e-07	2.08774e-05	0.10166	0.0195815	0.0696181	0.118669	0.00638374	0.0276722
TMEM201	-0.107443	0.013594	0.0500966	-0.161397	0.000198648	0.00295088	-0.190819	1.03025e-05	0.000272769
TNFAIP8L1	-0.110709	0.0109816	0.0426564	-0.171692	7.44688e-05	0.00147654	-0.179257	3.48943e-05	0.000644157
PCDH18	-0.202558	2.76366e-06	7.23071e-05	-0.108765	0.0124772	0.0507216	-0.135378	0.00184082	0.0110775
ZFYVE9	-0.16771	0.000109586	0.00126373	-0.125013	0.00404902	0.0228727	-0.167985	0.000106729	0.00141617
BRSK1	-0.196759	5.34609e-06	0.000120214	-0.114566	0.00847701	0.0383837	-0.139314	0.0013449	0.00888872
GPX2	0.199692	3.83844e-06	9.32412e-05	0.104711	0.0161852	0.0612708	0.142708	0.00101935	0.00720218
XPO7	-0.152553	0.000440838	0.00369418	-0.155278	0.000346382	0.00429322	-0.158769	0.000252852	0.00259738
DCP1A	-0.117311	0.00701823	0.0309822	-0.172556	6.83995e-05	0.00138783	-0.173653	6.13717e-05	0.000959812
USP45	-0.0981462	0.0242476	0.077569	-0.176664	4.5412e-05	0.00108049	-0.182798	2.42073e-05	0.000492604
STK40	-0.154598	0.000367985	0.00323358	-0.137054	0.00161209	0.0121922	-0.172364	6.97101e-05	0.00105697
GPR124	-0.200952	3.32408e-06	8.33655e-05	-0.110394	0.0112126	0.0469518	-0.136028	0.0017488	0.0106574
HDAC1	-0.0450638	0.301804	0.466497	-0.194319	7.01641e-06	0.000312079	-0.190008	1.12509e-05	0.000287342
LRG1	0.217662	4.52345e-07	1.87946e-05	0.102515	0.0185731	0.0672179	0.115085	0.00818198	0.0331446
MET	0.135119	0.0018788	0.0113061	0.140559	0.00121578	0.0100077	0.18666	1.61177e-05	0.000370201
ZNF625	-0.174928	5.4057e-05	0.000728383	-0.115415	0.00799913	0.0366974	-0.16646	0.000123494	0.00157122
SLC35E2B	-0.132395	0.00232276	0.0132305	-0.170376	8.46884e-05	0.00161317	-0.163108	0.000169436	0.00197305
AFTPH	0.207557	1.54054e-06	4.58177e-05	0.130283	0.00273084	0.0174601	0.105204	0.0156884	0.0534295
SZRD1	-0.157324	0.000288248	0.00268729	-0.155569	0.000337485	0.00421675	-0.152772	0.000432419	0.00382354
DCP1B	-0.173028	6.52853e-05	0.000845308	-0.154008	0.00038777	0.00459351	-0.135171	0.00187113	0.0112163
SGTB	-0.215599	5.83753e-07	2.27344e-05	-0.099256	0.0226797	0.0772777	-0.120424	0.00563965	0.0252163
MPST	-0.115949	0.00771147	0.0330578	-0.192817	8.2812e-06	0.000339018	-0.152111	0.000458243	0.00397248
FKBP7	-0.232318	6.87093e-08	4.38699e-06	-0.102198	0.0189414	0.0681958	-0.0807309	0.0640371	0.149202
RABEP1	-0.154231	0.000380171	0.00331346	-0.154139	0.000383298	0.00457951	-0.156746	0.000303678	0.00297051
LPAR5	0.181287	2.83202e-05	0.000435087	0.123273	0.00459674	0.0250419	0.151418	0.000486851	0.00413957
PHLPP2	-0.129926	0.002806	0.0153585	-0.15747	0.000284484	0.00373912	-0.176357	4.68369e-05	0.000789253
KIF26B	-0.171749	7.40505e-05	0.000938715	-0.138843	0.00139703	0.0110484	-0.150627	0.000521467	0.00437247
TMPRSS13	0.196167	5.7125e-06	0.000126612	0.10542	0.0154749	0.0592068	0.145481	0.00080916	0.00605521
MACC1	0.211525	9.58941e-07	3.27145e-05	0.0880199	0.0434093	0.121182	0.134725	0.00193774	0.0114746
ZNF714	-0.10406	0.0168634	0.0590015	-0.165812	0.00013135	0.00221608	-0.187503	1.47316e-05	0.000348276
LRP6	-0.169357	9.35004e-05	0.00111162	-0.161384	0.000198885	0.00295126	-0.13132	0.00252295	0.0139685
ADH5	-0.198753	4.27015e-06	0.00010091	-0.119385	0.00607028	0.0303383	-0.130087	0.00277191	0.0150125
CLEC11A	-0.14204	0.00107703	0.00739211	-0.13559	0.0018104	0.0131712	-0.183323	2.29167e-05	0.000475377
ANK2	-0.189031	1.25031e-05	0.000235176	-0.100905	0.0205119	0.0721164	-0.158024	0.00027055	0.00273081
HMGB1P3	0.0881899	0.0430045	0.117576	0.200345	3.56295e-06	0.000215225	0.164224	0.000152601	0.00183425
SERBP1	-0.0973263	0.0254654	0.0802655	-0.178603	3.73054e-05	0.000935543	-0.179884	3.27263e-05	0.00061891
ZNF529	-0.130351	0.00271675	0.0149938	-0.158954	0.000248613	0.00345009	-0.17431	5.74919e-05	0.000914548
SP140L	0.121435	0.0052473	0.0247359	0.180592	3.04264e-05	0.000817576	0.16015	0.000222844	0.00238231
FAM172A	-0.17634	4.69171e-05	0.000649144	-0.124826	0.0041049	0.023104	-0.155506	0.000339384	0.00322229
HMGN4	-0.129151	0.00297538	0.0160334	-0.163517	0.00016307	0.00259402	-0.170885	8.05902e-05	0.00116547
ZNF74	-0.126685	0.00357882	0.0184427	-0.183144	2.33498e-05	0.000679928	-0.152516	0.000442263	0.00388628
MPND	-0.13311	0.00219784	0.0127095	-0.15628	0.000316671	0.00403639	-0.173694	6.11192e-05	0.000957338
KIAA1191	-0.107888	0.0132087	0.0491318	-0.138486	0.0014377	0.0112384	-0.2064	1.76587e-06	8.89692e-05
CHST15	0.161753	0.000192211	0.00196142	0.121628	0.0051754	0.0270509	0.174115	5.86197e-05	0.000928246
ZNF678	-0.0880994	0.0432195	0.117919	-0.199036	4.13535e-06	0.000236872	-0.164816	0.000144323	0.00176368
TMEM41A	0.188435	1.33314e-05	0.000246101	0.124193	0.00429924	0.023877	0.140182	0.00125365	0.00841701
PLEK2	0.189767	1.15476e-05	0.000219879	0.0956327	0.0281484	0.0899426	0.159424	0.000238176	0.00250579
PLEKHA8	-0.155726	0.000332793	0.00300132	-0.126616	0.00359716	0.0210639	-0.176305	4.70844e-05	0.000792464
TPGS1	-0.190109	1.11284e-05	0.00021365	-0.134272	0.00200769	0.0141274	-0.128173	0.00320261	0.0166085
POM121C	-0.123796	0.00442532	0.0217423	-0.181586	2.74589e-05	0.000762128	-0.156169	0.000319824	0.00308926
HNRNPU	-0.0943921	0.030265	0.0913198	-0.181426	2.79172e-05	0.000769465	-0.17755	4.15184e-05	0.000728836
BMPR1A	-0.138597	0.00142491	0.00919063	-0.165731	0.000132362	0.00222774	-0.159161	0.000243978	0.00254758
SYT17	0.173617	6.15909e-05	0.000806037	0.131113	0.00256328	0.0167708	0.152461	0.000444399	0.00390012
SAMD12	0.209323	1.24891e-06	3.92406e-05	0.0879503	0.043576	0.121481	0.135355	0.0018442	0.0110883
EPHA1	0.231018	8.16276e-08	5.04967e-06	0.0768101	0.0781189	0.18528	0.10363	0.0173252	0.0570767
SUSD3	0.202192	2.88277e-06	7.44438e-05	0.107176	0.0138306	0.0547742	0.132194	0.00235912	0.0132459
TNRC6C-AS1	0.184783	1.96598e-05	0.000327327	0.120587	0.00557475	0.0285906	0.146082	0.000769257	0.00582868
DCAF15	-0.0997607	0.0219962	0.071988	-0.188611	1.30814e-05	0.000451813	-0.165407	0.000136486	0.00169017
FBP1	0.215562	5.86368e-07	2.27344e-05	0.113345	0.00920832	0.0407939	0.102757	0.0182959	0.0594722
DDHD1	-0.10607	0.0148467	0.0536756	-0.189291	1.21576e-05	0.000429704	-0.160033	0.000225259	0.00239892
GKAP1	-0.117219	0.00706358	0.0311428	-0.158108	0.0002685	0.00359006	-0.182671	2.45314e-05	0.000497236
DDIT4	0.132219	0.00235441	0.0133869	0.168579	0.000100799	0.00182448	0.160799	0.000209921	0.00228094
CBX2	-0.115853	0.00776243	0.0332039	-0.1756	5.05374e-05	0.00114968	-0.167542	0.000111366	0.00146192
SULT1A3	0.200502	3.49951e-06	8.61304e-05	0.10623	0.0146957	0.057041	0.134853	0.00191836	0.0113895
RND3	0.0923299	0.0340851	0.0993987	0.18426	2.0773e-05	0.000621805	0.174502	5.64023e-05	0.000906073
DPPA3P1	-0.159776	0.000230614	0.00226689	-0.141527	0.00112335	0.00947986	-0.158609	0.000256566	0.00262006
ZNF736	-0.137036	0.0016145	0.0101353	-0.163281	0.000166717	0.00263397	-0.162006	0.00018774	0.00211591
TAB3	0.135226	0.00186304	0.0112355	0.164957	0.000142418	0.0023422	0.161709	0.000192996	0.00215768
AP1M1	-0.210695	1.05969e-06	3.52023e-05	-0.0883583	0.0426066	0.119686	-0.131851	0.00242212	0.0135016
ZNF446	-0.107406	0.0136271	0.0501689	-0.154052	0.00038626	0.00459125	-0.192064	8.99346e-06	0.000248867
DHX58	0.135956	0.00175878	0.0107465	0.175539	5.08503e-05	0.00114968	0.149549	0.000572446	0.0046513
MIER1	-0.111391	0.0104964	0.0412361	-0.165201	0.000139171	0.00231713	-0.180257	3.14955e-05	0.000602178
USP5	-0.175597	5.05562e-05	0.000687199	-0.153639	0.00040061	0.00469934	-0.126759	0.0035591	0.0178906
PPP1R13L	0.201511	3.11768e-06	7.91879e-05	0.1121	0.0100115	0.0433033	0.127849	0.00328135	0.0169034
SLC39A4	0.22412	2.00284e-07	9.74737e-06	0.0866645	0.0467532	0.1279	0.10802	0.0130965	0.0466336
FBXL7	-0.204092	2.31343e-06	6.22837e-05	-0.0834302	0.0556131	0.145094	-0.144391	0.00088653	0.00647408
PEAR1	0.11986	0.00586976	0.0271884	0.135844	0.00177449	0.013018	0.197679	4.82108e-06	0.000166513
KLK10	0.197622	4.85175e-06	0.000111438	0.0877368	0.0440905	0.122421	0.150684	0.000518913	0.0043563
ZNF596	-0.128574	0.00310762	0.0165221	-0.137131	0.00160231	0.012154	-0.189483	1.19079e-05	0.000298641
KLHL23	-0.092691	0.0333879	0.0979608	-0.204157	2.296e-06	0.000161404	-0.15287	0.000428731	0.00379854
IQCC	-0.0826051	0.0580847	0.146252	-0.167685	0.000109852	0.00194039	-0.194222	7.09241e-06	0.000214142
LRRC49	-0.190437	1.07394e-05	0.000207326	-0.136413	0.0016964	0.0125931	-0.121945	0.00505897	0.0232779
PDP1	0.0834748	0.0554822	0.141258	0.196691	5.38688e-06	0.000268051	0.165931	0.000129873	0.00162564
USP13	-0.199491	3.92717e-06	9.44081e-05	-0.111062	0.0107278	0.0456051	-0.130859	0.00261344	0.0143158
FAM229B	-0.181311	2.82495e-05	0.00043496	-0.12849	0.00312735	0.0190501	-0.14214	0.00106822	0.00747917
C19orf12	-0.180706	3.00701e-05	0.000457928	-0.112804	0.00955003	0.0419328	-0.155189	0.00034912	0.0032856
KIAA1984	-0.131758	0.00243956	0.0137642	-0.163437	0.000164295	0.00260756	-0.164707	0.000145815	0.00177257
DMAP1	-0.127474	0.00337474	0.0176061	-0.147603	0.000676212	0.0066283	-0.181457	2.78258e-05	0.000547818
ZNF232	-0.0988789	0.0232022	0.0749134	-0.183928	2.15091e-05	0.00063699	-0.168744	9.92053e-05	0.00134157
ACTR3C	0.205471	1.96947e-06	5.51571e-05	0.10416	0.0167577	0.0627184	0.126125	0.00373044	0.0185112
ARSB	-0.232733	6.50163e-08	4.19885e-06	-0.0553747	0.204383	0.362088	-0.110065	0.011459	0.0421383
THOC1	-0.110269	0.0113057	0.0435962	-0.164556	0.000147912	0.00241076	-0.17993	3.25713e-05	0.000617657
ZDHHC17	-0.16422	0.000152667	0.00163964	-0.158555	0.000257827	0.00351488	-0.135019	0.00189361	0.0112878
MPP2	-0.153574	0.000402916	0.00345971	-0.163254	0.000167141	0.0026347	-0.142804	0.00101135	0.00715296
SCNN1D	-0.150832	0.000512297	0.00417242	-0.14571	0.000793714	0.00739188	-0.161647	0.000194099	0.00216479
MYO18A	0.165966	0.000129433	0.00145172	0.123025	0.00468002	0.0252976	0.164233	0.000152476	0.00183425
PTOV1	-0.122474	0.00487005	0.0234798	-0.157145	0.000292946	0.00381569	-0.177041	4.37134e-05	0.000753029
BEX1	-0.165192	0.000139287	0.00153139	-0.131904	0.00241238	0.0160047	-0.157839	0.000275144	0.00276515
DDX17	-0.124074	0.0043369	0.0214057	-0.162456	0.000180062	0.00276326	-0.171219	7.80004e-05	0.00114768
CARM1	-0.155255	0.000347082	0.00309285	-0.162456	0.000180055	0.00276326	-0.140999	0.00117295	0.00798351
ZBTB5	-0.0931801	0.032463	0.0960979	-0.173448	6.26319e-05	0.00131891	-0.181637	2.73136e-05	0.000538496
TLR2	0.132393	0.00232309	0.0132305	0.155051	0.000353458	0.00433461	0.170343	8.49649e-05	0.00120676
CDK5	-0.148483	0.000627317	0.00485903	-0.146091	0.000768674	0.00723406	-0.163021	0.000170817	0.00198299
DENND5B	-0.185296	1.86243e-05	0.000314984	-0.130723	0.00264075	0.017104	-0.132373	0.00232679	0.0131332
ASXL1	-0.125432	0.00392605	0.0198211	-0.175717	4.99495e-05	0.0011435	-0.155989	0.00032504	0.00312842
CHERP	-0.13104	0.00257763	0.0143915	-0.170151	8.65709e-05	0.00163276	-0.15643	0.000312428	0.00303467
GPR39	0.155555	0.0003379	0.00303826	0.146398	0.000748975	0.00711603	0.15498	0.000355707	0.00333406
ZNF2	-0.137234	0.00158925	0.0100125	-0.158004	0.000271049	0.00361719	-0.162943	0.000172071	0.00199422
HOXC-AS2	-0.134383	0.00199036	0.0117939	-0.170682	8.22008e-05	0.00157814	-0.152527	0.000441822	0.00388485
C17orf85	-0.104784	0.0161116	0.0570774	-0.185908	1.74566e-05	0.000557289	-0.160826	0.000209398	0.00227704
KRT8	0.216384	5.29926e-07	2.10744e-05	0.0790333	0.0698542	0.17146	0.124571	0.00418216	0.0202123
RAB39A	-0.160063	0.000224639	0.00222042	-0.13207	0.00238175	0.0158564	-0.162221	0.000184033	0.00208766
ZSCAN16-AS1	-0.149492	0.000575222	0.00454657	-0.142907	0.00100276	0.00872887	-0.163845	0.000158135	0.00188288
CROCCP3	-0.147824	0.000663637	0.00507816	-0.155165	0.000349887	0.004306	-0.154426	0.000373647	0.00345567
C15orf39	0.203541	2.46636e-06	6.5765e-05	0.0932207	0.0323872	0.0991635	0.13452	0.00196909	0.0115938
ADARB1	-0.128838	0.00304663	0.0162817	-0.149634	0.000568235	0.00592147	-0.176397	4.66488e-05	0.000787036
SYPL1	0.186436	1.65056e-05	0.000288983	0.105749	0.0151542	0.0583327	0.150099	0.000545883	0.00452001
RGL1	-0.196032	5.79892e-06	0.000128119	-0.10624	0.0146868	0.0570382	-0.136353	0.00170437	0.0104369
KLK8	0.178385	3.81444e-05	0.000551332	0.115855	0.00776133	0.035986	0.152612	0.000438547	0.0038585
FHL2	0.133646	0.00210809	0.012297	0.156043	0.000323481	0.00410024	0.166864	0.00011883	0.00153406
NOL3	0.141116	0.00116181	0.00781598	0.158323	0.000263316	0.00355489	0.157682	0.000279069	0.00279451
POU6F1	-0.181105	2.88581e-05	0.000442375	-0.103914	0.0170192	0.0633903	-0.157752	0.000277308	0.00278087
PITX2	-0.142404	0.00104527	0.00720965	-0.134667	0.00194663	0.0138363	-0.176499	4.61729e-05	0.000783048
CKAP5	-0.120647	0.0055511	0.025963	-0.164191	0.000153073	0.00247172	-0.170151	8.65689e-05	0.00121835
AKIRIN1	-0.130322	0.00272276	0.015021	-0.144017	0.000914574	0.00818382	-0.179238	3.49621e-05	0.000644553
ALOX12P2	0.166574	0.00012216	0.0013824	0.126331	0.00367393	0.0214323	0.158258	0.000264886	0.00268337
LDB1	-0.120079	0.00577957	0.0268332	-0.157714	0.000278274	0.00368184	-0.17601	4.85036e-05	0.000805635
TMPO-AS1	-0.0988045	0.0233067	0.0751461	-0.185869	1.75287e-05	0.00055831	-0.163671	0.000160732	0.00190241
SCARF2	-0.198863	4.21732e-06	0.000100002	-0.0963275	0.0270196	0.0874211	-0.138757	0.00140674	0.00914348
KDM8	-0.158566	0.000257558	0.00245281	-0.170189	8.62468e-05	0.00163107	-0.124671	0.00415162	0.0201417
ZNF433	-0.139477	0.0013273	0.00868031	-0.150144	0.000543771	0.0057426	-0.165851	0.000130859	0.00163357
DSG3	0.170093	8.70528e-05	0.00105732	0.130748	0.00263579	0.0170811	0.150103	0.000545692	0.00452001
RBM28	-0.09954	0.0222929	0.0727537	-0.195105	6.43011e-06	0.000298045	-0.153035	0.000422543	0.00376634
SNORD109A	-0.155007	0.000354848	0.00313994	-0.142642	0.00102491	0.00885518	-0.156914	0.000299112	0.00294646
FAM76A	-0.114871	0.00830262	0.034882	-0.136487	0.00168644	0.0125569	-0.196043	5.79238e-06	0.000188815
FECH	-0.14771	0.000670117	0.0051193	-0.142655	0.00102382	0.00885127	-0.164268	0.00015198	0.00183153
TPR	-0.104533	0.0163686	0.0577088	-0.173389	6.29941e-05	0.0013225	-0.17196	7.25348e-05	0.00109147
IL15RA	0.16102	0.000205691	0.00207014	0.132389	0.00232378	0.0156028	0.158854	0.0002509	0.00258684
INTS9	-0.157465	0.000284613	0.00265696	-0.1595	0.000236513	0.00332864	-0.138143	0.00147789	0.0094558
DYM	-0.151941	0.000465102	0.00385572	-0.14103	0.00116998	0.00975143	-0.161208	0.000202151	0.00222701
HCG4P11	0.143312	0.000969671	0.00680315	0.151071	0.000501779	0.00546157	0.160895	0.000208084	0.00227162
ZNF669	-0.0886901	0.0418318	0.11523	-0.175632	5.0377e-05	0.00114968	-0.17942	3.4318e-05	0.000637747
DNM3	-0.132417	0.00231879	0.013226	-0.1555	0.000339566	0.00423086	-0.167065	0.000116574	0.00151503
LSM14B	-0.136975	0.00162233	0.0101717	-0.169168	9.52278e-05	0.00175384	-0.149213	0.000589229	0.00475724
MMP11	-0.164457	0.000149297	0.00160966	-0.156877	0.000300107	0.00387725	-0.13169	0.00245232	0.0136481
POF1B	0.194505	6.87369e-06	0.000148795	0.117501	0.00692611	0.0331925	0.127376	0.00339938	0.0173128
SIMC1	-0.106757	0.0142084	0.0517986	-0.16457	0.000147717	0.00241041	-0.178279	3.85562e-05	0.000689799
SOBP	-0.153439	0.000407748	0.00348829	-0.142306	0.00105375	0.0090497	-0.157999	0.000271175	0.00273315
WNT5A-AS1	-0.154396	0.000374654	0.0032777	-0.112755	0.00958135	0.0420305	-0.179453	3.42027e-05	0.000636484
ASB1	-0.184186	2.09345e-05	0.000342809	-0.143671	0.000941255	0.00831946	-0.116574	0.00738618	0.0307533
LRRC4B	-0.19463	6.77862e-06	0.000147424	-0.103605	0.0173523	0.0640316	-0.138366	0.00145162	0.00934553
SLC19A1	-0.100695	0.0207776	0.0691415	-0.198696	4.29778e-06	0.000240244	-0.147514	0.000681377	0.00531322
LUC7L	-0.149922	0.000554309	0.00442652	-0.167817	0.000108473	0.00193074	-0.136364	0.00170297	0.0104329
PPP2R5D	-0.126949	0.00350925	0.0181648	-0.161099	0.000204195	0.00301398	-0.16582	0.000131241	0.00163687
TRIM47	0.165522	0.000135009	0.00149736	0.122148	0.00498577	0.0263867	0.160858	0.000208788	0.00227396
CLSPN	-0.127258	0.00342938	0.0178491	-0.151759	0.000472547	0.00527456	-0.17369	6.11447e-05	0.000957338
CCDC34	-0.136232	0.00172092	0.0105989	-0.161898	0.000189641	0.00286861	-0.156727	0.000304191	0.00297051
GCLC	0.19626	5.65365e-06	0.000125708	0.107545	0.0135056	0.0537869	0.131819	0.0024281	0.0135295
LRCH2	-0.185876	1.75169e-05	0.000300638	-0.10244	0.018659	0.0674234	-0.149988	0.000551138	0.0045446
MYO1B	0.116491	0.00742858	0.0321913	0.130616	0.00266244	0.0171965	0.197573	4.87862e-06	0.000167668
TUBB4A	-0.153698	0.000398536	0.00343269	-0.115884	0.00774584	0.0359381	-0.176982	4.39775e-05	0.000756641
ALKBH5	-0.153372	0.000410192	0.00350488	-0.1346	0.00195685	0.0138966	-0.163444	0.000164193	0.0019297
IQGAP2	-0.0649761	0.136315	0.268217	-0.189501	1.18841e-05	0.000423054	-0.175564	5.07209e-05	0.000834496
REP15	-0.186759	1.59472e-05	0.000282044	-0.155229	0.000347888	0.00430485	-0.0966215	0.0265539	0.0782891
TMEM92	0.132717	0.00226565	0.012999	0.121513	0.00521809	0.0272229	0.191019	1.00806e-05	0.000268741
CAD	-0.105146	0.015746	0.056082	-0.177745	4.07052e-05	0.000997492	-0.165237	0.000138697	0.001712
DZIP1L	-0.179951	3.2501e-05	0.000488005	-0.104979	0.0159138	0.0605202	-0.155308	0.00034544	0.00326199
NDUFS5	-0.139693	0.00130434	0.00854763	-0.140986	0.00117413	0.00978017	-0.171135	7.86449e-05	0.00115365
RARS2	-0.111084	0.0107127	0.0418732	-0.176783	4.48692e-05	0.00107124	-0.161712	0.000192946	0.00215768
RBM10	-0.132607	0.00228509	0.0130773	-0.145543	0.00080493	0.0074543	-0.173168	6.43904e-05	0.000996302
C17orf51	-0.196369	5.58489e-06	0.000124577	-0.110479	0.0111504	0.0467616	-0.128006	0.00324308	0.0167559
MXRA7	-0.170015	8.77214e-05	0.0010622	-0.136344	0.00170572	0.0126396	-0.142468	0.00103972	0.00731269
IRAK1BP1	-0.113013	0.00941667	0.0380466	-0.159809	0.000229917	0.00325888	-0.176264	4.72787e-05	0.000793814
MYEF2	-0.136348	0.00170507	0.0105473	-0.128816	0.00305159	0.0187723	-0.182667	2.4542e-05	0.000497236
CAPN8	0.209881	1.16832e-06	3.75562e-05	0.0935709	0.0317399	0.0976946	0.119156	0.00616883	0.0269204
ABCC3	0.195406	6.21893e-06	0.000136317	0.0941947	0.030614	0.0952735	0.141806	0.00109798	0.00760815
RAB39B	-0.178207	3.88387e-05	0.000559624	-0.117101	0.00712148	0.0338422	-0.147754	0.000667619	0.00523188
SRRT	-0.12065	0.00554994	0.025963	-0.171504	7.58509e-05	0.00148491	-0.15897	0.000248248	0.00257096
LRP3	-0.127937	0.00325999	0.0171488	-0.157857	0.000274696	0.00365186	-0.166327	0.000125065	0.00158685
LRFN3	-0.148954	0.00060246	0.00471899	-0.148724	0.000614465	0.00621114	-0.15467	0.00036564	0.00340652
POMT1	-0.079122	0.0695399	0.16674	-0.177194	4.3044e-05	0.00104016	-0.180744	2.99544e-05	0.00058069
EPC1	-0.105379	0.0155151	0.0554582	-0.173707	6.10445e-05	0.00130119	-0.168148	0.000105071	0.00139816
KRT13	0.214649	6.55939e-07	2.4543e-05	0.0861381	0.0481086	0.130607	0.116106	0.00762877	0.0315123
FAM101B	-0.166093	0.000127884	0.00143596	-0.129207	0.00296295	0.0184031	-0.152756	0.000433034	0.00382354
ISL2	-0.152877	0.000428438	0.00360983	-0.133021	0.00221303	0.0150479	-0.163916	0.000157079	0.00187607
ZNF470	-0.136045	0.00174655	0.0106892	-0.15231	0.000450332	0.00509608	-0.163771	0.000159232	0.00188947
FAM110C	0.193173	7.96285e-06	0.000167424	0.10625	0.014677	0.0570162	0.135806	0.00177985	0.0108041
MRPL34	-0.0848564	0.0515477	0.133736	-0.159274	0.000241452	0.00337767	-0.193303	7.8499e-06	0.000229062
OSBPL3	0.151642	0.000477409	0.00393503	0.136339	0.00170628	0.0126396	0.162231	0.000183863	0.00208743
APBA2	-0.173745	6.0813e-05	0.000799298	-0.118461	0.00647729	0.0315786	-0.15147	0.000484636	0.00412578
ZNF317	-0.148908	0.000604858	0.00473511	-0.160031	0.000225294	0.0032097	-0.143483	0.000956073	0.00685957
RWDD1	-0.144088	0.000909203	0.00648319	-0.148096	0.000648422	0.00645593	-0.159528	0.000235923	0.00249152
WNT10A	0.197534	4.9001e-06	0.000112183	0.107385	0.0136452	0.0542184	0.127435	0.00338452	0.0172695
PIM3	0.172099	7.1549e-05	0.000911153	0.154095	0.000384796	0.00458559	0.120497	0.00561036	0.0251419
ANXA6	-0.18311	2.34328e-05	0.000375468	-0.129402	0.00291949	0.0182717	-0.129632	0.00286929	0.0153784
LIN28B	-0.100812	0.02063	0.0687945	-0.153414	0.000408678	0.00478016	-0.188608	1.30861e-05	0.000321811
HOXC6	-0.153359	0.000410657	0.00350671	-0.114105	0.00874681	0.0393112	-0.176744	4.50454e-05	0.000769309
C17orf97	-0.0835818	0.0551688	0.140743	-0.168671	9.99143e-05	0.00181725	-0.185168	1.88791e-05	0.000415788
ZNF775	-0.137485	0.00155768	0.00984173	-0.149618	0.000569022	0.00592147	-0.164299	0.000151534	0.0018309
HNRNPA1P35	-0.08721	0.0453823	0.121898	-0.1764	4.66334e-05	0.0011039	-0.176229	4.74457e-05	0.000794008
ZNF444	-0.0737013	0.0909889	0.201764	-0.168212	0.00010443	0.00187223	-0.190186	1.10351e-05	0.000283302
BRD4	-0.155675	0.000334314	0.00301108	-0.140741	0.00119785	0.00989491	-0.153911	0.000391103	0.00359324
ZNF25	-0.182566	2.48006e-05	0.000393166	-0.125549	0.00389252	0.0222593	-0.133581	0.00211877	0.0122573
KIAA1549	-0.139399	0.00133575	0.0087206	-0.165858	0.000130772	0.00221169	-0.14678	0.000725202	0.00556454
ELAC2	-0.0945099	0.0300583	0.0908339	-0.177886	4.01281e-05	0.00098736	-0.170485	8.37996e-05	0.00119754
MCPH1	-0.139701	0.00130347	0.00854592	-0.161184	0.00020259	0.00299665	-0.151239	0.000494492	0.00419685
CSDE1	-0.12913	0.00298027	0.0160408	-0.122123	0.00499485	0.0264247	-0.191793	9.26497e-06	0.000253857
SNHG14	-0.144598	0.000871329	0.0062787	-0.13224	0.00235079	0.0157084	-0.171856	7.32761e-05	0.00110025
PCOLCE-AS1	-0.214261	6.87809e-07	2.5327e-05	-0.0989741	0.0230694	0.0782414	-0.104516	0.0163858	0.0548123
TYMS	-0.139088	0.00136971	0.00890436	-0.13881	0.00140073	0.0110577	-0.171781	7.38235e-05	0.0011037
USP53	0.129134	0.00297939	0.0160408	0.161916	0.000189317	0.00286736	0.160238	0.000221047	0.00237022
MSX1	-0.17151	7.58126e-05	0.000956341	-0.15404	0.00038667	0.0045922	-0.120745	0.0055123	0.0248378
KRT8P45	0.211035	1.01729e-06	3.3956e-05	0.0821774	0.059401	0.152659	0.123783	0.00442954	0.0211146
PPID	-0.142827	0.00100942	0.00701359	-0.164515	0.000148482	0.00241722	-0.144419	0.000884429	0.00646399
CDC25A	-0.106266	0.0146621	0.0531878	-0.165862	0.000130719	0.00221169	-0.173907	5.98409e-05	0.000941755
DENND2A	-0.197439	4.953e-06	0.000112833	-0.1034	0.0175759	0.0645313	-0.129809	0.00283088	0.0152194
FAM25A	0.120122	0.00576192	0.0268049	0.146375	0.000750464	0.00712531	0.180758	2.9909e-05	0.000580619
CDCA2	-0.118848	0.00630375	0.0285518	-0.169004	9.67457e-05	0.00177418	-0.161464	0.000197426	0.00218962
EXOSC9	-0.161801	0.000191351	0.00195601	-0.143775	0.000933153	0.0082888	-0.143485	0.000955897	0.00685957
GNPAT	-0.0774707	0.0755843	0.177503	-0.184617	2.00076e-05	0.000605402	-0.172635	6.78697e-05	0.00103583
TNFSF15	0.179693	3.33724e-05	0.000495742	0.116269	0.00754306	0.0352313	0.144438	0.000883043	0.00645944
CCDC174	-0.127909	0.00326668	0.017171	-0.13133	0.00252107	0.0165757	-0.185744	1.77635e-05	0.000399435
DOK7	0.192013	9.04451e-06	0.000184051	0.0864343	0.0473418	0.12908	0.148967	0.000601805	0.00481409
ACSF2	0.190683	1.04561e-05	0.000203551	0.123875	0.00440009	0.0242458	0.121927	0.00506572	0.0233013
ZNF644	-0.0917668	0.0351969	0.101642	-0.155792	0.000330814	0.00415577	-0.190797	1.03276e-05	0.000272769
NCF2	0.166128	0.000127458	0.00143419	0.13831	0.00145813	0.0113447	0.142987	0.00099611	0.00708475
TRAIP	-0.0707229	0.104862	0.222802	-0.17232	7.00091e-05	0.00140859	-0.186686	1.6073e-05	0.000369786
ANP32E	-0.0914884	0.035758	0.102664	-0.17401	5.92349e-05	0.00128026	-0.17489	5.42588e-05	0.000883308
LCORL	-0.131984	0.00239755	0.0135601	-0.120441	0.00563308	0.0288367	-0.189495	1.18928e-05	0.000298641
NBR1	0.124256	0.00427959	0.0211869	0.142937	0.00100026	0.00871405	0.179493	3.40618e-05	0.000635531
MFSD6	0.194244	7.0749e-06	0.000151501	0.12114	0.00535929	0.0277825	0.118378	0.00651491	0.0280772
RHOV	0.205034	2.07274e-06	5.70997e-05	0.0996351	0.0221646	0.0760436	0.11892	0.00627215	0.0272478
GFRA1	-0.135348	0.0018452	0.0111715	-0.14288	0.00100496	0.0087371	-0.170244	8.57852e-05	0.00121346
RTF1	-0.127718	0.00331377	0.0173517	-0.151032	0.000503449	0.00546157	-0.16952	9.20327e-05	0.00126456
KIF2A	-0.126335	0.00367298	0.0187887	-0.143629	0.000944554	0.00833688	-0.176756	4.49894e-05	0.000769309
TLE2	-0.103186	0.0178125	0.0613542	-0.169585	9.14565e-05	0.00170185	-0.171082	7.90522e-05	0.00115502
SF3A1	-0.113419	0.00916268	0.0373675	-0.162486	0.00017955	0.00276326	-0.170773	8.1477e-05	0.00117036
GTF3C6	-0.11657	0.00738797	0.0321009	-0.164118	0.00015413	0.00248303	-0.166997	0.000117331	0.00152016
EXPH5	0.207433	1.56331e-06	4.6235e-05	0.104647	0.0162518	0.0614513	0.109639	0.0117841	0.0430281
SMARCC2	-0.0836213	0.0550534	0.140526	-0.158591	0.000256986	0.00351029	-0.192153	8.90696e-06	0.000247952
KDM2B	-0.12554	0.00389513	0.0196935	-0.156871	0.000300286	0.00387725	-0.166173	0.000126917	0.00160305
LRRC47	-0.098237	0.0241159	0.0772186	-0.171514	7.57833e-05	0.00148491	-0.172191	7.09062e-05	0.00107044
DPYSL4	-0.157636	0.000280252	0.00263037	-0.120599	0.00556974	0.028586	-0.165668	0.000133147	0.00165618
NCOA5	-0.156416	0.000312834	0.00286093	-0.173245	6.39011e-05	0.00133549	-0.115311	0.00805672	0.0327785
SEH1L	-0.0656627	0.132213	0.262177	-0.190823	1.0298e-05	0.000382233	-0.169674	9.06688e-05	0.00125076
ITGA3	0.0965505	0.0266656	0.0831449	0.177387	4.22118e-05	0.0010236	0.167133	0.000115809	0.00150849
SEC23A	-0.143714	0.000937857	0.00663989	-0.162616	0.000177384	0.00275248	-0.143126	0.000984716	0.00703246
TBC1D8	0.131266	0.00253345	0.0142075	0.138692	0.00141412	0.0111141	0.175749	4.97898e-05	0.000822093
LYN	0.199569	3.89259e-06	9.39011e-05	0.0981363	0.024262	0.0809256	0.127528	0.00336103	0.0171989
ARMCX4	-0.191002	1.00999e-05	0.000201116	-0.12306	0.00466843	0.0252545	-0.119786	0.0059005	0.0260231
ZNF420	-0.146597	0.000736523	0.00550277	-0.149398	0.000579903	0.00598789	-0.151874	0.00046783	0.00402455
GALNT7	0.114528	0.00849872	0.0354385	0.155805	0.000330449	0.00415495	0.174479	5.6531e-05	0.000906073
KDM1A	-0.0990264	0.0229967	0.0744052	-0.180717	3.00387e-05	0.00080872	-0.16122	0.000201934	0.00222701
CACHD1	-0.177621	4.12225e-05	0.000586703	-0.10528	0.0156129	0.0596201	-0.1527	0.000435172	0.00383607
FZD2	-0.195097	6.43609e-06	0.000140414	-0.132718	0.00226558	0.0153081	-0.101269	0.0200592	0.063441
AKAP8L	-0.105266	0.015627	0.0557866	-0.175424	5.14389e-05	0.00115378	-0.161755	0.000192161	0.00215526
RPL13P5	-0.165532	0.000134879	0.00149712	-0.158511	0.000258847	0.00352189	-0.119511	0.00601618	0.0264236
NEO1	-0.15593	0.000326769	0.00296071	-0.129059	0.00299614	0.0185139	-0.159201	0.000243076	0.00254198
FERMT2	-0.192083	8.97476e-06	0.000183167	-0.122195	0.00496897	0.0263278	-0.117545	0.00690521	0.0292767
CRLF1	-0.131496	0.0024892	0.0140158	-0.146797	0.000724147	0.00692743	-0.167588	0.000110874	0.00145728
LIN9	-0.0862011	0.0479447	0.126992	-0.179105	3.54412e-05	0.000902108	-0.169819	8.94015e-05	0.00123819
C11orf45	0.147652	0.000673421	0.00514172	0.125757	0.00383317	0.022047	0.169652	9.08648e-05	0.00125223
LRRC17	-0.173108	6.47728e-05	0.000841019	-0.121846	0.00509522	0.0268029	-0.144886	0.000850545	0.00632074
CCDC66	-0.0978328	0.024707	0.0784078	-0.155495	0.000339725	0.00423086	-0.184674	1.98887e-05	0.000430414
DNA2	-0.0678252	0.119917	0.244668	-0.197679	4.82083e-06	0.000251427	-0.160446	0.000216853	0.0023344
MYH14	0.214541	6.64678e-07	2.4737e-05	0.0914225	0.0358919	0.106602	0.104588	0.0163119	0.0547402
PRKX	-0.0887481	0.0416974	0.115065	-0.156662	0.000305984	0.00393644	-0.188681	1.29828e-05	0.000319837
PLEKHO2	-0.206698	1.70502e-06	4.9442e-05	-0.101424	0.019869	0.0703886	-0.110149	0.0113953	0.0419829
BROX	0.197076	5.15932e-06	0.000116579	0.128766	0.00306311	0.0188236	0.100211	0.0214011	0.0666008
SEC13	-0.140404	0.00123121	0.00817615	-0.133159	0.00218937	0.0149455	-0.170466	8.3955e-05	0.00119853
B3GNT1	-0.181413	2.79542e-05	0.000431368	-0.0965312	0.0266961	0.0866161	-0.152296	0.000450861	0.00393087
APOD	0.139428	0.0013326	0.00870408	0.191599	9.4629e-06	0.000360861	0.107953	0.0131532	0.0467874
HLA-H	0.130141	0.00276046	0.0151749	0.155993	0.00032492	0.00410024	0.16029	0.000219994	0.00236235
SCAF8	-0.119604	0.00597688	0.0274924	-0.164977	0.000142155	0.0023422	-0.160668	0.000212469	0.00229965
BEND6	-0.184075	2.11809e-05	0.000346436	-0.118818	0.00631741	0.0311485	-0.131566	0.00247571	0.0137562
ALDH3B1	0.150282	0.000537305	0.00432798	0.129812	0.00283021	0.0178358	0.163411	0.000164702	0.0019297
STK3	0.168206	0.000104488	0.001214	0.147101	0.00070574	0.00679806	0.126519	0.0036231	0.018125
USP48	-0.106785	0.0141825	0.0517584	-0.13705	0.00161261	0.0121922	-0.192612	8.46921e-06	0.000238629
CD44	0.0498959	0.252862	0.411936	0.193818	7.41602e-06	0.000318592	0.171123	7.87392e-05	0.00115365
C1orf210	0.21797	4.35351e-07	1.8252e-05	0.0712675	0.102208	0.223754	0.112739	0.00959167	0.0371367
PHLDA3	0.142076	0.00107388	0.0073814	0.157793	0.000276294	0.00366101	0.146574	0.000737943	0.00563745
PDCD6	0.203411	2.50394e-06	6.62591e-05	0.11171	0.0102755	0.04413	0.105669	0.0152312	0.0523079
TMEM62	0.153206	0.000416232	0.00354128	0.147449	0.00068517	0.00668481	0.144415	0.000884683	0.00646399
AP1G2	0.210942	1.02865e-06	3.42532e-05	0.0578507	0.184838	0.33829	0.132039	0.00238747	0.0133781
TOE1	-0.147713	0.00066994	0.0051193	-0.146261	0.00075775	0.00716516	-0.151135	0.000498969	0.00422711
CPT1C	-0.131074	0.00257094	0.0143692	-0.1594	0.000238705	0.00335271	-0.155331	0.000344748	0.00325948
UPK3B	0.204955	2.09192e-06	5.72498e-05	0.0765399	0.0791753	0.18685	0.130446	0.00269721	0.0147053
SAA2	0.134174	0.00202314	0.0119121	0.150635	0.000521117	0.00559678	0.160291	0.000219976	0.00236235
KIAA1522	0.209939	1.16024e-06	3.74696e-05	0.0836208	0.0550551	0.144206	0.11762	0.00686907	0.0292056
NUMBL	-0.188599	1.30981e-05	0.000242759	-0.122896	0.00472404	0.0254761	-0.12006	0.00578716	0.0256615
CRY1	-0.154332	0.000376778	0.00329421	-0.152763	0.000432779	0.00495535	-0.137591	0.00154454	0.0097366
GNPDA2	-0.181646	2.72874e-05	0.000422955	-0.119618	0.00597111	0.0299719	-0.13299	0.0022184	0.0126329
CEACAM5	0.185908	1.74577e-05	0.000300102	0.117598	0.00687971	0.0330544	0.128696	0.00307934	0.016168
MPDZ	-0.189818	1.14842e-05	0.000219272	-0.100964	0.0204382	0.0719471	-0.136785	0.00164707	0.010168
BNC2	-0.192628	8.45498e-06	0.000174866	-0.0803265	0.0653853	0.16351	-0.146599	0.000736357	0.00562842
RPA2	-0.112241	0.00991767	0.039527	-0.154056	0.000386117	0.00459125	-0.17481	5.46941e-05	0.000887281
ZNF326	-0.0699182	0.108885	0.228765	-0.164302	0.000151486	0.00245464	-0.189987	1.12757e-05	0.000287448
HAUS6	-0.167753	0.000109139	0.00125962	-0.140952	0.00117749	0.00979059	-0.132367	0.00232782	0.0131337
USP11	-0.144651	0.000867479	0.00625619	-0.151037	0.000503227	0.00546157	-0.14925	0.000587375	0.00474502
CYP20A1	-0.151887	0.000467304	0.00387167	-0.132602	0.00228597	0.0154159	-0.158063	0.000269609	0.00272436
AFAP1L2	0.161772	0.000191868	0.00195936	0.108107	0.0130226	0.0523926	0.166333	0.000125002	0.00158685
NXF1	-0.131023	0.0025809	0.0144007	-0.174541	5.6182e-05	0.00123343	-0.138586	0.00142625	0.00923349
DPCD	-0.129637	0.00286815	0.0156005	-0.167452	0.00011233	0.00197414	-0.147442	0.000685599	0.00533219
PNMAL1	-0.144502	0.000878312	0.00631794	-0.135644	0.00180274	0.0131442	-0.162917	0.000172482	0.00199732
YWHAZP3	0.160175	0.000222321	0.00220563	0.154295	0.000378038	0.00454397	0.128242	0.00318628	0.0165608
CEP76	-0.0557641	0.201213	0.35283	-0.196333	5.6075e-06	0.000275798	-0.165234	0.000138741	0.001712
AGPAT4	-0.157505	0.000283583	0.00264912	-0.127828	0.00328662	0.0196674	-0.155633	0.000335571	0.00320138
ATG4C	-0.118891	0.00628494	0.0285137	-0.129029	0.00300291	0.0185355	-0.1888	1.28183e-05	0.000316343
GDPD3	0.20559	1.94218e-06	5.4834e-05	0.0876848	0.0442167	0.122722	0.120405	0.00564721	0.0252196
NEIL2	-0.148742	0.000613558	0.00478438	-0.15535	0.000344147	0.00427515	-0.140322	0.00123947	0.00833438
RERE	-0.111236	0.0106047	0.0415646	-0.147356	0.000690577	0.00671252	-0.180013	3.22939e-05	0.000614892
MRFAP1	-0.140348	0.00123685	0.00820966	-0.151944	0.000464973	0.00521338	-0.151866	0.000468158	0.00402488
CTTN	0.122679	0.00479857	0.0231833	0.165155	0.000139784	0.00231955	0.155497	0.000339652	0.00322264
SRPX2	0.0788214	0.0706098	0.168896	0.177442	4.19749e-05	0.00101963	0.173026	6.53003e-05	0.00100767
ILKAP	-0.133686	0.00210153	0.0122698	-0.128081	0.003225	0.0193917	-0.177127	4.33375e-05	0.000748406
GNL2	-0.138243	0.00146603	0.00938621	-0.140158	0.00125606	0.0102782	-0.164105	0.000154325	0.00184905
RBMX	-0.104679	0.0162188	0.0573377	-0.170358	8.48366e-05	0.00161317	-0.163461	0.000163927	0.0019297
CAP2	-0.173282	6.36703e-05	0.000829024	-0.107765	0.0133147	0.0532211	-0.151702	0.000474912	0.00406287
TMEM125	0.212225	8.8116e-07	3.05075e-05	0.0908028	0.0371722	0.109156	0.104973	0.0159195	0.0538869
MIR3940	-0.15897	0.000248258	0.00238311	-0.128501	0.00312467	0.0190487	-0.152185	0.000455276	0.00396309
ID3	-0.165148	0.000139873	0.0015354	-0.105755	0.0151483	0.0583263	-0.162807	0.000174258	0.00200953
GNB1	-0.17733	4.24578e-05	0.000600579	-0.119003	0.00623579	0.0309102	-0.137236	0.00158889	0.00991743
ATRIP	-0.111844	0.0101843	0.0403274	-0.168653	0.000100088	0.00181725	-0.159271	0.000241533	0.00253345
NMI	0.150653	0.00052033	0.0042181	0.145131	0.000833311	0.0076562	0.146258	0.000757952	0.00576814
AIM1L	0.201024	3.29687e-06	8.29822e-05	0.086901	0.0461545	0.126686	0.126892	0.00352415	0.0177277
FHL3	-0.186649	1.61349e-05	0.000284642	-0.1117	0.0102824	0.0441398	-0.130236	0.00274061	0.0148893
NCDN	-0.16609	0.000127925	0.00143596	-0.13488	0.00191439	0.0136929	-0.137915	0.00150512	0.00957044
CDC34	-0.124352	0.00424964	0.0210801	-0.168911	9.76266e-05	0.00178563	-0.148328	0.000635693	0.00503598
SYT8	0.201101	3.26765e-06	8.23958e-05	0.0859805	0.048521	0.131394	0.127048	0.00348347	0.0175803
TYW3	-0.131276	0.00253145	0.014202	-0.147403	0.000687872	0.00670407	-0.162875	0.000173166	0.00200191
RAB17	0.173896	5.9908e-05	0.00078964	0.128319	0.00316774	0.0191906	0.133061	0.00220613	0.0125952
CAPN1	0.187785	1.42927e-05	0.0002587	0.081962	0.0600732	0.153719	0.148929	0.000603761	0.00482419
ZNF786	-0.0863374	0.0475916	0.126393	-0.190725	1.04087e-05	0.000383276	-0.152132	0.000457396	0.00397162
MIR5004	-0.117256	0.00704507	0.0310809	-0.120043	0.00579405	0.029378	-0.194307	7.02577e-06	0.000212591
ZNF699	-0.168861	9.80916e-05	0.00115511	-0.136268	0.00171592	0.0126646	-0.131873	0.00241803	0.0134896
ZNFX1	0.098753	0.0233791	0.0753271	0.170114	8.68786e-05	0.00163466	0.16615	0.000127199	0.00160515
ALDH3B2	0.186012	1.72646e-05	0.000298146	0.138855	0.00139561	0.0110435	0.102511	0.0185776	0.0601214
TPGS2	-0.173901	5.98784e-05	0.00078964	-0.122281	0.00493816	0.0262313	-0.137933	0.00150289	0.00956871
ESYT2	0.145408	0.000814114	0.00595535	0.140956	0.00117709	0.00979059	0.154701	0.000364634	0.00340171
L3MBTL2	-0.129475	0.00290343	0.015731	-0.143602	0.000946647	0.00834476	-0.167065	0.00011657	0.00151503
TBC1D32	-0.109444	0.0119355	0.045403	-0.173721	6.09562e-05	0.00130119	-0.154774	0.000362266	0.00338188
CUL7	-0.159327	0.000240298	0.00233081	-0.126084	0.00374176	0.0216916	-0.152099	0.000458732	0.00397248
PET112	-0.167152	0.000115603	0.00132405	-0.147151	0.000702712	0.00678297	-0.122606	0.0048239	0.0224187
EVA1B	-0.174458	5.66506e-05	0.000756737	-0.135928	0.00176276	0.0129409	-0.124185	0.00430188	0.0206404
VMP1	0.149612	0.000569319	0.00451574	0.122286	0.00493647	0.0262313	0.165261	0.000138384	0.00171063
DOCK9	0.166955	0.000117801	0.00134272	0.130422	0.00270211	0.0173481	0.139607	0.00131349	0.00871842
HSD17B8	0.200634	3.44721e-06	8.55288e-05	0.102035	0.0191332	0.0686218	0.114005	0.00880651	0.0348794
CEL	0.192803	8.29409e-06	0.000173082	0.0795517	0.0680339	0.168259	0.14286	0.00100668	0.00713075
ME1	0.157964	0.000272043	0.00256708	0.171019	7.9539e-05	0.00154408	0.10561	0.015289	0.0524155
CARD14	0.182005	2.62893e-05	0.000412073	0.145919	0.0007799	0.00731325	0.0992811	0.0226453	0.0695357
ST13P6	-0.157584	0.000281566	0.00264091	-0.130644	0.00265683	0.0171762	-0.149535	0.0005731	0.0046513
ZNF519	-0.0913401	0.0360599	0.103254	-0.18185	2.67157e-05	0.000754918	-0.158058	0.000269715	0.00272436
ZNF322P1	-0.104108	0.0168133	0.0588592	-0.15896	0.000248481	0.00345009	-0.172445	6.91533e-05	0.00105196
CAV1	0.0900853	0.0387026	0.108719	0.169622	9.113e-05	0.00170031	0.171041	7.9374e-05	0.00115566
CDC40	-0.0716099	0.100566	0.216082	-0.184016	2.13129e-05	0.000635233	-0.16663	0.000121514	0.00155654
BAIAP2-AS1	-0.14207	0.00107442	0.0073815	-0.154314	0.000377392	0.00454397	-0.144707	0.000863393	0.00638553
SAFB2	-0.105539	0.0153581	0.0550103	-0.137454	0.00156159	0.0119558	-0.188455	1.33025e-05	0.000326556
ZKSCAN2	-0.169952	8.82564e-05	0.00106635	-0.129891	0.00281329	0.0177669	-0.134923	0.00190791	0.0113488
CD109	0.0903394	0.0381544	0.107548	0.184269	2.07545e-05	0.000621805	0.155404	0.000342498	0.00324426
AGPAT9	0.105964	0.014948	0.0539157	0.150706	0.000517938	0.00557124	0.177549	4.15236e-05	0.000728836
SWT1	-0.164819	0.000144281	0.00157017	-0.104901	0.0159923	0.060736	-0.160699	0.000211866	0.0022967
LYRM7	-0.105573	0.015325	0.0549199	-0.162312	0.000182486	0.00278817	-0.167721	0.000109475	0.00144298
USP46	-0.177731	4.07659e-05	0.00058197	-0.0884439	0.0424055	0.119383	-0.155563	0.000337659	0.00321249
GPD2	0.174917	5.41141e-05	0.000728447	0.145768	0.000789886	0.00737569	0.11018	0.011372	0.0419193
CD59	0.0668825	0.125163	0.252428	0.173708	6.10356e-05	0.00130119	0.177923	3.99792e-05	0.000708879
NINL	-0.130173	0.00275378	0.0151442	-0.169327	9.37709e-05	0.00173269	-0.139264	0.00135037	0.00891251
ZNF3	-0.126726	0.00356802	0.0184075	-0.177608	4.12764e-05	0.00100794	-0.132993	0.00221781	0.0126329
ZEB1	-0.199601	3.87834e-06	9.37197e-05	-0.105291	0.0156022	0.0596113	-0.110072	0.0114535	0.0421302
CEP89	-0.135381	0.00184043	0.0111523	-0.151158	0.000497978	0.00545347	-0.152383	0.00044744	0.00391698
FAM83E	0.167898	0.000107632	0.00124326	0.109256	0.0120835	0.0497015	0.152316	0.000450098	0.00393087
RFXAP	-0.13091	0.00260325	0.0144997	-0.150475	0.000528401	0.00565891	-0.156689	0.000305248	0.0029774
ANXA11	0.197756	4.77915e-06	0.000110374	0.0628854	0.149408	0.291752	0.141804	0.00109812	0.00760815
PRDM4	-0.162546	0.00017855	0.00185891	-0.133433	0.00214337	0.014725	-0.139098	0.00136861	0.00898573
TSTD1	0.206981	1.6491e-06	4.81212e-05	0.102023	0.0191482	0.0686562	0.0976662	0.0249543	0.0747929
KDM5C	-0.147034	0.000709764	0.0053604	-0.129342	0.00293277	0.018308	-0.159216	0.000242748	0.00254046
KPNA6	-0.102511	0.0185774	0.0634082	-0.15921	0.000242874	0.00339414	-0.170813	8.1158e-05	0.0011694
WTIP	-0.136843	0.00163945	0.0102415	-0.147082	0.000706878	0.00680431	-0.15369	0.000398833	0.00364249
GPR63	-0.128027	0.00323785	0.0170905	-0.162102	0.00018608	0.00282756	-0.147672	0.000672302	0.00526013
PPIL4	-0.105795	0.0151098	0.0543725	-0.151615	0.000478557	0.0053076	-0.174779	5.48662e-05	0.000888527
LGALS9	0.152596	0.000439176	0.00368468	0.154061	0.000385944	0.00459125	0.129854	0.00282122	0.0151909
CCDC77	-0.166332	0.000125017	0.00141014	-0.138862	0.00139488	0.0110435	-0.128295	0.00317343	0.0165132
FAM156B	-0.132051	0.0023852	0.0135284	-0.132046	0.00238615	0.0158609	-0.170331	8.50632e-05	0.00120693
TARDBP	-0.0700966	0.107982	0.227625	-0.158841	0.000251185	0.0034571	-0.188231	1.36259e-05	0.000331572
ZNF254	-0.102028	0.0191411	0.0649502	-0.165022	0.000141543	0.00234101	-0.165186	0.000139371	0.00171825
MT2A	0.0595488	0.172254	0.316725	0.181822	2.67928e-05	0.000754918	0.171843	7.33724e-05	0.00110051
PIK3CB	0.187008	1.55302e-05	0.000276072	0.133358	0.00215592	0.0147824	0.100818	0.0206224	0.0647661
CRTC1	-0.152812	0.00043089	0.0036239	-0.1331	0.00219942	0.0149774	-0.14873	0.000614169	0.00488772
KCNH3	-0.136062	0.00174409	0.0106849	-0.161801	0.000191345	0.00287617	-0.139715	0.00130204	0.0086548
RPL23AP79	-0.128347	0.00316118	0.0167685	-0.129396	0.00292095	0.0182727	-0.175097	5.31485e-05	0.000870322
ATG10	-0.124008	0.00435775	0.0214638	-0.144758	0.000859728	0.00780597	-0.166184	0.000126787	0.00160286
CAMK2N1	0.136267	0.00171615	0.0105865	0.13933	0.00134321	0.0107449	0.160283	0.000220128	0.00236235
ZSCAN22	-0.114535	0.00849494	0.0354385	-0.153015	0.000423265	0.00488915	-0.166689	0.000120833	0.00155155
ENO2	-0.169009	9.67007e-05	0.00114163	-0.0923207	0.0341028	0.103121	-0.160688	0.000212089	0.00229733
ORMDL2	0.156104	0.000321707	0.00292287	0.113086	0.00937073	0.0412765	0.161082	0.000204512	0.00224575
LINC00511	0.147045	0.000709052	0.00535831	0.14781	0.000664415	0.00656396	0.141524	0.0011236	0.0077346
RNASE1	0.153819	0.000394283	0.00341295	0.148136	0.000646188	0.00644392	0.133348	0.00215758	0.0123943
PDLIM5	0.126115	0.00373307	0.0190401	0.135103	0.00188114	0.0135386	0.172248	7.05077e-05	0.00106558
IFT88	-0.13431	0.00200179	0.0118314	-0.15654	0.00030936	0.00397231	-0.14597	0.000776565	0.00587127
KIAA0753	-0.106127	0.0147927	0.0535222	-0.172317	7.00298e-05	0.00140859	-0.153497	0.00040569	0.00367101
BRD3	-0.112711	0.00961017	0.0386489	-0.173492	6.23583e-05	0.00131709	-0.147114	0.000704961	0.00543922
MURC	-0.119082	0.00620098	0.0282556	-0.150466	0.000528837	0.00565891	-0.165051	0.000141161	0.00173265
FRMD4B	0.161798	0.0001914	0.00195601	0.159525	0.000235973	0.00332745	0.109697	0.0117392	0.0428965
SNRNP27	-0.122248	0.00495019	0.0237611	-0.108835	0.0124208	0.0505957	-0.193068	8.05571e-06	0.000232629
FAM117B	-0.11161	0.0103445	0.0407543	-0.140075	0.00126457	0.0103053	-0.178711	3.6899e-05	0.000668746
ZNF771	-0.159661	0.000233063	0.00227969	-0.13744	0.00156325	0.011962	-0.136548	0.00167833	0.0103229
TOB1	0.173431	6.27319e-05	0.000818337	0.123744	0.00444218	0.024439	0.131177	0.00255065	0.0140771
LRIG2	-0.105738	0.0151651	0.0545151	-0.136199	0.00172535	0.0127066	-0.185514	1.82008e-05	0.000407951
FAM84B	0.167057	0.000116654	0.001332	0.152765	0.000432699	0.00495535	0.109694	0.0117419	0.0428965
ALG1L	0.185904	1.74641e-05	0.000300102	0.105954	0.0149572	0.0577343	0.128094	0.00322166	0.0166762
CDKN2C	-0.169997	8.78722e-05	0.00106263	-0.112364	0.00983646	0.0427863	-0.144633	0.000868741	0.00640038
ALOX5	0.188138	1.37634e-05	0.000252062	0.119917	0.00584595	0.0295353	0.111605	0.0103479	0.0392781
PWWP2B	0.209067	1.28769e-06	4.00969e-05	0.0841798	0.0534444	0.14121	0.105909	0.0150007	0.0516961
ZNF311	0.157768	0.000276902	0.00260595	0.138151	0.00147688	0.011465	0.137429	0.00156471	0.00982373
MX1	0.158819	0.000251692	0.00241274	0.155188	0.000349149	0.004306	0.118231	0.00658248	0.0282608
GUSBP9	-0.0845594	0.0523733	0.135298	-0.167738	0.000109291	0.0019354	-0.17153	7.5663e-05	0.00112396
ZC3HAV1L	-0.112195	0.00994802	0.0396289	-0.161814	0.000191116	0.00287617	-0.158628	0.000256112	0.00262006
SOS1-IT1	-0.0830489	0.0567441	0.143682	-0.151486	0.000483929	0.00533319	-0.186014	1.72625e-05	0.000390693
PMS1	-0.132131	0.0023706	0.013457	-0.150277	0.000537556	0.00570352	-0.152357	0.000448451	0.00392331
CHMP4C	0.199827	3.77984e-06	9.21393e-05	0.0728465	0.0948108	0.212064	0.129512	0.00289537	0.015435
MAP7	0.194591	6.8081e-06	0.000147834	0.0980736	0.0243533	0.0811913	0.120477	0.00561852	0.025161
SNORD116-20	-0.153926	0.000390584	0.00338514	-0.124318	0.00426024	0.0237003	-0.153032	0.000422661	0.00376634
FBXO5	-0.140772	0.00119484	0.0079948	-0.149614	0.00056922	0.00592147	-0.144682	0.000865194	0.00638867
IFFO1	-0.230352	8.91358e-08	5.38826e-06	-0.0447079	0.305642	0.477145	-0.0866555	0.046776	0.117733
PDLIM2	0.173831	6.0295e-05	0.000793238	0.118986	0.00624287	0.0309233	0.133309	0.00216401	0.0124261
SLC2A3P1	-0.0579318	0.184222	0.331939	-0.152931	0.000426412	0.00491299	-0.196154	5.72075e-06	0.0001878
PMEPA1	0.11782	0.00677434	0.0301258	0.170848	8.08788e-05	0.00155921	0.144166	0.000903293	0.00657236
LMNA	0.107752	0.0133262	0.0494368	0.171774	7.38674e-05	0.0014688	0.151035	0.000503311	0.00425354
C9orf40	-0.129912	0.00280884	0.015368	-0.125503	0.00390557	0.0222793	-0.174494	5.6449e-05	0.000906073
IPO13	-0.18602	1.72501e-05	0.000298146	-0.066253	0.128764	0.262872	-0.152136	0.000457248	0.00397162
PI4KAP2	-0.0854902	0.0498224	0.130665	-0.165414	0.0001364	0.00228192	-0.172409	6.93973e-05	0.00105337
ITSN1	-0.152959	0.000425358	0.00359246	-0.161478	0.000197172	0.00294152	-0.11726	0.00704361	0.0297632
AGBL5	-0.107378	0.0136513	0.0502145	-0.15174	0.000473339	0.00527487	-0.170583	8.29971e-05	0.00118852
C3orf52	0.17867	3.7051e-05	0.000541147	0.110823	0.010899	0.0460545	0.132982	0.00221971	0.0126329
SEPT11	-0.186607	1.62074e-05	0.000285197	-0.114186	0.00869857	0.0391197	-0.118261	0.0065685	0.0282356
ZFP1	-0.150259	0.000538403	0.00433431	-0.148561	0.000623134	0.00628052	-0.134482	0.00197492	0.0116183
SBNO2	0.124935	0.00407204	0.0203807	0.146217	0.000760566	0.00718387	0.161623	0.00019453	0.00216787
HES7	-0.0755764	0.0830375	0.189165	-0.193837	7.4008e-06	0.000318592	-0.147568	0.000678278	0.00529498
ZNF142	-0.11364	0.00902689	0.0369598	-0.17184	7.33909e-05	0.00146561	-0.145806	0.000787362	0.00592306
LSR	0.210575	1.07505e-06	3.55431e-05	0.0665288	0.127176	0.26051	0.114107	0.00874553	0.0347301
COLGALT2	-0.136101	0.00173881	0.0106619	-0.1253	0.00396439	0.0225226	-0.168732	9.93245e-05	0.00134157
PRIMPOL	-0.172366	6.96949e-05	0.000890802	-0.136079	0.00174182	0.0128006	-0.118029	0.00667628	0.028593
MRPL37	-0.11781	0.0067788	0.0301258	-0.130507	0.00268457	0.0172833	-0.179608	3.36638e-05	0.000631492
MED16	-0.159834	0.000229408	0.00225823	-0.143036	0.000992098	0.00867401	-0.127924	0.00326295	0.0168383
MTFR1L	-0.14321	0.000977914	0.0068479	-0.115495	0.00795571	0.0366189	-0.168943	9.73178e-05	0.00132024
FAM21B	-0.104708	0.0161887	0.0572715	-0.184869	1.94838e-05	0.00059999	-0.137669	0.00153497	0.00968943
WFDC2	0.185914	1.74459e-05	0.000300102	0.083044	0.0567588	0.147338	0.141767	0.00110145	0.00761657
FOXG1	-0.165802	0.00013147	0.00146747	-0.134418	0.00198487	0.0140112	-0.128435	0.00314042	0.0164021
SEPT6	-0.133029	0.00221158	0.0127783	-0.139525	0.00132223	0.0106383	-0.159486	0.000236835	0.00249547
KMT2A	-0.0849555	0.0512748	0.133259	-0.176088	4.81221e-05	0.00112189	-0.16086	0.000208743	0.00227396
TUBB2A	-0.210495	1.08551e-06	3.5803e-05	-0.0543885	0.212571	0.371283	-0.119835	0.00588023	0.0259618
MIR24-2	0.121135	0.0053612	0.0251933	0.153069	0.000421291	0.0048785	0.157532	0.000282875	0.0028164
KIF7	-0.141002	0.00117266	0.00788131	-0.106911	0.0140688	0.0554113	-0.176228	4.74474e-05	0.000794008
POSTN	-0.18479	1.96452e-05	0.000327327	-0.109274	0.0120696	0.0496737	-0.123565	0.00450025	0.0213329
ARHGEF5	0.203477	2.48471e-06	6.60014e-05	0.0766079	0.0789085	0.186378	0.118241	0.00657792	0.0282587
ARNT	-0.131305	0.00252587	0.0141822	-0.149282	0.000585743	0.00603029	-0.151668	0.000476321	0.00406993
PMM1	-0.173074	6.49905e-05	0.00084306	-0.0834919	0.055432	0.144812	-0.157254	0.000290094	0.00287799
TINCR	0.152899	0.000427615	0.00360507	0.151641	0.00047744	0.00529943	0.126245	0.00369747	0.0184022
VIM-AS1	-0.206168	1.81483e-06	5.19765e-05	-0.0754443	0.0835786	0.193695	-0.113839	0.00890611	0.0351671
ST3GAL3	-0.188364	1.34335e-05	0.000247657	-0.0884325	0.0424322	0.119383	-0.133903	0.0020664	0.0120344
CEP170	-0.205252	2.02068e-06	5.59163e-05	-0.103164	0.0178371	0.0653003	-0.0911024	0.0365483	0.0981319
HMG20A	-0.156981	0.000297302	0.00275142	-0.119417	0.00605657	0.0303126	-0.150892	0.000509641	0.00429661
TTC26	-0.147358	0.000690472	0.00524887	-0.148925	0.00060398	0.00613634	-0.135163	0.00187228	0.0112184
SEMA6C	-0.131651	0.00245962	0.0138661	-0.147785	0.000665842	0.00656476	-0.152025	0.000461692	0.00398317
OPRL1	-0.139851	0.00128772	0.00849069	-0.158289	0.000264128	0.00355895	-0.133845	0.00207571	0.012072
MSLN	0.175933	4.88791e-05	0.00066752	0.116846	0.00724846	0.0342701	0.128911	0.0030298	0.0159621
MYO6	0.189018	1.25208e-05	0.000235192	0.0930768	0.0326564	0.0998123	0.129364	0.002928	0.0155612
GNB4	-0.206732	1.69833e-06	4.93507e-05	-0.068526	0.11613	0.244503	-0.11689	0.00722657	0.0302789
ATP6V0E2-AS1	-0.126445	0.00364322	0.0186846	-0.15032	0.000535531	0.00570318	-0.154527	0.000370322	0.00343635
GLT8D1	-0.137996	0.00149534	0.00954318	-0.133225	0.0021782	0.0148984	-0.158899	0.000249877	0.00258399
TAF5	-0.0950989	0.0290431	0.0887098	-0.175474	5.11824e-05	0.0011509	-0.153784	0.000395508	0.00362653
SCCPDH	-0.0519149	0.234142	0.39124	-0.159017	0.000247195	0.00344071	-0.190647	1.04964e-05	0.00027566
AFF4	-0.177308	4.25491e-05	0.00060126	-0.0834943	0.055425	0.144812	-0.150986	0.000505464	0.00426656
ITGB2	0.137231	0.00158959	0.0100125	0.120703	0.00552875	0.0284596	0.169071	9.61206e-05	0.00130782
PAXBP1	-0.0801361	0.0660282	0.160701	-0.184456	2.03493e-05	0.000613077	-0.152753	0.000433139	0.00382354
ZNF77	-0.126509	0.00362575	0.0186087	-0.140765	0.00119554	0.00988755	-0.162468	0.000179859	0.0020537
TNNI2	0.194518	6.86347e-06	0.000148795	0.0982608	0.0240815	0.0805358	0.116069	0.00764813	0.0315489
CCDC8	-0.161266	0.000201073	0.00203101	-0.115479	0.00796454	0.0366353	-0.14816	0.000644869	0.00509128
GMEB1	-0.0945925	0.0299142	0.0905557	-0.161805	0.000191287	0.00287617	-0.167477	0.000112065	0.00146738
GALNT6	0.187557	1.46464e-05	0.00026305	0.105711	0.0151911	0.0584587	0.120575	0.00557945	0.0250411
TNK1	0.208565	1.367e-06	4.18054e-05	0.0656786	0.13212	0.267527	0.114182	0.00870141	0.0346537
ARID1B	-0.12751	0.0033656	0.0175797	-0.139202	0.00135719	0.0108325	-0.162382	0.000181303	0.00206679
ERCC6	0.156237	0.000317888	0.00289573	0.125575	0.00388514	0.0222449	0.145318	0.000820319	0.00612555
LY75	0.197232	5.06961e-06	0.000114821	0.105521	0.0153759	0.0589256	0.103174	0.0178261	0.0583495
SPRR2D	0.11952	0.0060125	0.0276198	0.190089	1.11527e-05	0.000406629	0.113784	0.00893896	0.0352768
SELRC1	-0.109298	0.0120505	0.045728	-0.156145	0.000320533	0.00407008	-0.161475	0.000197218	0.00218906
CSTA	0.143862	0.000926442	0.0065758	0.137062	0.00161112	0.0121922	0.147978	0.000654969	0.00514766
MAML1	-0.103097	0.017912	0.0616055	-0.154198	0.000381276	0.00457498	-0.167498	0.00011184	0.00146581
SLC25A33	-0.0999254	0.0217771	0.0715232	-0.145642	0.000798276	0.00742231	-0.176558	4.58972e-05	0.000780982
SNRNP200	-0.105152	0.0157404	0.056082	-0.161557	0.000195719	0.00292297	-0.158995	0.000247696	0.00256714
SLC9B2	-0.156401	0.000313252	0.00286287	-0.153803	0.000394865	0.00464985	-0.115949	0.00771141	0.0317184
ITM2C	-0.138965	0.00138339	0.00897267	-0.13648	0.00168732	0.0125569	-0.153101	0.000420081	0.00375473
TSPYL4	-0.133815	0.00208062	0.0121732	-0.155372	0.000343471	0.00427237	-0.140629	0.00120888	0.00818009
SENP6	-0.082928	0.0571069	0.144312	-0.154748	0.000363113	0.00442571	-0.178584	3.7377e-05	0.00067565
FAM175A	-0.134945	0.00190461	0.0114219	-0.16282	0.000174048	0.0027135	-0.131312	0.00252451	0.0139707
REEP1	-0.149288	0.000585407	0.0046192	-0.133649	0.00210764	0.0145517	-0.144455	0.000881758	0.00645622
EPOR	-0.139257	0.00135115	0.00879639	-0.13536	0.00184344	0.0133501	-0.153099	0.000420155	0.00375473
FAM156A	-0.132096	0.00237689	0.0134871	-0.129512	0.00289545	0.0181376	-0.164478	0.000149001	0.00180815
ZCCHC3	-0.11676	0.00729201	0.031877	-0.162482	0.000179621	0.00276326	-0.148299	0.000637233	0.00504243
PHTF2	-0.142086	0.00107301	0.00737904	-0.136783	0.00164725	0.0123468	-0.148666	0.000617548	0.004909
DXO	-0.110016	0.0114954	0.0442001	-0.135105	0.00188086	0.0135386	-0.177151	4.32317e-05	0.000748406
GOPC	-0.1402	0.00125184	0.00829166	-0.15704	0.000295728	0.00384259	-0.130955	0.00259434	0.0142504
PSME2	0.186918	1.56802e-05	0.000278383	0.0969139	0.0260975	0.0853704	0.125538	0.00389555	0.0191207
USP47	-0.149526	0.000573578	0.00453873	-0.125138	0.00401178	0.0227361	-0.150416	0.00053112	0.0044294
TMA7	-0.105038	0.0158548	0.0563685	-0.145524	0.000806223	0.00746131	-0.171931	7.27438e-05	0.00109343
SLX1A-SULT1A3	0.191676	9.38334e-06	0.000189285	0.0983428	0.0239632	0.0802367	0.116841	0.007251	0.0303304
SYT11	-0.183298	2.29766e-05	0.000370151	-0.0937417	0.0314282	0.0970168	-0.132553	0.00229463	0.012978
PDLIM1	0.179465	3.416e-05	0.000505823	0.110591	0.0110679	0.0465139	0.124826	0.00410485	0.0199984
ARHGEF34P	0.203587	2.45318e-06	6.55389e-05	0.0845607	0.0523696	0.139215	0.105975	0.0149376	0.0515795
SCEL-AS1	0.135192	0.00186806	0.011261	0.117047	0.00714832	0.0339119	0.169864	8.90182e-05	0.00123657
DPY19L2	-0.149866	0.00055697	0.00444013	-0.106943	0.0140398	0.055344	-0.163431	0.000164395	0.0019297
BAG2	-0.14867	0.000617335	0.00480505	-0.14835	0.000634458	0.0063628	-0.12941	0.00291784	0.0155191
CCDC102A	-0.169304	9.39842e-05	0.00111344	-0.123973	0.00436891	0.0241391	-0.126945	0.00351039	0.0176946
APOL1	0.13432	0.00200025	0.0118273	0.15174	0.00047333	0.00527487	0.141726	0.00110516	0.00763031
TP53BP2	-0.158181	0.000266745	0.0025223	-0.142142	0.00106805	0.00913087	-0.124146	0.00431398	0.0206718
DSP	0.208586	1.36362e-06	4.18054e-05	0.0739708	0.0898097	0.203958	0.10404	0.0168851	0.0560031
DPYSL2	-0.212725	8.29335e-07	2.90769e-05	-0.0975226	0.025169	0.0830947	-0.0728532	0.0947803	0.199042
HNRNPA1P10	-0.0699755	0.108594	0.228433	-0.185963	1.7355e-05	0.000556601	-0.152926	0.000426626	0.0037882
ETFDH	-0.137863	0.00151134	0.00961439	-0.146359	0.000751506	0.00712942	-0.142954	0.000998897	0.00709732
NR2C2	-0.127801	0.00329331	0.0172957	-0.111453	0.0104529	0.0446903	-0.17968	3.34165e-05	0.000629397
ZNF510	-0.12845	0.00313677	0.0166517	-0.15679	0.000302465	0.00389816	-0.142099	0.00107182	0.00749682
MPHOSPH9	-0.126186	0.00371379	0.0189737	-0.145556	0.000804092	0.0074515	-0.154485	0.000371714	0.00344238
GTF2F1	-0.172324	6.99842e-05	0.000893679	-0.115032	0.00821143	0.037486	-0.130625	0.00266068	0.0145346
NFKBIZ	0.107672	0.0133948	0.049601	0.166462	0.000123472	0.00212173	0.149586	0.000570595	0.0046418
PLAU	0.13259	0.002288	0.0130841	0.131897	0.00241366	0.0160056	0.160455	0.000216681	0.0023344
CTSZ	0.136033	0.0017481	0.0106906	0.14135	0.00113975	0.00955673	0.149068	0.000596627	0.00479545
PAX6	-0.130565	0.00267279	0.0148099	-0.122486	0.0048658	0.0260188	-0.169419	9.29432e-05	0.00127174
HNRNPR	-0.11452	0.00850354	0.0354389	-0.151429	0.00048635	0.00535139	-0.15884	0.000251209	0.00258684
THSD4	0.141142	0.00115927	0.00780613	0.129057	0.00299658	0.0185139	0.154584	0.000368436	0.00342569
GLT8D2	-0.161339	0.000199715	0.00202371	-0.130029	0.00278402	0.0176702	-0.131395	0.00250839	0.0139045
RNF216	-0.134903	0.00191096	0.0114463	-0.125179	0.00399993	0.0226875	-0.163321	0.00016609	0.00194269
RPA1	-0.103781	0.0171611	0.0597582	-0.164122	0.000154079	0.00248303	-0.154674	0.000365507	0.00340652
C14orf132	-0.192499	8.57564e-06	0.000176547	-0.123924	0.00438453	0.0241792	-0.0864628	0.0472687	0.118675
TRIM3	-0.160563	0.00021454	0.00214398	-0.100875	0.0205504	0.0722325	-0.15512	0.000351299	0.0032974
CACTIN-AS1	-0.146669	0.00073207	0.00547832	-0.140268	0.00124488	0.0101986	-0.138748	0.00140775	0.00914348
TRIM36	-0.130405	0.0027055	0.0149555	-0.134931	0.00190673	0.0136592	-0.159297	0.000240962	0.00252937
OSGIN1	0.13448	0.00197523	0.0117342	0.14985	0.000557739	0.00583448	0.141901	0.00108944	0.00758953
DDAH2	-0.109231	0.012103	0.0459149	-0.162224	0.000183983	0.00280182	-0.151751	0.000472903	0.00404818
CDK11A	-0.0662739	0.128643	0.257255	-0.153035	0.000422529	0.00488876	-0.185113	1.89877e-05	0.000416861
GPRASP2	-0.148866	0.000607046	0.00474464	-0.123123	0.00464683	0.0252161	-0.150368	0.000533306	0.00443965
BMPR2	-0.174548	5.61432e-05	0.000752124	-0.112403	0.00981051	0.0427127	-0.128054	0.0032313	0.0167137
DCUN1D4	-0.171235	7.78791e-05	0.000975697	-0.104161	0.0167572	0.0627184	-0.139498	0.0013251	0.0087859
DSG2	0.161477	0.000197186	0.00200192	0.0940872	0.0308057	0.0956894	0.157573	0.000281846	0.00281018
NRP2	0.0677078	0.120561	0.245586	0.198011	4.64359e-06	0.000251427	0.139597	0.00131454	0.00872122
ING5	-0.126979	0.0035014	0.0181445	-0.154298	0.000377921	0.00454397	-0.144079	0.000909815	0.00659885
GOLGA7B	0.152681	0.000435884	0.00366369	0.14497	0.000844606	0.00774445	0.125454	0.00391988	0.0192183
DENND3	0.136852	0.00163819	0.0102389	0.141301	0.00114432	0.00958348	0.146771	0.000725756	0.00556573
HAUS8	-0.147215	0.000698947	0.00529882	-0.140125	0.0012594	0.0102865	-0.137035	0.00161456	0.0100347
MARK4	-0.150838	0.000512036	0.00417242	-0.129534	0.00289043	0.0181143	-0.14263	0.00102596	0.00724152
TAP1	0.150236	0.00053945	0.00433694	0.146041	0.000771937	0.00725722	0.127276	0.00342483	0.0173903
PRNP	0.0526275	0.227775	0.383807	0.170961	7.99966e-05	0.00154505	0.174169	5.83056e-05	0.000925377
UFSP2	-0.185208	1.87988e-05	0.000316779	-0.08299	0.0569207	0.147675	-0.133997	0.00205127	0.0119714
PRAF2	-0.181762	2.69605e-05	0.000419757	-0.0750141	0.0853607	0.196702	-0.143632	0.000944265	0.00678886
MIR4435-1HG	0.104707	0.0161894	0.0572715	0.166354	0.000124746	0.00213673	0.149763	0.000561972	0.00459488
PNRC2	-0.0594424	0.173024	0.317594	-0.172345	6.98401e-05	0.00140859	-0.169577	9.15323e-05	0.00125893
PUM1	-0.0682982	0.117351	0.241164	-0.182174	2.58325e-05	0.000737076	-0.155774	0.000331367	0.00317216
LIPA	0.13628	0.00171428	0.0105854	0.134171	0.00202356	0.0141894	0.153119	0.000419411	0.0037542
WNK1	-0.146838	0.000721644	0.00541778	-0.153351	0.000410952	0.00479467	-0.123199	0.00462135	0.021709
ZDHHC7	0.156785	0.000302612	0.00278759	0.107165	0.0138402	0.0547742	0.153241	0.00041495	0.00372625
ZYX	-0.143606	0.000946376	0.00669	-0.157961	0.000272121	0.00362802	-0.121782	0.00511852	0.0234976
BIRC3	0.144044	0.000912516	0.00650016	0.141972	0.00108312	0.00922078	0.137853	0.00151255	0.00958615
C6orf141	0.136868	0.00163622	0.0102311	0.119867	0.00586691	0.0295953	0.16361	0.000161663	0.00190694
NUP188	-0.118669	0.00638365	0.0288113	-0.173596	6.17169e-05	0.00130751	-0.129548	0.00288742	0.015428
IRF1	0.149657	0.0005671	0.00450562	0.13289	0.0022355	0.015149	0.139946	0.00127788	0.00853083
ARHGAP5	0.157208	0.000291289	0.00270477	0.124006	0.00435834	0.024119	0.139194	0.00135798	0.00894546
AHCTF1P1	-0.0861719	0.0480206	0.127145	-0.174212	5.80552e-05	0.00126064	-0.153149	0.000418299	0.00374666
TIMM13	-0.145709	0.000793837	0.00584007	-0.148812	0.000609855	0.0061825	-0.128147	0.00320897	0.0166353
IL23A	0.170165	8.64449e-05	0.00105544	0.0973552	0.0254214	0.0837255	0.143578	0.000948576	0.00681633
ASAP3	-0.109903	0.0115815	0.0444206	-0.124922	0.004076	0.0229599	-0.180495	3.07311e-05	0.000591628
NAA40	-0.123139	0.00464151	0.0225813	-0.174704	5.52762e-05	0.00121739	-0.122932	0.00471169	0.0220063
HNRNPA1P7	-0.0669983	0.124509	0.251493	-0.186877	1.57485e-05	0.000515773	-0.149476	0.000576038	0.00467242
KCTD6	-0.143759	0.000934416	0.0066189	-0.126138	0.00372688	0.0216324	-0.151109	0.000500116	0.00423426
USP42	-0.0918652	0.0350004	0.101199	-0.139194	0.00135805	0.0108325	-0.181314	2.82403e-05	0.00055441
FXR2	-0.154867	0.000359303	0.00316929	-0.127946	0.00325767	0.0195506	-0.137439	0.00156343	0.00982009
FUT10	-0.116592	0.00737681	0.0320969	-0.180155	3.18256e-05	0.000845383	-0.122321	0.00492401	0.022785
KRT14	0.14318	0.0009804	0.00685059	0.110967	0.0107958	0.0457571	0.163073	0.000169995	0.00197675
SLC25A17	-0.134234	0.00201365	0.0118762	-0.131713	0.00244798	0.0161869	-0.155457	0.000340881	0.0032321
EFNA2	-0.120242	0.0057131	0.0266312	-0.163484	0.000163582	0.0025992	-0.139063	0.0013725	0.00900216
SPATS2L	0.0924348	0.0338812	0.09897	0.163256	0.000167101	0.0026347	0.160057	0.000224748	0.00239798
PAXIP1	-0.0757325	0.0824015	0.188116	-0.186583	1.62496e-05	0.000529692	-0.144899	0.000849606	0.00631713
CCL28	0.143382	0.000964115	0.00678781	0.149312	0.000584248	0.00601935	0.129532	0.00289103	0.0154339
GPR3	-0.168746	9.91939e-05	0.00116611	-0.120617	0.00556272	0.028571	-0.125728	0.00384148	0.0189407
ZNF346	-0.114388	0.0085803	0.0357038	-0.129664	0.00286225	0.0180026	-0.173163	6.44207e-05	0.000996302
SPATA33	-0.127237	0.00343485	0.0178661	-0.160548	0.000214847	0.00311506	-0.134639	0.0019509	0.0115295
TNRC6C	-0.139444	0.00133089	0.00869701	-0.134917	0.00190874	0.0136595	-0.14721	0.000699208	0.00540982
TLR6	0.11699	0.00717668	0.0315018	0.138444	0.00144251	0.0112483	0.164276	0.000151858	0.00183153
PAFAH1B3	-0.116742	0.00730103	0.0318868	-0.155298	0.000345751	0.00428923	-0.14904	0.000598063	0.00479545
SUSD5	-0.207308	1.58668e-06	4.66914e-05	-0.0904698	0.0378759	0.110546	-0.084641	0.0521455	0.127717
NCKIPSD	-0.104663	0.0162344	0.057352	-0.145877	0.000782641	0.0073308	-0.166368	0.000124584	0.00158364
EVL	-0.14879	0.000611015	0.00477237	-0.129218	0.00296052	0.0183962	-0.141857	0.00109338	0.00760556
KCNH2	-0.093608	0.0316719	0.0943913	-0.181716	2.70896e-05	0.000760202	-0.138352	0.00145325	0.0093474
ABL1	-0.207617	1.52975e-06	4.55944e-05	-0.100362	0.0212049	0.0737509	-0.0727498	0.0952513	0.199729
TMEM171	0.0614859	0.158692	0.299017	0.179085	3.55166e-05	0.000902108	0.159493	0.000236668	0.00249547
CHURC1	0.163754	0.000159492	0.00170243	0.109313	0.012039	0.0496043	0.141007	0.00117213	0.00798184
RNFT2	-0.121861	0.00508976	0.0242286	-0.153277	0.000413615	0.00481363	-0.146114	0.000767154	0.00581908
RALB	0.100721	0.0207448	0.0690781	0.174936	5.40122e-05	0.00119877	0.140549	0.00121674	0.00821678
B3GNT5	0.151423	0.000486613	0.00399596	0.122048	0.00502193	0.0265276	0.144375	0.00088764	0.0064788
SKA1	-0.14913	0.000593413	0.00466914	-0.132582	0.00228952	0.0154314	-0.137862	0.00151145	0.00958443
TXNL4A	-0.132363	0.00232851	0.0132559	-0.116698	0.00732306	0.0345155	-0.16704	0.000116849	0.00151719
SNURF	-0.0939309	0.031086	0.0930907	-0.131557	0.00247751	0.0163356	-0.183808	2.17821e-05	0.000457984
ZNF691	-0.142902	0.00100316	0.00698151	-0.123153	0.00463684	0.0251772	-0.1521	0.000458688	0.00397248
IFI16	0.0268703	0.538229	0.687935	0.202699	2.71876e-06	0.000181935	0.146723	0.000728723	0.00558233
DHRS9	0.158724	0.000253887	0.0024271	0.0945965	0.0299071	0.0936507	0.156095	0.000321962	0.00310131
TAB1	-0.140847	0.00118756	0.00796224	-0.137228	0.00158995	0.012089	-0.142213	0.00106186	0.00744214
CYP24A1	0.134341	0.00199689	0.0118125	0.0947346	0.0296674	0.0932146	0.179103	3.54482e-05	0.000650927
DDAH1	-0.0568037	0.192928	0.342521	-0.181657	2.72565e-05	0.000761814	-0.157907	0.000273455	0.00275215
ETV7	0.190736	1.03962e-05	0.000203114	0.103441	0.0175306	0.0644504	0.104385	0.016522	0.0551395
ASNSD1	-0.169625	9.11053e-05	0.0010913	-0.127852	0.00328057	0.0196397	-0.114678	0.0084124	0.0338221
DDX49	-0.12727	0.00342655	0.0178429	-0.132405	0.00232104	0.0155995	-0.158598	0.00025682	0.00262073
CDC23	-0.0840246	0.0538875	0.138183	-0.143679	0.000940627	0.00831946	-0.179516	3.39815e-05	0.000635531
THOP1	-0.120282	0.00569672	0.0265726	-0.156955	0.00029801	0.00386163	-0.14283	0.00100916	0.00714473
TMEM45B	0.199741	3.81697e-06	9.2882e-05	0.0764015	0.0797212	0.187693	0.109989	0.0115162	0.0422941
TRAF4	0.161935	0.000188986	0.0019399	0.0969764	0.0260008	0.0851543	0.150217	0.000540322	0.00448464
ZNF100	-0.0889122	0.0413198	0.114159	-0.164043	0.000155229	0.00248921	-0.158639	0.000255857	0.00262006
MYO9B	-0.174131	5.85233e-05	0.000776536	-0.102447	0.0186516	0.067414	-0.130957	0.00259404	0.0142504
NIPAL3	0.132648	0.00227781	0.0130526	0.148784	0.000611358	0.00618422	0.138459	0.00144082	0.00929753
ZMAT1	-0.136165	0.00172994	0.010643	-0.108151	0.0129857	0.0522848	-0.168562	0.000100962	0.00135472
ALKBH7	-0.121389	0.00526463	0.0248065	-0.123521	0.00451492	0.0247317	-0.169798	8.95874e-05	0.00123953
ABCC4	-0.1306	0.00266573	0.0147885	-0.145185	0.000829525	0.0076414	-0.143685	0.000940176	0.00677345
IFT52	-0.145546	0.000804753	0.00590789	-0.158823	0.000251602	0.0034571	-0.112494	0.00975101	0.0375033
PRKCD	0.191609	9.45258e-06	0.000190406	0.0673349	0.122624	0.25418	0.12904	0.00300052	0.0158558
PREPL	-0.133885	0.00206917	0.0121359	-0.130336	0.0027198	0.0174055	-0.153628	0.000401007	0.00364573
ZNF579	-0.104182	0.0167348	0.0586582	-0.162605	0.00017758	0.00275248	-0.149043	0.000597895	0.00479545
GTSE1	-0.12977	0.00283938	0.0154925	-0.13151	0.00248638	0.0163863	-0.15615	0.000320365	0.0030914
CHCHD3	-0.108608	0.0126059	0.0474477	-0.147514	0.00068136	0.00665534	-0.159556	0.000235324	0.00248854
RNF5	-0.0705448	0.105742	0.224022	-0.151081	0.000501311	0.00546157	-0.179293	3.47662e-05	0.000642644
RBBP8NL	0.2061	1.82924e-06	5.21746e-05	0.0782512	0.0726761	0.176164	0.0944047	0.0302428	0.0859256
LINC00863	-0.0817614	0.0607048	0.1511	-0.186095	1.71141e-05	0.000551414	-0.138079	0.00148539	0.00948401
NT5E	0.0769136	0.0777174	0.180502	0.140871	0.00118525	0.0098258	0.184087	2.11548e-05	0.000449548
TBC1D3C	0.169458	9.25886e-05	0.00110337	0.104275	0.0166369	0.062428	0.134515	0.00196992	0.0115938
MBD5	-0.188721	1.29275e-05	0.000240517	-0.0606896	0.164166	0.312077	-0.136033	0.00174813	0.0106574
C5orf24	-0.124284	0.00427077	0.0211547	-0.145707	0.000793941	0.00739188	-0.148082	0.000649203	0.00511679
APBA3	-0.128173	0.00320263	0.016956	-0.107523	0.0135246	0.0538316	-0.175002	5.36591e-05	0.00087662
GDF15	0.159256	0.000241862	0.00233946	0.139008	0.00137854	0.0109582	0.1161	0.00763178	0.0315123
NAB2	-0.132936	0.00222759	0.0128495	-0.127784	0.00329737	0.0197148	-0.155128	0.000351037	0.0032974
PKNOX1	-0.155511	0.000339245	0.0030425	-0.121563	0.0051997	0.0271473	-0.136611	0.00166994	0.0102849
CDS1	0.188651	1.30247e-05	0.000241721	0.095149	0.028958	0.0916225	0.112046	0.0100479	0.038423
PAQR3	-0.173174	6.43523e-05	0.00083634	-0.117972	0.00670252	0.0323932	-0.116085	0.00763966	0.0315257
ZNF558	-0.13146	0.0024961	0.0140376	-0.138574	0.0014276	0.0111855	-0.147092	0.000706275	0.00544286
MIR3917	-0.115689	0.00785035	0.0334668	-0.148211	0.000642037	0.00641991	-0.152033	0.000461377	0.00398317
HLA-A	0.131021	0.00258135	0.0144007	0.148383	0.000632672	0.00635824	0.138326	0.0014563	0.00935837
BGN	-0.175663	5.02224e-05	0.000683998	-0.102078	0.0190823	0.0685683	-0.1262	0.00370988	0.0184421
DPH1	-0.0934113	0.0320335	0.0952315	-0.166237	0.000126147	0.00215441	-0.151179	0.000497053	0.00421602
ZNF253	-0.128268	0.00317986	0.0168611	-0.156172	0.000319746	0.00406443	-0.132983	0.00221949	0.0126329
NAP1L3	-0.197355	5.00004e-06	0.000113533	-0.0999748	0.0217117	0.0748961	-0.0901914	0.038473	0.101943
METTL6	-0.128585	0.00310513	0.0165152	-0.11576	0.00781238	0.0361865	-0.167625	0.000110485	0.00145354
PRMT6	-0.124457	0.00421703	0.0209706	-0.143672	0.000941176	0.00831946	-0.148437	0.000629773	0.00499192
FUT2	0.166813	0.000119409	0.00135456	0.0976029	0.0250488	0.082855	0.141456	0.00112989	0.00777026
LSM3	-0.0965906	0.0266025	0.0830226	-0.120967	0.00542572	0.0280642	-0.186451	1.64782e-05	0.00037626
GUSBP3	-0.118658	0.00638867	0.0288246	-0.127578	0.00334867	0.019953	-0.166834	0.000119175	0.00153406
KATNA1	-0.102616	0.0184559	0.0630864	-0.162659	0.000176686	0.00274475	-0.148127	0.000646664	0.00510256
TENM3	-0.192645	8.43886e-06	0.000174792	-0.0779272	0.073872	0.17814	-0.118086	0.00664938	0.0285216
MYSM1	-0.0887277	0.0417446	0.11511	-0.12621	0.00370718	0.021545	-0.187075	1.54194e-05	0.000358302
UBXN8	-0.143041	0.000991742	0.00691239	-0.141941	0.00108587	0.0092385	-0.131356	0.00251602	0.0139413
MON1A	-0.101176	0.0201736	0.0676128	-0.152743	0.000433531	0.00495535	-0.158369	0.000262218	0.00266021
WDR81	-0.113249	0.00926838	0.0376771	-0.149238	0.000587967	0.00603992	-0.152297	0.000450842	0.00393087
TMEM40	0.1669	0.000118423	0.00134668	0.119638	0.00596262	0.0299616	0.122801	0.00475663	0.0221801
ST13P15	-0.146349	0.000752121	0.00559528	-0.116849	0.00724675	0.0342701	-0.149373	0.000581155	0.00470296
PCSK9	0.151051	0.000502638	0.00411246	0.083365	0.0558053	0.145487	0.16713	0.000115852	0.00150849
ZMYM6	-0.0841822	0.0534377	0.137412	-0.150253	0.000538687	0.00570623	-0.171048	7.93166e-05	0.00115566
B3GNT2	0.166138	0.00012734	0.00143402	0.0946202	0.029866	0.0936061	0.14366	0.000942083	0.00678036
PCDHB2	-0.16187	0.000190129	0.00194731	-0.118353	0.00652642	0.0317516	-0.130402	0.00270613	0.0147308
ANKRD26	-0.124757	0.0041257	0.0205753	-0.138797	0.00140217	0.0110577	-0.151773	0.000471966	0.00404514
ACVR2B	-0.0933777	0.0320956	0.0953492	-0.148134	0.00064629	0.00644392	-0.167129	0.000115854	0.00150849
ADORA1	-0.144892	0.000850177	0.00616013	-0.117817	0.00677542	0.0326435	-0.149679	0.000566042	0.00461254
TPRA1	0.122756	0.00477202	0.0230872	0.144613	0.000870229	0.00788588	0.148112	0.000647502	0.00510628
CORO2A	0.178489	3.77429e-05	0.000547233	0.104878	0.0160155	0.0607909	0.118483	0.00646738	0.027965
COBL	0.150345	0.000534392	0.0043095	0.109584	0.0118267	0.0488908	0.150383	0.000532659	0.00443866
SCO1	-0.0785707	0.0715122	0.170296	-0.178493	3.7726e-05	0.000939371	-0.145836	0.000785354	0.00591327
MANEA	-0.123486	0.0045263	0.0221369	-0.161839	0.000190682	0.00287551	-0.129725	0.00284894	0.0152929
ZMAT5	-0.150367	0.000533381	0.00430634	-0.119196	0.00615148	0.0306561	-0.142227	0.0010606	0.00743705
NRGN	-0.156124	0.000321126	0.00292141	-0.14142	0.00113327	0.00952539	-0.113773	0.0089456	0.0352834
LRRK1	0.169055	9.62693e-05	0.0011375	0.109052	0.0122459	0.0500587	0.127326	0.00341209	0.0173395
IFIT5	0.0601627	0.167866	0.311217	0.170665	8.23406e-05	0.00157865	0.162727	0.000175565	0.00201791
CHMP4B	0.156759	0.000303323	0.00279229	0.0989675	0.0230786	0.0782537	0.149997	0.000550708	0.00454375
PADI1	0.165643	0.000133472	0.00148504	0.11452	0.0085036	0.0384291	0.12724	0.00343402	0.0174001
WHSC1L1	-0.108698	0.0125323	0.0472987	-0.161134	0.000203533	0.0030074	-0.143186	0.000979856	0.00700358
SYNGR2	0.198276	4.50683e-06	0.000105224	0.063296	0.146764	0.288003	0.115219	0.00810743	0.0329001
TBC1D5	-0.147988	0.000654435	0.00503264	-0.11683	0.00725661	0.0342971	-0.146214	0.000760725	0.00578292
GPATCH3	-0.109624	0.0117953	0.0450175	-0.132245	0.00234983	0.0157084	-0.167965	0.000106932	0.00141751
SH3BGR	-0.155011	0.000354719	0.00313994	-0.121142	0.00535847	0.0277825	-0.134587	0.0019588	0.011543
KRT8P33	0.196733	5.36178e-06	0.000120372	0.0667474	0.125929	0.258695	0.115541	0.00793076	0.0323909
S100A10	0.139142	0.0013638	0.00887456	0.140592	0.00121256	0.00999862	0.134882	0.00191401	0.0113753
MVP	0.116893	0.0072247	0.0316527	0.153233	0.000415239	0.00482653	0.144042	0.00091263	0.00661265
SMIM7	-0.150872	0.000510533	0.00416536	-0.0967251	0.0263914	0.0859229	-0.157496	0.000283799	0.00282359
HDHD2	-0.12898	0.00301409	0.0161664	-0.128408	0.00314672	0.0191179	-0.155243	0.000347464	0.0032724
ZNF833P	-0.112833	0.0095316	0.0384329	-0.166157	0.000127114	0.00216296	-0.13348	0.00213556	0.0123187
MCOLN1	-0.169746	9.00384e-05	0.00108067	-0.095893	0.027721	0.0890249	-0.13596	0.00175834	0.0106968
C1orf198	-0.120656	0.00554751	0.025963	-0.138073	0.0014861	0.0115237	-0.154371	0.00037548	0.00347033
LLGL2	0.218207	4.22667e-07	1.78276e-05	0.0336486	0.440803	0.605501	0.091568	0.0355968	0.0963042
VIM	-0.199641	3.86062e-06	9.34539e-05	-0.069199	0.112581	0.239349	-0.107811	0.0132751	0.047149
ITPKC	0.169684	9.05866e-05	0.00108603	0.103756	0.0171881	0.0636897	0.129775	0.00283832	0.0152535
ST3GAL1	0.0750064	0.0853929	0.193016	0.166349	0.000124805	0.00213673	0.159038	0.000246719	0.00255893
ZNF107	-0.0771597	0.0767691	0.179188	-0.168422	0.000102336	0.00184509	-0.155525	0.000338803	0.00321897
CDK20	-0.124442	0.00422175	0.0209866	-0.139517	0.00132308	0.0106389	-0.149043	0.000597895	0.00479545
KLK5	0.140631	0.00120869	0.00805737	0.125979	0.003771	0.0218066	0.145351	0.000818018	0.00611164
CLGN	-0.162421	0.000180639	0.00187776	-0.12533	0.0039556	0.0225002	-0.120001	0.00581159	0.0257125
LPCAT2	0.158202	0.000266222	0.00251907	0.142813	0.00101054	0.00876918	0.106985	0.0140011	0.0492
FGD3	0.167337	0.000113576	0.00130435	0.105457	0.0154386	0.0591169	0.131121	0.00256162	0.0141312
REV3L	-0.118276	0.00656178	0.0294055	-0.116384	0.00748391	0.03505	-0.172328	6.99539e-05	0.00105951
KCTD20	-0.15908	0.000245768	0.00236083	-0.100959	0.0204449	0.0719527	-0.14454	0.000875521	0.0064308
TOMM40L	-0.129986	0.00279325	0.0153188	-0.133991	0.00205217	0.0143323	-0.148448	0.000629178	0.00499116
PROCA1	-0.0793501	0.068737	0.165356	-0.167962	0.000106974	0.00190648	-0.154318	0.000377257	0.00347981
PLEKHA7	0.214153	6.96915e-07	2.55946e-05	0.0693093	0.112008	0.238495	0.0754063	0.0837349	0.18143
POLR1E	-0.149318	0.000583922	0.0046101	-0.14681	0.000723369	0.00692474	-0.114118	0.00873894	0.0347139
SLC35B4	-0.171483	7.60069e-05	0.000956546	-0.128482	0.0031293	0.0190511	-0.102232	0.0189013	0.0608998
SULT4A1	-0.112673	0.00963409	0.0387043	-0.166476	0.000123312	0.00212161	-0.131672	0.00245577	0.0136563
HOXB4	-0.14182	0.00109664	0.00747509	-0.106403	0.014534	0.0566663	-0.158389	0.000261746	0.00265928
EAF1-AS1	-0.0829126	0.0571532	0.144377	-0.125934	0.00378347	0.0218334	-0.187076	1.54187e-05	0.000358302
[truncated: 3,857 more rows]

## Sheet: Table S3 RNAseq-Epithelial
Genes	24hr correlation coefficient	24hr P-value for correlation	24hr adjusted P-value for correlation	48hr correlation coefficient	48hr P-value for correlation	48hr adjusted P-value for correlation	72hr correlation coefficient	72hr P-value for correlation	72hr adjusted P-value for correlation
[truncated: 988 more rows]

[truncated: 19 more sheets: Table S3 RNAseq-Mesenchymal, Table S3 RPPA-Global, Table S3 RPPA-Epithelial, Table S3 RPPA-Mesenchymal, Table S4 Header Info, Table S4 HT29 Mageck, Table S4 SW620 Mageck, Table S4 HCT15 Mageck, Table S4 HT29 STARS, Table S4 SW620 STARS, Table S4 HCT15 STARS, Table S4 summary, Table S4 readcounts HCT15, Table S4 readcounts SW620, Table S4 readcounts HT29, Table S4 PRISM readcounts, Table S4 Protein readcounts, Table S5 CRISPR-PRISM genes, Table S5 CRSIPR-PRISMstratified]
